# Supplementary material
Source: publisher site journal article supplement (https://www.spandidos-publications.com/1109/downloadSupplementary)
Supplement: Supplementary file 1 [file downloadSupplementary]

## Sheet: NIR
Table SVI. Alternative splicing events.
#ID	Chr	Ass1	Ass2	Strand	Mss1	Mss2	Type	Isoform	KorN	shCtrl_1st:Ratio	shCtrl_1st:Alt_average_sj	shCtrl_1st:Model_average_sj	shCtrl_1st:Alt_sj	shCtrl_1st:Model_sj	shCtrl_1st:isfiltered	shCtrl_2nd:Ratio	shCtrl_2nd:Alt_average_sj	shCtrl_2nd:Model_average_sj	shCtrl_2nd:Alt_sj	shCtrl_2nd:Model_sj	shCtrl_2nd:isfiltered	shFLNB_1st:Ratio	shFLNB_1st:Alt_average_sj	shFLNB_1st:Model_average_sj	shFLNB_1st:Alt_sj	shFLNB_1st:Model_sj	shFLNB_1st:isfiltered	shFLNB_2nd:Ratio	shFLNB_2nd:Alt_average_sj	shFLNB_2nd:Model_average_sj	shFLNB_2nd:Alt_sj	shFLNB_2nd:Model_sj	shFLNB_2nd:isfiltered	Gene	Symbol	Chr	GeneType	Description
known_NIR_1	chr1	100011533	100015302	+	100011533	100022386	A3SS	ENST00000465289.5	known	1	76	0	76	0	n	1	70	0	70	0	n	0.97	94	3	94	3	y	1	82	0	82	0	n	ENSG00000117620.12	SLC35A3	chr1	protein_coding	solute carrier family 35 (UDP-N-acetylglucosamine (UDP-GlcNAc) transporter), member A3
known_NIR_2	chr1	100017815	100022386	+	100011533	100022386	A5SS	ENST00000465289.5	known	1	18	0	18	0	n	1	14	0	14	0	n	0.97	85	3	85	3	y	1	28	0	28	0	n	ENSG00000117620.12	SLC35A3	chr1	protein_coding	solute carrier family 35 (UDP-N-acetylglucosamine (UDP-GlcNAc) transporter), member A3
known_NIR_3	chr1	100139711	100140408	+	100139711	100140182	A3SS&ES	ENST00000370139.1	known	0	0	22	0	22	n	0.47	14	16	14	16	y	0	0	85	0	85	n	0.36	16	29	16	29	y	ENSG00000122435.9	TRMT13	chr1	protein_coding	tRNA methyltransferase 13 homolog (S. cerevisiae)
known_NIR_4	chr1	100139711;100140251	100140182;100140408	+	100139711	100140408	cassetteExon	ENST00000370143.5	known	1	18.5	0	22;15	0	n	0.5	14	14	16;12	14	y	1	62	0	85;39	0	n	0.65	29.5	16	29;30	16	y	ENSG00000122435.9	TRMT13	chr1	protein_coding	tRNA methyltransferase 13 homolog (S. cerevisiae)
known_NIR_5	chr1	100140251	100140450	+	100140251	100140408	A3SS	ENST00000370141.6	known	0.25	5	15	5	15	y	0.37	7	12	7	12	y	0.26	14	39	14	39	y	0.19	7	30	7	30	y	ENSG00000122435.9	TRMT13	chr1	protein_coding	tRNA methyltransferase 13 homolog (S. cerevisiae)
known_NIR_6	chr1	100211124	100214817	-	100210771	100214817	A3SS	ENST00000370132.8	known	0.6	24	16	24	16	y	0	0	20	0	20	n	0.26	5	14	5	14	y	0	0	29	0	29	n	ENSG00000137992.14	DBT	chr1	protein_coding	dihydrolipoamide branched chain transacylase E2
known_NIR_7	chr1	100266624;100267538	100267500;100268152	+	100266624	100268152	cassetteExon	ENST00000370128.8	known	0.13	7	46	0;14	46	n	0.02	1.5	79	3;0	79	n	0.04	5.5	119	5;6	119	y	0.1	15	130	18;12	130	y	ENSG00000137996.12	RTCA	chr1	protein_coding	RNA 3'-terminal phosphate cyclase
known_NIR_8	chr1	10072214	10072454	+	10072214	10095461	A3SS	ENST00000253251.12	known	0	0	95	0	95	n	0.21	16	61	16	61	y	0	0	130	0	130	n	0.07	15	193	15	193	y	ENSG00000130939.18	UBE4B	chr1	protein_coding	ubiquitination factor E4B
known_NIR_9	chr1	100888828	100894633	-	100888864	100894633	A3SS	ENST00000535414.5	known	1	10	0	10	0	n	0.71	10	4	10	4	y	0.9	52	6	52	6	y	0.95	40	2	40	2	y	ENSG00000162694.13	EXTL2	chr1	protein_coding	exostosin-like glycosyltransferase 2
known_NIR_10	chr1	100990628	100992637	-	100990631	100992637	A3SS	ENST00000370109.7	known	0.07	15	198	15	198	y	0.13	34	233	34	233	y	0.19	49	205	49	205	y	0.06	12	203	12	203	y	ENSG00000117543.19	DPH5	chr1	protein_coding	diphthamide biosynthesis 5
known_NIR_11	chr1	100990631	100995110	-	100990631;100992740	100992637;100995110	ES	ENST00000370109.7	known	0.14	35	207.5	35	198;217	y	0.35	128	242	128	233;251	y	0.16	35	181	35	205;157	y	0.09	18	187.5	18	203;172	y	ENSG00000117543.19	DPH5	chr1	protein_coding	diphthamide biosynthesis 5
known_NIR_12	chr1	100990631	100995110	-	100992740	100995110	A3SS&ES	ENST00000342173.11	known	0.14	35	217	35	217	y	0.34	128	251	128	251	y	0.18	35	157	35	157	y	0.09	18	172	18	172	y	ENSG00000117543.19	DPH5	chr1	protein_coding	diphthamide biosynthesis 5
known_NIR_13	chr1	101001544	101021641	-	101013818	101021641	A3SS&ES	ENST00000370109.7	known	0	0	88	0	88	n	0	0	217	0	217	n	0.04	8	202	8	202	y	0	0	175	0	175	n	ENSG00000117543.19	DPH5	chr1	protein_coding	diphthamide biosynthesis 5
known_NIR_14	chr1	101025466	101025665	-	101025466	101025683	A5SS	ENST00000370109.7	known	0.12	24	172	24	172	y	0.12	25	188	25	188	y	0.2	42	163	42	163	y	0.08	12	141	12	141	y	ENSG00000117543.19	DPH5	chr1	protein_coding	diphthamide biosynthesis 5
known_NIR_15	chr1	101026061	101075395	+	101072830	101075395	5pMXE	ENST00000454721.5	known	0.17	3	15	3	15	y	1	8	0	8	0	n	0.14	3	18	3	18	y	0.03	1	28	1	28	n	ENSG00000233184.6	RP11-421L21.3	chr1	antisense		--
known_NIR_16	chr1	101026061;101072830	101072660;101075395	+	101026061	101075395	cassetteExon	ENST00000446527.5	known	0.79	11.5	3	8;15	3	y	0.45	6.5	8	13;0	8	n	0.84	15.5	3	13;18	3	y	0.95	18	1	8;28	1	n	ENSG00000233184.6	RP11-421L21.3	chr1	antisense		--
known_NIR_17	chr1	10105744;10106583	10106197;10117459	+	10105744	10117459	cassetteExon	ENST00000253251.12	known	0.06	7	112	14;0	112	n	0.06	5	82	10;0	82	n	0.03	3	87	0;6	87	n	0.08	11	134	17;5	134	y	ENSG00000130939.18	UBE4B	chr1	protein_coding	ubiquitination factor E4B
known_NIR_18	chr1	101072830	101075276	+	101072830	101075395	A3SS	ENST00000454721.5	known	0	0	15	0	15	n	-	-	-	-	-	-	0.28	7	18	7	18	y	0.03	1	28	1	28	n	ENSG00000233184.6	RP11-421L21.3	chr1	antisense		--
known_NIR_19	chr1	101075716	101077363	+	101075394	101077363	A5SS	ENST00000453011.5	known	1	12	0	12	0	n	1	11	0	11	0	n	1	7	0	7	0	n	0.62	10	6	10	6	y	ENSG00000233184.6	RP11-421L21.3	chr1	antisense		--
known_NIR_20	chr1	10278128	10282322	+	10278128	10279097	A3SS&ES	ENST00000622724.3	known	0.26	6	17	6	17	y	1	6	0	6	0	n	1	21	0	21	0	n	1	3	0	3	0	n	ENSG00000054523.16	KIF1B	chr1	protein_coding	kinesin family member 1B
known_NIR_21	chr1	10278128	10282322	+	10278128	10282400	A3SS	ENST00000377093.8	known	0.19	6	25	6	25	y	0.11	6	48	6	48	y	0.3	21	48	21	48	y	0.03	3	87	3	87	y	ENSG00000054523.16	KIF1B	chr1	protein_coding	kinesin family member 1B
known_NIR_22	chr1	10278128	10282400	+	10278128	10279097	A3SS&ES	ENST00000377086.5	known	0.6	25	17	25	17	y	1	48	0	48	0	n	1	48	0	48	0	n	1	87	0	87	0	n	ENSG00000054523.16	KIF1B	chr1	protein_coding	kinesin family member 1B
known_NIR_23	chr1	10278128;10279138	10279097;10282400	+	10278128	10282400	cassetteExon	ENST00000377093.8	known	0.4	17	25	17;17	25	y	0	0	48	0;0	48	n	0	0	48	0;0	48	n	0	0	87	0;0	87	n	ENSG00000054523.16	KIF1B	chr1	protein_coding	kinesin family member 1B
known_NIR_24	chr1	10297246	10320043	+	10297246	10303163	3pMXE	ENST00000377093.8	known	0.35	33	60	33	60	y	0.51	23	22	23	22	y	0.4	48	72	48	72	y	0.28	39	100	39	100	y	ENSG00000054523.16	KIF1B	chr1	protein_coding	kinesin family member 1B
known_NIR_25	chr1	103541475	103543296	+	103541475	103543299	A3SS	ENST00000524631.5	known	1	10	0	10	0	n	0.35	7	13	7	13	y	1	48	0	48	0	n	0.67	10	5	10	5	y	ENSG00000185946.15	RNPC3	chr1	protein_coding	RNA-binding region (RNP1, RRM) containing 3
known_NIR_26	chr1	10431401	10434657	+	10433965	10434657	A5SS&ES	ENST00000602787.5	known	0.05	6	104	6	104	y	0	0	89	0	89	n	0	0	106	0	106	n	0	0	172	0	172	n	ENSG00000251503.7	APITD1-CORT	chr1	protein_coding	APITD1-CORT readthrough
known_NIR_27	chr1	1050837;1051043	1051032;1051253	+	1050837	1051253	cassetteExon	ENST00000379370.6	known	0.03	18.5	633	14;23	633	y	0.03	10	357	8;12	357	y	0	0	425	0;0	425	n	0.02	10	487	8;12	487	y	ENSG00000188157.13	AGRN	chr1	protein_coding	agrin
known_NIR_28	chr1	1051815	1051993	+	1051815	1053753	A3SS	ENST00000379370.6	known	0.02	17	669	17	669	y	0	0	512	0	512	n	0	0	503	0	503	n	0.02	12	743	12	743	y	ENSG00000188157.13	AGRN	chr1	protein_coding	agrin
known_NIR_29	chr1	1082987	1084353	-	1082987	1083915	A5SS	ENST00000379339.5	known	0.72	56	22	56	22	y	1	68	0	68	0	n	0.93	52	4	52	4	y	0.85	71	13	71	13	y	ENSG00000131591.17	C1orf159	chr1	protein_coding	chromosome 1 open reading frame 159
known_NIR_30	chr1	108375981;108376296	108376084;108452190	+	108375981;108450779	108450567;108452190	MXE	ENST00000444143.6	known	0.48	15	16.5	7;23	7;26	y	0.29	6	14.5	12;0	12;17	n	0.47	10.5	12	13;8	15;9	y	0.36	8.5	15	11;6	13;17	y	ENSG00000186086.16	NBPF6	chr1	protein_coding	neuroblastoma breakpoint family, member 6
known_NIR_31	chr1	108376296	108377707	+	108376296	108452190	A3SS	ENST00000294652.12	known	0.28	9	23	9	23	y	-	-	-	-	-	-	0	0	8	0	8	n	0	0	6	0	6	n	ENSG00000186086.16	NBPF6	chr1	protein_coding	neuroblastoma breakpoint family, member 6
known_NIR_32	chr1	108450464	108450567	+	108375981	108450567	A5SS	ENST00000444143.6	known	0.22	2	7	2	7	n	0.08	1	12	1	12	n	0.17	3	15	3	15	y	0.32	6	13	6	13	y	ENSG00000186086.16	NBPF6	chr1	protein_coding	neuroblastoma breakpoint family, member 6
known_NIR_33	chr1	108450779	108452190	+	108376296	108452190	A5SS	ENST00000294652.12	known	0.53	26	23	26	23	y	1	17	0	17	0	n	0.53	9	8	9	8	y	0.74	17	6	17	6	y	ENSG00000186086.16	NBPF6	chr1	protein_coding	neuroblastoma breakpoint family, member 6
known_NIR_34	chr1	108648991;108649433	108649341;108650211	-	108648991	108650211	cassetteExon	ENST00000402983.5	known	0	0	174	0;0	174	n	0.03	6	224	4;8	224	y	0.01	1.5	285	3;0	285	n	0.03	5.5	200	0;11	200	n	ENSG00000162639.15	HENMT1	chr1	protein_coding	HEN1 methyltransferase homolog 1 (Arabidopsis)
known_NIR_35	chr1	108659962	108661184	-	108659962	108660963	5pMXE	ENST00000402983.5	known	0.04	5	113	5	113	y	0.54	41	35	41	35	y	0.18	26	118	26	118	y	0.15	22	128	22	128	y	ENSG00000162639.15	HENMT1	chr1	protein_coding	HEN1 methyltransferase homolog 1 (Arabidopsis)
known_NIR_36	chr1	108823244	108823370	-	108820626	108823370	A3SS	ENST00000370001.7	known	0	0	9	0	9	n	0.25	4	12	4	12	y	0.38	3	5	3	5	n	0	0	5	0	5	n	ENSG00000162641.18	AKNAD1	chr1	protein_coding	AKNA domain containing 1
known_NIR_37	chr1	108823271	108823370	-	108820626	108823370	A3SS	ENST00000370001.7	known	0	0	9	0	9	n	0	0	12	0	12	n	0.62	8	5	8	5	y	0	0	5	0	5	n	ENSG00000162641.18	AKNAD1	chr1	protein_coding	AKNA domain containing 1
known_NIR_38	chr1	108823271	108823370	-	108823244	108823370	A3SS	ENST00000369994.5	known	-	-	-	-	-	-	0	0	4	0	4	n	0.73	8	3	8	3	y	-	-	-	-	-	-	ENSG00000162641.18	AKNAD1	chr1	protein_coding	AKNA domain containing 1
known_NIR_39	chr1	108950448;108962469	108962309;108963361	-	108950448	108963361	cassetteExon	ENST00000356970.6	known	0.57	20	15	37;3	15	y	0.9	18	2	12;24	2	y	0.69	22.5	10	16;29	10	y	0.34	16	31	7;25	31	y	ENSG00000121940.15	CLCC1	chr1	protein_coding	chloride channel CLIC-like 1
known_NIR_40	chr1	108982785	108983282	-	108982779	108983282	A3SS	ENST00000400794.7	known	0	0	16	0	16	n	0.14	4	25	4	25	y	0.45	21	26	21	26	y	0.08	6	70	6	70	y	ENSG00000085433.15	WDR47	chr1	protein_coding	WD repeat domain 47
known_NIR_41	chr1	109004715	109010916	-	109004718	109010916	A3SS	ENST00000400794.7	known	0.83	53	11	53	11	y	0.45	18	22	18	22	y	1	37	0	37	0	n	0.88	35	5	35	5	y	ENSG00000085433.15	WDR47	chr1	protein_coding	WD repeat domain 47
known_NIR_42	chr1	109011718	109013841	-	109011718	109013820	A5SS	ENST00000400794.7	known	1	10	0	10	0	n	0.77	17	5	17	5	y	1	50	0	50	0	n	0.17	1	5	1	5	n	ENSG00000085433.15	WDR47	chr1	protein_coding	WD repeat domain 47
known_NIR_43	chr1	1092103	1105956	-	1092103	1115022	A5SS	ENST00000379339.5	known	1	14	0	14	0	n	0.82	14	3	14	3	y	1	3	0	3	0	n	1	21	0	21	0	n	ENSG00000131591.17	C1orf159	chr1	protein_coding	chromosome 1 open reading frame 159
known_NIR_44	chr1	1092103	1105956	-	1092103	1116060	A5SS	ENST00000421241.6	known	0.23	14	47	14	47	y	0.42	14	19	14	19	y	0.07	3	37	3	37	y	0.27	21	57	21	57	y	ENSG00000131591.17	C1orf159	chr1	protein_coding	chromosome 1 open reading frame 159
known_NIR_45	chr1	1092103	1116060	-	1092103;1115075	1115022;1116060	ES	ENST00000379339.5	known	1	47	0	47	0;0	n	0.86	19	3	19	3;3	y	1	37	0	37	0;0	n	1	57	0	57	0;0	n	ENSG00000131591.17	C1orf159	chr1	protein_coding	chromosome 1 open reading frame 159
known_NIR_46	chr1	109236548;109236870	109236805;109237244	+	109236548	109237244	cassetteExon	ENST00000234677.6	known	0.04	30	791	5;55	791	y	0	0	779	0;0	779	n	0.04	37	835	4;70	835	y	0	0	912	0;0	912	n	ENSG00000031698.12	SARS	chr1	protein_coding	seryl-tRNA synthetase
known_NIR_47	chr1	109282731	109283028	-	109282731	109283063	A5SS	ENST00000369904.7	known	0.06	2	30	2	30	y	0.27	9	24	9	24	y	0	0	6	0	6	n	0	0	44	0	44	n	ENSG00000134222.16	PSRC1	chr1	protein_coding	proline/serine-rich coiled-coil 1
known_NIR_48	chr1	109282731	109283074	-	109282731	109283028	A5SS	ENST00000409267.5	known	0.8	8	2	8	2	y	0.53	10	9	10	9	y	1	20	0	20	0	n	1	5	0	5	0	n	ENSG00000134222.16	PSRC1	chr1	protein_coding	proline/serine-rich coiled-coil 1
known_NIR_49	chr1	109282731	109283074	-	109282731	109283063	A5SS	ENST00000369904.7	known	0.21	8	30	8	30	y	0.29	10	24	10	24	y	0.77	20	6	20	6	y	0.1	5	44	5	44	y	ENSG00000134222.16	PSRC1	chr1	protein_coding	proline/serine-rich coiled-coil 1
known_NIR_50	chr1	109282736	109283063	-	109282731	109283063	A3SS	ENST00000369904.7	known	0.59	43	30	43	30	y	0.56	31	24	31	24	y	0.85	35	6	35	6	y	0.43	33	44	33	44	y	ENSG00000134222.16	PSRC1	chr1	protein_coding	proline/serine-rich coiled-coil 1
known_NIR_51	chr1	109282789	109283074	-	109282731	109283074	A3SS	ENST00000409138.6	known	0	0	8	0	8	n	0	0	10	0	10	n	0.09	2	20	2	20	y	0.72	13	5	13	5	y	ENSG00000134222.16	PSRC1	chr1	protein_coding	proline/serine-rich coiled-coil 1
known_NIR_52	chr1	109345881	109347483	-	109345878	109347483	A3SS	ENST00000538502.5	known	0.5	17	17	17	17	y	0.53	39	34	39	34	y	0.38	24	40	24	40	y	0.61	57	36	57	36	y	ENSG00000134243.11	SORT1	chr1	protein_coding	sortilin 1
known_NIR_53	chr1	109369589	109397587	-	109369589	109393027	5pMXE	ENST00000538502.5	known	1	28	0	28	0	n	1	19	0	19	0	n	1	37	0	37	0	n	0.73	22	8	22	8	y	ENSG00000134243.11	SORT1	chr1	protein_coding	sortilin 1
known_NIR_54	chr1	109421926	109425326	-	109421926	109426302	A5SS	ENST00000271308.8	known	0.02	33	1564	33	1564	y	0.01	24	1711	24	1711	y	0.01	21	1948	21	1948	y	0	8	1716	8	1716	y	ENSG00000143106.12	PSMA5	chr1	protein_coding	proteasome (prosome, macropain) subunit, alpha type, 5
known_NIR_55	chr1	109494154	109495143	+	109494287	109495143	A5SS	ENST00000496961.5	known	1	11	0	11	0	n	0.7	7	3	7	3	y	0	0	10	0	10	n	0	0	9	0	9	n	ENSG00000174151.14	CYB561D1	chr1	protein_coding	cytochrome b561 family, member D1
known_NIR_56	chr1	109494287;109494623	109494520;109495143	+	109494287	109495143	cassetteExon	ENST00000496961.5	known	1	2	0	0;4	0	n	0.76	9.5	3	12;7	3	y	0.33	5	10	2;8	10	y	0.33	4.5	9	5;4	9	y	ENSG00000174151.14	CYB561D1	chr1	protein_coding	cytochrome b561 family, member D1
known_NIR_57	chr1	109494623	109495143	+	109494154	109495143	A5SS	ENST00000533024.5	known	0.27	4	11	4	11	y	0.5	7	7	7	7	y	1	8	0	8	0	n	1	4	0	4	0	n	ENSG00000174151.14	CYB561D1	chr1	protein_coding	cytochrome b561 family, member D1
known_NIR_58	chr1	109495180	109495756	+	109495180	109495679	A3SS	ENST00000496961.5	known	1	36	0	36	0	n	0.53	16	14	16	14	y	0.86	30	5	30	5	y	0.71	22	9	22	9	y	ENSG00000174151.14	CYB561D1	chr1	protein_coding	cytochrome b561 family, member D1
known_NIR_59	chr1	109620278	109625303	+	109621266	109625303	5pMXE	ENST00000256578.7	known	0.84	138	26	138	26	y	0.91	115	12	115	12	y	0.7	129	55	129	55	y	0.85	181	31	181	31	y	ENSG00000116337.15	AMPD2	chr1	protein_coding	adenosine monophosphate deaminase 2
known_NIR_60	chr1	109620278;109621266	109620914;109625303	+	109620278	109625303	cassetteExon	ENST00000342115.8	known	0.14	22	138	18;26	138	y	0.07	8	115	4;12	115	y	0.18	27.5	129	0;55	129	n	0.12	24	181	17;31	181	y	ENSG00000116337.15	AMPD2	chr1	protein_coding	adenosine monophosphate deaminase 2
known_NIR_61	chr1	109620278;109621266	109620914;109625662	+	109620278;109625433	109625303;109625662	MXE	ENST00000342115.8	known	0.07	12	162	18;6	138;186	y	0.02	3	140	4;2	115;165	y	0	0	142.5	0;0	129;156	n	0.04	8.5	215	17;0	181;249	n	ENSG00000116337.15	AMPD2	chr1	protein_coding	adenosine monophosphate deaminase 2
known_NIR_62	chr1	109621266	109625662	+	109621266;109625433	109625303;109625662	ES	ENST00000528667.5	known	0.05	6	106	6	26;186	y	0.02	2	88.5	2	12;165	y	0	0	105.5	0	55;156	n	0	0	140	0	31;249	n	ENSG00000116337.15	AMPD2	chr1	protein_coding	adenosine monophosphate deaminase 2
known_NIR_63	chr1	109659110	109665011	+	109659110	109661165	3pMXE	ENST00000369836.8	known	0.04	14	305	14	305	y	0.02	5	316	5	316	y	0.05	15	308	15	308	y	0.11	31	251	31	251	y	ENSG00000168765.15	GSTM4	chr1	protein_coding	glutathione S-transferase mu 4
known_NIR_64	chr1	109659110	109674747	+	109659110	109661165	3pMXE	ENST00000369836.8	known	0.32	145	305	145	305	y	0.25	106	316	106	316	y	0.37	178	308	178	308	y	0.27	93	251	93	251	y	ENSG00000168765.15	GSTM4	chr1	protein_coding	glutathione S-transferase mu 4
known_NIR_65	chr1	109659110	109674747	+	109659110	109665011	3pMXE	ENST00000326729.9	known	0.91	145	14	145	14	y	0.95	106	5	106	5	y	0.92	178	15	178	15	y	0.75	93	31	93	31	y	ENSG00000168765.15	GSTM4	chr1	protein_coding	glutathione S-transferase mu 4
known_NIR_66	chr1	109671583	109674747	+	109659110	109674747	A5SS	ENST00000336075.6	known	0	0	145	0	145	n	0	0	106	0	106	n	0	0	178	0	178	n	0.11	12	93	12	93	y	ENSG00000168765.15	GSTM4	chr1	protein_coding	glutathione S-transferase mu 4
known_NIR_67	chr1	109688737	109688991	+	109688737	109689048	A3SS	ENST00000309851.9	known	0.01	9	641	9	641	y	0	2	767	2	767	y	0.01	6	576	6	576	y	0	0	775	0	775	n	ENSG00000134184.12	GSTM1	chr1	protein_coding	glutathione S-transferase mu 1
known_NIR_68	chr1	109688737	109689225	+	109688737;109689129	109688991;109689225	ES	ENST00000369823.6	known	0.05	16	278.5	16	9;548	y	0.08	24	279	24	2;556	y	0.04	11	275	11	6;544	y	0.08	29	330	29	0;660	n	ENSG00000134184.12	GSTM1	chr1	protein_coding	glutathione S-transferase mu 1
known_NIR_69	chr1	109688737	109689225	+	109688737;109689129	109689048;109689225	ES	ENST00000309851.9	known	0.03	16	594.5	16	641;548	y	0.04	24	661.5	24	767;556	y	0.02	11	560	11	576;544	y	0.04	29	717.5	29	775;660	y	ENSG00000134184.12	GSTM1	chr1	protein_coding	glutathione S-transferase mu 1
known_NIR_70	chr1	109689325	109690271	+	109689325	109708481	A3SS	ENST00000483399.6	known	0.99	728	9	728	9	y	0.99	483	6	483	6	y	0.99	404	4	404	4	y	1	664	3	664	3	y	ENSG00000134184.12	GSTM1	chr1	protein_coding	glutathione S-transferase mu 1
known_NIR_71	chr1	109689325	109693206	+	109689325	109708481	A3SS	ENST00000483399.6	known	0.67	18	9	18	9	y	0.68	13	6	13	6	y	0.87	26	4	26	4	y	0.97	91	3	91	3	y	ENSG00000134184.12	GSTM1	chr1	protein_coding	glutathione S-transferase mu 1
known_NIR_72	chr1	109689325	109693206	+	109689325;109690366	109690271;109693206	ES	ENST00000349334.7	known	0.05	18	371	18	728;14	y	0.05	13	250.5	13	483;18	y	0.11	26	202	26	404;0	n	0.21	91	338	91	664;12	y	ENSG00000134184.12	GSTM1	chr1	protein_coding	glutathione S-transferase mu 1
known_NIR_73	chr1	109689325;109690564	109690271;109693206	+	109689325	109693206	cassetteExon	ENST00000369819.2	known	0.97	604.5	18	728;481	18	y	0.97	483	13	483;483	13	y	0.94	412	26	404;420	26	y	0.87	589	91	664;514	91	y	ENSG00000134184.12	GSTM1	chr1	protein_coding	glutathione S-transferase mu 1
known_NIR_74	chr1	109690366	109693206	+	109690366;109690564	109690454;109693206	ES	ENST00000309851.9	known	0.03	14	515.5	14	550;481	y	0.03	18	503	18	523;483	y	0	0	468.5	0	517;420	n	0.02	12	552.5	12	591;514	y	ENSG00000134184.12	GSTM1	chr1	protein_coding	glutathione S-transferase mu 1
known_NIR_75	chr1	109921994	109924060	+	109921994	109923166	A3SS	ENST00000329608.10	known	0.42	28	39	28	39	y	0	0	46	0	46	n	0.1	8	70	8	70	y	0.01	2	143	2	143	y	ENSG00000184371.13	CSF1	chr1	protein_coding	colony stimulating factor 1 (macrophage)
known_NIR_76	chr1	109921994	109924060	+	109921994;109923711	109923166;109924060	ES	ENST00000369801.1	known	0.59	28	19.5	28	39;0	n	0	0	23	0	46;0	n	0.17	8	38	8	70;6	y	0.03	2	72	2	143;1	n	ENSG00000184371.13	CSF1	chr1	protein_coding	colony stimulating factor 1 (macrophage)
known_NIR_77	chr1	109923711	109924060	+	109921994	109924060	A5SS	ENST00000420111.6	known	0	0	28	0	28	n	-	-	-	-	-	-	0.43	6	8	6	8	y	0.33	1	2	1	2	n	ENSG00000184371.13	CSF1	chr1	protein_coding	colony stimulating factor 1 (macrophage)
known_NIR_78	chr1	109925202	109926063	+	109925202	109928852	A3SS	ENST00000329608.10	known	0.12	5	38	5	38	y	0.19	8	34	8	34	y	0.19	18	75	18	75	y	0	0	77	0	77	n	ENSG00000184371.13	CSF1	chr1	protein_coding	colony stimulating factor 1 (macrophage)
known_NIR_79	chr1	110004451	110009034	+	109985172	110009034	A5SS	ENST00000369799.9	known	0.03	10	298	10	298	y	0.03	8	275	8	275	y	0.03	10	356	10	356	y	0.06	21	346	21	346	y	ENSG00000168710.17	AHCYL1	chr1	protein_coding	adenosylhomocysteinase-like 1
known_NIR_80	chr1	11022241	11023193	+	11022250	11023193	A5SS	ENST00000629725.2	known	0	0	5	0	5	n	1	4	0	4	0	n	0.21	3	11	3	11	y	0	0	6	0	6	n	ENSG00000120948.15	TARDBP	chr1	protein_coding	TAR DNA binding protein
known_NIR_81	chr1	11022250	11023263	+	11022250	11023193	3pMXE	ENST00000629725.2	known	0	0	5	0	5	n	-	-	-	-	-	-	0	0	11	0	11	n	0.45	5	6	5	6	y	ENSG00000120948.15	TARDBP	chr1	protein_coding	TAR DNA binding protein
known_NIR_82	chr1	110226178	110232911	+	110226178	110232221	A3SS	ENST00000369787.7	known	0	0	21	0	21	n	0	0	4	0	4	n	0.5	2	2	2	2	n	0.27	6	16	6	16	y	ENSG00000116396.13	KCNC4	chr1	protein_coding	potassium channel, voltage gated Shaw related subfamily C, member 4
known_NIR_83	chr1	110342268	110346308	+	110342268;110345649	110345539;110346308	ES	ENST00000369784.7	known	0.86	9	1.5	9	0;3	n	0.76	13	4	13	8;0	n	0.31	6	13.5	6	15;12	y	0.54	23	19.5	23	20;19	y	ENSG00000162775.14	RBM15	chr1	protein_coding	RNA binding motif protein 15
known_NIR_84	chr1	110406379	110407586	-	110406379	110407033	A5SS	ENST00000474861.6	known	0.96	661	24	661	24	y	0.97	797	23	797	23	y	0.96	789	31	789	31	y	0.96	754	29	754	29	y	ENSG00000134248.13	LAMTOR5	chr1	protein_coding	late endosomal/lysosomal adaptor, MAPK and MTOR activator 5
known_NIR_85	chr1	110406379	110407586	-	110406379;110407128	110407033;110407586	ES	ENST00000483260.5	known	0.97	661	17	661	24;10	y	0.98	797	20	797	23;17	y	0.97	789	20.5	789	31;10	y	0.97	754	19.5	754	29;10	y	ENSG00000134248.13	LAMTOR5	chr1	protein_coding	late endosomal/lysosomal adaptor, MAPK and MTOR activator 5
known_NIR_86	chr1	110413410	110416009	+	110412293	110416009	A5SS	ENST00000457535.5	known	0	0	10	0	10	n	0.3	7	16	7	16	y	-	-	-	-	-	-	0	0	7	0	7	n	ENSG00000224699.8	LAMTOR5-AS1	chr1	processed_transcript	LAMTOR5 antisense RNA 1
known_NIR_87	chr1	11072171;11074008	11073934;11074231	-	11072171	11074231	cassetteExon	ENST00000304457.11	known	0.99	243	3	246;240	3	y	0.96	248	11	259;237	11	y	0.98	358.5	6	358;359	6	y	0.91	337.5	33	335;340	33	y	ENSG00000171824.13	EXOSC10	chr1	protein_coding	exosome component 10
known_NIR_88	chr1	110950123	110951288	-	110950123	110963621	A5SS	ENST00000485275.2	known	0.17	11	54	11	54	y	0.33	41	85	41	85	y	0.21	35	132	35	132	y	0.38	63	104	63	104	y	ENSG00000121931.15	LRIF1	chr1	protein_coding	ligand dependent nuclear receptor interacting factor 1
known_NIR_89	chr1	110950123	110952532	-	110950123	110951288	A5SS	ENST00000369763.4	known	0.54	13	11	13	11	y	0	0	41	0	41	n	0.36	20	35	20	35	y	0.06	4	63	4	63	y	ENSG00000121931.15	LRIF1	chr1	protein_coding	ligand dependent nuclear receptor interacting factor 1
known_NIR_90	chr1	110950123	110963621	-	110950123	110952532	5pMXE	ENST00000494675.5	known	0.81	54	13	54	13	y	1	85	0	85	0	n	0.87	132	20	132	20	y	0.96	104	4	104	4	y	ENSG00000121931.15	LRIF1	chr1	protein_coding	ligand dependent nuclear receptor interacting factor 1
known_NIR_91	chr1	110950123	110963621	-	110950123;110952815	110951288;110963621	ES	ENST00000369763.4	known	0.89	54	6.5	54	11;2	y	0.72	85	33	85	41;25	y	0.81	132	31.5	132	35;28	y	0.59	104	71.5	104	63;80	y	ENSG00000121931.15	LRIF1	chr1	protein_coding	ligand dependent nuclear receptor interacting factor 1
known_NIR_92	chr1	110950123;110952815	110952532;110963621	-	110950123	110963621	cassetteExon	ENST00000485275.2	known	0.12	7.5	54	13;2	54	y	0.13	12.5	85	0;25	85	n	0.15	24	132	20;28	132	y	0.29	42	104	4;80	104	y	ENSG00000121931.15	LRIF1	chr1	protein_coding	ligand dependent nuclear receptor interacting factor 1
known_NIR_93	chr1	111137586	111140038	-	111137586	111139501	A5SS	ENST00000286692.8	known	0	0	146	0	146	n	0	0	234	0	234	n	0.04	10	232	10	232	y	0	0	201	0	201	n	ENSG00000156171.14	DRAM2	chr1	protein_coding	DNA-damage regulated autophagy modulator 2
known_NIR_94	chr1	111140307	111147642	+	111139761	111147642	A5SS	ENST00000545121.5	known	0.9	79	9	79	9	y	0.98	100	2	100	2	y	1	140	0	140	0	n	1	119	0	119	0	n	ENSG00000134255.13	CEPT1	chr1	protein_coding	choline/ethanolamine phosphotransferase 1
known_NIR_95	chr1	111619934	111691334	+	111542509	111691334	A5SS	ENST00000356415.5	known	1	29	0	29	0	n	1	10	0	10	0	n	1	69	0	69	0	n	0.64	43	24	43	24	y	ENSG00000116473.14	RAP1A	chr1	protein_coding	RAP1A, member of RAS oncogene family
known_NIR_96	chr1	112542090;112550693	112550601;112555868	-	112542090	112555868	cassetteExon	ENST00000360743.8	known	1	19.5	0	23;16	0	n	0.36	9.5	17	12;7	17	y	0.52	17	16	20;14	16	y	0.64	21	12	18;24	12	y	ENSG00000007341.18	ST7L	chr1	protein_coding	suppression of tumorigenicity 7 like
known_NIR_97	chr1	112598086	112610841	-	112598086;112600848	112600794;112610841	ES	ENST00000360743.8	known	0	0	35.5	0	26;45	n	0	0	49.5	0	53;46	n	0.38	10	16.5	10	17;16	y	0.05	4	75.5	4	86;65	y	ENSG00000007341.18	ST7L	chr1	protein_coding	suppression of tumorigenicity 7 like
known_NIR_98	chr1	112616844	112618909	-	112616895	112618909	A3SS	ENST00000360743.8	known	0.04	5	114	5	114	y	0	0	70	0	70	n	0	0	54	0	54	n	0.08	3	33	3	33	y	ENSG00000007341.18	ST7L	chr1	protein_coding	suppression of tumorigenicity 7 like
known_NIR_99	chr1	112674729	112674848	+	112674729	112674832	A3SS	ENST00000413052.6	known	0.4	38	58	38	58	y	0.48	12	13	12	13	y	0.06	1	17	1	17	n	0.75	58	19	58	19	y	ENSG00000155363.18	MOV10	chr1	protein_coding	Mov10 RISC complex RNA helicase
known_NIR_100	chr1	112675049	112686966	+	112675049	112688935	A3SS	ENST00000413052.6	known	0.07	7	90	7	90	y	0.08	6	69	6	69	y	0.15	10	58	10	58	y	0.1	12	114	12	114	y	ENSG00000155363.18	MOV10	chr1	protein_coding	Mov10 RISC complex RNA helicase
known_NIR_101	chr1	112703806	112705053	-	112703806	112705100	A5SS	ENST00000339083.11	known	0.15	117	684	117	684	y	0.11	84	683	84	683	y	0.18	118	535	118	535	y	0.18	120	538	120	538	y	ENSG00000155366.16	RHOC	chr1	protein_coding	ras homolog family member C
known_NIR_102	chr1	112703806	112707078	-	112703806	112705100	A5SS&ES	ENST00000369632.6	known	0.49	663	684	663	684	y	0.55	830	683	830	683	y	0.57	714	535	714	535	y	0.58	758	538	758	538	y	ENSG00000155366.16	RHOC	chr1	protein_coding	ras homolog family member C
known_NIR_103	chr1	112703806	112707078	-	112703806;112705168	112705100;112707078	ES	ENST00000339083.11	known	0.59	663	457.5	663	684;231	y	0.64	830	469.5	830	683;256	y	0.66	714	373	714	535;211	y	0.68	758	352	758	538;166	y	ENSG00000155366.16	RHOC	chr1	protein_coding	ras homolog family member C
known_NIR_104	chr1	112703806	112707078	-	112703806;112706252	112705100;112707078	ES	ENST00000285735.6	known	0.66	663	342	663	684;0	n	0.71	830	347	830	683;11	y	0.73	714	267.5	714	535;0	n	0.74	758	271.5	758	538;5	y	ENSG00000155366.16	RHOC	chr1	protein_coding	ras homolog family member C
known_NIR_105	chr1	112703806;112705123	112705053;112707078	-	112703806	112707078	cassetteExon	ENST00000369642.7	known	0.12	93	663	117;69	663	y	0.06	51.5	830	84;19	830	y	0.09	67	714	118;16	714	y	0.08	66	758	120;12	758	y	ENSG00000155366.16	RHOC	chr1	protein_coding	ras homolog family member C
known_NIR_106	chr1	112703806;112705123	112705100;112707078	-	112703806	112707078	cassetteExon	ENST00000369642.7	known	0.36	376.5	663	684;69	663	y	0.3	351	830	683;19	830	y	0.28	275.5	714	535;16	714	y	0.27	275	758	538;12	758	y	ENSG00000155366.16	RHOC	chr1	protein_coding	ras homolog family member C
known_NIR_107	chr1	112703806;112705168	112705053;112707078	-	112703806	112707078	cassetteExon	ENST00000369642.7	known	0.21	174	663	117;231	663	y	0.17	170	830	84;256	830	y	0.19	164.5	714	118;211	714	y	0.16	143	758	120;166	758	y	ENSG00000155366.16	RHOC	chr1	protein_coding	ras homolog family member C
known_NIR_108	chr1	112705123	112707078	-	112705168	112707078	A3SS	ENST00000339083.11	known	0.23	69	231	69	231	y	0.07	19	256	19	256	y	0.07	16	211	16	211	y	0.07	12	166	12	166	y	ENSG00000155366.16	RHOC	chr1	protein_coding	ras homolog family member C
known_NIR_109	chr1	112705123	112707078	-	112706252	112707078	A3SS	ENST00000285735.6	known	1	69	0	69	0	n	0.63	19	11	19	11	y	1	16	0	16	0	n	0.71	12	5	12	5	y	ENSG00000155366.16	RHOC	chr1	protein_coding	ras homolog family member C
known_NIR_110	chr1	112705168	112706732	-	112705168	112706833	A5SS	ENST00000369633.6	known	0.41	9	13	9	13	y	1	1	0	1	0	n	0.23	3	10	3	10	y	0.4	2	3	2	3	n	ENSG00000155366.16	RHOC	chr1	protein_coding	ras homolog family member C
known_NIR_111	chr1	112705168	112706732	-	112705168	112707078	A5SS	ENST00000339083.11	known	0.04	9	231	9	231	y	0	1	256	1	256	n	0.01	3	211	3	211	y	0.01	2	166	2	166	y	ENSG00000155366.16	RHOC	chr1	protein_coding	ras homolog family member C
known_NIR_112	chr1	112705168	112706833	-	112705168	112707078	A5SS	ENST00000339083.11	known	0.05	13	231	13	231	y	0	0	256	0	256	n	0.05	10	211	10	211	y	0.02	3	166	3	166	y	ENSG00000155366.16	RHOC	chr1	protein_coding	ras homolog family member C
known_NIR_113	chr1	112706252	112707078	-	112703806	112707078	A3SS	ENST00000369642.7	known	0	0	663	0	663	n	0.01	11	830	11	830	y	0	0	714	0	714	n	0.01	5	758	5	758	y	ENSG00000155366.16	RHOC	chr1	protein_coding	ras homolog family member C
known_NIR_114	chr1	112706252	112707078	-	112705168	112707078	A3SS	ENST00000339083.11	known	0	0	231	0	231	n	0.04	11	256	11	256	y	0	0	211	0	211	n	0.03	5	166	5	166	y	ENSG00000155366.16	RHOC	chr1	protein_coding	ras homolog family member C
known_NIR_115	chr1	11274060	11294873	+	11274060	11285644	3pMXE	ENST00000376810.5	known	0	0	55	0	55	n	0.19	5	21	5	21	y	0	0	70	0	70	n	0.04	4	85	4	85	y	ENSG00000120942.13	UBIAD1	chr1	protein_coding	UbiA prenyltransferase domain containing 1
known_NIR_116	chr1	112929352	112955276	-	112929352	112956035	A5SS	ENST00000369626.7	known	0	0	214	0	214	n	0	0	190	0	190	n	0.01	2	343	2	343	y	0.01	4	314	4	314	y	ENSG00000155380.11	SLC16A1	chr1	protein_coding	solute carrier family 16 (monocarboxylate transporter), member 1
known_NIR_117	chr1	113681336	113682897	+	113681336	113682212	3pMXE	ENST00000369617.8	known	0	0	20	0	20	n	-	-	-	-	-	-	-	-	-	-	-	-	0.29	5	12	5	12	y	ENSG00000081026.18	MAGI3	chr1	protein_coding	membrane associated guanylate kinase, WW and PDZ domain containing 3
known_NIR_118	chr1	113758848	113759023	-	113758733	113759023	A3SS	ENST00000369598.5	known	0.2	8	32	8	32	y	0.28	10	26	10	26	y	0.04	3	69	3	69	y	0.41	23	33	23	33	y	ENSG00000116793.15	PHTF1	chr1	protein_coding	putative homeodomain transcription factor 1
known_NIR_119	chr1	113900400	113901236	-	113900400	113904605	A5SS	ENST00000369567.5	known	1	68	0	68	0	n	0.94	101	7	101	7	y	0.89	82	10	82	10	y	0.94	96	6	96	6	y	ENSG00000134262.12	AP4B1	chr1	protein_coding	adaptor-related protein complex 4, beta 1 subunit
known_NIR_120	chr1	113902862	113904605	-	113900400	113904605	A3SS	ENST00000369567.5	known	1	61	0	61	0	n	0.86	43	7	43	7	y	0.82	47	10	47	10	y	0.92	66	6	66	6	y	ENSG00000134262.12	AP4B1	chr1	protein_coding	adaptor-related protein complex 4, beta 1 subunit
known_NIR_121	chr1	113957184	113958066	+	113957286	113958066	A5SS	ENST00000426820.6	known	0	0	13	0	13	n	0	0	23	0	23	n	0.16	7	37	7	37	y	0.09	9	87	9	87	y	ENSG00000163349.21	HIPK1	chr1	protein_coding	homeodomain interacting protein kinase 1
known_NIR_122	chr1	114397860	114399457	-	114397860;114397990	114397940;114399457	ES	ENST00000358465.6	known	0.33	7	14	7	19;9	y	0.52	23	21	23	21;21	y	0.46	52	60.5	52	72;49	y	0.14	6	36.5	6	42;31	y	ENSG00000197323.10	TRIM33	chr1	protein_coding	tripartite motif containing 33
known_NIR_123	chr1	114736855;114737563	114737471;114737963	-	114736855	114737963	cassetteExon	ENST00000339438.10	known	0.1	100	881	88;112	881	y	0.08	132	1502	131;133	1502	y	0.07	145	1851	146;144	1851	y	0.06	126.5	1968	103;150	1968	y	ENSG00000009307.15	CSDE1	chr1	protein_coding	cold shock domain containing E1, RNA-binding
known_NIR_124	chr1	114738072	114749821	-	114738072;114739890	114739692;114749821	ES	ENST00000339438.10	known	0.04	30	674.5	30	947;402	y	0.05	50	1046.5	50	1355;738	y	0.03	43	1570	43	1874;1266	y	0.04	54	1452.5	54	1785;1120	y	ENSG00000009307.15	CSDE1	chr1	protein_coding	cold shock domain containing E1, RNA-binding
known_NIR_125	chr1	114738072;114750207	114749821;114757925	-	114738072;114739890	114739692;114757925	MXE	ENST00000261443.9	known	0.35	267	493	30;504	947;39	y	0.34	359.5	686	50;669	1355;17	y	0.33	461	956.5	43;879	1874;39	y	0.34	469	908.5	54;884	1785;32	y	ENSG00000009307.15	CSDE1	chr1	protein_coding	cold shock domain containing E1, RNA-binding
known_NIR_126	chr1	114739890	114741527	-	114739890	114757925	A5SS	ENST00000261443.9	known	0	0	39	0	39	n	0.37	10	17	10	17	y	0	0	39	0	39	n	0.2	8	32	8	32	y	ENSG00000009307.15	CSDE1	chr1	protein_coding	cold shock domain containing E1, RNA-binding
known_NIR_127	chr1	114739890	114757925	-	114739890;114750207	114749821;114757925	ES	ENST00000339438.10	known	0.08	39	453	39	402;504	y	0.02	17	703.5	17	738;669	y	0.04	39	1072.5	39	1266;879	y	0.03	32	1002	32	1120;884	y	ENSG00000009307.15	CSDE1	chr1	protein_coding	cold shock domain containing E1, RNA-binding
known_NIR_128	chr1	114739890;114741673	114741527;114749821	-	114739890	114749821	cassetteExon	ENST00000339438.10	known	0.02	8	402	0;16	402	n	0.02	17.5	738	10;25	738	y	0	1.5	1266	0;3	1266	n	0.01	12	1120	8;16	1120	y	ENSG00000009307.15	CSDE1	chr1	protein_coding	cold shock domain containing E1, RNA-binding
known_NIR_129	chr1	114741673	114749821	-	114738072	114749821	A3SS	ENST00000530886.5	known	0.35	16	30	16	30	y	0.33	25	50	25	50	y	0.07	3	43	3	43	y	0.23	16	54	16	54	y	ENSG00000009307.15	CSDE1	chr1	protein_coding	cold shock domain containing E1, RNA-binding
known_NIR_130	chr1	114780215	114780449	-	114780215	114780437	A5SS	ENST00000369528.9	known	1	28	0	28	0	n	0.88	100	14	100	14	y	0.93	81	6	81	6	y	1	76	0	76	0	n	ENSG00000052723.11	SIKE1	chr1	protein_coding	suppressor of IKBKE 1
known_NIR_131	chr1	116027022	116031403	+	116027022	116031366	A3SS	ENST00000369503.8	known	-	-	-	-	-	-	1	4	0	4	0	n	-	-	-	-	-	-	0.8	12	3	12	3	y	ENSG00000163393.12	SLC22A15	chr1	protein_coding	solute carrier family 22, member 15
known_NIR_132	chr1	116374241	116384014	+	116373523	116384014	A5SS	ENST00000295598.9	known	0.05	19	336	19	336	y	0.07	25	338	25	338	y	0.04	16	353	16	353	y	0	0	462	0	462	n	ENSG00000163399.15	ATP1A1	chr1	protein_coding	ATPase, Na+/K+ transporting, alpha 1 polypeptide
known_NIR_133	chr1	11654952	11655670	+	11654952	11655328	A3SS	ENST00000376770.5	known	0	0	3	0	3	n	0.4	4	6	4	6	y	-	-	-	-	-	-	-	-	-	-	-	-	ENSG00000132879.13	FBXO44	chr1	protein_coding	F-box protein 44
known_NIR_134	chr1	11658364	11658736	+	11658628	11658736	A5SS&ES	ENST00000376770.5	known	1	19	0	19	0	n	0.88	43	6	43	6	y	0.53	23	20	23	20	y	0.56	40	31	40	31	y	ENSG00000132879.13	FBXO44	chr1	protein_coding	F-box protein 44
known_NIR_135	chr1	116604025	116607942	-	116604025;116606551	116606492;116607942	ES	ENST00000369483.5	known	0.8	107	26.5	107	19;34	y	0.83	68	13.5	68	10;17	y	0.89	162	19.5	162	5;34	y	0.85	193	34.5	193	28;41	y	ENSG00000143061.17	IGSF3	chr1	protein_coding	immunoglobulin superfamily, member 3
known_NIR_136	chr1	11676140	11676809	-	11676140	11676848	A5SS	ENST00000235310.7	known	0.07	46	639	46	639	y	0.08	62	679	62	679	y	0.09	63	674	63	674	y	0.06	34	555	34	555	y	ENSG00000116670.14	MAD2L2	chr1	protein_coding	MAD2 mitotic arrest deficient-like 2 (yeast)
known_NIR_137	chr1	11736235;11745837	11745803;11747440	+	11736235	11747440	cassetteExon	ENST00000376637.7	known	1	460	0	469;451	0	n	1	366.5	0	381;352	0	n	1	382	0	387;377	0	n	0.97	483.5	15	479;488	15	y	ENSG00000177674.15	AGTRAP	chr1	protein_coding	angiotensin II receptor-associated protein
known_NIR_138	chr1	11736235;11745837	11745803;11748415	+	11736235;11747545	11747440;11748415	MXE	ENST00000376637.7	known	0.48	240	259.5	469;11	0;519	n	0.4	190.5	285.5	381;0	0;571	n	0.43	193.5	251.5	387;0	0;503	n	0.48	243.5	263.5	479;8	15;512	y	ENSG00000177674.15	AGTRAP	chr1	protein_coding	angiotensin II receptor-associated protein
known_NIR_139	chr1	11736235;11746223	11745803;11747440	+	11736235	11747440	cassetteExon	ENST00000376637.7	known	1	276.5	0	469;84	0	n	1	241.5	0	381;102	0	n	1	225	0	387;63	0	n	0.95	276	15	479;73	15	y	ENSG00000177674.15	AGTRAP	chr1	protein_coding	angiotensin II receptor-associated protein
known_NIR_140	chr1	11745837	11746127	+	11745837	11748415	A3SS	ENST00000510878.1	known	0.91	115	11	115	11	y	1	81	0	81	0	n	1	72	0	72	0	n	0.89	62	8	62	8	y	ENSG00000177674.15	AGTRAP	chr1	protein_coding	angiotensin II receptor-associated protein
known_NIR_141	chr1	11745837	11747440	+	11745837;11746223	11746127;11747440	ES	ENST00000400895.6	known	0.82	451	99.5	451	115;84	y	0.79	352	91.5	352	81;102	y	0.85	377	67.5	377	72;63	y	0.88	488	67.5	488	62;73	y	ENSG00000177674.15	AGTRAP	chr1	protein_coding	angiotensin II receptor-associated protein
known_NIR_142	chr1	11745837	11748415	+	11745837;11747545	11747440;11748415	ES	ENST00000376629.8	known	0.02	11	485	11	451;519	y	0	0	461.5	0	352;571	n	0	0	440	0	377;503	n	0.02	8	500	8	488;512	y	ENSG00000177674.15	AGTRAP	chr1	protein_coding	angiotensin II receptor-associated protein
known_NIR_143	chr1	11748610	11750077	+	11748589	11750077	A5SS	ENST00000376637.7	known	0.78	402	112	402	112	y	0.82	301	68	301	68	y	0.77	271	79	271	79	y	0.88	304	42	304	42	y	ENSG00000177674.15	AGTRAP	chr1	protein_coding	angiotensin II receptor-associated protein
known_NIR_144	chr1	11803129	11805888	-	11803129	11803405	5pMXE	ENST00000376583.7	known	0	0	5	0	5	n	0	0	14	0	14	n	0.44	8	10	8	10	y	0	0	9	0	9	n	ENSG00000177000.10	MTHFR	chr1	protein_coding	methylenetetrahydrofolate reductase (NAD(P)H)
known_NIR_145	chr1	119033359	119034095	-	119033388	119034095	A3SS	ENST00000369426.9	known	0.74	40	14	40	14	y	0.95	54	3	54	3	y	0.82	58	13	58	13	y	0.95	104	5	104	5	y	ENSG00000116874.11	WARS2	chr1	protein_coding	tryptophanyl tRNA synthetase 2, mitochondrial
known_NIR_146	chr1	11980484;11982114	11981970;11989165	+	11980484	11989165	cassetteExon	ENST00000444836.5	known	0.94	200.5	12	123;278	12	y	0.92	183.5	17	131;236	17	y	0.89	192.5	25	106;279	25	y	0.92	286.5	24	172;401	24	y	ENSG00000116688.16	MFN2	chr1	protein_coding	mitofusin 2
known_NIR_147	chr1	119996746	119996997	-	119987082	119996997	A3SS	ENST00000256646.6	known	0	0	162	0	162	n	0.02	3	118	3	118	y	0	0	46	0	46	n	0	0	211	0	211	n	ENSG00000134250.17	NOTCH2	chr1	protein_coding	notch 2
known_NIR_148	chr1	120805765;120807709	120807607;120808545	+	120805765	120808545	cassetteExon	ENST00000615145.4	known	0.07	3.5	48	2;5	48	y	0.11	9.5	78	0;19	78	n	0.18	20.5	91	1;40	91	n	0.11	9	72	2;16	72	y	ENSG00000273136.5	NBPF26	chr1	protein_coding	neuroblastoma breakpoint family, member 26
known_NIR_149	chr1	120823360	120830416	+	120823360	120833603	A3SS	ENST00000615145.4	known	0	0	41	0	41	n	0.17	1	5	1	5	n	0.08	3	35	3	35	y	0.03	1	36	1	36	n	ENSG00000273136.5	NBPF26	chr1	protein_coding	neuroblastoma breakpoint family, member 26
known_NIR_150	chr1	120823360;120833775	120833603;120834495	+	120823360;120832160	120830416;120834495	MXE	ENST00000611702.4	known	0.96	117.5	5	41;194	0;10	n	0.91	74.5	7.5	5;144	1;14	n	0.93	120	8.5	35;205	3;14	y	0.92	157.5	14.5	36;279	1;28	n	ENSG00000273136.5	NBPF26	chr1	protein_coding	neuroblastoma breakpoint family, member 26
known_NIR_151	chr1	120824146	120829764	+	120824146	120836517	A3SS	ENST00000619748.4	known	0.33	60	123	60	123	y	0.34	69	135	69	135	y	0.36	153	269	153	269	y	0.31	99	225	99	225	y	ENSG00000273136.5	NBPF26	chr1	protein_coding	neuroblastoma breakpoint family, member 26
known_NIR_152	chr1	120824146	120836517	+	120824146	120824866	A3SS&ES	ENST00000617913.4	known	0.46	123	145	123	145	y	0.51	135	132	135	132	y	0.51	269	255	269	255	y	0.53	225	200	225	200	y	ENSG00000273136.5	NBPF26	chr1	protein_coding	neuroblastoma breakpoint family, member 26
known_NIR_153	chr1	120824146;120829815	120829764;120830416	+	120824146;120824917	120824866;120830416	MXE	ENST00000617913.4	known	0.22	33.5	119	60;7	145;93	y	0.28	39.5	103	69;10	132;74	y	0.33	92.5	191.5	153;32	255;128	y	0.27	61	162	99;23	200;124	y	ENSG00000273136.5	NBPF26	chr1	protein_coding	neuroblastoma breakpoint family, member 26
known_NIR_154	chr1	120824917	120830416	+	120823360	120830416	A5SS	ENST00000611287.4	known	1	93	0	93	0	n	0.99	74	1	74	1	n	0.98	128	3	128	3	y	0.99	124	1	124	1	n	ENSG00000273136.5	NBPF26	chr1	protein_coding	neuroblastoma breakpoint family, member 26
known_NIR_155	chr1	120829815	120830416	+	120823360	120830416	A5SS	ENST00000611287.4	known	1	7	0	7	0	n	0.91	10	1	10	1	n	0.91	32	3	32	3	y	0.96	23	1	23	1	n	ENSG00000273136.5	NBPF26	chr1	protein_coding	neuroblastoma breakpoint family, member 26
known_NIR_156	chr1	120832160	120834495	+	120833775	120834495	A5SS&ES	ENST00000615145.4	known	0.05	10	194	10	194	y	0.09	14	144	14	144	y	0.06	14	205	14	205	y	0.09	28	279	28	279	y	ENSG00000273136.5	NBPF26	chr1	protein_coding	neuroblastoma breakpoint family, member 26
known_NIR_157	chr1	120832160;120834546	120834495;120837169	+	120832160;120836568	120832875;120837169	MXE	ENST00000620612.4	known	0.48	79	84	10;148	104;64	y	0.44	59	75.5	14;104	103;48	y	0.33	69.5	143	14;125	203;83	y	0.37	96	164	28;164	227;101	y	ENSG00000273136.5	NBPF26	chr1	protein_coding	neuroblastoma breakpoint family, member 26
known_NIR_158	chr1	120832160;120834802	120834495;120836517	+	120832160;120833775	120832875;120836517	MXE	ENST00000620612.4	known	0.08	6.5	70.5	10;3	104;37	y	0.12	9	63.5	14;4	103;24	y	0.07	10	136	14;6	203;69	y	0.1	19	168.5	28;10	227;110	y	ENSG00000273136.5	NBPF26	chr1	protein_coding	neuroblastoma breakpoint family, member 26
known_NIR_159	chr1	120832983	120833603	+	120823360	120833603	A5SS	ENST00000615145.4	known	0.79	153	41	153	41	y	0.96	115	5	115	5	y	0.9	300	35	300	35	y	0.9	323	36	323	36	y	ENSG00000273136.5	NBPF26	chr1	protein_coding	neuroblastoma breakpoint family, member 26
known_NIR_160	chr1	120832983	120833603	+	120832983	120840350	A3SS	ENST00000611287.4	known	1	153	0	153	0	n	1	115	0	115	0	n	0.99	300	3	300	3	y	0.99	323	4	323	4	y	ENSG00000273136.5	NBPF26	chr1	protein_coding	neuroblastoma breakpoint family, member 26
known_NIR_161	chr1	120833775;120834802	120834495;120836517	+	120833775	120836517	cassetteExon	ENST00000620612.4	known	0.73	98.5	37	194;3	37	y	0.76	74	24	144;4	24	y	0.6	105.5	69	205;6	69	y	0.57	144.5	110	279;10	110	y	ENSG00000273136.5	NBPF26	chr1	protein_coding	neuroblastoma breakpoint family, member 26
known_NIR_162	chr1	120833775;120836568	120836517;120837169	+	120833775;120834546	120834495;120837169	MXE	ENST00000615145.4	known	0.23	50.5	171	37;64	194;148	y	0.23	36	124	24;48	144;104	y	0.32	76	165	69;83	205;125	y	0.32	105.5	221.5	110;101	279;164	y	ENSG00000273136.5	NBPF26	chr1	protein_coding	neuroblastoma breakpoint family, member 26
known_NIR_163	chr1	120834546	120834630	+	120834546	120837169	A3SS	ENST00000615145.4	known	0.14	24	148	24	148	y	0.19	24	104	24	104	y	0.19	29	125	29	125	y	0.21	44	164	44	164	y	ENSG00000273136.5	NBPF26	chr1	protein_coding	neuroblastoma breakpoint family, member 26
known_NIR_164	chr1	120834546	120837169	+	120836568	120837169	A5SS&ES	ENST00000619748.4	known	0.7	148	64	148	64	y	0.68	104	48	104	48	y	0.6	125	83	125	83	y	0.62	164	101	164	101	y	ENSG00000273136.5	NBPF26	chr1	protein_coding	neuroblastoma breakpoint family, member 26
known_NIR_165	chr1	120834802	120836517	+	120824146	120836517	A5SS	ENST00000619748.4	known	0.02	3	123	3	123	y	0.03	4	135	4	135	y	0.02	6	269	6	269	y	0.04	10	225	10	225	y	ENSG00000273136.5	NBPF26	chr1	protein_coding	neuroblastoma breakpoint family, member 26
known_NIR_166	chr1	120913450	120952439	+	120913450	121001000	A3SS	ENST00000617702.1	known	1	246	0	246	0	n	1	334	0	334	0	n	0.96	230	9	230	9	y	1	181	0	181	0	n	ENSG00000226067.6	LINC00623	chr1	lincRNA	long intergenic non-protein coding RNA 623
known_NIR_167	chr1	120913450	120952439	+	120913450	121006847	A3SS	ENST00000614062.1	known	1	246	0	246	0	n	0.98	334	8	334	8	y	1	230	0	230	0	n	0.99	181	2	181	2	y	ENSG00000226067.6	LINC00623	chr1	lincRNA	long intergenic non-protein coding RNA 623
known_NIR_168	chr1	121181348	121183458	-	121181348	121183338	A5SS	ENST00000369390.7	known	0	0	51	0	51	n	0.08	8	87	8	87	y	0	0	96	0	96	n	0.05	5	87	5	87	y	ENSG00000188610.12	FAM72B	chr1	protein_coding	family with sequence similarity 72, member B
known_NIR_169	chr1	121181348	121185318	-	121181348	121183338	5pMXE	ENST00000369390.7	known	0	0	51	0	51	n	0	0	87	0	87	n	0	0	96	0	96	n	0.02	2	87	2	87	y	ENSG00000188610.12	FAM72B	chr1	protein_coding	family with sequence similarity 72, member B
known_NIR_170	chr1	121187513	121284803	+	121187513	121365293	A3SS	ENST00000304465.7	known	0.9	82	9	82	9	y	0.68	89	42	89	42	y	1	110	0	110	0	n	0.91	177	18	177	18	y	ENSG00000171943.11	SRGAP2C	chr1	protein_coding	SLIT-ROBO Rho GTPase activating protein 2C
known_NIR_171	chr1	121324640	121365293	+	121187513	121365293	A5SS	ENST00000304465.7	known	0.88	65	9	65	9	y	0.53	47	42	47	42	y	1	84	0	84	0	n	0.84	94	18	94	18	y	ENSG00000171943.11	SRGAP2C	chr1	protein_coding	SLIT-ROBO Rho GTPase activating protein 2C
known_NIR_172	chr1	121374954	121382704	+	121374954	121382701	A3SS	ENST00000367123.7	known	0.47	40	45	40	45	y	0.24	21	68	21	68	y	0.41	80	113	80	113	y	0.35	62	116	62	116	y	ENSG00000171943.11	SRGAP2C	chr1	protein_coding	SLIT-ROBO Rho GTPase activating protein 2C
known_NIR_173	chr1	1217804	1218458	-	1217688	1218458	A3SS	ENST00000360001.10	known	0.04	32	692	32	692	y	0.08	49	548	49	548	y	0.11	77	625	77	625	y	0.06	56	809	56	809	y	ENSG00000078808.16	SDF4	chr1	protein_coding	stromal cell derived factor 4
known_NIR_174	chr1	1263386	1264783	-	1263386	1267733	A5SS	ENST00000347370.6	known	0	0	19	0	19	n	0.15	6	35	6	35	y	0.71	15	6	15	6	y	0.5	8	8	8	8	y	ENSG00000160087.20	UBE2J2	chr1	protein_coding	ubiquitin-conjugating enzyme E2, J2
known_NIR_175	chr1	1263386	1264783	-	1263386	1273666	A5SS	ENST00000400929.6	known	0	0	34	0	34	n	0.26	6	17	6	17	y	0.52	15	14	15	14	y	0.22	8	28	8	28	y	ENSG00000160087.20	UBE2J2	chr1	protein_coding	ubiquitin-conjugating enzyme E2, J2
known_NIR_176	chr1	1263386	1267862	-	1263386	1267733	A5SS	ENST00000347370.6	known	0.93	259	19	259	19	y	0.82	163	35	163	35	y	0.94	102	6	102	6	y	0.95	155	8	155	8	y	ENSG00000160087.20	UBE2J2	chr1	protein_coding	ubiquitin-conjugating enzyme E2, J2
known_NIR_177	chr1	1263386	1273666	-	1263386	1267862	A5SS&ES	ENST00000360466.6	known	0.12	34	259	34	259	y	0.09	17	163	17	163	y	0.12	14	102	14	102	y	0.15	28	155	28	155	y	ENSG00000160087.20	UBE2J2	chr1	protein_coding	ubiquitin-conjugating enzyme E2, J2
known_NIR_178	chr1	1263386	1273666	-	1263386;1267992	1267733;1273666	ES	ENST00000347370.6	known	0.23	34	114.5	34	19;210	y	0.16	17	92.5	17	35;150	y	0.14	14	84	14	6;162	y	0.27	28	77	28	8;146	y	ENSG00000160087.20	UBE2J2	chr1	protein_coding	ubiquitin-conjugating enzyme E2, J2
known_NIR_179	chr1	1263386	1273666	-	1263386;1267992	1267862;1273666	ES	ENST00000349431.10	known	0.13	34	234.5	34	259;210	y	0.1	17	156.5	17	163;150	y	0.1	14	132	14	102;162	y	0.16	28	150.5	28	155;146	y	ENSG00000160087.20	UBE2J2	chr1	protein_coding	ubiquitin-conjugating enzyme E2, J2
known_NIR_180	chr1	1263386;1264830	1264783;1267862	-	1263386	1267862	cassetteExon	ENST00000349431.10	known	0	0	259	0;0	259	n	0.02	3	163	6;0	163	n	0.14	16	102	15;17	102	y	0.03	4	155	8;0	155	n	ENSG00000160087.20	UBE2J2	chr1	protein_coding	ubiquitin-conjugating enzyme E2, J2
known_NIR_181	chr1	1267992	1273499	-	1267992	1273666	A5SS	ENST00000347370.6	known	0.1	23	210	23	210	y	0.04	7	150	7	150	y	0.01	2	162	2	162	y	0.06	9	146	9	146	y	ENSG00000160087.20	UBE2J2	chr1	protein_coding	ubiquitin-conjugating enzyme E2, J2
known_NIR_182	chr1	1294628	1295447	-	1294628;1294816	1294718;1295447	ES	ENST00000354700.9	known	0.61	48	30.5	48	40;21	y	0.46	37	43.5	37	57;30	y	0.37	24	40.5	24	44;37	y	0.37	39	65.5	39	61;70	y	ENSG00000131584.18	ACAP3	chr1	protein_coding	ArfGAP with coiled-coil, ankyrin repeat and PH domains 3
known_NIR_183	chr1	1314105	1314301	-	1313921	1314301	A3SS	ENST00000540437.5	known	0	0	183	0	183	n	0	0	132	0	132	n	0.07	5	62	5	62	y	0.05	11	201	11	201	y	ENSG00000127054.18	CPSF3L	chr1	protein_coding	cleavage and polyadenylation specific factor 3-like
known_NIR_184	chr1	1321093	1321908	-	1321093	1324581	A5SS	ENST00000618806.4	known	0	0	187	0	187	n	0	0	48	0	48	n	0.05	5	90	5	90	y	0.04	6	140	6	140	y	ENSG00000127054.18	CPSF3L	chr1	protein_coding	cleavage and polyadenylation specific factor 3-like
known_NIR_185	chr1	1321093	1323181	-	1321093	1321908	A5SS&ES	ENST00000540437.5	known	1	15	0	15	0	n	1	8	0	8	0	n	0.29	2	5	2	5	n	0.76	19	6	19	6	y	ENSG00000127054.18	CPSF3L	chr1	protein_coding	cleavage and polyadenylation specific factor 3-like
known_NIR_186	chr1	1321093	1324581	-	1321093;1323287	1323181;1324581	ES	ENST00000545578.5	known	0.93	187	14	187	15;13	y	0.85	48	8.5	48	8;9	y	0.95	90	4.5	90	2;7	y	0.9	140	15	140	19;11	y	ENSG00000127054.18	CPSF3L	chr1	protein_coding	cleavage and polyadenylation specific factor 3-like
known_NIR_187	chr1	1321093	1324581	-	1323287	1324581	A3SS&ES	ENST00000620829.4	known	0.94	187	13	187	13	y	0.84	48	9	48	9	y	0.93	90	7	90	7	y	0.93	140	11	140	11	y	ENSG00000127054.18	CPSF3L	chr1	protein_coding	cleavage and polyadenylation specific factor 3-like
known_NIR_188	chr1	1338653	1339287	-	1338653	1339362	A5SS	ENST00000378891.9	known	0.48	162	173	162	173	y	0.46	161	188	161	188	y	0.36	98	175	98	175	y	0.54	175	147	175	147	y	ENSG00000107404.17	DVL1	chr1	protein_coding	dishevelled segment polarity protein 1
known_NIR_189	chr1	1374790	1374997	-	1374790	1375075	A5SS	ENST00000321751.9	known	0.87	326	47	326	47	y	0.88	295	40	295	40	y	0.9	289	31	289	31	y	0.95	283	16	283	16	y	ENSG00000175756.13	AURKAIP1	chr1	protein_coding	aurora kinase A interacting protein 1
known_NIR_190	chr1	1374790	1374997	-	1374790	1375154	A5SS	ENST00000338338.9	known	0.4	326	495	326	495	y	0.41	295	421	295	421	y	0.48	289	316	289	316	y	0.48	283	304	283	304	y	ENSG00000175756.13	AURKAIP1	chr1	protein_coding	aurora kinase A interacting protein 1
known_NIR_191	chr1	1374790	1375075	-	1374790	1375154	A5SS	ENST00000338338.9	known	0.09	47	495	47	495	y	0.09	40	421	40	421	y	0.09	31	316	31	316	y	0.05	16	304	16	304	y	ENSG00000175756.13	AURKAIP1	chr1	protein_coding	aurora kinase A interacting protein 1
known_NIR_192	chr1	13749487;13769173	13769118;13773078	+	13749487	13773078	cassetteExon	ENST00000311066.9	known	0	0	15	0;0	15	n	0.47	4.5	5	3;6	5	y	0	0	8	0;0	8	n	-	-	-	-	-	-	ENSG00000116731.22	PRDM2	chr1	protein_coding	PR domain containing 2, with ZNF domain
known_NIR_193	chr1	1392803	1393396	-	1390865	1393396	A3SS	ENST00000400809.7	known	0.61	77	50	77	50	y	0.72	54	21	54	21	y	0.87	149	22	149	22	y	0.81	95	23	95	23	y	ENSG00000221978.11	CCNL2	chr1	protein_coding	cyclin L2
known_NIR_194	chr1	143956481	143968924	-	143956481;143964979	143964855;143968924	ES	ENST00000584486.5	known	0	0	19	0	27;11	n	0.04	3	76	3	97;55	y	0.3	17	40.5	17	61;20	y	0.08	4	44	4	63;25	y	ENSG00000263513.5	FAM72C	chr1	protein_coding	family with sequence similarity 72, member C
known_NIR_195	chr1	144245315	144245686	-	144227379	144245686	A3SS	ENST00000452399.5	known	1	2	0	2	0	n	0.12	2	14	2	14	y	0	0	4	0	4	n	0	0	19	0	19	n	ENSG00000232527.7	RP11-14N7.2	chr1	lincRNA		--
known_NIR_196	chr1	144440295	144440402	-	144440295	144448775	A5SS	ENST00000581897.6	known	0	0	15	0	15	n	0.26	5	14	5	14	y	0	0	61	0	61	n	0.53	31	27	31	27	y	ENSG00000266338.6	NBPF15	chr1	protein_coding	neuroblastoma breakpoint family, member 15
known_NIR_197	chr1	144442920	144448775	-	144440295	144448775	A3SS	ENST00000581897.6	known	0.35	8	15	8	15	y	0.22	4	14	4	14	y	0.08	5	61	5	61	y	0.21	7	27	7	27	y	ENSG00000266338.6	NBPF15	chr1	protein_coding	neuroblastoma breakpoint family, member 15
known_NIR_198	chr1	144914754	144955439	-	144914754	145092835	A5SS	ENST00000619678.1	known	0.82	68	15	68	15	y	0.52	55	50	55	50	y	0.85	64	11	64	11	y	0.76	106	34	106	34	y	ENSG00000196369.10	SRGAP2B	chr1	protein_coding	SLIT-ROBO Rho GTPase activating protein 2B
known_NIR_199	chr1	144995200	145092835	-	144914754	145092835	A3SS	ENST00000619678.1	known	0.81	63	15	63	15	y	0.66	96	50	96	50	y	0.9	96	11	96	11	y	0.8	136	34	136	34	y	ENSG00000196369.10	SRGAP2B	chr1	protein_coding	SLIT-ROBO Rho GTPase activating protein 2B
known_NIR_200	chr1	145171185	145214677	-	145164638	145214677	A3SS	ENST00000621798.4	known	0	0	28	0	28	n	0.71	5	2	5	2	n	0.76	16	5	16	5	y	-	-	-	-	-	-	ENSG00000272419.5	RP11-403I13.8	chr1	processed_transcript		--
known_NIR_201	chr1	145171185	145215639	-	145214731	145215639	A3SS&ES	ENST00000621798.4	known	0	0	89	0	89	n	0.24	12	39	12	39	y	0.35	25	47	25	47	y	0.47	20	23	20	23	y	ENSG00000272419.5	RP11-403I13.8	chr1	processed_transcript		--
known_NIR_202	chr1	145171185;145214731	145214677;145215639	-	145171185	145215639	cassetteExon	ENST00000606004.5	known	1	44.5	0	0;89	0	n	0.65	22	12	5;39	12	y	0.56	31.5	25	16;47	25	y	0.37	11.5	20	0;23	20	n	ENSG00000272419.5	RP11-403I13.8	chr1	processed_transcript		--
known_NIR_203	chr1	145201301	145214677	-	145164638	145214677	A3SS	ENST00000621798.4	known	0.36	16	28	16	28	y	0.5	2	2	2	2	n	0	0	5	0	5	n	1	5	0	5	0	n	ENSG00000272419.5	RP11-403I13.8	chr1	processed_transcript		--
known_NIR_204	chr1	145201301	145215639	-	145171185	145215639	A3SS	ENST00000606004.5	known	-	-	-	-	-	-	0.08	1	12	1	12	n	0.19	6	25	6	25	y	0.2	5	20	5	20	y	ENSG00000272419.5	RP11-403I13.8	chr1	processed_transcript		--
known_NIR_205	chr1	145201301	145215639	-	145214731	145215639	A3SS&ES	ENST00000621798.4	known	0	0	89	0	89	n	0.03	1	39	1	39	n	0.11	6	47	6	47	y	0.18	5	23	5	23	y	ENSG00000272419.5	RP11-403I13.8	chr1	processed_transcript		--
known_NIR_206	chr1	145201301;145214731	145214677;145215639	-	145201301	145215639	cassetteExon	ENST00000616993.1	known	1	52.5	0	16;89	0	n	0.95	20.5	1	2;39	1	n	0.8	23.5	6	0;47	6	n	0.74	14	5	5;23	5	y	ENSG00000272419.5	RP11-403I13.8	chr1	processed_transcript		--
known_NIR_207	chr1	145291769	145292381	-	145291769	145297139	A5SS	ENST00000622803.4	known	0.58	39	28	39	28	y	0.65	87	47	87	47	y	0.5	59	60	59	60	y	0.5	77	76	77	76	y	ENSG00000162825.16	NBPF20	chr1	protein_coding	neuroblastoma breakpoint family, member 20
known_NIR_208	chr1	145291769	145336814	-	145291769	145292381	A5SS&ES	ENST00000620821.1	known	0.6	58	39	58	39	y	0.45	70	87	70	87	y	0.62	96	59	96	59	y	0.63	129	77	129	77	y	ENSG00000162825.16	NBPF20	chr1	protein_coding	neuroblastoma breakpoint family, member 20
known_NIR_209	chr1	145291769	145336814	-	145291769	145297139	A5SS&ES	ENST00000622803.4	known	0.67	58	28	58	28	y	0.6	70	47	70	47	y	0.62	96	60	96	60	y	0.63	129	76	129	76	y	ENSG00000162825.16	NBPF20	chr1	protein_coding	neuroblastoma breakpoint family, member 20
known_NIR_210	chr1	145291769;145292489	145292381;145385194	-	145291769;145384479	145336814;145385194	MXE	ENST00000594479.7	known	0.78	474.5	134	39;910	58;210	y	0.78	487.5	141.5	87;888	70;213	y	0.81	995.5	229	59;1932	96;362	y	0.84	1483.5	280	77;2890	129;431	y	ENSG00000162825.16	NBPF20	chr1	protein_coding	neuroblastoma breakpoint family, member 20
known_NIR_211	chr1	145292489	145293204	-	145292489	145385194	A5SS	ENST00000620821.1	known	0.05	44	910	44	910	y	0.06	53	888	53	888	y	0.05	107	1932	107	1932	y	0.04	122	2890	122	2890	y	ENSG00000162825.16	NBPF20	chr1	protein_coding	neuroblastoma breakpoint family, member 20
known_NIR_212	chr1	145296510	145297139	-	145291769	145297139	A3SS	ENST00000622803.4	known	0.81	117	28	117	28	y	0.62	77	47	77	47	y	0.74	172	60	172	60	y	0.73	210	76	210	76	y	ENSG00000162825.16	NBPF20	chr1	protein_coding	neuroblastoma breakpoint family, member 20
known_NIR_213	chr1	145298838	145299548	-	145298838	145310658	A5SS	ENST00000622803.4	known	0.17	78	385	78	385	y	0.23	125	413	125	413	y	0.19	188	794	188	794	y	0.21	257	970	257	970	y	ENSG00000162825.16	NBPF20	chr1	protein_coding	neuroblastoma breakpoint family, member 20
known_NIR_214	chr1	145309948	145310658	-	145298838	145310658	A3SS	ENST00000622803.4	known	0.19	88	385	88	385	y	0.25	139	413	139	413	y	0.15	135	794	135	794	y	0.17	201	970	201	970	y	ENSG00000162825.16	NBPF20	chr1	protein_coding	neuroblastoma breakpoint family, member 20
known_NIR_215	chr1	145310830	145311437	-	145310830	145316207	A5SS	ENST00000622803.4	known	0.49	212	219	212	219	y	0.44	225	283	225	283	y	0.45	368	444	368	444	y	0.47	428	482	428	482	y	ENSG00000162825.16	NBPF20	chr1	protein_coding	neuroblastoma breakpoint family, member 20
known_NIR_216	chr1	145315598	145316207	-	145310830	145316207	A3SS	ENST00000622803.4	known	0.4	144	219	144	219	y	0.38	173	283	173	283	y	0.35	244	444	244	444	y	0.4	318	482	318	482	y	ENSG00000162825.16	NBPF20	chr1	protein_coding	neuroblastoma breakpoint family, member 20
known_NIR_217	chr1	145317150	145317781	-	145317150	145320969	A5SS	ENST00000622803.4	known	0.44	162	208	162	208	y	0.41	122	179	122	179	y	0.36	233	414	233	414	y	0.47	296	330	296	330	y	ENSG00000162825.16	NBPF20	chr1	protein_coding	neuroblastoma breakpoint family, member 20
known_NIR_218	chr1	145320368	145320969	-	145317150	145320969	A3SS	ENST00000622803.4	known	0.41	145	208	145	208	y	0.48	162	179	162	179	y	0.36	235	414	235	414	y	0.48	303	330	303	330	y	ENSG00000162825.16	NBPF20	chr1	protein_coding	neuroblastoma breakpoint family, member 20
known_NIR_219	chr1	145321020	145321740	-	145321020	145350291	A5SS	ENST00000622803.4	known	0.17	117	568	117	568	y	0.18	116	528	116	528	y	0.16	227	1176	227	1176	y	0.19	238	1023	238	1023	y	ENSG00000162825.16	NBPF20	chr1	protein_coding	neuroblastoma breakpoint family, member 20
known_NIR_220	chr1	145336185	145336814	-	145291769	145336814	A3SS	ENST00000594479.7	known	0.64	101	58	101	58	y	0.67	144	70	144	70	y	0.72	251	96	251	96	y	0.69	287	129	287	129	y	ENSG00000162825.16	NBPF20	chr1	protein_coding	neuroblastoma breakpoint family, member 20
known_NIR_221	chr1	145337809	145338454	-	145337809	145352742	A5SS	ENST00000594479.7	known	0.41	274	388	274	388	y	0.35	255	464	255	464	y	0.38	453	750	453	750	y	0.38	627	1008	627	1008	y	ENSG00000162825.16	NBPF20	chr1	protein_coding	neuroblastoma breakpoint family, member 20
known_NIR_222	chr1	145337809	145352742	-	145352089	145352742	A3SS&ES	ENST00000622803.4	known	0.54	388	334	388	334	y	0.55	464	375	464	375	y	0.59	750	527	750	527	y	0.55	1008	810	1008	810	y	ENSG00000162825.16	NBPF20	chr1	protein_coding	neuroblastoma breakpoint family, member 20
known_NIR_223	chr1	145349571	145350291	-	145321020	145350291	A3SS	ENST00000622803.4	known	0.17	116	568	116	568	y	0.14	89	528	89	528	y	0.13	178	1176	178	1176	y	0.15	183	1023	183	1023	y	ENSG00000162825.16	NBPF20	chr1	protein_coding	neuroblastoma breakpoint family, member 20
known_NIR_224	chr1	145352793	145353503	-	145352793	145358251	A5SS	ENST00000622803.4	known	0.52	254	234	254	234	y	0.56	358	278	358	278	y	0.54	513	433	513	433	y	0.55	693	558	693	558	y	ENSG00000162825.16	NBPF20	chr1	protein_coding	neuroblastoma breakpoint family, member 20
known_NIR_225	chr1	145355227	145355856	-	145355227	145378043	A5SS	ENST00000594479.7	known	0.43	120	160	120	160	y	0.39	86	136	86	136	y	0.38	181	298	181	298	y	0.51	221	215	221	215	y	ENSG00000162825.16	NBPF20	chr1	protein_coding	neuroblastoma breakpoint family, member 20
known_NIR_226	chr1	145357541	145358251	-	145352793	145358251	A3SS	ENST00000622803.4	known	0.26	82	234	82	234	y	0.33	140	278	140	278	y	0.21	116	433	116	433	y	0.26	199	558	199	558	y	ENSG00000162825.16	NBPF20	chr1	protein_coding	neuroblastoma breakpoint family, member 20
known_NIR_227	chr1	145358423	145359031	-	145358423	145368545	A5SS	ENST00000622803.4	known	0.22	209	728	209	728	y	0.25	255	780	255	780	y	0.24	379	1204	379	1204	y	0.24	423	1359	423	1359	y	ENSG00000162825.16	NBPF20	chr1	protein_coding	neuroblastoma breakpoint family, member 20
known_NIR_228	chr1	145367936	145368545	-	145358423	145368545	A3SS	ENST00000622803.4	known	0.21	197	728	197	728	y	0.22	214	780	214	780	y	0.22	348	1204	348	1204	y	0.22	392	1359	392	1359	y	ENSG00000162825.16	NBPF20	chr1	protein_coding	neuroblastoma breakpoint family, member 20
known_NIR_229	chr1	145368596	145369316	-	145368596	145388318	A5SS	ENST00000622803.4	known	0.18	206	913	206	913	y	0.16	175	947	175	947	y	0.19	381	1574	381	1574	y	0.2	426	1732	426	1732	y	ENSG00000162825.16	NBPF20	chr1	protein_coding	neuroblastoma breakpoint family, member 20
known_NIR_230	chr1	145377438	145378043	-	145355227	145378043	A3SS	ENST00000594479.7	known	0.52	174	160	174	160	y	0.62	218	136	218	136	y	0.52	322	298	322	298	y	0.63	371	215	371	215	y	ENSG00000162825.16	NBPF20	chr1	protein_coding	neuroblastoma breakpoint family, member 20
known_NIR_231	chr1	145378986	145379617	-	145378986	145384371	A5SS	ENST00000594479.7	known	0.44	248	312	248	312	y	0.47	275	314	275	314	y	0.46	427	503	427	503	y	0.48	581	632	581	632	y	ENSG00000162825.16	NBPF20	chr1	protein_coding	neuroblastoma breakpoint family, member 20
known_NIR_232	chr1	145383742	145384371	-	145378986	145384371	A3SS	ENST00000594479.7	known	0.29	130	312	130	312	y	0.33	154	314	154	314	y	0.36	277	503	277	503	y	0.33	311	632	311	632	y	ENSG00000162825.16	NBPF20	chr1	protein_coding	neuroblastoma breakpoint family, member 20
known_NIR_233	chr1	145384479	145385194	-	145292489	145385194	A3SS	ENST00000620821.1	known	0.19	210	910	210	910	y	0.19	213	888	213	888	y	0.16	362	1932	362	1932	y	0.13	431	2890	431	2890	y	ENSG00000162825.16	NBPF20	chr1	protein_coding	neuroblastoma breakpoint family, member 20
known_NIR_234	chr1	145387598	145388318	-	145368596	145388318	A3SS	ENST00000622803.4	known	0.14	146	913	146	913	y	0.12	127	947	127	947	y	0.13	238	1574	238	1574	y	0.13	254	1732	254	1732	y	ENSG00000162825.16	NBPF20	chr1	protein_coding	neuroblastoma breakpoint family, member 20
known_NIR_235	chr1	145388490	145393884	-	145388490	145389121	A5SS&ES	ENST00000392971.6	known	0.39	96	153	96	153	y	0.49	114	121	114	121	y	0.33	123	248	123	248	y	0.25	104	304	104	304	y	ENSG00000162825.16	NBPF20	chr1	protein_coding	neuroblastoma breakpoint family, member 20
known_NIR_236	chr1	145393246	145393884	-	145388490	145393884	A3SS	ENST00000622803.4	known	0.42	69	96	69	96	y	0.41	79	114	79	114	y	0.31	54	123	54	123	y	0.38	63	104	63	104	y	ENSG00000162825.16	NBPF20	chr1	protein_coding	neuroblastoma breakpoint family, member 20
known_NIR_237	chr1	145393935	145399049	-	145393935;145395141	145394978;145399049	ES	ENST00000369373.9	known	0	0	56.5	0	59;54	n	0	0	84.5	0	125;44	n	0	0	104	0	91;117	n	0.02	3	160.5	3	107;214	y	ENSG00000162825.16	NBPF20	chr1	protein_coding	neuroblastoma breakpoint family, member 20
known_NIR_238	chr1	145608175;145612247	145612202;145616234	+	145608175	145616234	cassetteExon	ENST00000313835.13	known	0	0	83	0;0	83	n	0	0	38	0;0	38	n	0	0	61	0;0	61	n	0.05	4	80	4;4	80	y	ENSG00000117262.18	GPR89A	chr1	protein_coding	G protein-coupled receptor 89A
known_NIR_239	chr1	145838206	145839890	+	145838206	145842339	A3SS	ENST00000369294.5	known	1	98	0	98	0	n	1	258	0	258	0	n	0.82	121	27	121	27	y	1	205	0	205	0	n	ENSG00000186141.8	POLR3C	chr1	protein_coding	polymerase (RNA) III (DNA directed) polypeptide C (62kD)
known_NIR_240	chr1	145841071	145842339	+	145838206	145842339	A5SS	ENST00000369294.5	known	1	121	0	121	0	n	1	63	0	63	0	n	0.74	78	27	78	27	y	1	100	0	100	0	n	ENSG00000186141.8	POLR3C	chr1	protein_coding	polymerase (RNA) III (DNA directed) polypeptide C (62kD)
known_NIR_241	chr1	145926883	145927018	-	145926886	145927018	A3SS	ENST00000583313.6	known	0.13	197	1372	197	1372	y	0.12	236	1777	236	1777	y	0.07	113	1613	113	1613	y	0.12	209	1608	209	1608	y	ENSG00000265241.6	RBM8A	chr1	protein_coding	RNA binding motif protein 8A
known_NIR_242	chr1	145975436	145977483	+	145977152	145977483	A5SS&ES	ENST00000625258.1	known	0.08	8	95	8	95	y	0.12	8	57	8	57	y	0.4	41	62	41	62	y	0.36	23	41	23	41	y	ENSG00000280778.1	CH17-270A2.2	chr1	protein_coding		--
known_NIR_243	chr1	145975436;145977152	145977084;145977483	+	145975436	145977483	cassetteExon	ENST00000369313.7	known	0.92	90.5	8	86;95	8	y	0.87	54.5	8	52;57	8	y	0.55	51	41	40;62	41	y	0.62	37	23	33;41	23	y	ENSG00000121851.12	POLR3GL	chr1	protein_coding	polymerase (RNA) III (DNA directed) polypeptide G (32kD)-like
known_NIR_244	chr1	146066561	146067180	-	146066561	146093957	A5SS	ENST00000610925.4	known	0.51	153	147	153	147	y	0.63	241	143	241	143	y	0.53	243	214	243	214	y	0.55	375	307	375	307	y	ENSG00000271425.6	NBPF10	chr1	protein_coding	neuroblastoma breakpoint family, member 10
known_NIR_245	chr1	146066561	146067180	-	146066561	146103401	A5SS	ENST00000622244.4	known	0.5	153	153	153	153	y	0.62	241	147	241	147	y	0.52	243	226	243	226	y	0.54	375	324	375	324	y	ENSG00000271425.6	NBPF10	chr1	protein_coding	neuroblastoma breakpoint family, member 10
known_NIR_246	chr1	146066561	146067180	-	146066561	146120725	A5SS	ENST00000613224.4	known	1	153	0	153	0	n	1	241	0	241	0	n	0.92	243	22	243	22	y	0.89	375	47	375	47	y	ENSG00000271425.6	NBPF10	chr1	protein_coding	neuroblastoma breakpoint family, member 10
known_NIR_247	chr1	146066561	146067180	-	146066561	146122283	A5SS	ENST00000613557.4	known	0.48	153	165	153	165	y	0.61	241	155	241	155	y	0.5	243	240	243	240	y	0.53	375	334	375	334	y	ENSG00000271425.6	NBPF10	chr1	protein_coding	neuroblastoma breakpoint family, member 10
known_NIR_248	chr1	146066561	146093957	-	146066561	146103401	A5SS	ENST00000622244.4	known	0.49	147	153	147	153	y	0.49	143	147	143	147	y	0.49	214	226	214	226	y	0.49	307	324	307	324	y	ENSG00000271425.6	NBPF10	chr1	protein_coding	neuroblastoma breakpoint family, member 10
known_NIR_249	chr1	146066561	146103401	-	146066561	146120725	A5SS	ENST00000613224.4	known	1	153	0	153	0	n	1	147	0	147	0	n	0.91	226	22	226	22	y	0.87	324	47	324	47	y	ENSG00000271425.6	NBPF10	chr1	protein_coding	neuroblastoma breakpoint family, member 10
known_NIR_250	chr1	146066561	146120725	-	146066561	146093957	A5SS&ES	ENST00000610925.4	known	0	0	147	0	147	n	0	0	143	0	143	n	0.09	22	214	22	214	y	0.13	47	307	47	307	y	ENSG00000271425.6	NBPF10	chr1	protein_coding	neuroblastoma breakpoint family, member 10
known_NIR_251	chr1	146066561	146122283	-	146066561	146093957	A5SS&ES	ENST00000610925.4	known	0.53	165	147	165	147	y	0.52	155	143	155	143	y	0.53	240	214	240	214	y	0.52	334	307	334	307	y	ENSG00000271425.6	NBPF10	chr1	protein_coding	neuroblastoma breakpoint family, member 10
known_NIR_252	chr1	146066561	146122283	-	146066561	146103401	A5SS&ES	ENST00000622244.4	known	0.52	165	153	165	153	y	0.51	155	147	155	147	y	0.52	240	226	240	226	y	0.51	334	324	334	324	y	ENSG00000271425.6	NBPF10	chr1	protein_coding	neuroblastoma breakpoint family, member 10
known_NIR_253	chr1	146066561;146122391	146122283;146123106	-	146066561;146120776	146120725;146123106	MXE	ENST00000613224.4	known	0.98	176	3	165;187	0;6	n	0.97	170	5	155;185	0;10	n	0.95	308	16.5	240;376	22;11	y	0.91	364.5	36.5	334;395	47;26	y	ENSG00000271425.6	NBPF10	chr1	protein_coding	neuroblastoma breakpoint family, member 10
known_NIR_254	chr1	146093354	146093957	-	146066561	146093957	A3SS	ENST00000610925.4	known	0.59	208	147	208	147	y	0.62	231	143	231	143	y	0.65	390	214	390	214	y	0.62	495	307	495	307	y	ENSG00000271425.6	NBPF10	chr1	protein_coding	neuroblastoma breakpoint family, member 10
known_NIR_255	chr1	146098076	146098679	-	146098076	146101855	A5SS	ENST00000610925.4	known	0.63	215	128	215	128	y	0.75	235	77	235	77	y	0.65	456	246	456	246	y	0.7	528	223	528	223	y	ENSG00000271425.6	NBPF10	chr1	protein_coding	neuroblastoma breakpoint family, member 10
known_NIR_256	chr1	146101258	146101855	-	146098076	146101855	A3SS	ENST00000610925.4	known	0.66	250	128	250	128	y	0.79	293	77	293	77	y	0.68	517	246	517	246	y	0.74	627	223	627	223	y	ENSG00000271425.6	NBPF10	chr1	protein_coding	neuroblastoma breakpoint family, member 10
known_NIR_257	chr1	146102798	146103401	-	146066561	146103401	A3SS	ENST00000622244.4	known	0.6	226	153	226	153	y	0.65	278	147	278	147	y	0.66	448	226	448	226	y	0.63	551	324	551	324	y	ENSG00000271425.6	NBPF10	chr1	protein_coding	neuroblastoma breakpoint family, member 10
known_NIR_258	chr1	146107516	146108119	-	146107516	146127028	A5SS	ENST00000610925.4	known	0.82	196	42	196	42	y	0.66	231	120	231	120	y	0.76	430	139	430	139	y	0.82	493	111	493	111	y	ENSG00000271425.6	NBPF10	chr1	protein_coding	neuroblastoma breakpoint family, member 10
known_NIR_259	chr1	146120128	146120725	-	146066561	146120725	A3SS	ENST00000613224.4	known	1	87	0	87	0	n	1	123	0	123	0	n	0.88	164	22	164	22	y	0.83	228	47	228	47	y	ENSG00000271425.6	NBPF10	chr1	protein_coding	neuroblastoma breakpoint family, member 10
known_NIR_260	chr1	146120776;146121670	146121498;146127028	-	146120776;146124860	146123106;146127028	MXE	ENST00000613224.4	known	0.66	27	14	24;30	6;22	y	0.8	48.5	12.5	11;86	10;15	y	0.67	45	22	16;74	11;33	y	0.71	53.5	21.5	37;70	26;17	y	ENSG00000271425.6	NBPF10	chr1	protein_coding	neuroblastoma breakpoint family, member 10
known_NIR_261	chr1	146121670	146122283	-	146066561	146122283	A3SS	ENST00000613557.4	known	0.42	118	165	118	165	y	0.47	140	155	140	155	y	0.53	275	240	275	240	y	0.5	334	334	334	334	y	ENSG00000271425.6	NBPF10	chr1	protein_coding	neuroblastoma breakpoint family, member 10
known_NIR_262	chr1	146121670	146122283	-	146121670	146127028	A5SS	ENST00000612520.1	known	0.8	118	30	118	30	y	0.62	140	86	140	86	y	0.79	275	74	275	74	y	0.83	334	70	334	70	y	ENSG00000213240.8	NOTCH2NL	chr1	protein_coding	notch 2 N-terminal like
known_NIR_263	chr1	146121670	146127028	-	146107516	146127028	A3SS	ENST00000610925.4	known	0.42	30	42	30	42	y	0.42	86	120	86	120	y	0.35	74	139	74	139	y	0.39	70	111	70	111	y	ENSG00000271425.6	NBPF10	chr1	protein_coding	neuroblastoma breakpoint family, member 10
known_NIR_264	chr1	146121670	146127028	-	146124860	146127028	A3SS&ES	ENST00000613557.4	known	0.58	30	22	30	22	y	0.85	86	15	86	15	y	0.69	74	33	74	33	y	0.8	70	17	70	17	y	ENSG00000271425.6	NBPF10	chr1	protein_coding	neuroblastoma breakpoint family, member 10
known_NIR_265	chr1	146121670	146127028	-	146126408	146127028	A3SS&ES	ENST00000616399.3	known	0.81	30	7	30	7	y	0.91	86	8	86	8	y	0.71	74	30	74	30	y	0.7	70	30	70	30	y	ENSG00000271425.6	NBPF10	chr1	protein_coding	neuroblastoma breakpoint family, member 10
known_NIR_266	chr1	146124860	146125465	-	146124860	146127028	A5SS	ENST00000613224.4	known	0.87	150	22	150	22	y	0.93	202	15	202	15	y	0.86	199	33	199	33	y	0.93	224	17	224	17	y	ENSG00000271425.6	NBPF10	chr1	protein_coding	neuroblastoma breakpoint family, member 10
known_NIR_267	chr1	146124860	146127028	-	146107516	146127028	A3SS	ENST00000610925.4	known	0.34	22	42	22	42	y	0.11	15	120	15	120	y	0.19	33	139	33	139	y	0.13	17	111	17	111	y	ENSG00000271425.6	NBPF10	chr1	protein_coding	neuroblastoma breakpoint family, member 10
known_NIR_268	chr1	146126408	146127028	-	146107516	146127028	A3SS	ENST00000610925.4	known	0.14	7	42	7	42	y	0.06	8	120	8	120	y	0.18	30	139	30	139	y	0.21	30	111	30	111	y	ENSG00000271425.6	NBPF10	chr1	protein_coding	neuroblastoma breakpoint family, member 10
known_NIR_269	chr1	146126408	146127028	-	146124860	146127028	A3SS	ENST00000613224.4	known	0.24	7	22	7	22	y	0.35	8	15	8	15	y	0.48	30	33	30	33	y	0.64	30	17	30	17	y	ENSG00000271425.6	NBPF10	chr1	protein_coding	neuroblastoma breakpoint family, member 10
known_NIR_270	chr1	146127079	146132186	-	146127079;146128282	146128119;146132186	ES	ENST00000583866.8	known	0	0	61	0	53;69	n	0	0	94.5	0	133;56	n	0.05	8	169	8	132;206	y	0	0	211	0	131;291	n	ENSG00000271425.6	NBPF10	chr1	protein_coding	neuroblastoma breakpoint family, member 10
known_NIR_271	chr1	146140020	146140484	-	146133728	146140484	A3SS	ENST00000613224.4	known	1	18	0	18	0	n	1	57	0	57	0	n	0.96	126	5	126	5	y	1	100	0	100	0	n	ENSG00000271425.6	NBPF10	chr1	protein_coding	neuroblastoma breakpoint family, member 10
known_NIR_272	chr1	146144804	146144902	-	146144804	146144907	A5SS	ENST00000613224.4	known	0.33	2	4	2	4	n	-	-	-	-	-	-	0.57	8	6	8	6	y	0.11	4	33	4	33	y	ENSG00000271425.6	NBPF10	chr1	protein_coding	neuroblastoma breakpoint family, member 10
known_NIR_273	chr1	146156229	146156480	-	146147747	146156480	A3SS	ENST00000579793.6	known	1	94	0	94	0	n	0.96	164	6	164	6	y	1	125	0	125	0	n	0.94	168	10	168	10	y	ENSG00000264343.5	NOTCH2NL	chr1	protein_coding	notch 2 N-terminal like
known_NIR_274	chr1	146949422	146951348	+	146943562	146951348	A5SS	ENST00000617931.4	known	1	11	0	11	0	n	0.86	30	5	30	5	y	1	29	0	29	0	n	0.88	38	5	38	5	y	ENSG00000268043.7	NBPF12	chr1	protein_coding	neuroblastoma breakpoint family, member 12
known_NIR_275	chr1	146960011	146960109	+	146960006	146960109	A5SS	ENST00000617931.4	known	0.19	6	25	6	25	y	0.25	6	18	6	18	y	0.79	26	7	26	7	y	0.21	11	41	11	41	y	ENSG00000268043.7	NBPF12	chr1	protein_coding	neuroblastoma breakpoint family, member 12
known_NIR_276	chr1	146969596	146976929	+	146975891	146976929	A5SS&ES	ENST00000617614.4	known	1	20	0	20	0	n	0.73	27	10	27	10	y	0.17	9	44	9	44	y	0.6	24	16	24	16	y	ENSG00000268043.7	NBPF12	chr1	protein_coding	neuroblastoma breakpoint family, member 12
known_NIR_277	chr1	146969596;146977001	146976929;146977466	+	146969596;146970719	146970647;146977466	MXE	ENST00000439206.6	known	1	14.5	0	20;9	0;0	n	0.83	29	6	27;31	12;0	n	0.49	19.5	20	9;30	29;11	y	0.76	42.5	13.5	24;61	27;0	n	ENSG00000268043.7	NBPF12	chr1	protein_coding	neuroblastoma breakpoint family, member 12
known_NIR_278	chr1	146970719	146971183	+	146970719	146977466	A3SS	ENST00000439206.6	known	-	-	-	-	-	-	1	2	0	2	0	n	0.61	17	11	17	11	y	1	6	0	6	0	n	ENSG00000268043.7	NBPF12	chr1	protein_coding	neuroblastoma breakpoint family, member 12
known_NIR_279	chr1	146970719	146977466	+	146977001	146977466	A5SS&ES	ENST00000617614.4	known	0	0	9	0	9	n	0	0	31	0	31	n	0.27	11	30	11	30	y	0	0	61	0	61	n	ENSG00000268043.7	NBPF12	chr1	protein_coding	neuroblastoma breakpoint family, member 12
known_NIR_280	chr1	146979010	146984134	+	146979010;146983091	146982928;146984134	ES	ENST00000617931.4	known	0	0	11.5	0	19;4	n	0	0	21.5	0	43;0	n	0	0	20.5	0	30;11	n	0.12	6	43.5	6	84;3	y	ENSG00000268043.7	NBPF12	chr1	protein_coding	neuroblastoma breakpoint family, member 12
known_NIR_281	chr1	146984185	146984813	+	146984185	146986352	A3SS	ENST00000439206.6	known	0.33	11	22	11	22	y	1	12	0	12	0	n	0.46	16	19	16	19	y	0.8	12	3	12	3	y	ENSG00000268043.7	NBPF12	chr1	protein_coding	neuroblastoma breakpoint family, member 12
known_NIR_282	chr1	146985756	146986352	+	146984185	146986352	A5SS	ENST00000439206.6	known	0.83	104	22	104	22	y	1	79	0	79	0	n	0.83	94	19	94	19	y	0.97	86	3	86	3	y	ENSG00000268043.7	NBPF12	chr1	protein_coding	neuroblastoma breakpoint family, member 12
known_NIR_283	chr1	146988126;146990517	146990466;146991113	+	146988126;146988949	146988841;146991113	MXE	ENST00000579935.8	known	0.68	46	22	0;92	18;26	n	0.58	25.5	18.5	0;51	15;22	n	0.6	45	30	0;90	37;23	n	0.69	43.5	19.5	3;84	29;10	y	ENSG00000268043.7	NBPF12	chr1	protein_coding	neuroblastoma breakpoint family, member 12
known_NIR_284	chr1	146988949	146989574	+	146988949	146991113	A3SS	ENST00000579935.8	known	0.42	19	26	19	26	y	0.58	30	22	30	22	y	0.72	59	23	59	23	y	0.74	28	10	28	10	y	ENSG00000268043.7	NBPF12	chr1	protein_coding	neuroblastoma breakpoint family, member 12
known_NIR_285	chr1	146988949	146989574	+	146988949	146994332	A3SS	ENST00000611443.4	known	0.9	19	2	19	2	y	0.81	30	7	30	7	y	0.87	59	9	59	9	y	0.67	28	14	28	14	y	ENSG00000268043.7	NBPF12	chr1	protein_coding	neuroblastoma breakpoint family, member 12
known_NIR_286	chr1	146988949	146991113	+	146988949	146994332	A3SS	ENST00000611443.4	known	0.93	26	2	26	2	y	0.76	22	7	22	7	y	0.72	23	9	23	9	y	0.42	10	14	10	14	y	ENSG00000268043.7	NBPF12	chr1	protein_coding	neuroblastoma breakpoint family, member 12
known_NIR_287	chr1	146989746	146990466	+	146988126	146990466	A5SS	ENST00000439206.6	known	1	61	0	61	0	n	1	25	0	25	0	n	1	79	0	79	0	n	0.95	60	3	60	3	y	ENSG00000268043.7	NBPF12	chr1	protein_coding	neuroblastoma breakpoint family, member 12
known_NIR_288	chr1	146993707	146994332	+	146988949	146994332	A5SS	ENST00000611443.4	known	0.5	2	2	2	2	n	0.5	7	7	7	7	y	0.5	9	9	9	9	y	0.5	14	14	14	14	y	ENSG00000268043.7	NBPF12	chr1	protein_coding	neuroblastoma breakpoint family, member 12
known_NIR_289	chr1	147242830	147252623	+	147242830	147265932	A3SS	ENST00000369259.4	known	0.93	76	6	76	6	y	1	103	0	103	0	n	1	98	0	98	0	n	1	68	0	68	0	n	ENSG00000131778.17	CHD1L	chr1	protein_coding	chromodomain helicase DNA binding protein 1-like
known_NIR_290	chr1	147264584	147265932	+	147242830	147265932	A5SS	ENST00000369259.4	known	0.95	125	6	125	6	y	1	84	0	84	0	n	1	98	0	98	0	n	1	112	0	112	0	n	ENSG00000131778.17	CHD1L	chr1	protein_coding	chromodomain helicase DNA binding protein 1-like
known_NIR_291	chr1	148124067;148125001	148124899;148126829	-	148124067	148126829	cassetteExon	ENST00000614785.4	known	0.38	23	37	38;8	37	y	0.21	7	27	10;4	27	y	0.35	19.5	37	26;13	37	y	0.22	16.5	59	22;11	59	y	ENSG00000263956.5	NBPF11	chr1	protein_coding	neuroblastoma breakpoint family, member 11
known_NIR_292	chr1	148127038	148127141	-	148127038	148135672	A5SS	ENST00000580077.5	known	1	19	0	19	0	n	0.86	18	3	18	3	y	0.33	1	2	1	2	n	1	59	0	59	0	n	ENSG00000263956.5	NBPF11	chr1	protein_coding	neuroblastoma breakpoint family, member 11
known_NIR_293	chr1	148533248	148533861	-	148533248	148535453	A5SS	ENST00000611826.4	known	1	122	0	122	0	n	1	150	0	150	0	n	0.92	216	18	216	18	y	0.89	272	35	272	35	y	ENSG00000270629.5	NBPF14	chr1	protein_coding	neuroblastoma breakpoint family, member 14
known_NIR_294	chr1	148533248	148533861	-	148533248	148551153	A5SS	ENST00000621066.4	known	0.49	122	127	122	127	y	0.59	150	104	150	104	y	0.54	216	185	216	185	y	0.53	272	246	272	246	y	ENSG00000270629.5	NBPF14	chr1	protein_coding	neuroblastoma breakpoint family, member 14
known_NIR_295	chr1	148533248;148535504	148535453;148551976	-	148533248;148551261	148551153;148551976	MXE	ENST00000621066.4	known	0.07	12.5	169	0;25	127;211	n	0.19	36.5	156	0;73	104;208	n	0.12	37	278	18;56	185;371	y	0.17	68.5	336	35;102	246;426	y	ENSG00000270629.5	NBPF14	chr1	protein_coding	neuroblastoma breakpoint family, member 14
known_NIR_296	chr1	148534856	148535453	-	148533248	148535453	A3SS	ENST00000611826.4	known	1	89	0	89	0	n	1	50	0	50	0	n	0.9	166	18	166	18	y	0.86	221	35	221	35	y	ENSG00000270629.5	NBPF14	chr1	protein_coding	neuroblastoma breakpoint family, member 14
known_NIR_297	chr1	148535504	148536224	-	148535504	148551976	A5SS	ENST00000611826.4	known	0.88	176	25	176	25	y	0.64	129	73	129	73	y	0.84	301	56	301	56	y	0.81	431	102	431	102	y	ENSG00000270629.5	NBPF14	chr1	protein_coding	neuroblastoma breakpoint family, member 14
known_NIR_298	chr1	148550544	148551153	-	148533248	148551153	A3SS	ENST00000621066.4	known	0.57	167	127	167	127	y	0.7	242	104	242	104	y	0.66	357	185	357	185	y	0.66	488	246	488	246	y	ENSG00000270629.5	NBPF14	chr1	protein_coding	neuroblastoma breakpoint family, member 14
known_NIR_299	chr1	148552830	148553540	-	148552830	148562997	A5SS	ENST00000621066.4	known	0.38	425	685	425	685	y	0.4	466	686	466	686	y	0.42	862	1197	862	1197	y	0.4	1010	1519	1010	1519	y	ENSG00000270629.5	NBPF14	chr1	protein_coding	neuroblastoma breakpoint family, member 14
known_NIR_300	chr1	148552830	148553540	-	148552830	148575639	A5SS	ENST00000581201.5	known	0.26	425	1189	425	1189	y	0.3	466	1067	466	1067	y	0.31	862	1963	862	1963	y	0.29	1010	2450	1010	2450	y	ENSG00000270629.5	NBPF14	chr1	protein_coding	neuroblastoma breakpoint family, member 14
known_NIR_301	chr1	148552830	148562997	-	148552830	148575639	A5SS	ENST00000581201.5	known	0.37	685	1189	685	1189	y	0.39	686	1067	686	1067	y	0.38	1197	1963	1197	1963	y	0.38	1519	2450	1519	2450	y	ENSG00000270629.5	NBPF14	chr1	protein_coding	neuroblastoma breakpoint family, member 14
known_NIR_302	chr1	148562287	148562997	-	148552830	148562997	A3SS	ENST00000621066.4	known	0.2	173	685	173	685	y	0.17	142	686	142	686	y	0.24	388	1197	388	1197	y	0.26	541	1519	541	1519	y	ENSG00000270629.5	NBPF14	chr1	protein_coding	neuroblastoma breakpoint family, member 14
known_NIR_303	chr1	148564711	148565320	-	148564711	148568482	A5SS	ENST00000621066.4	known	0.83	182	37	182	37	y	0.76	171	54	171	54	y	0.73	379	139	379	139	y	0.72	462	182	462	182	y	ENSG00000270629.5	NBPF14	chr1	protein_coding	neuroblastoma breakpoint family, member 14
known_NIR_304	chr1	148567885	148568482	-	148564711	148568482	A3SS	ENST00000621066.4	known	0.84	193	37	193	37	y	0.81	224	54	224	54	y	0.74	388	139	388	139	y	0.75	560	182	560	182	y	ENSG00000270629.5	NBPF14	chr1	protein_coding	neuroblastoma breakpoint family, member 14
known_NIR_305	chr1	148569427	148573230	-	148569427	148570042	A5SS&ES	ENST00000614999.4	known	0.56	332	265	332	265	y	0.54	342	295	342	295	y	0.54	667	575	667	575	y	0.53	825	733	825	733	y	ENSG00000270629.5	NBPF14	chr1	protein_coding	neuroblastoma breakpoint family, member 14
known_NIR_306	chr1	148574225	148574878	-	148571037	148574878	A3SS	ENST00000614999.4	known	0.5	121	123	121	123	y	0.5	176	173	176	173	y	0.5	340	340	340	340	y	0.51	407	393	407	393	y	ENSG00000270629.5	NBPF14	chr1	protein_coding	neuroblastoma breakpoint family, member 14
known_NIR_307	chr1	148574929	148575639	-	148552830	148575639	A3SS	ENST00000581201.5	known	0.16	223	1189	223	1189	y	0.21	282	1067	282	1067	y	0.23	574	1963	574	1963	y	0.26	848	2450	848	2450	y	ENSG00000270629.5	NBPF14	chr1	protein_coding	neuroblastoma breakpoint family, member 14
known_NIR_308	chr1	148575811	148576410	-	148575811	148577983	A5SS	ENST00000621070.4	known	0.86	199	32	199	32	y	0.88	235	31	235	31	y	0.94	405	27	405	27	y	0.95	574	32	574	32	y	ENSG00000270629.5	NBPF14	chr1	protein_coding	neuroblastoma breakpoint family, member 14
known_NIR_309	chr1	148577355	148577983	-	148575811	148577983	A3SS	ENST00000621070.4	known	0.56	40	32	40	32	y	0.68	65	31	65	31	y	0.71	67	27	67	27	y	0.67	65	32	65	32	y	ENSG00000270629.5	NBPF14	chr1	protein_coding	neuroblastoma breakpoint family, member 14
known_NIR_310	chr1	148578034	148583141	-	148578034;148579237	148579074;148583141	ES	ENST00000614999.4	known	0	0	55	0	39;71	n	0	0	99	0	105;93	n	0.05	8	147.5	8	84;211	y	0.01	3	211.5	3	81;342	y	ENSG00000270629.5	NBPF14	chr1	protein_coding	neuroblastoma breakpoint family, member 14
known_NIR_311	chr1	148584676	148591432	-	148584676	148585141	A5SS&ES	ENST00000621066.4	known	0	0	86	0	86	n	0	0	69	0	69	n	0.03	5	186	5	186	y	0	0	188	0	188	n	ENSG00000270629.5	NBPF14	chr1	protein_coding	neuroblastoma breakpoint family, member 14
known_NIR_312	chr1	148586469	148587301	-	148586469	148593598	A5SS	ENST00000621066.4	known	0.62	29	18	29	18	y	0.37	11	19	11	19	y	0.3	29	67	29	67	y	0.37	28	47	28	47	y	ENSG00000270629.5	NBPF14	chr1	protein_coding	neuroblastoma breakpoint family, member 14
known_NIR_313	chr1	148586469;148593700	148593598;148595543	-	148586469;148592766	148587301;148595543	MXE	ENST00000620240.1	known	0.4	9.5	14.5	18;1	29;0	n	0.72	14.5	5.5	19;10	11;0	n	0.68	37	17.5	67;7	29;6	y	0.66	28	14.5	47;9	28;1	n	ENSG00000270629.5	NBPF14	chr1	protein_coding	neuroblastoma breakpoint family, member 14
known_NIR_314	chr1	148587403	148595543	-	148587403	148589184	A5SS&ES	ENST00000614329.4	known	0.48	12	13	12	13	y	0	0	6	0	6	n	0	0	12	0	12	n	0.12	1	7	1	7	n	ENSG00000270629.5	NBPF14	chr1	protein_coding	neuroblastoma breakpoint family, member 14
known_NIR_315	chr1	148590968	148591432	-	148584676	148591432	A3SS	ENST00000611826.4	known	1	14	0	14	0	n	1	57	0	57	0	n	0.96	114	5	114	5	y	1	100	0	100	0	n	ENSG00000270629.5	NBPF14	chr1	protein_coding	neuroblastoma breakpoint family, member 14
known_NIR_316	chr1	148592766	148593598	-	148586469	148593598	A3SS	ENST00000621066.4	known	0	0	18	0	18	n	0.32	9	19	9	19	y	0.27	25	67	25	67	y	0.18	10	47	10	47	y	ENSG00000270629.5	NBPF14	chr1	protein_coding	neuroblastoma breakpoint family, member 14
known_NIR_317	chr1	148592766	148595543	-	148592766;148593700	148593598;148595543	ES	ENST00000614999.4	known	0	0	0.5	0	0;1	n	0	0	9.5	0	9;10	n	0.27	6	16	6	25;7	y	0.1	1	9.5	1	10;9	n	ENSG00000270629.5	NBPF14	chr1	protein_coding	neuroblastoma breakpoint family, member 14
known_NIR_318	chr1	148953905	148960654	+	148937864	148960654	A5SS	ENST00000524974.5	known	1	74	0	74	0	n	1	32	0	32	0	n	1	35	0	35	0	n	0.96	74	3	74	3	y	ENSG00000178104.19	PDE4DIP	chr1	protein_coding	phosphodiesterase 4D interacting protein
known_NIR_319	chr1	149056620	149057335	-	149056620	149060523	A5SS	ENST00000613595.4	known	0.54	162	138	162	138	y	0.47	178	203	178	203	y	0.5	321	327	321	327	y	0.46	365	421	365	421	y	ENSG00000269713.7	NBPF9	chr1	protein_coding	neuroblastoma breakpoint family, member 9
known_NIR_320	chr1	149058215	149062093	-	149058215	149058925	A5SS&ES	ENST00000621074.4	known	0.2	74	298	74	298	y	0.22	79	278	79	278	y	0.15	98	569	98	569	y	0.19	147	636	147	636	y	ENSG00000269713.7	NBPF9	chr1	protein_coding	neuroblastoma breakpoint family, member 9
known_NIR_321	chr1	149058215	149062093	-	149061383	149062093	A3SS&ES	ENST00000613595.4	known	0.62	74	45	74	45	y	0.61	79	51	79	51	y	0.6	98	65	98	65	y	0.56	147	117	147	117	y	ENSG00000269713.7	NBPF9	chr1	protein_coding	neuroblastoma breakpoint family, member 9
known_NIR_322	chr1	149058215;149059097	149058925;149064431	-	149058215;149063805	149062093;149064431	MXE	ENST00000610300.4	known	0.66	150.5	78	298;3	74;82	y	0.61	148.5	96	278;19	79;113	y	0.73	295	111	569;21	98;124	y	0.72	321	124	636;6	147;101	y	ENSG00000269713.7	NBPF9	chr1	protein_coding	neuroblastoma breakpoint family, member 9
known_NIR_323	chr1	149058215;149062265	149062093;149062862	-	149058215;149059097	149058925;149062862	MXE	ENST00000613969.4	known	0.23	69	226	74;64	298;154	y	0.32	106.5	224.5	79;134	278;171	y	0.21	110	406.5	98;122	569;244	y	0.27	177.5	471	147;208	636;306	y	ENSG00000269713.7	NBPF9	chr1	protein_coding	neuroblastoma breakpoint family, member 9
known_NIR_324	chr1	149059097	149059700	-	149059097	149062862	A5SS	ENST00000613969.4	known	0.09	15	154	15	154	y	0.07	13	171	13	171	y	0.15	43	244	43	244	y	0.14	49	306	49	306	y	ENSG00000269713.7	NBPF9	chr1	protein_coding	neuroblastoma breakpoint family, member 9
known_NIR_325	chr1	149059097	149059700	-	149059097	149064431	A5SS	ENST00000621074.4	known	0.83	15	3	15	3	y	0.41	13	19	13	19	y	0.67	43	21	43	21	y	0.89	49	6	49	6	y	ENSG00000269713.7	NBPF9	chr1	protein_coding	neuroblastoma breakpoint family, member 9
known_NIR_326	chr1	149059097	149062862	-	149059097	149064431	A5SS	ENST00000621074.4	known	0.98	154	3	154	3	y	0.9	171	19	171	19	y	0.92	244	21	244	21	y	0.98	306	6	306	6	y	ENSG00000269713.7	NBPF9	chr1	protein_coding	neuroblastoma breakpoint family, member 9
known_NIR_327	chr1	149059097	149062862	-	149062265	149062862	A3SS&ES	ENST00000613595.4	known	0.71	154	64	154	64	y	0.56	171	134	171	134	y	0.67	244	122	244	122	y	0.6	306	208	306	208	y	ENSG00000269713.7	NBPF9	chr1	protein_coding	neuroblastoma breakpoint family, member 9
known_NIR_328	chr1	149059097	149064431	-	149063805	149064431	A3SS&ES	ENST00000613595.4	known	0.04	3	82	3	82	y	0.14	19	113	19	113	y	0.14	21	124	21	124	y	0.06	6	101	6	101	y	ENSG00000269713.7	NBPF9	chr1	protein_coding	neuroblastoma breakpoint family, member 9
known_NIR_329	chr1	149059808	149060523	-	149056620	149060523	A3SS	ENST00000613595.4	known	0.22	38	138	38	138	y	0.18	44	203	44	203	y	0.21	87	327	87	327	y	0.19	98	421	98	421	y	ENSG00000269713.7	NBPF9	chr1	protein_coding	neuroblastoma breakpoint family, member 9
known_NIR_330	chr1	149064482	149065637	-	149064482	149065526	A5SS	ENST00000615421.4	known	0.03	2	59	2	59	y	0.11	12	94	12	94	y	0.23	27	88	27	88	y	0.26	35	102	35	102	y	ENSG00000269713.7	NBPF9	chr1	protein_coding	neuroblastoma breakpoint family, member 9
known_NIR_331	chr1	149064482	149069594	-	149064482;149065689	149065526;149069594	ES	ENST00000615421.4	known	0	0	52.5	0	59;46	n	0	0	107	0	94;120	n	0	0	123.5	0	88;159	n	0.02	3	128.5	3	102;155	y	ENSG00000269713.7	NBPF9	chr1	protein_coding	neuroblastoma breakpoint family, member 9
known_NIR_332	chr1	149064482	149069594	-	149064482;149065689	149065637;149069594	ES	ENST00000621645.4	known	0	0	24	0	2;46	n	0	0	66	0	12;120	n	0	0	93	0	27;159	n	0.03	3	95	3	35;155	y	ENSG00000269713.7	NBPF9	chr1	protein_coding	neuroblastoma breakpoint family, member 9
known_NIR_333	chr1	149069645	149070934	-	149069645	149072718	A5SS	ENST00000621645.4	known	0.72	29	11	29	11	y	1	57	0	57	0	n	0.85	145	26	145	26	y	0.76	102	32	102	32	y	ENSG00000269713.7	NBPF9	chr1	protein_coding	neuroblastoma breakpoint family, member 9
known_NIR_334	chr1	149071676	149072718	-	149069645	149072718	A3SS	ENST00000621645.4	known	0.71	27	11	27	11	y	1	1	0	1	0	n	0.63	45	26	45	26	y	0.54	37	32	37	32	y	ENSG00000269713.7	NBPF9	chr1	protein_coding	neuroblastoma breakpoint family, member 9
known_NIR_335	chr1	149090894	149098438	-	149090894;149092785	149092755;149098438	ES	ENST00000615421.4	known	1	114	0	114	0;0	n	0.85	119	21	119	24;18	y	0.85	179	32.5	179	39;26	y	0.94	137	8	137	9;7	y	ENSG00000269713.7	NBPF9	chr1	protein_coding	neuroblastoma breakpoint family, member 9
known_NIR_336	chr1	149098706	149101262	-	149098706	149103301	A5SS	ENST00000615421.4	known	0.67	12	6	12	6	y	0.75	51	17	51	17	y	0.88	53	7	53	7	y	0.73	52	19	52	19	y	ENSG00000269713.7	NBPF9	chr1	protein_coding	neuroblastoma breakpoint family, member 9
known_NIR_337	chr1	149102847	149103301	-	149098706	149103301	A3SS	ENST00000615421.4	known	0.81	26	6	26	6	y	0.59	24	17	24	17	y	0.63	12	7	12	7	y	0.6	28	19	28	19	y	ENSG00000269713.7	NBPF9	chr1	protein_coding	neuroblastoma breakpoint family, member 9
known_NIR_338	chr1	149487383	149488013	+	149487383	149492768	A3SS	ENST00000611931.4	known	0.65	45	24	45	24	y	0.16	7	36	7	36	y	0.36	10	18	10	18	y	0.21	11	42	11	42	y	ENSG00000271383.6	NBPF19	chr1	protein_coding	neuroblastoma breakpoint family, member 19
known_NIR_339	chr1	149488956	149489561	+	149488956	149518110	A3SS	ENST00000369227.7	known	0.48	71	76	71	76	y	0.5	57	56	57	56	y	0.49	163	167	163	167	y	0.28	85	218	85	218	y	ENSG00000271383.6	NBPF19	chr1	protein_coding	neuroblastoma breakpoint family, member 19
known_NIR_340	chr1	149488956	149489561	+	149488956	149522865	A3SS	ENST00000612881.4	known	0.36	71	128	71	128	y	0.27	57	154	57	154	y	0.34	163	312	163	312	y	0.17	85	407	85	407	y	ENSG00000271383.6	NBPF19	chr1	protein_coding	neuroblastoma breakpoint family, member 19
known_NIR_341	chr1	149488956	149518110	+	149488956	149522865	A3SS	ENST00000612881.4	known	0.37	76	128	76	128	y	0.27	56	154	56	154	y	0.35	167	312	167	312	y	0.35	218	407	218	407	y	ENSG00000271383.6	NBPF19	chr1	protein_coding	neuroblastoma breakpoint family, member 19
known_NIR_342	chr1	149488956	149518110	+	149493711	149518110	A5SS&ES	ENST00000611931.4	known	0.27	76	201	76	201	y	0.16	56	287	56	287	y	0.26	167	479	167	479	y	0.23	218	712	218	712	y	ENSG00000271383.6	NBPF19	chr1	protein_coding	neuroblastoma breakpoint family, member 19
known_NIR_343	chr1	149488956;149523037	149522865;149528496	+	149488956;149527786	149518110;149528496	MXE	ENST00000369227.7	known	0.65	212.5	113	128;297	76;150	y	0.73	227.5	83	154;301	56;110	y	0.68	424.5	202.5	312;537	167;238	y	0.69	538	238.5	407;669	218;259	y	ENSG00000271383.6	NBPF19	chr1	protein_coding	neuroblastoma breakpoint family, member 19
known_NIR_344	chr1	149492134	149492768	+	149487383	149492768	A5SS	ENST00000611931.4	known	0.92	266	24	266	24	y	0.88	265	36	265	36	y	0.96	421	18	421	18	y	0.93	528	42	528	42	y	ENSG00000271383.6	NBPF19	chr1	protein_coding	neuroblastoma breakpoint family, member 19
known_NIR_345	chr1	149493711	149494318	+	149493711	149518110	A3SS	ENST00000611931.4	known	0.42	143	201	143	201	y	0.35	156	287	156	287	y	0.38	294	479	294	479	y	0.34	359	712	359	712	y	ENSG00000271383.6	NBPF19	chr1	protein_coding	neuroblastoma breakpoint family, member 19
known_NIR_346	chr1	149504767	149505418	+	149504767	149510179	A3SS	ENST00000426482.3	known	0.29	9	22	9	22	y	0.44	24	30	24	30	y	0.45	58	70	58	70	y	0.39	36	56	36	56	y	ENSG00000271383.6	NBPF19	chr1	protein_coding	neuroblastoma breakpoint family, member 19
known_NIR_347	chr1	149509528	149510179	+	149504767	149510179	A5SS	ENST00000426482.3	known	0.44	17	22	17	22	y	0.41	21	30	21	30	y	0.36	39	70	39	70	y	0.38	35	56	35	56	y	ENSG00000271383.6	NBPF19	chr1	protein_coding	neuroblastoma breakpoint family, member 19
known_NIR_348	chr1	149513528	149514238	+	149513528	149518992	A3SS	ENST00000426482.3	known	0.14	30	177	30	177	y	0.33	84	170	84	170	y	0.34	129	250	129	250	y	0.31	137	302	137	302	y	ENSG00000271383.6	NBPF19	chr1	protein_coding	neuroblastoma breakpoint family, member 19
known_NIR_349	chr1	149513528	149518992	+	149518282	149518992	A5SS&ES	ENST00000611931.4	known	0.48	177	193	177	193	y	0.48	170	185	170	185	y	0.42	250	345	250	345	y	0.43	302	399	302	399	y	ENSG00000271383.6	NBPF19	chr1	protein_coding	neuroblastoma breakpoint family, member 19
known_NIR_350	chr1	149517507	149518110	+	149488956	149518110	A5SS	ENST00000369227.7	known	0.63	131	76	131	76	y	0.7	129	56	129	56	y	0.57	217	167	217	167	y	0.6	333	218	333	218	y	ENSG00000271383.6	NBPF19	chr1	protein_coding	neuroblastoma breakpoint family, member 19
known_NIR_351	chr1	149517507	149518110	+	149493711	149518110	A5SS	ENST00000611931.4	known	0.39	131	201	131	201	y	0.31	129	287	129	287	y	0.31	217	479	217	479	y	0.32	333	712	333	712	y	ENSG00000271383.6	NBPF19	chr1	protein_coding	neuroblastoma breakpoint family, member 19
known_NIR_352	chr1	149520683	149521319	+	149520683	149554495	A3SS	ENST00000611931.4	known	0.72	293	114	293	114	y	0.84	304	60	304	60	y	0.9	451	51	451	51	y	0.75	584	191	584	191	y	ENSG00000271383.6	NBPF19	chr1	protein_coding	neuroblastoma breakpoint family, member 19
known_NIR_353	chr1	149522262	149522865	+	149488956	149522865	A5SS	ENST00000612881.4	known	0.54	150	128	150	128	y	0.45	126	154	126	154	y	0.41	213	312	213	312	y	0.46	340	407	340	407	y	ENSG00000271383.6	NBPF19	chr1	protein_coding	neuroblastoma breakpoint family, member 19
known_NIR_354	chr1	149522262;149523037	149522865;149528496	+	149522262;149527786	149526070;149528496	MXE	ENST00000369227.7	known	0.65	223.5	121	150;297	92;150	y	0.69	213.5	95.5	126;301	81;110	y	0.65	375	200	213;537	162;238	y	0.67	504.5	244	340;669	229;259	y	ENSG00000271383.6	NBPF19	chr1	protein_coding	neuroblastoma breakpoint family, member 19
known_NIR_355	chr1	149523037	149523747	+	149523037	149528496	A3SS	ENST00000612881.4	known	0.41	210	297	210	297	y	0.43	223	301	223	301	y	0.43	401	537	401	537	y	0.42	492	669	492	669	y	ENSG00000271383.6	NBPF19	chr1	protein_coding	neuroblastoma breakpoint family, member 19
known_NIR_356	chr1	149525440	149526070	+	149522262	149526070	A5SS	ENST00000369227.7	known	0.75	278	92	278	92	y	0.74	236	81	236	81	y	0.71	393	162	393	162	y	0.69	506	229	506	229	y	ENSG00000271383.6	NBPF19	chr1	protein_coding	neuroblastoma breakpoint family, member 19
known_NIR_357	chr1	149527786	149528496	+	149523037	149528496	A5SS	ENST00000612881.4	known	0.34	150	297	150	297	y	0.27	110	301	110	301	y	0.31	238	537	238	537	y	0.28	259	669	259	669	y	ENSG00000271383.6	NBPF19	chr1	protein_coding	neuroblastoma breakpoint family, member 19
known_NIR_358	chr1	149530169	149530799	+	149530169	149554495	A3SS	ENST00000369227.7	known	0.73	305	114	305	114	y	0.83	296	60	296	60	y	0.9	457	51	457	51	y	0.76	584	189	584	189	y	ENSG00000271383.6	NBPF19	chr1	protein_coding	neuroblastoma breakpoint family, member 19
known_NIR_359	chr1	149530169	149554495	+	149520683	149554495	A5SS	ENST00000611931.4	known	0.5	114	114	114	114	y	0.5	60	60	60	60	y	0.5	51	51	51	51	y	0.5	189	191	189	191	y	ENSG00000271383.6	NBPF19	chr1	protein_coding	neuroblastoma breakpoint family, member 19
known_NIR_360	chr1	149531742	149532345	+	149531742	149535554	A3SS	ENST00000612881.4	known	0.63	141	84	141	84	y	0.61	121	77	121	77	y	0.55	199	160	199	160	y	0.58	312	225	312	225	y	ENSG00000271383.6	NBPF19	chr1	protein_coding	neuroblastoma breakpoint family, member 19
known_NIR_361	chr1	149534920	149535554	+	149531742	149535554	A5SS	ENST00000612881.4	known	0.76	270	84	270	84	y	0.77	256	77	256	77	y	0.72	404	160	404	160	y	0.69	502	225	502	225	y	ENSG00000271383.6	NBPF19	chr1	protein_coding	neuroblastoma breakpoint family, member 19
known_NIR_362	chr1	149537272	149537982	+	149537272	149552209	A3SS	ENST00000612881.4	known	0.23	181	615	181	615	y	0.22	188	668	188	668	y	0.22	343	1207	343	1207	y	0.23	433	1462	433	1462	y	ENSG00000271383.6	NBPF19	chr1	protein_coding	neuroblastoma breakpoint family, member 19
known_NIR_363	chr1	149551499	149552209	+	149537272	149552209	A5SS	ENST00000612881.4	known	0.21	166	615	166	615	y	0.19	155	668	155	668	y	0.18	263	1207	263	1207	y	0.19	342	1462	342	1462	y	ENSG00000271383.6	NBPF19	chr1	protein_coding	neuroblastoma breakpoint family, member 19
known_NIR_364	chr1	149553882	149554495	+	149520683	149554495	A5SS	ENST00000611931.4	known	0.5	114	114	114	114	y	0.5	60	60	60	60	y	0.5	50	51	50	51	y	0.49	181	191	181	191	y	ENSG00000271383.6	NBPF19	chr1	protein_coding	neuroblastoma breakpoint family, member 19
known_NIR_365	chr1	149553882	149554495	+	149530169	149554495	A5SS	ENST00000369227.7	known	0.5	114	114	114	114	y	0.5	60	60	60	60	y	0.5	50	51	50	51	y	0.49	181	189	181	189	y	ENSG00000271383.6	NBPF19	chr1	protein_coding	neuroblastoma breakpoint family, member 19
known_NIR_366	chr1	149899672	149900010	+	149899672	149899843	A3SS	ENST00000369153.2	known	1	51	0	51	0	n	0.89	65	8	65	8	y	0.93	54	4	54	4	y	1	65	0	65	0	n	ENSG00000178096.8	BOLA1	chr1	protein_coding	bolA family member 1
known_NIR_367	chr1	149899730	149899843	+	149899672	149899843	A5SS	ENST00000369153.2	known	1	18	0	18	0	n	0	0	8	0	8	n	0.75	12	4	12	4	y	-	-	-	-	-	-	ENSG00000178096.8	BOLA1	chr1	protein_coding	bolA family member 1
known_NIR_368	chr1	149935705	149936154	-	149935620	149936154	A3SS	ENST00000369140.7	known	-	-	-	-	-	-	1	15	0	15	0	n	-	-	-	-	-	-	0.73	8	3	8	3	y	ENSG00000014914.19	MTMR11	chr1	protein_coding	myotubularin related protein 11
known_NIR_369	chr1	150067606	150068630	+	150067950	150068630	A5SS	ENST00000535106.5	known	0.2	16	66	16	66	y	0	0	136	0	136	n	0	0	159	0	159	n	0	0	170	0	170	n	ENSG00000136631.12	VPS45	chr1	protein_coding	vacuolar protein sorting 45 homolog (S. cerevisiae)
known_NIR_370	chr1	150220758	150223186	-	150220761	150223186	A3SS	ENST00000583931.5	known	0	0	361	0	361	n	0	0	284	0	284	n	0.02	9	431	9	431	y	0.03	18	527	18	527	y	ENSG00000143401.14	ANP32E	chr1	protein_coding	acidic (leucine-rich) nuclear phosphoprotein 32 family, member E
known_NIR_371	chr1	150220761	150226608	-	150220761;150223240	150223186;150226608	ES	ENST00000583931.5	known	0.01	3	407.5	3	361;454	y	0.04	12	315.5	12	284;347	y	0.02	12	515.5	12	431;600	y	0.01	6	597.5	6	527;668	y	ENSG00000143401.14	ANP32E	chr1	protein_coding	acidic (leucine-rich) nuclear phosphoprotein 32 family, member E
known_NIR_372	chr1	150220761;150223240	150223186;150230571	-	150220761;150226795	150226608;150230571	MXE	ENST00000533654.5	known	0.97	180.5	5	361;0	3;7	n	0.91	142	14	284;0	12;16	n	0.92	218	19.5	431;5	12;27	y	0.97	263.5	9	527;0	6;12	n	ENSG00000143401.14	ANP32E	chr1	protein_coding	acidic (leucine-rich) nuclear phosphoprotein 32 family, member E
known_NIR_373	chr1	150223240	150230571	-	150223240	150226608	A5SS&ES	ENST00000629042.2	known	0	0	454	0	454	n	0	0	347	0	347	n	0.01	5	600	5	600	y	0	0	668	0	668	n	ENSG00000143401.14	ANP32E	chr1	protein_coding	acidic (leucine-rich) nuclear phosphoprotein 32 family, member E
known_NIR_374	chr1	150223240;150226795	150226608;150230571	-	150223240	150230571	cassetteExon	ENST00000369114.9	known	1	230.5	0	454;7	0	n	1	181.5	0	347;16	0	n	0.98	313.5	5	600;27	5	y	1	340	0	668;12	0	n	ENSG00000143401.14	ANP32E	chr1	protein_coding	acidic (leucine-rich) nuclear phosphoprotein 32 family, member E
known_NIR_375	chr1	150223240;150230693	150230571;150231777	-	150223240;150229237	150226608;150231777	MXE	ENST00000436748.6	known	0.36	127	227	0;254	454;0	n	0.47	155.5	173.5	0;311	347;0	n	0.42	222.5	301.5	5;440	600;3	y	0.43	249	334	0;498	668;0	n	ENSG00000143401.14	ANP32E	chr1	protein_coding	acidic (leucine-rich) nuclear phosphoprotein 32 family, member E
known_NIR_376	chr1	150226795	150230571	-	150226795	150229072	A5SS&ES	ENST00000629042.2	known	0.02	7	298	7	298	y	0.04	16	398	16	398	y	0.04	27	639	27	639	y	0.02	12	672	12	672	y	ENSG00000143401.14	ANP32E	chr1	protein_coding	acidic (leucine-rich) nuclear phosphoprotein 32 family, member E
known_NIR_377	chr1	150226795	150230571	-	150226795;150229237	150229072;150230571	ES	ENST00000583931.5	known	0.03	7	267.5	7	298;237	y	0.04	16	389.5	16	398;381	y	0.05	27	532	27	639;425	y	0.02	12	613.5	12	672;555	y	ENSG00000143401.14	ANP32E	chr1	protein_coding	acidic (leucine-rich) nuclear phosphoprotein 32 family, member E
known_NIR_378	chr1	150226795;150230693	150230571;150231777	-	150226795;150229237	150229072;150231777	MXE	ENST00000436748.6	known	0.47	130.5	149	7;254	298;0	n	0.45	163.5	199	16;311	398;0	n	0.42	233.5	321	27;440	639;3	y	0.43	255	336	12;498	672;0	n	ENSG00000143401.14	ANP32E	chr1	protein_coding	acidic (leucine-rich) nuclear phosphoprotein 32 family, member E
known_NIR_379	chr1	150229237	150230571	-	150223240	150230571	A3SS	ENST00000369114.9	known	1	237	0	237	0	n	1	381	0	381	0	n	0.99	425	5	425	5	y	1	555	0	555	0	n	ENSG00000143401.14	ANP32E	chr1	protein_coding	acidic (leucine-rich) nuclear phosphoprotein 32 family, member E
known_NIR_380	chr1	150229237	150231777	-	150229237;150230693	150230571;150231777	ES	ENST00000583931.5	known	0	0	245.5	0	237;254	n	0	0	346	0	381;311	n	0.01	3	432.5	3	425;440	y	0	0	526.5	0	555;498	n	ENSG00000143401.14	ANP32E	chr1	protein_coding	acidic (leucine-rich) nuclear phosphoprotein 32 family, member E
known_NIR_381	chr1	150229237	150231777	-	150230693	150231777	A3SS&ES	ENST00000369114.9	known	0	0	254	0	254	n	0	0	311	0	311	n	0.01	3	440	3	440	y	0	0	498	0	498	n	ENSG00000143401.14	ANP32E	chr1	protein_coding	acidic (leucine-rich) nuclear phosphoprotein 32 family, member E
known_NIR_382	chr1	150231926	150234579	-	150231926	150235733	A5SS	ENST00000583931.5	known	0	0	199	0	199	n	0	0	397	0	397	n	0.01	5	484	5	484	y	0	0	703	0	703	n	ENSG00000143401.14	ANP32E	chr1	protein_coding	acidic (leucine-rich) nuclear phosphoprotein 32 family, member E
known_NIR_383	chr1	150267478;150267789	150267716;150267957	-	150267478	150267957	cassetteExon	ENST00000414276.6	known	0.94	460.5	27	526;395	27	y	0.98	419	8	452;386	8	y	0.98	360	8	422;298	8	y	0.99	442.5	6	476;409	6	y	ENSG00000117362.12	APH1A	chr1	protein_coding	APH1A gamma secretase subunit
known_NIR_384	chr1	150268127	150268698	-	150267991	150268698	A3SS	ENST00000414276.6	known	0.84	267	52	267	52	y	0.89	259	32	259	32	y	0.88	133	19	133	19	y	0.9	286	33	286	33	y	ENSG00000117362.12	APH1A	chr1	protein_coding	APH1A gamma secretase subunit
known_NIR_385	chr1	150441023;150441958	150441881;150443231	+	150441023	150443231	cassetteExon	ENST00000401000.8	known	0.19	7	30	14;0	30	n	0.7	55.5	24	66;45	24	y	0.54	50.5	43	53;48	43	y	0.72	98.5	38	101;96	38	y	ENSG00000163125.15	RPRD2	chr1	protein_coding	regulation of nuclear pre-mRNA domain containing 2
known_NIR_386	chr1	150491511	150491598	+	150491511	150497530	A3SS	ENST00000369054.6	known	1	163	0	163	0	n	0.98	174	3	174	3	y	1	167	0	167	0	n	1	225	0	225	0	n	ENSG00000143374.14	TARS2	chr1	protein_coding	threonyl-tRNA synthetase 2, mitochondrial (putative)
known_NIR_387	chr1	150492489;150496908	150496482;150497530	+	150492489	150497530	cassetteExon	ENST00000438568.6	known	0.77	123.5	37	114;133	37	y	0.73	146.5	55	185;108	55	y	0.48	76.5	84	66;87	84	y	0.57	131	99	150;112	99	y	ENSG00000143374.14	TARS2	chr1	protein_coding	threonyl-tRNA synthetase 2, mitochondrial (putative)
known_NIR_388	chr1	150496908	150497530	+	150491511	150497530	A5SS	ENST00000369054.6	known	1	133	0	133	0	n	0.97	108	3	108	3	y	1	87	0	87	0	n	1	112	0	112	0	n	ENSG00000143374.14	TARS2	chr1	protein_coding	threonyl-tRNA synthetase 2, mitochondrial (putative)
known_NIR_389	chr1	150511198	150512352	+	150511198;150511831	150511457;150512352	ES	ENST00000369049.8	known	0.09	62	632.5	62	503;762	y	0.09	44	462	44	395;529	y	0.09	41	398	41	347;449	y	0.16	106	546.5	106	477;616	y	ENSG00000143369.14	ECM1	chr1	protein_coding	extracellular matrix protein 1
known_NIR_390	chr1	150577491	150578843	-	150577491;150578491	150578244;150578843	ES	ENST00000620947.4	known	0.02	17	949.5	17	1030;869	y	0.04	42	975.5	42	947;1004	y	0.03	32	1109.5	32	1135;1084	y	0.05	51	1000	51	1049;951	y	ENSG00000143384.12	MCL1	chr1	protein_coding	myeloid cell leukemia 1
known_NIR_391	chr1	150625808	150627312	-	150625808	150626479	A5SS&ES	ENST00000369016.8	known	0	0	239	0	239	n	0.02	6	308	6	308	y	0.02	5	202	5	202	y	0.02	4	239	4	239	y	ENSG00000143420.17	ENSA	chr1	protein_coding	endosulfine alpha
known_NIR_392	chr1	150625808	150627312	-	150625808	150627398	A5SS	ENST00000356527.9	known	0	0	38	0	38	n	0.46	6	7	6	7	y	1	5	0	5	0	n	0.29	4	10	4	10	y	ENSG00000143420.17	ENSA	chr1	protein_coding	endosulfine alpha
known_NIR_393	chr1	150625808	150627312	-	150625808	150627467	A5SS	ENST00000369014.9	known	0	0	1582	0	1582	n	0	6	1478	6	1478	y	0	5	1327	5	1327	y	0	4	1537	4	1537	y	ENSG00000143420.17	ENSA	chr1	protein_coding	endosulfine alpha
known_NIR_394	chr1	150625808	150627398	-	150625808	150626479	A5SS&ES	ENST00000369016.8	known	0.14	38	239	38	239	y	0.02	7	308	7	308	y	0	0	202	0	202	n	0.04	10	239	10	239	y	ENSG00000143420.17	ENSA	chr1	protein_coding	endosulfine alpha
known_NIR_395	chr1	150625808	150627398	-	150625808	150627467	A5SS	ENST00000369014.9	known	0.02	38	1582	38	1582	y	0	7	1478	7	1478	y	0	0	1327	0	1327	n	0.01	10	1537	10	1537	y	ENSG00000143420.17	ENSA	chr1	protein_coding	endosulfine alpha
known_NIR_396	chr1	150625808	150627467	-	150625808;150626526	150626479;150627467	ES	ENST00000369016.8	known	0.88	1582	218	1582	239;197	y	0.84	1478	287	1478	308;266	y	0.88	1327	187	1327	202;172	y	0.87	1537	229	1537	239;219	y	ENSG00000143420.17	ENSA	chr1	protein_coding	endosulfine alpha
known_NIR_397	chr1	150627592	150629061	-	150627592	150629414	A5SS	ENST00000369016.8	known	0.2	261	1019	261	1019	y	0.19	241	1025	241	1025	y	0.17	217	1091	217	1091	y	0.14	179	1082	179	1082	y	ENSG00000143420.17	ENSA	chr1	protein_coding	endosulfine alpha
known_NIR_398	chr1	150711571;150711853	150711833;150714085	-	150711571	150714085	cassetteExon	ENST00000322343.11	known	0.72	36	14	36;36	14	y	1	38	0	42;34	0	n	0.69	37.5	17	34;41	17	y	0.78	34.5	10	40;29	10	y	ENSG00000143452.15	HORMAD1	chr1	protein_coding	HORMA domain containing 1
known_NIR_399	chr1	150714121;150714678	150714615;150717138	-	150714121	150717138	cassetteExon	ENST00000368995.8	known	0.71	19.5	8	27;12	8	y	1	29	0	28;30	0	n	1	44.5	0	55;34	0	n	0.92	33	3	38;28	3	y	ENSG00000143452.15	HORMAD1	chr1	protein_coding	HORMA domain containing 1
known_NIR_400	chr1	150829965	150831818	-	150829980	150831818	A3SS	ENST00000358595.9	known	0.07	11	136	11	136	y	0.15	19	111	19	111	y	0	1	225	1	225	n	0.05	16	286	16	286	y	ENSG00000143437.20	ARNT	chr1	protein_coding	aryl hydrocarbon receptor nuclear translocator
known_NIR_401	chr1	150839654	150846263	-	150839654;150842468	150842424;150846263	ES	ENST00000358595.9	known	0.27	36	96	36	108;84	y	0.05	9	163.5	9	146;181	y	0.14	23	136.5	23	145;128	y	0.13	25	174	25	178;170	y	ENSG00000143437.20	ARNT	chr1	protein_coding	aryl hydrocarbon receptor nuclear translocator
known_NIR_402	chr1	150926463	150927704	+	150926517	150927704	A5SS	ENST00000271640.9	known	0.01	1	77	1	77	n	0.17	8	39	8	39	y	0.11	12	98	12	98	y	0.21	13	50	13	50	y	ENSG00000143379.12	SETDB1	chr1	protein_coding	SET domain, bifurcated 1
known_NIR_403	chr1	150942688	150943920	+	150942688;150943053	150942852;150943920	ES	ENST00000271640.9	known	0	0	71.5	0	103;40	n	0	0	76	0	68;84	n	0.14	17	102.5	17	145;60	y	0	0	97	0	83;111	n	ENSG00000143379.12	SETDB1	chr1	protein_coding	SET domain, bifurcated 1
known_NIR_404	chr1	150964083	150964250	+	150964083	150964247	A3SS	ENST00000271640.9	known	0.04	2	53	2	53	y	0	0	46	0	46	n	0.14	10	62	10	62	y	0	0	81	0	81	n	ENSG00000143379.12	SETDB1	chr1	protein_coding	SET domain, bifurcated 1
known_NIR_405	chr1	150968201	150968395	-	150968174	150968395	A3SS	ENST00000561294.5	known	0.98	944	16	944	16	y	0.97	766	23	766	23	y	0.98	1033	20	1033	20	y	0.98	1059	24	1059	24	y	ENSG00000143418.19	CERS2	chr1	protein_coding	ceramide synthase 2
known_NIR_406	chr1	150969091	150974619	-	150969131	150974619	A3SS	ENST00000271688.10	known	0.87	681	98	681	98	y	0.91	544	52	544	52	y	0.88	610	86	610	86	y	0.89	643	79	643	79	y	ENSG00000143418.19	CERS2	chr1	protein_coding	ceramide synthase 2
known_NIR_407	chr1	151002323	151006312	-	151002968	151006312	A3SS	ENST00000622754.4	known	0.12	2	14	2	14	y	0	0	14	0	14	n	-	-	-	-	-	-	0.2	2	8	2	8	y	ENSG00000143409.15	FAM63A	chr1	protein_coding	family with sequence similarity 63, member A
known_NIR_408	chr1	151017904	151018467	+	151017904	151027233	A3SS	ENST00000368935.1	known	1	42	0	42	0	n	0.71	27	11	27	11	y	1	21	0	21	0	n	1	49	0	49	0	n	ENSG00000143363.15	PRUNE	chr1	protein_coding	prune exopolyphosphatase
known_NIR_409	chr1	151017904	151024611	+	151017904;151018669	151018467;151024611	ES	ENST00000271620.7	known	0.28	14	36	14	42;30	y	0	0	24.5	0	27;22	n	0.28	12	31.5	12	21;42	y	0.11	8	64.5	8	49;80	y	ENSG00000143363.15	PRUNE	chr1	protein_coding	prune exopolyphosphatase
known_NIR_410	chr1	151024795	151025515	+	151008671	151025515	A5SS	ENST00000368937.5	known	1	90	0	90	0	n	1	43	0	43	0	n	1	66	0	66	0	n	0.85	100	17	100	17	y	ENSG00000143363.15	PRUNE	chr1	protein_coding	prune exopolyphosphatase
known_NIR_411	chr1	151027327	151033806	+	151027327;151028944	151028786;151033806	ES	ENST00000271620.7	known	0.18	10	44.5	10	35;54	y	0.3	14	33	14	34;32	y	0.47	45	51.5	45	33;70	y	0.34	28	54	28	57;51	y	ENSG00000143363.15	PRUNE	chr1	protein_coding	prune exopolyphosphatase
known_NIR_412	chr1	151055993;151056786	151056651;151059479	-	151055993	151059479	cassetteExon	ENST00000439374.6	known	0.05	16	296	7;25	296	y	0.12	46	335	14;78	335	y	0.05	14.5	265	2;27	265	y	0.13	41	280	33;49	280	y	ENSG00000197622.12	CDC42SE1	chr1	protein_coding	CDC42 small effector 1
known_NIR_413	chr1	151098002	151107037	+	151098002;151103675	151103562;151107037	ES	ENST00000368918.7	known	0.64	28	15.5	28	19;12	y	0	0	15	0	10;20	n	0.5	16	16	16	20;12	y	0.22	8	29	8	32;26	y	ENSG00000143458.11	GABPB2	chr1	protein_coding	GA binding protein transcription factor, beta subunit 2
known_NIR_414	chr1	151162100	151165747	-	151162100	151165079	A5SS	ENST00000368908.9	known	0	0	56	0	56	n	0	0	41	0	41	n	0	0	40	0	40	n	0.23	18	59	18	59	y	ENSG00000163155.11	LYSMD1	chr1	protein_coding	LysM, putative peptidoglycan-binding, domain containing 1
known_NIR_415	chr1	151166252	151166471	+	151166203	151166471	A5SS	ENST00000368905.8	known	0.05	34	616	34	616	y	0.05	29	597	29	597	y	0.12	85	626	85	626	y	0.09	68	688	68	688	y	ENSG00000163156.11	SCNM1	chr1	protein_coding	sodium channel modifier 1
known_NIR_416	chr1	151199081	151224248	+	151199081	151224245	A3SS	ENST00000409426.5	known	0.9	316	35	316	35	y	0.66	163	83	163	83	y	0.76	269	87	269	87	y	0.68	342	160	342	160	y	ENSG00000143398.19	PIP5K1A	chr1	protein_coding	phosphatidylinositol-4-phosphate 5-kinase, type I, alpha
known_NIR_417	chr1	151224279;151224406	151224371;151227320	+	151224279	151227320	cassetteExon	ENST00000409426.5	known	0.07	22.5	316	22;23	316	y	0.01	1.5	201	0;3	201	n	0.06	18	306	22;14	306	y	0.05	26	502	24;28	502	y	ENSG00000143398.19	PIP5K1A	chr1	protein_coding	phosphatidylinositol-4-phosphate 5-kinase, type I, alpha
known_NIR_418	chr1	151236763	151239130	+	151236763;151238265	151238182;151239130	ES	ENST00000409426.5	known	0	1	241.5	1	286;197	n	0.02	4	218.5	4	273;164	y	0.01	2	346.5	2	404;289	y	0.07	28	387	28	414;360	y	ENSG00000143398.19	PIP5K1A	chr1	protein_coding	phosphatidylinositol-4-phosphate 5-kinase, type I, alpha
known_NIR_419	chr1	151240039	151242438	+	151240039;151242269	151242123;151242438	ES	ENST00000409426.5	known	0.03	12	347.5	12	277;418	y	0.04	14	327.5	14	360;295	y	0.06	32	478.5	32	490;467	y	0.1	44	389	44	455;323	y	ENSG00000143398.19	PIP5K1A	chr1	protein_coding	phosphatidylinositol-4-phosphate 5-kinase, type I, alpha
known_NIR_420	chr1	151266121	151266308	+	151266112	151266308	A5SS	ENST00000368884.7	known	0.08	80	977	80	977	y	0.11	103	825	103	825	y	0.11	91	757	91	757	y	0.08	70	757	70	757	y	ENSG00000159352.15	PSMD4	chr1	protein_coding	proteasome (prosome, macropain) 26S subunit, non-ATPase, 4
known_NIR_421	chr1	1512690	1516012	+	1512473	1516012	A5SS	ENST00000378756.7	known	0.01	3	197	3	197	y	0	0	362	0	362	n	0.12	23	164	23	164	y	0.05	11	225	11	225	y	ENSG00000197785.13	ATAD3A	chr1	protein_coding	ATPase family, AAA domain containing 3A
known_NIR_422	chr1	151307801	151310211	-	151307801	151327271	A5SS	ENST00000529142.5	known	0.43	18	24	18	24	y	0.67	18	9	18	9	y	1	3	0	3	0	n	0.62	10	6	10	6	y	ENSG00000143393.16	PI4KB	chr1	protein_coding	phosphatidylinositol 4-kinase, catalytic, beta
known_NIR_423	chr1	151307801	151315573	-	151307801	151327271	A5SS	ENST00000529142.5	known	0.88	180	24	180	24	y	0.97	256	9	256	9	y	1	177	0	177	0	n	0.97	173	6	173	6	y	ENSG00000143393.16	PI4KB	chr1	protein_coding	phosphatidylinositol 4-kinase, catalytic, beta
known_NIR_424	chr1	151307801	151327271	-	151307801;151316509	151315573;151327271	ES	ENST00000368874.8	known	0.13	24	165.5	24	180;151	y	0.05	9	164.5	9	256;73	y	0	0	117	0	177;57	n	0.04	6	157.5	6	173;142	y	ENSG00000143393.16	PI4KB	chr1	protein_coding	phosphatidylinositol 4-kinase, catalytic, beta
known_NIR_425	chr1	151307801;151310255	151310211;151315573	-	151307801	151315573	cassetteExon	ENST00000368874.8	known	0.11	22.5	180	18;27	180	y	0.09	24.5	256	18;31	256	y	0.02	3	177	3;3	177	y	0.06	11	173	10;12	173	y	ENSG00000143393.16	PI4KB	chr1	protein_coding	phosphatidylinositol 4-kinase, catalytic, beta
known_NIR_426	chr1	151316509	151324745	-	151316509	151327271	A5SS	ENST00000368874.8	known	0.22	42	151	42	151	y	0.35	39	73	39	73	y	0.42	42	57	42	57	y	0.25	47	142	47	142	y	ENSG00000143393.16	PI4KB	chr1	protein_coding	phosphatidylinositol 4-kinase, catalytic, beta
known_NIR_427	chr1	151316509	151327271	-	151307801	151327271	A3SS	ENST00000529142.5	known	0.86	151	24	151	24	y	0.89	73	9	73	9	y	1	57	0	57	0	n	0.96	142	6	142	6	y	ENSG00000143393.16	PI4KB	chr1	protein_coding	phosphatidylinositol 4-kinase, catalytic, beta
known_NIR_428	chr1	151316509;151324917	151324745;151326172	-	151316509	151326172	cassetteExon	ENST00000368875.6	known	0.18	25.5	114	42;9	114	y	0.2	25.5	99	39;12	99	y	0.27	43.5	118	42;45	118	y	0.13	29.5	192	47;12	192	y	ENSG00000143393.16	PI4KB	chr1	protein_coding	phosphatidylinositol 4-kinase, catalytic, beta
known_NIR_429	chr1	151316509;151326373	151326172;151327271	-	151316509	151327271	cassetteExon	ENST00000368874.8	known	0.39	98.5	151	114;83	151	y	0.57	96.5	73	99;94	73	y	0.62	91.5	57	118;65	57	y	0.52	151.5	142	192;111	142	y	ENSG00000143393.16	PI4KB	chr1	protein_coding	phosphatidylinositol 4-kinase, catalytic, beta
known_NIR_430	chr1	151326373	151327271	-	151307801	151327271	A3SS	ENST00000529142.5	known	0.78	83	24	83	24	y	0.91	94	9	94	9	y	1	65	0	65	0	n	0.95	111	6	111	6	y	ENSG00000143393.16	PI4KB	chr1	protein_coding	phosphatidylinositol 4-kinase, catalytic, beta
known_NIR_431	chr1	151346333	151346489	-	151346333	151346482	A5SS	ENST00000290524.8	known	0.97	156	5	156	5	y	0.9	155	17	155	17	y	0.81	218	51	218	51	y	0.81	261	61	261	61	y	ENSG00000143390.17	RFX5	chr1	protein_coding	regulatory factor X, 5 (influences HLA class II expression)
known_NIR_432	chr1	151368319	151369442	-	151368319;151369189	151369004;151369442	ES	ENST00000368868.9	known	0	0	78	0	71;85	n	0	0	53	0	37;69	n	0.17	15	71.5	15	63;80	y	0.11	9	73	9	72;74	y	ENSG00000143416.20	SELENBP1	chr1	protein_coding	selenium binding protein 1
known_NIR_433	chr1	151369978	151372638	-	151369769	151372638	A3SS	ENST00000368868.9	known	0	0	73	0	73	n	0	0	80	0	80	n	0	0	97	0	97	n	0.03	4	124	4	124	y	ENSG00000143416.20	SELENBP1	chr1	protein_coding	selenium binding protein 1
known_NIR_434	chr1	151428014	151428123	-	151428041	151428123	A3SS	ENST00000392723.5	known	0	0	48	0	48	n	0	0	53	0	53	n	0.08	5	58	5	58	y	0.05	6	110	6	110	y	ENSG00000143442.21	POGZ	chr1	protein_coding	pogo transposable element with ZNF domain
known_NIR_435	chr1	151430841	151442081	-	151441086	151442081	A3SS&ES	ENST00000368863.6	known	0.27	27	72	27	72	y	0.1	4	35	4	35	y	0.18	13	58	13	58	y	0.2	21	82	21	82	y	ENSG00000143442.21	POGZ	chr1	protein_coding	pogo transposable element with ZNF domain
known_NIR_436	chr1	151430841;151441086	151440928;151442081	-	151430841	151442081	cassetteExon	ENST00000392723.5	known	0.71	67	27	62;72	27	y	0.86	25.5	4	16;35	4	y	0.82	59	13	60;58	13	y	0.81	89	21	96;82	21	y	ENSG00000143442.21	POGZ	chr1	protein_coding	pogo transposable element with ZNF domain
known_NIR_437	chr1	15152784;15210562	15210490;15214895	+	15152784	15214895	cassetteExon	ENST00000428417.5	known	0.45	7.5	9	7;8	9	y	0.48	5.5	6	0;11	6	n	0.11	1.5	12	0;3	12	n	1	2.5	0	0;5	0	n	ENSG00000171729.13	TMEM51	chr1	protein_coding	transmembrane protein 51
known_NIR_438	chr1	15153954	15214895	+	15152784	15214895	A5SS	ENST00000428417.5	known	0.25	3	9	3	9	y	0.33	3	6	3	6	n	0.43	9	12	9	12	y	1	1	0	1	0	n	ENSG00000171729.13	TMEM51	chr1	protein_coding	transmembrane protein 51
known_NIR_439	chr1	15153954	15214895	+	15210562	15214895	A5SS&ES	ENST00000376014.7	known	0.27	3	8	3	8	y	0.21	3	11	3	11	y	0.75	9	3	9	3	y	0.17	1	5	1	5	n	ENSG00000171729.13	TMEM51	chr1	protein_coding	transmembrane protein 51
known_NIR_440	chr1	15153954;15210562	15210490;15214895	+	15153954	15214895	cassetteExon	ENST00000400796.7	known	0.6	4.5	3	1;8	3	n	0.71	7.5	3	4;11	3	y	0.14	1.5	9	0;3	9	n	0.86	6	1	7;5	1	n	ENSG00000171729.13	TMEM51	chr1	protein_coding	transmembrane protein 51
known_NIR_441	chr1	151540426	151562585	+	151540426;151562165	151562091;151562585	ES	ENST00000368849.7	known	0.65	182	97	182	100;94	y	0.67	247	123.5	247	120;127	y	0.62	167	100.5	167	81;120	y	0.74	230	82	230	82;82	y	ENSG00000143367.15	TUFT1	chr1	protein_coding	tuftelin 1
known_NIR_442	chr1	151563990	151566163	+	151563990;151564614	151564525;151566163	ES	ENST00000368849.7	known	0.07	21	273	21	281;265	y	0.16	44	226.5	44	261;192	y	0.14	46	277.5	46	281;274	y	0.08	30	332	30	329;335	y	ENSG00000143367.15	TUFT1	chr1	protein_coding	tuftelin 1
known_NIR_443	chr1	151693483	151693593	+	151693483	151694370	A3SS	ENST00000458013.6	known	0	0	12	0	12	n	0.73	8	3	8	3	y	0.41	15	22	15	22	y	0.04	2	46	2	46	y	ENSG00000143376.12	SNX27	chr1	protein_coding	sorting nexin family member 27
known_NIR_444	chr1	151760899	151762105	-	151760899;151761552	151761451;151762105	ES	ENST00000368830.7	known	0.23	130	429.5	130	412;447	y	0.19	117	492.5	117	530;455	y	0.24	148	472	148	442;502	y	0.27	175	481.5	175	511;452	y	ENSG00000143436.10	MRPL9	chr1	protein_coding	mitochondrial ribosomal protein L9
known_NIR_445	chr1	151767299	151770172	+	151767299;151768233	151768058;151770172	ES	ENST00000321531.9	known	0.64	8	4.5	8	8;1	n	0.51	9	8.5	9	7;10	y	0	0	7	0	14;0	n	0.44	6	7.5	6	4;11	y	ENSG00000143450.14	OAZ3	chr1	protein_coding	ornithine decarboxylase antizyme 3
known_NIR_446	chr1	151774227	151774413	-	151771986	151774413	A3SS	ENST00000368827.10	known	-	-	-	-	-	-	1	3	0	3	0	n	-	-	-	-	-	-	0.54	7	6	7	6	y	ENSG00000182134.15	TDRKH	chr1	protein_coding	tudor and KH domain containing
known_NIR_447	chr1	151783049	151790399	-	151783049	151790380	A5SS	ENST00000368827.10	known	0	0	28	0	28	n	0	0	39	0	39	n	0.15	5	29	5	29	y	0.33	13	26	13	26	y	ENSG00000182134.15	TDRKH	chr1	protein_coding	tudor and KH domain containing
known_NIR_448	chr1	151783049	151790405	-	151783049	151790380	A5SS	ENST00000368827.10	known	0	0	28	0	28	n	0.15	7	39	7	39	y	0	0	29	0	29	n	0.28	10	26	10	26	y	ENSG00000182134.15	TDRKH	chr1	protein_coding	tudor and KH domain containing
known_NIR_449	chr1	151783049	151790405	-	151783049	151790399	A5SS	ENST00000368823.5	known	-	-	-	-	-	-	1	7	0	7	0	n	0	0	5	0	5	n	0.43	10	13	10	13	y	ENSG00000182134.15	TDRKH	chr1	protein_coding	tudor and KH domain containing
known_NIR_450	chr1	151986251	151992523	-	151986251	151993752	A5SS	ENST00000368811.7	known	0	0	3522	0	3522	n	0	10	4409	10	4409	y	0	0	3257	0	3257	n	0	0	3797	0	3797	n	ENSG00000197747.8	S100A10	chr1	protein_coding	S100 calcium binding protein A10
known_NIR_451	chr1	15215431	15219330	+	15215431	15219326	A3SS	ENST00000428417.5	known	0	0	27	0	27	n	0	0	8	0	8	n	0.19	5	21	5	21	y	0.2	4	16	4	16	y	ENSG00000171729.13	TMEM51	chr1	protein_coding	transmembrane protein 51
known_NIR_452	chr1	153535360	153535789	-	153535360	153535949	A5SS	ENST00000368719.8	known	0.05	170	3566	170	3566	y	0.04	169	3942	169	3942	y	0.02	70	2789	70	2789	y	0.03	111	3098	111	3098	y	ENSG00000197956.9	S100A6	chr1	protein_coding	S100 calcium binding protein A6
known_NIR_453	chr1	153535360	153535949	-	153535375	153535949	A3SS	ENST00000496817.5	known	0.94	3566	232	3566	232	y	0.94	3942	237	3942	237	y	0.96	2789	129	2789	129	y	0.95	3098	170	3098	170	y	ENSG00000197956.9	S100A6	chr1	protein_coding	S100 calcium binding protein A6
known_NIR_454	chr1	153544809	153545470	-	153544809	153544958	5pMXE	ENST00000368715.5	known	0.83	739	156	739	156	y	0.83	1085	221	1085	221	y	0.88	677	93	677	93	y	0.82	771	166	771	166	y	ENSG00000196154.11	S100A4	chr1	protein_coding	S100 calcium binding protein A4
known_NIR_455	chr1	153544809	153545753	-	153544809	153544958	5pMXE	ENST00000368715.5	known	0.96	3829	156	3829	156	y	0.95	4611	221	4611	221	y	0.98	3781	93	3781	93	y	0.96	4243	166	4243	166	y	ENSG00000196154.11	S100A4	chr1	protein_coding	S100 calcium binding protein A4
known_NIR_456	chr1	153544809	153545753	-	153544809;153545518	153545470;153545753	ES	ENST00000354332.8	known	0.87	3829	560	3829	739;381	y	0.85	4611	821	4611	1085;557	y	0.88	3781	515.5	3781	677;354	y	0.88	4243	572	4243	771;373	y	ENSG00000196154.11	S100A4	chr1	protein_coding	S100 calcium binding protein A4
known_NIR_457	chr1	153548490	153549028	-	153548490	153549181	A5SS	ENST00000368713.7	known	0.69	58	26	58	26	y	0.86	65	11	65	11	y	1	87	0	87	0	n	1	78	0	78	0	n	ENSG00000188015.9	S100A3	chr1	protein_coding	S100 calcium binding protein A3
known_NIR_458	chr1	153561591;153563536	153563415;153563734	-	153561591	153563734	cassetteExon	ENST00000368708.7	known	0.03	19	621	21;17	621	y	0.05	33	631	42;24	631	y	0.01	6.5	471	0;13	471	n	0.02	10.5	468	17;4	468	y	ENSG00000196754.10	S100A2	chr1	protein_coding	S100 calcium binding protein A2
known_NIR_459	chr1	153563853	153565506	-	153563887	153565506	A3SS	ENST00000368708.7	known	0.05	36	697	36	697	y	0.06	49	768	49	768	y	0.06	27	421	27	421	y	0.03	20	554	20	554	y	ENSG00000196754.10	S100A2	chr1	protein_coding	S100 calcium binding protein A2
known_NIR_460	chr1	153563887	153566702	-	153563887	153565506	5pMXE	ENST00000368708.7	known	0.03	25	697	25	697	y	0	0	768	0	768	n	0.03	14	421	14	421	y	0	0	554	0	554	n	ENSG00000196754.10	S100A2	chr1	protein_coding	S100 calcium binding protein A2
known_NIR_461	chr1	153608177	153608274	-	153608177	153609178	A5SS	ENST00000368704.5	known	0.14	27	166	27	166	y	0.26	60	169	60	169	y	0.3	64	149	64	149	y	0.31	58	127	58	127	y	ENSG00000188643.10	S100A16	chr1	protein_coding	S100 calcium binding protein A16
known_NIR_462	chr1	153608177	153608274	-	153608177	153612952	A5SS	ENST00000368706.8	known	0.01	27	1991	27	1991	y	0.02	60	2561	60	2561	y	0.03	64	1771	64	1771	y	0.03	58	2014	58	2014	y	ENSG00000188643.10	S100A16	chr1	protein_coding	S100 calcium binding protein A16
known_NIR_463	chr1	153608177	153608899	-	153608177	153608274	5pMXE	ENST00000368703.6	known	0.98	1205	27	1205	27	y	0.96	1433	60	1433	60	y	0.93	861	64	861	64	y	0.94	953	58	953	58	y	ENSG00000188643.10	S100A16	chr1	protein_coding	S100 calcium binding protein A16
known_NIR_464	chr1	153608177	153608899	-	153608177	153609178	A5SS	ENST00000368704.5	known	0.88	1205	166	1205	166	y	0.89	1433	169	1433	169	y	0.85	861	149	861	149	y	0.88	953	127	953	127	y	ENSG00000188643.10	S100A16	chr1	protein_coding	S100 calcium binding protein A16
known_NIR_465	chr1	153608177	153608899	-	153608177	153612952	A5SS	ENST00000368706.8	known	0.38	1205	1991	1205	1991	y	0.36	1433	2561	1433	2561	y	0.33	861	1771	861	1771	y	0.32	953	2014	953	2014	y	ENSG00000188643.10	S100A16	chr1	protein_coding	S100 calcium binding protein A16
known_NIR_466	chr1	153608177	153612952	-	153608177	153609178	5pMXE	ENST00000368704.5	known	0.92	1991	166	1991	166	y	0.94	2561	169	2561	169	y	0.92	1771	149	1771	149	y	0.94	2014	127	2014	127	y	ENSG00000188643.10	S100A16	chr1	protein_coding	S100 calcium binding protein A16
known_NIR_467	chr1	153626533	153626951	-	153626533	153627483	A5SS	ENST00000440685.6	known	0.03	11	318	11	318	y	0.03	11	374	11	374	y	0.11	29	240	29	240	y	0.06	18	287	18	287	y	ENSG00000189171.13	S100A13	chr1	protein_coding	S100 calcium binding protein A13
known_NIR_468	chr1	153626533	153627139	-	153626533	153626951	5pMXE	ENST00000392622.3	known	0.97	380	11	380	11	y	0.97	326	11	326	11	y	0.92	353	29	353	29	y	0.94	292	18	292	18	y	ENSG00000189171.13	S100A13	chr1	protein_coding	S100 calcium binding protein A13
known_NIR_469	chr1	153626533	153627139	-	153626533	153627483	A5SS	ENST00000440685.6	known	0.54	380	318	380	318	y	0.47	326	374	326	374	y	0.6	353	240	353	240	y	0.5	292	287	292	287	y	ENSG00000189171.13	S100A13	chr1	protein_coding	S100 calcium binding protein A13
known_NIR_470	chr1	153626533	153631011	-	153626533	153626951	5pMXE	ENST00000392622.3	known	0.27	4	11	4	11	y	0	0	11	0	11	n	0	0	29	0	29	n	0.33	9	18	9	18	y	ENSG00000189171.13	S100A13	chr1	protein_coding	S100 calcium binding protein A13
known_NIR_471	chr1	153626533	153631011	-	153626533	153627139	5pMXE	ENST00000392623.5	known	0.01	4	380	4	380	y	0	0	326	0	326	n	0	0	353	0	353	n	0.03	9	292	9	292	y	ENSG00000189171.13	S100A13	chr1	protein_coding	S100 calcium binding protein A13
known_NIR_472	chr1	153626533;153627598	153627139;153631011	-	153626533	153631011	cassetteExon	ENST00000368699.3	known	0.98	190	4	380;0	4	n	1	163	0	326;0	0	n	1	178.5	0	353;4	0	n	0.94	154.5	9	292;17	9	y	ENSG00000189171.13	S100A13	chr1	protein_coding	S100 calcium binding protein A13
known_NIR_473	chr1	153626533;153627598	153627483;153631011	-	153626533	153631011	cassetteExon	ENST00000368699.3	known	0.98	159	4	318;0	4	n	1	187	0	374;0	0	n	1	122	0	240;4	0	n	0.94	152	9	287;17	9	y	ENSG00000189171.13	S100A13	chr1	protein_coding	S100 calcium binding protein A13
known_NIR_474	chr1	153631078	153632034	-	153631111	153632034	A3SS	ENST00000368699.3	known	-	-	-	-	-	-	0.69	9	4	9	4	y	-	-	-	-	-	-	0.53	8	7	8	7	y	ENSG00000189171.13	S100A13	chr1	protein_coding	S100 calcium binding protein A13
known_NIR_475	chr1	153638448	153642246	+	153638448	153642243	A3SS	ENST00000368690.7	known	0.37	287	481	287	481	y	0.43	331	433	331	433	y	0.26	198	567	198	567	y	0.51	356	337	356	337	y	ENSG00000160679.12	CHTOP	chr1	protein_coding	chromatin target of PRMT1
known_NIR_476	chr1	153638448	153645064	+	153638448	153642243	3pMXE	ENST00000368686.1	known	0	0	481	0	481	n	0	0	433	0	433	n	0.03	18	567	18	567	y	0	0	337	0	337	n	ENSG00000160679.12	CHTOP	chr1	protein_coding	chromatin target of PRMT1
known_NIR_477	chr1	153638448;153642429	153642243;153645064	+	153638448	153645064	cassetteExon	ENST00000614256.4	known	1	262	0	481;43	0	n	1	231.5	0	433;30	0	n	0.95	309.5	18	567;52	18	y	1	189.5	0	337;42	0	n	ENSG00000160679.12	CHTOP	chr1	protein_coding	chromatin target of PRMT1
known_NIR_478	chr1	153638448;153642429	153642246;153645064	+	153638448	153645064	cassetteExon	ENST00000614256.4	known	1	165	0	287;43	0	n	1	180.5	0	331;30	0	n	0.87	125	18	198;52	18	y	1	199	0	356;42	0	n	ENSG00000160679.12	CHTOP	chr1	protein_coding	chromatin target of PRMT1
known_NIR_479	chr1	153642429	153645064	+	153642429;153643364	153643227;153645064	ES	ENST00000368690.7	known	0.07	43	554.5	43	857;252	y	0.05	30	590	30	914;266	y	0.09	52	509.5	52	817;202	y	0.09	42	447.5	42	707;188	y	ENSG00000160679.12	CHTOP	chr1	protein_coding	chromatin target of PRMT1
known_NIR_480	chr1	153643364	153645064	+	153638448	153645064	A5SS	ENST00000614256.4	known	1	252	0	252	0	n	1	266	0	266	0	n	0.92	202	18	202	18	y	1	188	0	188	0	n	ENSG00000160679.12	CHTOP	chr1	protein_coding	chromatin target of PRMT1
known_NIR_481	chr1	153668557	153669836	-	153668576	153669836	A3SS	ENST00000615950.4	known	1	1574	0	1574	0	n	1	1954	0	1954	0	n	1	1683	0	1683	0	n	0.96	1591	65	1591	65	y	ENSG00000143621.16	ILF2	chr1	protein_coding	interleukin enhancer binding factor 2
known_NIR_482	chr1	153960754	153962529	-	153960754;153962350	153962220;153962529	ES	ENST00000621013.4	known	0	0	1291.5	0	1070;1513	n	0	0	1192.5	0	1196;1189	n	0.02	21	1082	21	1083;1081	y	0.01	8	1309.5	8	1297;1322	y	ENSG00000143570.17	SLC39A1	chr1	protein_coding	solute carrier family 39 (zinc transporter), member 1
known_NIR_483	chr1	153962747	153963059	-	153962747	153963177	A5SS	ENST00000621013.4	known	0.4	96	147	96	147	y	0.39	83	132	83	132	y	0.33	104	210	104	210	y	0.29	82	198	82	198	y	ENSG00000143570.17	SLC39A1	chr1	protein_coding	solute carrier family 39 (zinc transporter), member 1
known_NIR_484	chr1	153962747	153963059	-	153962747	153963495	A5SS	ENST00000356205.8	known	0.2	96	381	96	381	y	0.21	83	315	83	315	y	0.22	104	369	104	369	y	0.19	82	339	82	339	y	ENSG00000143570.17	SLC39A1	chr1	protein_coding	solute carrier family 39 (zinc transporter), member 1
known_NIR_485	chr1	153962747	153963495	-	153962747	153963177	5pMXE	ENST00000621013.4	known	0.72	381	147	381	147	y	0.7	315	132	315	132	y	0.64	369	210	369	210	y	0.63	339	198	339	198	y	ENSG00000143570.17	SLC39A1	chr1	protein_coding	solute carrier family 39 (zinc transporter), member 1
known_NIR_486	chr1	153968184	153968522	+	153968164	153968522	A5SS	ENST00000368607.7	known	0.3	8	19	8	19	y	0.92	11	1	11	1	n	0.63	19	11	19	11	y	0.63	32	19	32	19	y	ENSG00000143578.15	CREB3L4	chr1	protein_coding	cAMP responsive element binding protein 3-like 4
known_NIR_487	chr1	153968310	153968522	+	153968184	153968522	A5SS	ENST00000271889.8	known	0	0	8	0	8	n	0.48	10	11	10	11	y	0.05	1	19	1	19	n	0	0	32	0	32	n	ENSG00000143578.15	CREB3L4	chr1	protein_coding	cAMP responsive element binding protein 3-like 4
known_NIR_488	chr1	153968639	153968930	+	153968699	153968930	A5SS	ENST00000368607.7	known	0	0	23	0	23	n	0	0	10	0	10	n	0.33	15	30	15	30	y	0.08	3	36	3	36	y	ENSG00000143578.15	CREB3L4	chr1	protein_coding	cAMP responsive element binding protein 3-like 4
known_NIR_489	chr1	153984781	153986113	-	153984781	153984984	5pMXE	ENST00000614713.4	known	1	423	0	423	0	n	1	627	2	627	2	y	1	545	0	545	0	n	1	698	0	698	0	n	ENSG00000143545.8	RAB13	chr1	protein_coding	RAB13, member RAS oncogene family
known_NIR_490	chr1	154157721;154169383	154169305;154170400	-	154157721	154170400	cassetteExon	ENST00000611659.4	known	0.03	90	3317	94;86	3317	y	0.02	55.5	3037	43;68	3037	y	0.02	96.5	4175	82;111	4175	y	0.02	91.5	3898	81;102	3898	y	ENSG00000143549.19	TPM3	chr1	protein_coding	tropomyosin 3
known_NIR_491	chr1	154159048	154170400	-	154157721	154170400	A3SS	ENST00000611659.4	known	0.01	39	3317	39	3317	y	0.01	46	3037	46	3037	y	0.02	96	4175	96	4175	y	0.01	39	3898	39	3898	y	ENSG00000143549.19	TPM3	chr1	protein_coding	tropomyosin 3
known_NIR_492	chr1	154159048	154170400	-	154169383	154170400	A3SS&ES	ENST00000328159.8	known	0.31	39	86	39	86	y	0.4	46	68	46	68	y	0.46	96	111	96	111	y	0.28	39	102	39	102	y	ENSG00000143549.19	TPM3	chr1	protein_coding	tropomyosin 3
known_NIR_493	chr1	154167940	154169305	-	154157721	154169305	A3SS	ENST00000328159.8	known	0.15	17	94	17	94	y	0.35	23	43	23	43	y	0	0	82	0	82	n	0.07	6	81	6	81	y	ENSG00000143549.19	TPM3	chr1	protein_coding	tropomyosin 3
known_NIR_494	chr1	154170711;154171488	154171413;154172908	-	154170711;154172104	154172029;154172908	MXE	ENST00000368533.7	known	0	0	3043.5	0;0	3326;2761	n	0.03	84	2999.5	168;0	3179;2820	n	0.03	126	3723	240;12	3935;3511	y	0.03	102	3567	201;3	3737;3397	y	ENSG00000143549.19	TPM3	chr1	protein_coding	tropomyosin 3
known_NIR_495	chr1	154171488	154172908	-	154172104	154172908	A3SS&ES	ENST00000611659.4	known	0	0	2761	0	2761	n	0	0	2820	0	2820	n	0	12	3511	12	3511	y	0	3	3397	3	3397	y	ENSG00000143549.19	TPM3	chr1	protein_coding	tropomyosin 3
known_NIR_496	chr1	154212624	154214457	-	154212624;154213946	154213893;154214457	ES	ENST00000368521.9	known	0.18	129	574.5	129	655;494	y	0.17	154	740.5	154	770;711	y	0.16	149	761	149	771;751	y	0.16	145	774	145	786;762	y	ENSG00000143612.18	C1orf43	chr1	protein_coding	chromosome 1 open reading frame 43
known_NIR_497	chr1	154214574	154220342	-	154214574;154219937	154219836;154220342	ES	ENST00000368521.9	known	0.2	173	671	173	718;624	y	0.21	204	774	204	823;725	y	0.18	165	769.5	165	795;744	y	0.18	169	785	169	810;760	y	ENSG00000143612.18	C1orf43	chr1	protein_coding	chromosome 1 open reading frame 43
known_NIR_498	chr1	154220975	154225084	+	154220244	154225084	A5SS	ENST00000343815.10	known	0.83	100	20	100	20	y	1	110	0	110	0	n	1	104	0	104	0	n	1	169	0	169	0	n	ENSG00000143569.18	UBAP2L	chr1	protein_coding	ubiquitin associated protein 2-like
known_NIR_499	chr1	154234738	154235196	+	154234759	154235196	A5SS	ENST00000343815.10	known	0	2	452	2	452	y	0.01	5	402	5	402	y	0.03	9	346	9	346	y	0.06	22	347	22	347	y	ENSG00000143569.18	UBAP2L	chr1	protein_coding	ubiquitin associated protein 2-like
known_NIR_500	chr1	154234792	154235196	+	154234738	154235196	A5SS	ENST00000613315.4	known	0.96	50	2	50	2	y	0.91	50	5	50	5	y	0.84	47	9	47	9	y	0.76	70	22	70	22	y	ENSG00000143569.18	UBAP2L	chr1	protein_coding	ubiquitin associated protein 2-like
known_NIR_501	chr1	154234792	154235196	+	154234759	154235196	A5SS	ENST00000343815.10	known	0.1	50	452	50	452	y	0.11	50	402	50	402	y	0.12	47	346	47	346	y	0.17	70	347	70	347	y	ENSG00000143569.18	UBAP2L	chr1	protein_coding	ubiquitin associated protein 2-like
known_NIR_502	chr1	154261697	154266501	+	154261697	154263103	3pMXE	ENST00000343815.10	known	0.25	115	337	115	337	y	0.19	64	280	64	280	y	0.24	118	379	118	379	y	0.2	113	465	113	465	y	ENSG00000143569.18	UBAP2L	chr1	protein_coding	ubiquitin associated protein 2-like
known_NIR_503	chr1	154268954	154270881	+	154268954	154270200	3pMXE	ENST00000428931.5	known	0.59	27	19	27	19	y	0	0	47	0	47	n	0.11	4	34	4	34	y	0.24	21	66	21	66	y	ENSG00000143569.18	UBAP2L	chr1	protein_coding	ubiquitin associated protein 2-like
known_NIR_504	chr1	154272776	154273480	+	154272776	154273336	A3SS	ENST00000328703.11	known	0.03	27	1049	27	1049	y	0.03	33	1083	33	1083	y	0.02	21	941	21	941	y	0.05	43	777	43	777	y	ENSG00000143575.14	HAX1	chr1	protein_coding	HCLS1 associated protein X-1
known_NIR_505	chr1	154272776	154273774	+	154272776	154273336	A3SS&ES	ENST00000483970.6	known	0.01	9	1049	9	1049	y	0.02	23	1083	23	1083	y	0.01	7	941	7	941	y	0.01	4	777	4	777	y	ENSG00000143575.14	HAX1	chr1	protein_coding	HCLS1 associated protein X-1
known_NIR_506	chr1	154272776	154273774	+	154272776;154273598	154273336;154273774	ES	ENST00000328703.11	known	0.01	9	920.5	9	1049;792	y	0.02	23	1023.5	23	1083;964	y	0.01	7	914	7	941;887	y	0.01	4	739	4	777;701	y	ENSG00000143575.14	HAX1	chr1	protein_coding	HCLS1 associated protein X-1
known_NIR_507	chr1	154272776	154273774	+	154272776;154273598	154273480;154273774	ES	ENST00000457918.6	known	0.02	9	409.5	9	27;792	y	0.04	23	498.5	23	33;964	y	0.02	7	454	7	21;887	y	0.01	4	372	4	43;701	y	ENSG00000143575.14	HAX1	chr1	protein_coding	HCLS1 associated protein X-1
known_NIR_508	chr1	154273598	154273750	+	154273598	154273774	A3SS	ENST00000328703.11	known	0	3	792	3	792	y	0	2	964	2	964	y	0.02	21	887	21	887	y	0.02	14	701	14	701	y	ENSG00000143575.14	HAX1	chr1	protein_coding	HCLS1 associated protein X-1
known_NIR_509	chr1	154436110	154448125	+	154436110	154437435	3pMXE	ENST00000622330.4	known	0.82	14	3	14	3	y	0.47	8	9	8	9	y	0.7	21	9	21	9	y	0.91	32	3	32	3	y	ENSG00000160712.12	IL6R	chr1	protein_coding	interleukin 6 receptor
known_NIR_510	chr1	154449980	154465134	+	154449980;154454581	154454488;154465134	ES	ENST00000368485.7	known	0	0	20.5	0	0;41	n	0.48	15	16.5	15	16;17	y	0	0	5	0	0;10	n	0.15	8	45	8	43;47	y	ENSG00000160712.12	IL6R	chr1	protein_coding	interleukin 6 receptor
known_NIR_511	chr1	154602626	154627855	-	154602626	154607992	5pMXE	ENST00000368474.8	known	0.5	90	90	90	90	y	0.59	74	51	74	51	y	0.42	57	79	57	79	y	0.48	74	80	74	80	y	ENSG00000160710.15	ADAR	chr1	protein_coding	adenosine deaminase, RNA-specific
known_NIR_512	chr1	15495452	15504611	-	15495452	15518110	A5SS	ENST00000348549.9	known	0.72	36	14	36	14	y	0.87	34	5	34	5	y	1	31	0	31	0	n	0.71	52	21	52	21	y	ENSG00000132906.17	CASP9	chr1	protein_coding	caspase 9, apoptosis-related cysteine peptidase
known_NIR_513	chr1	154966080	154966162	-	154966077	154966162	A3SS	ENST00000368445.9	known	0.65	530	281	530	281	y	0.63	473	280	473	280	y	0.64	457	256	457	256	y	0.6	514	342	514	342	y	ENSG00000160691.18	SHC1	chr1	protein_coding	SHC (Src homology 2 domain containing) transforming protein 1
known_NIR_514	chr1	154974804	154977987	+	154974912	154977987	A5SS	ENST00000368439.5	known	0.97	1945	69	1945	69	y	0.95	2212	113	2212	113	y	0.99	2031	25	2031	25	y	0.97	2041	69	2041	69	y	ENSG00000173207.12	CKS1B	chr1	protein_coding	CDC28 protein kinase regulatory subunit 1B
known_NIR_515	chr1	154984066	154987466	+	154984066	154988105	A3SS	ENST00000368433.5	known	0.05	10	188	10	188	y	0	0	216	0	216	n	0.1	25	228	25	228	y	0.03	5	171	5	171	y	ENSG00000160688.18	FLAD1	chr1	protein_coding	flavin adenine dinucleotide synthetase 1
known_NIR_516	chr1	154988849	154990159	+	154988849;154989707	154989560;154990159	ES	ENST00000368433.5	known	0.12	16	120	16	107;133	y	0.19	44	189	44	155;223	y	0.21	35	131	35	118;144	y	0.33	59	122.5	59	97;148	y	ENSG00000160688.18	FLAD1	chr1	protein_coding	flavin adenine dinucleotide synthetase 1
known_NIR_517	chr1	154990257	154992565	+	154990257	154990339	A3SS&ES	ENST00000368432.5	known	0	0	150	0	150	n	0.04	6	154	6	154	y	0	0	95	0	95	n	0.07	8	102	8	102	y	ENSG00000160688.18	FLAD1	chr1	protein_coding	flavin adenine dinucleotide synthetase 1
known_NIR_518	chr1	154990257;154992673	154992565;154992902	+	154990257;154992786	154990339;154992902	MXE	ENST00000315144.14	known	0	0.5	140.5	0;1	150;131	n	0.03	4.5	174.5	6;3	154;195	y	0.01	2	136.5	0;4	95;178	n	0.06	9.5	156	8;11	102;210	y	ENSG00000160688.18	FLAD1	chr1	protein_coding	flavin adenine dinucleotide synthetase 1
known_NIR_519	chr1	154992786	154992902	+	154992673	154992902	A5SS	ENST00000295530.6	known	0.99	131	1	131	1	n	0.98	195	3	195	3	y	0.98	178	4	178	4	y	0.95	210	11	210	11	y	ENSG00000160688.18	FLAD1	chr1	protein_coding	flavin adenine dinucleotide synthetase 1
known_NIR_520	chr1	155002943	155010258	+	155002943	155014655	A3SS	ENST00000535420.5	known	0.16	75	407	75	407	y	0.19	69	298	69	298	y	0.03	6	219	6	219	y	0.14	73	446	73	446	y	ENSG00000160685.13	ZBTB7B	chr1	protein_coding	zinc finger and BTB domain containing 7B
known_NIR_521	chr1	155011015	155014655	+	155002943	155014655	A5SS	ENST00000535420.5	known	0.08	35	407	35	407	y	0.15	54	298	54	298	y	0	0	219	0	219	n	0.07	36	446	36	446	y	ENSG00000160685.13	ZBTB7B	chr1	protein_coding	zinc finger and BTB domain containing 7B
known_NIR_522	chr1	155051465	155052641	+	155051465	155052671	A3SS	ENST00000356955.6	known	0	0	455	0	455	n	0.07	14	193	14	193	y	0	0	273	0	273	n	0	0	312	0	312	n	ENSG00000143537.13	ADAM15	chr1	protein_coding	ADAM metallopeptidase domain 15
known_NIR_523	chr1	155052777	155053910	+	155052777;155053493	155053417;155053910	ES	ENST00000356955.6	known	0.1	54	507.5	54	494;521	y	0.02	7	333.5	7	259;408	y	0.03	13	366	13	323;409	y	0.02	7	351.5	7	328;375	y	ENSG00000143537.13	ADAM15	chr1	protein_coding	ADAM metallopeptidase domain 15
known_NIR_524	chr1	155060343;155060832	155060763;155062245	+	155060343	155062245	cassetteExon	ENST00000360674.8	known	0.97	542	14	539;545	14	y	0.97	333.5	12	379;288	12	y	0.99	462	5	505;419	5	y	0.95	390	19	409;371	19	y	ENSG00000143537.13	ADAM15	chr1	protein_coding	ADAM metallopeptidase domain 15
known_NIR_525	chr1	155060832	155061418	+	155060832	155061415	A3SS	ENST00000356955.6	known	0.29	6	15	6	15	y	0.2	11	43	11	43	y	0.89	8	1	8	1	n	0.34	11	21	11	21	y	ENSG00000143537.13	ADAM15	chr1	protein_coding	ADAM metallopeptidase domain 15
known_NIR_526	chr1	155060832	155061904	+	155060832;155061489	155061415;155061904	ES	ENST00000356955.6	known	0.25	3	9	3	15;3	y	0.68	61	29	61	43;15	y	0.86	39	6.5	39	1;12	n	0.62	21	13	21	21;5	y	ENSG00000143537.13	ADAM15	chr1	protein_coding	ADAM metallopeptidase domain 15
known_NIR_527	chr1	155060832	155061904	+	155060832;155061489	155061418;155061904	ES	ENST00000449910.6	known	0.4	3	4.5	3	6;3	y	0.82	61	13	61	11;15	y	0.8	39	10	39	8;12	y	0.72	21	8	21	11;5	y	ENSG00000143537.13	ADAM15	chr1	protein_coding	ADAM metallopeptidase domain 15
known_NIR_528	chr1	155060832	155062245	+	155060832;155061489	155061415;155062245	ES	ENST00000355956.6	known	0.98	545	12	545	15;9	y	0.9	288	31	288	43;19	y	0.99	419	3.5	419	1;6	n	0.95	371	17.5	371	21;14	y	ENSG00000143537.13	ADAM15	chr1	protein_coding	ADAM metallopeptidase domain 15
known_NIR_529	chr1	155060832	155062245	+	155060832;155061975	155061904;155062245	ES	ENST00000359280.8	known	0.97	545	15	545	3;27	y	0.86	288	48	288	61;35	y	0.92	419	37	419	39;35	y	0.94	371	22.5	371	21;24	y	ENSG00000143537.13	ADAM15	chr1	protein_coding	ADAM metallopeptidase domain 15
known_NIR_530	chr1	155060832;155061489	155061415;155062245	+	155060832;155061975	155061904;155062245	MXE	ENST00000359280.8	known	0.44	12	15	15;9	3;27	y	0.39	31	48	43;19	61;35	y	0.09	3.5	37	1;6	39;35	n	0.44	17.5	22.5	21;14	21;24	y	ENSG00000143537.13	ADAM15	chr1	protein_coding	ADAM metallopeptidase domain 15
known_NIR_531	chr1	155060832;155061489	155061418;155062245	+	155060832	155062245	cassetteExon	ENST00000271836.10	known	0.01	7.5	545	6;9	545	y	0.05	15	288	11;19	288	y	0.02	7	419	8;6	419	y	0.03	12.5	371	11;14	371	y	ENSG00000143537.13	ADAM15	chr1	protein_coding	ADAM metallopeptidase domain 15
known_NIR_532	chr1	155060832;155061489	155061418;155062245	+	155060832;155061975	155061904;155062245	MXE	ENST00000359280.8	known	0.33	7.5	15	6;9	3;27	y	0.24	15	48	11;19	61;35	y	0.16	7	37	8;6	39;35	y	0.36	12.5	22.5	11;14	21;24	y	ENSG00000143537.13	ADAM15	chr1	protein_coding	ADAM metallopeptidase domain 15
known_NIR_533	chr1	155061489	155062245	+	155061489;155061975	155061904;155062245	ES	ENST00000356955.6	known	0.38	9	15	9	3;27	y	0.43	19	25	19	15;35	y	0.2	6	23.5	6	12;35	y	0.49	14	14.5	14	5;24	y	ENSG00000143537.13	ADAM15	chr1	protein_coding	ADAM metallopeptidase domain 15
known_NIR_534	chr1	155061975	155062245	+	155060343	155062245	A5SS	ENST00000360674.8	known	0.66	27	14	27	14	y	0.74	35	12	35	12	y	0.88	35	5	35	5	y	0.56	24	19	24	19	y	ENSG00000143537.13	ADAM15	chr1	protein_coding	ADAM metallopeptidase domain 15
known_NIR_535	chr1	155067440	155069019	+	155067440	155068853	A3SS	ENST00000368409.7	known	0.32	21	44	21	44	y	0.23	15	51	15	51	y	0.09	9	89	9	89	y	0.27	22	61	22	61	y	ENSG00000243364.7	EFNA4	chr1	protein_coding	ephrin-A4
known_NIR_536	chr1	15507907	15518110	-	15495452	15518110	A3SS	ENST00000348549.9	known	0.8	57	14	57	14	y	0.91	48	5	48	5	y	1	53	0	53	0	n	0.78	76	21	76	21	y	ENSG00000132906.17	CASP9	chr1	protein_coding	caspase 9, apoptosis-related cysteine peptidase
known_NIR_537	chr1	155131634	155133730	+	155131634;155133568	155133503;155133730	ES	ENST00000368407.7	known	0.03	15	532.5	15	577;488	y	0	0	408.5	0	394;423	n	0.05	30	542	30	577;507	y	0.01	10	691.5	10	710;673	y	ENSG00000169242.11	EFNA1	chr1	protein_coding	ephrin-A1
known_NIR_538	chr1	155135991	155136299	+	155135680	155136299	A5SS	ENST00000484157.5	known	0.97	420	12	420	12	y	0.98	295	6	295	6	y	1	318	0	318	0	n	0.99	285	2	285	2	y	ENSG00000169241.17	SLC50A1	chr1	protein_coding	solute carrier family 50 (sugar efflux transporter), member 1
known_NIR_539	chr1	155136376	155137561	+	155136951	155137561	A5SS&ES	ENST00000622581.4	known	0.67	144	70	144	70	y	0.43	96	126	96	126	y	0.36	65	117	65	117	y	0.36	69	125	69	125	y	ENSG00000169241.17	SLC50A1	chr1	protein_coding	solute carrier family 50 (sugar efflux transporter), member 1
known_NIR_540	chr1	155136376;155136951	155136828;155137561	+	155136376	155137561	cassetteExon	ENST00000484157.5	known	0.41	98.5	144	127;70	144	y	0.57	127	96	128;126	96	y	0.66	127.5	65	138;117	65	y	0.65	130.5	69	136;125	69	y	ENSG00000169241.17	SLC50A1	chr1	protein_coding	solute carrier family 50 (sugar efflux transporter), member 1
known_NIR_541	chr1	155136376;155136951	155136828;155137979	+	155136376;155137722	155137561;155137979	MXE	ENST00000484157.5	known	0.29	71	176	127;15	144;208	y	0.35	80.5	152	128;33	96;208	y	0.38	71	116	138;4	65;167	y	0.37	97	163	136;58	69;257	y	ENSG00000169241.17	SLC50A1	chr1	protein_coding	solute carrier family 50 (sugar efflux transporter), member 1
known_NIR_542	chr1	155136951	155137979	+	155136951;155137722	155137561;155137979	ES	ENST00000622581.4	known	0.1	15	139	15	70;208	y	0.17	33	167	33	126;208	y	0.03	4	142	4	117;167	y	0.23	58	191	58	125;257	y	ENSG00000169241.17	SLC50A1	chr1	protein_coding	solute carrier family 50 (sugar efflux transporter), member 1
known_NIR_543	chr1	155140271	155140491	-	155140245	155140491	A3SS	ENST00000368400.4	known	0	0	35	0	35	n	0	0	53	0	53	n	0.56	5	4	5	4	n	0.03	2	68	2	68	y	ENSG00000179085.7	DPM3	chr1	protein_coding	dolichyl-phosphate mannosyltransferase polypeptide 3
known_NIR_544	chr1	155172892	155173317	-	155172892	155173221	A5SS	ENST00000295682.4	known	0.03	10	355	10	355	y	0.06	14	213	14	213	y	0.04	9	204	9	204	y	0.03	9	266	9	266	y	ENSG00000163463.11	KRTCAP2	chr1	protein_coding	keratinocyte associated protein 2
known_NIR_545	chr1	155186209;155186804	155186730;155187225	-	155186209	155187225	cassetteExon	ENST00000620103.4	known	0.03	15.5	523	17;14	523	y	0.01	4.5	333	0;9	333	n	0.03	11	369	18;4	369	y	0.05	13.5	284	22;5	284	y	ENSG00000185499.16	MUC1	chr1	protein_coding	mucin 1, cell surface associated
known_NIR_546	chr1	155187374	155187722	-	155187374	155187455	A5SS&ES	ENST00000611577.4	known	0	0	670	0	670	n	0.01	4	366	4	366	y	0	0	412	0	412	n	0	0	519	0	519	n	ENSG00000185499.16	MUC1	chr1	protein_coding	mucin 1, cell surface associated
known_NIR_547	chr1	155187374	155187722	-	155187374;155187576	155187455;155187722	ES	ENST00000620103.4	known	0	0	528	0	670;386	n	0.01	4	328	4	366;290	y	0	0	369.5	0	412;327	n	0	0	388.5	0	519;258	n	ENSG00000185499.16	MUC1	chr1	protein_coding	mucin 1, cell surface associated
known_NIR_548	chr1	155187374	155188163	-	155187374	155187455	A5SS&ES	ENST00000611577.4	known	0.02	16	670	16	670	y	0	0	366	0	366	n	0.03	13	412	13	412	y	0.02	8	519	8	519	y	ENSG00000185499.16	MUC1	chr1	protein_coding	mucin 1, cell surface associated
known_NIR_549	chr1	155187374	155188163	-	155187374;155187544	155187455;155188163	ES	ENST00000615517.4	known	0.05	16	339	16	670;8	y	0	0	183	0	366;0	n	0.06	13	206	13	412;0	n	0.03	8	261.5	8	519;4	y	ENSG00000185499.16	MUC1	chr1	protein_coding	mucin 1, cell surface associated
known_NIR_550	chr1	155187374;155187544	155187455;155192183	-	155187374;155188231	155188163;155192183	MXE	ENST00000368396.8	known	0.98	335	8	670;0	16;0	n	0.99	183	2.5	366;0	0;5	n	0.96	206	8.5	412;0	13;4	n	0.98	260.5	5.5	519;2	8;3	y	ENSG00000185499.16	MUC1	chr1	protein_coding	mucin 1, cell surface associated
known_NIR_551	chr1	155187374;155187544	155187455;155192183	-	155187374;155188285	155188163;155192183	MXE	ENST00000368389.6	known	0.98	335	8	670;0	16;0	n	0.97	183	5	366;0	0;10	n	0.92	206	17.5	412;0	13;22	n	0.97	260.5	8.5	519;2	8;9	y	ENSG00000185499.16	MUC1	chr1	protein_coding	mucin 1, cell surface associated
known_NIR_552	chr1	155187374;155187858	155187722;155188008	-	155187374;155187576	155187455;155188008	MXE	ENST00000614519.4	known	0.36	202	355	0;404	670;40	n	0.41	138	197.5	4;272	366;29	y	0.4	140	212	0;280	412;12	n	0.38	168	277.5	0;336	519;36	n	ENSG00000185499.16	MUC1	chr1	protein_coding	mucin 1, cell surface associated
known_NIR_553	chr1	155187374;155188212	155188163;155192183	-	155187374;155187544	155187455;155192183	MXE	ENST00000342482.8	known	0.02	8	335	16;0	670;0	n	0	0	183	0;0	366;0	n	0.03	6.5	206	13;0	412;0	n	0.03	7.5	260.5	8;7	519;2	y	ENSG00000185499.16	MUC1	chr1	protein_coding	mucin 1, cell surface associated
known_NIR_554	chr1	155187544	155188008	-	155187576	155188008	A3SS	ENST00000614519.4	known	0.17	8	40	8	40	y	0	0	29	0	29	n	0	0	12	0	12	n	0.38	22	36	22	36	y	ENSG00000185499.16	MUC1	chr1	protein_coding	mucin 1, cell surface associated
known_NIR_555	chr1	155187544	155188008	-	155187858	155188008	A3SS&ES	ENST00000620103.4	known	0.02	8	404	8	404	y	0	0	272	0	272	n	0	0	280	0	280	n	0.06	22	336	22	336	y	ENSG00000185499.16	MUC1	chr1	protein_coding	mucin 1, cell surface associated
known_NIR_556	chr1	155187544	155188163	-	155188063	155188163	A3SS&ES	ENST00000620103.4	known	0.02	8	450	8	450	y	0	0	276	0	276	n	0	0	276	0	276	n	0.01	4	436	4	436	y	ENSG00000185499.16	MUC1	chr1	protein_coding	mucin 1, cell surface associated
known_NIR_557	chr1	155187544	155192183	-	155188285	155192183	A3SS&ES	ENST00000614519.4	known	-	-	-	-	-	-	0	0	10	0	10	n	0	0	22	0	22	n	0.18	2	9	2	9	y	ENSG00000185499.16	MUC1	chr1	protein_coding	mucin 1, cell surface associated
known_NIR_558	chr1	155187544;155188063	155188008;155188163	-	155187544	155188163	cassetteExon	ENST00000615517.4	known	0.97	229	8	8;450	8	y	1	138	0	0;276	0	n	1	138	0	0;276	0	n	0.98	229	4	22;436	4	y	ENSG00000185499.16	MUC1	chr1	protein_coding	mucin 1, cell surface associated
known_NIR_559	chr1	155187544;155188212	155188008;155192183	-	155187544	155192183	cassetteExon	ENST00000342482.8	known	1	4	0	8;0	0	n	-	-	-	-	-	-	-	-	-	-	-	-	0.88	14.5	2	22;7	2	y	ENSG00000185499.16	MUC1	chr1	protein_coding	mucin 1, cell surface associated
known_NIR_560	chr1	155187544;155188212	155188163;155192183	-	155187544	155192183	cassetteExon	ENST00000342482.8	known	1	4	0	8;0	0	n	-	-	-	-	-	-	-	-	-	-	-	-	0.73	5.5	2	4;7	2	y	ENSG00000185499.16	MUC1	chr1	protein_coding	mucin 1, cell surface associated
known_NIR_561	chr1	155187544;155188231	155188008;155192183	-	155187544	155192183	cassetteExon	ENST00000342482.8	known	1	4	0	8;0	0	n	1	2.5	0	0;5	0	n	1	2	0	0;4	0	n	0.86	12.5	2	22;3	2	y	ENSG00000185499.16	MUC1	chr1	protein_coding	mucin 1, cell surface associated
known_NIR_562	chr1	155187544;155188285	155188008;155192183	-	155187544	155192183	cassetteExon	ENST00000342482.8	known	1	4	0	8;0	0	n	1	5	0	0;10	0	n	1	11	0	0;22	0	n	0.89	15.5	2	22;9	2	y	ENSG00000185499.16	MUC1	chr1	protein_coding	mucin 1, cell surface associated
known_NIR_563	chr1	155187544;155188285	155188163;155192183	-	155187544	155192183	cassetteExon	ENST00000342482.8	known	1	4	0	8;0	0	n	1	5	0	0;10	0	n	1	11	0	0;22	0	n	0.76	6.5	2	4;9	2	y	ENSG00000185499.16	MUC1	chr1	protein_coding	mucin 1, cell surface associated
known_NIR_564	chr1	155187576	155188008	-	155187576;155187858	155187722;155188008	ES	ENST00000620103.4	known	0.09	40	395	40	386;404	y	0.09	29	281	29	290;272	y	0.04	12	303.5	12	327;280	y	0.11	36	297	36	258;336	y	ENSG00000185499.16	MUC1	chr1	protein_coding	mucin 1, cell surface associated
known_NIR_565	chr1	155188231	155192183	-	155188212	155192183	A3SS	ENST00000610359.4	known	-	-	-	-	-	-	1	5	0	5	0	n	1	4	0	4	0	n	0.3	3	7	3	7	y	ENSG00000185499.16	MUC1	chr1	protein_coding	mucin 1, cell surface associated
known_NIR_566	chr1	155188285	155192183	-	155188212	155192183	A3SS	ENST00000610359.4	known	-	-	-	-	-	-	1	10	0	10	0	n	1	22	0	22	0	n	0.56	9	7	9	7	y	ENSG00000185499.16	MUC1	chr1	protein_coding	mucin 1, cell surface associated
known_NIR_567	chr1	155188285	155192183	-	155188231	155192183	A3SS	ENST00000615517.4	known	-	-	-	-	-	-	0.67	10	5	10	5	y	0.85	22	4	22	4	y	0.75	9	3	9	3	y	ENSG00000185499.16	MUC1	chr1	protein_coding	mucin 1, cell surface associated
known_NIR_568	chr1	155192274	155192786	-	155192283	155192786	A3SS	ENST00000620103.4	known	0.26	60	171	60	171	y	0.24	20	64	20	64	y	0.3	35	82	35	82	y	0.4	44	67	44	67	y	ENSG00000185499.16	MUC1	chr1	protein_coding	mucin 1, cell surface associated
known_NIR_569	chr1	155192274	155192786	-	155192310	155192786	A3SS	ENST00000610359.4	known	0.15	60	345	60	345	y	0.09	20	192	20	192	y	0.12	35	258	35	258	y	0.15	44	243	44	243	y	ENSG00000185499.16	MUC1	chr1	protein_coding	mucin 1, cell surface associated
known_NIR_570	chr1	155192310	155192786	-	155192283	155192786	A3SS	ENST00000620103.4	known	0.67	345	171	345	171	y	0.75	192	64	192	64	y	0.76	258	82	258	82	y	0.78	243	67	243	67	y	ENSG00000185499.16	MUC1	chr1	protein_coding	mucin 1, cell surface associated
known_NIR_571	chr1	155202114	155202261	-	155202034	155202261	A3SS	ENST00000368378.7	known	0	0	20	0	20	n	0	0	20	0	20	n	0.18	4	18	4	18	y	0.08	3	36	3	36	y	ENSG00000169231.13	THBS3	chr1	protein_coding	thrombospondin 3
known_NIR_572	chr1	155203305	155204855	-	155203305;155203539	155203513;155204855	ES	ENST00000368378.7	known	0	0	53	0	58;48	n	0.07	2	27.5	2	28;27	y	0	0	34	0	27;41	n	0	0	64	0	67;61	n	ENSG00000169231.13	THBS3	chr1	protein_coding	thrombospondin 3
known_NIR_573	chr1	155203539	155205060	-	155203539;155204957	155204855;155205060	ES	ENST00000368378.7	known	0	0	37.5	0	48;27	n	0	0	35.5	0	27;44	n	0	0	37.5	0	41;34	n	0.15	9	50	9	61;39	y	ENSG00000169231.13	THBS3	chr1	protein_coding	thrombospondin 3
known_NIR_574	chr1	155203539	155206200	-	155203539	155205060	A5SS&ES	ENST00000541990.5	known	-	-	-	-	-	-	-	-	-	-	-	-	-	-	-	-	-	-	0.4	6	9	6	9	y	ENSG00000169231.13	THBS3	chr1	protein_coding	thrombospondin 3
known_NIR_575	chr1	155203539;155205316	155204855;155206200	-	155203539	155206200	cassetteExon	ENST00000457183.6	known	1	49.5	0	48;51	0	n	1	42.5	0	27;58	0	n	1	58	0	41;75	0	n	0.92	72	6	61;83	6	y	ENSG00000169231.13	THBS3	chr1	protein_coding	thrombospondin 3
known_NIR_576	chr1	155203539;155205316	155205060;155206200	-	155203539	155206200	cassetteExon	ENST00000457183.6	known	1	25.5	0	0;51	0	n	1	29	0	0;58	0	n	1	37.5	0	0;75	0	n	0.88	46	6	9;83	6	y	ENSG00000169231.13	THBS3	chr1	protein_coding	thrombospondin 3
known_NIR_577	chr1	155205316	155206193	-	155205316	155206200	A5SS	ENST00000368378.7	known	0	0	51	0	51	n	0.09	6	58	6	58	y	0	0	75	0	75	n	0.02	2	83	2	83	y	ENSG00000169231.13	THBS3	chr1	protein_coding	thrombospondin 3
known_NIR_578	chr1	155210627	155212385	+	155210627;155212219	155212127;155212385	ES	ENST00000368376.7	known	0.14	115	736	115	769;703	y	0.17	133	659	133	703;615	y	0.15	108	600	108	617;583	y	0.15	105	617.5	105	663;572	y	ENSG00000173171.14	MTX1	chr1	protein_coding	metaxin 1
known_NIR_579	chr1	155217373	155217964	-	155217373	155217519	A5SS	ENST00000459805.5	known	1	34	0	34	0	n	0.8	37	9	37	9	y	0.61	22	14	22	14	y	1	12	0	12	0	n	ENSG00000160766.14	GBAP1	chr1	transcribed_unprocessed_pseudogene	glucosidase, beta, acid pseudogene 1
known_NIR_580	chr1	155238650	155239886	-	155238650;155239762	155239616;155239886	ES	ENST00000368373.7	known	0	0	237.5	0	227;248	n	0	0	196.5	0	213;180	n	0.05	13	241	13	253;229	y	0.09	22	216.5	22	249;184	y	ENSG00000177628.15	GBA	chr1	protein_coding	glucosidase, beta, acid
known_NIR_581	chr1	155240077	155240630	-	155240077	155244506	A5SS	ENST00000428024.3	known	1	321	0	321	0	n	0.98	276	5	276	5	y	1	296	0	296	0	n	1	399	0	399	0	n	ENSG00000177628.15	GBA	chr1	protein_coding	glucosidase, beta, acid
known_NIR_582	chr1	155241180	155244506	-	155240077	155244506	A3SS	ENST00000428024.3	known	1	93	0	93	0	n	0.92	54	5	54	5	y	1	39	0	39	0	n	1	54	0	54	0	n	ENSG00000177628.15	GBA	chr1	protein_coding	glucosidase, beta, acid
known_NIR_583	chr1	155251908	155253625	-	155251905	155253625	A3SS	ENST00000350210.6	known	0.11	12	95	12	95	y	0	0	110	0	110	n	0.19	19	81	19	81	y	0.01	2	164	2	164	y	ENSG00000160767.20	FAM189B	chr1	protein_coding	family with sequence similarity 189, member B
known_NIR_584	chr1	155253732;155254194	155253859;155254653	-	155253732	155254653	cassetteExon	ENST00000350210.6	known	0.51	38	37	76;0	37	n	0.57	44.5	33	86;3	33	y	0.65	32	17	64;0	17	n	0.82	50.5	11	101;0	11	n	ENSG00000160767.20	FAM189B	chr1	protein_coding	family with sequence similarity 189, member B
known_NIR_585	chr1	155254194;155254456	155254400;155254653	-	155254194	155254653	cassetteExon	ENST00000368368.7	known	1	17.5	0	19;16	0	n	0.87	19.5	3	19;20	3	y	1	19	0	17;21	0	n	1	32	0	37;27	0	n	ENSG00000160767.20	FAM189B	chr1	protein_coding	family with sequence similarity 189, member B
known_NIR_586	chr1	155254456	155254653	-	155253732	155254653	A3SS	ENST00000350210.6	known	0.3	16	37	16	37	y	0.38	20	33	20	33	y	0.55	21	17	21	17	y	0.71	27	11	27	11	y	ENSG00000160767.20	FAM189B	chr1	protein_coding	family with sequence similarity 189, member B
known_NIR_587	chr1	155260659	155262086	-	155260659;155261734	155261657;155262086	ES	ENST00000302631.7	known	0.51	327	308.5	327	301;316	y	0.59	391	273.5	391	260;287	y	0.48	262	281.5	262	253;310	y	0.59	341	240.5	341	216;265	y	ENSG00000116521.10	SCAMP3	chr1	protein_coding	secretory carrier membrane protein 3
known_NIR_588	chr1	155268795	155269488	-	155268792	155269488	A3SS	ENST00000361168.9	known	0.32	17	36	17	36	y	0.59	19	13	19	13	y	0.47	7	8	7	8	y	0.73	19	7	19	7	y	ENSG00000176444.18	CLK2	chr1	protein_coding	CDC-like kinase 2
known_NIR_589	chr1	15526958	15534237	+	15526958;15529272	15529088;15534237	ES	ENST00000375838.5	known	0	0	8.5	0	6;11	n	0	0	3	0	0;6	n	0.33	6	12	6	15;9	y	0	0	19.5	0	18;21	n	ENSG00000116138.12	DNAJC16	chr1	protein_coding	DnaJ (Hsp40) homolog, subfamily C, member 16
known_NIR_590	chr1	155269713	155270808	-	155269716	155270808	A3SS	ENST00000361168.9	known	0.13	9	60	9	60	y	0.36	54	94	54	94	y	0.22	21	73	21	73	y	0.53	45	40	45	40	y	ENSG00000176444.18	CLK2	chr1	protein_coding	CDC-like kinase 2
known_NIR_591	chr1	155308965	155310043	+	155309965	155310043	A5SS&ES	ENST00000356657.10	known	0.95	1998	112	1998	112	y	0.93	2094	149	2094	149	y	0.95	2224	108	2224	108	y	0.92	2210	180	2210	180	y	ENSG00000160752.14	FDPS	chr1	protein_coding	farnesyl diphosphate synthase
known_NIR_592	chr1	155308965	155310064	+	155308965	155309789	A3SS&ES	ENST00000368356.8	known	0.97	807	25	807	25	y	0.96	775	30	775	30	y	0.94	672	41	672	41	y	0.93	839	65	839	65	y	ENSG00000160752.14	FDPS	chr1	protein_coding	farnesyl diphosphate synthase
known_NIR_593	chr1	155308965	155310064	+	155308965	155310043	A3SS	ENST00000447866.5	known	0.29	807	1998	807	1998	y	0.27	775	2094	775	2094	y	0.23	672	2224	672	2224	y	0.28	839	2210	839	2210	y	ENSG00000160752.14	FDPS	chr1	protein_coding	farnesyl diphosphate synthase
known_NIR_594	chr1	155308965	155312255	+	155310205	155312255	A5SS&ES	ENST00000356657.10	known	0.02	67	3332	67	3332	y	0.02	94	3680	94	3680	y	0.04	144	3146	144	3146	y	0.03	109	3681	109	3681	y	ENSG00000160752.14	FDPS	chr1	protein_coding	farnesyl diphosphate synthase
known_NIR_595	chr1	155308965;155309965	155309789;155310043	+	155308965	155310043	cassetteExon	ENST00000447866.5	known	0.03	68.5	1998	25;112	1998	y	0.04	89.5	2094	30;149	2094	y	0.03	74.5	2224	41;108	2224	y	0.05	122.5	2210	65;180	2210	y	ENSG00000160752.14	FDPS	chr1	protein_coding	farnesyl diphosphate synthase
known_NIR_596	chr1	155308965;155310205	155309789;155312255	+	155308965	155312255	cassetteExon	ENST00000611010.4	known	0.96	1678.5	67	25;3332	67	y	0.95	1855	94	30;3680	94	y	0.92	1593.5	144	41;3146	144	y	0.95	1873	109	65;3681	109	y	ENSG00000160752.14	FDPS	chr1	protein_coding	farnesyl diphosphate synthase
known_NIR_597	chr1	155308965;155310205	155310043;155312255	+	155308965	155312255	cassetteExon	ENST00000611010.4	known	0.98	2665	67	1998;3332	67	y	0.97	2887	94	2094;3680	94	y	0.95	2685	144	2224;3146	144	y	0.96	2945.5	109	2210;3681	109	y	ENSG00000160752.14	FDPS	chr1	protein_coding	farnesyl diphosphate synthase
known_NIR_598	chr1	155308965;155310205	155310064;155312255	+	155308965	155312255	cassetteExon	ENST00000611010.4	known	0.97	2069.5	67	807;3332	67	y	0.96	2227.5	94	775;3680	94	y	0.93	1909	144	672;3146	144	y	0.95	2260	109	839;3681	109	y	ENSG00000160752.14	FDPS	chr1	protein_coding	farnesyl diphosphate synthase
known_NIR_599	chr1	155309076	155309789	+	155308965	155309789	A5SS	ENST00000368356.8	known	0.64	45	25	45	25	y	0.56	38	30	38	30	y	0.33	20	41	20	41	y	0.33	32	65	32	65	y	ENSG00000160752.14	FDPS	chr1	protein_coding	farnesyl diphosphate synthase
known_NIR_600	chr1	155309076	155310064	+	155308965	155310064	A5SS	ENST00000467076.5	known	0.21	219	807	219	807	y	0.18	171	775	171	775	y	0.27	250	672	250	672	y	0.21	220	839	220	839	y	ENSG00000160752.14	FDPS	chr1	protein_coding	farnesyl diphosphate synthase
known_NIR_601	chr1	155309076	155310064	+	155309076	155309789	A3SS&ES	ENST00000356657.10	known	0.83	219	45	219	45	y	0.82	171	38	171	38	y	0.93	250	20	250	20	y	0.87	220	32	220	32	y	ENSG00000160752.14	FDPS	chr1	protein_coding	farnesyl diphosphate synthase
known_NIR_602	chr1	155324544	155324845	+	155323130	155324845	A5SS	ENST00000368354.7	known	1	13	0	13	0	n	1	10	0	10	0	n	1	10	0	10	0	n	0.7	28	12	28	12	y	ENSG00000160753.15	RUSC1	chr1	protein_coding	RUN and SH3 domain containing 1
known_NIR_603	chr1	155324587	155324845	+	155323130	155324845	A5SS	ENST00000368354.7	known	1	45	0	45	0	n	1	45	0	45	0	n	1	39	0	39	0	n	0.88	89	12	89	12	y	ENSG00000160753.15	RUSC1	chr1	protein_coding	RUN and SH3 domain containing 1
known_NIR_604	chr1	155324587	155324845	+	155324544	155324845	A5SS	ENST00000368347.8	known	0.78	45	13	45	13	y	0.82	45	10	45	10	y	0.8	39	10	39	10	y	0.76	89	28	89	28	y	ENSG00000160753.15	RUSC1	chr1	protein_coding	RUN and SH3 domain containing 1
known_NIR_605	chr1	155324809	155325102	+	155324943	155325102	A5SS&ES	ENST00000368354.7	known	0.21	43	166	43	166	y	0.32	77	166	77	166	y	0.53	79	70	79	70	y	0.36	129	232	129	232	y	ENSG00000160753.15	RUSC1	chr1	protein_coding	RUN and SH3 domain containing 1
known_NIR_606	chr1	155325910	155326580	+	155325910	155326898	A3SS	ENST00000368354.7	known	0.79	135	35	135	35	y	0.85	178	32	178	32	y	0.94	149	10	149	10	y	0.88	150	20	150	20	y	ENSG00000160753.15	RUSC1	chr1	protein_coding	RUN and SH3 domain containing 1
known_NIR_607	chr1	155613733	155614059	+	155613766	155614059	A5SS	ENST00000245564.6	known	0.09	8	83	8	83	y	0.12	10	74	10	74	y	0.04	3	67	3	67	y	0.06	6	90	6	90	y	ENSG00000125459.14	MSTO1	chr1	protein_coding	misato 1, mitochondrial distribution and morphology regulator
known_NIR_608	chr1	155668717	155670320	-	155668777	155670320	A3SS	ENST00000368339.9	known	0.27	45	120	45	120	y	0.23	45	155	45	155	y	0.26	61	173	61	173	y	0.28	101	260	101	260	y	ENSG00000163374.19	YY1AP1	chr1	protein_coding	YY1 associated protein 1
known_NIR_609	chr1	15567269	15574760	+	15567269	15567778	3pMXE	ENST00000616884.4	known	0	0	15	0	15	n	0	0	17	0	17	n	0	0	3	0	3	n	0.11	3	25	3	25	y	ENSG00000116138.12	DNAJC16	chr1	protein_coding	DnaJ (Hsp40) homolog, subfamily C, member 16
known_NIR_610	chr1	155679512	155688071	-	155679512;155680456	155680416;155688071	ES	ENST00000368339.9	known	0.04	10	242.5	10	263;222	y	0.07	13	184.5	13	192;177	y	0.1	24	213	24	267;159	y	0.09	24	244.5	24	284;205	y	ENSG00000163374.19	YY1AP1	chr1	protein_coding	YY1 associated protein 1
known_NIR_611	chr1	155679512;155688201	155688071;155688659	-	155679512;155680456	155680416;155688659	MXE	ENST00000347088.9	known	0.3	57.5	134.5	10;105	263;6	y	0.31	45.5	100	13;78	192;8	y	0.23	41	140.5	24;58	267;14	y	0.23	43.5	148	24;63	284;12	y	ENSG00000163374.19	YY1AP1	chr1	protein_coding	YY1 associated protein 1
known_NIR_612	chr1	155679512;155688201	155688071;155688930	-	155679512;155680456	155680416;155688930	MXE	ENST00000368330.6	known	0.12	18.5	134	10;27	263;5	y	0.08	8.5	96	13;4	192;0	n	0.1	15	142	24;6	267;17	y	0.1	16.5	143.5	24;9	284;3	y	ENSG00000163374.19	YY1AP1	chr1	protein_coding	YY1 associated protein 1
known_NIR_613	chr1	155680456	155688659	-	155680456	155688071	5pMXE	ENST00000368339.9	known	0.03	6	222	6	222	y	0.04	8	177	8	177	y	0.08	14	159	14	159	y	0.06	12	205	12	205	y	ENSG00000163374.19	YY1AP1	chr1	protein_coding	YY1 associated protein 1
known_NIR_614	chr1	155680456	155688930	-	155680456	155688071	5pMXE	ENST00000368339.9	known	0.02	5	222	5	222	y	0	0	177	0	177	n	0.1	17	159	17	159	y	0.01	3	205	3	205	y	ENSG00000163374.19	YY1AP1	chr1	protein_coding	YY1 associated protein 1
known_NIR_615	chr1	155680456	155688930	-	155680456	155688659	5pMXE	ENST00000347088.9	known	0.45	5	6	5	6	y	0	0	8	0	8	n	0.55	17	14	17	14	y	0.2	3	12	3	12	y	ENSG00000163374.19	YY1AP1	chr1	protein_coding	YY1 associated protein 1
known_NIR_616	chr1	155680456	155688930	-	155680456;155688201	155688071;155688930	ES	ENST00000295566.8	known	0.04	5	124.5	5	222;27	y	0	0	90.5	0	177;4	n	0.17	17	82.5	17	159;6	y	0.03	3	107	3	205;9	y	ENSG00000163374.19	YY1AP1	chr1	protein_coding	YY1 associated protein 1
known_NIR_617	chr1	155680456;155688201	155688071;155688659	-	155680456	155688659	cassetteExon	ENST00000347088.9	known	0.96	163.5	6	222;105	6	y	0.94	127.5	8	177;78	8	y	0.89	108.5	14	159;58	14	y	0.92	134	12	205;63	12	y	ENSG00000163374.19	YY1AP1	chr1	protein_coding	YY1 associated protein 1
known_NIR_618	chr1	155688201	155688930	-	155688201	155688659	5pMXE	ENST00000361831.9	known	0.2	27	105	27	105	y	0.05	4	78	4	78	y	0.09	6	58	6	58	y	0.12	9	63	9	63	y	ENSG00000163374.19	YY1AP1	chr1	protein_coding	YY1 associated protein 1
known_NIR_619	chr1	155689243	155709773	+	155689174	155709773	A5SS	ENST00000471642.6	known	0.19	96	415	96	415	y	0.3	190	443	190	443	y	0.3	227	538	227	538	y	0.23	148	500	148	500	y	ENSG00000132676.15	DAP3	chr1	protein_coding	death associated protein 3
known_NIR_620	chr1	155709824;155717128	155717006;155721517	+	155709824	155721517	cassetteExon	ENST00000471642.6	known	0.81	513.5	120	520;507	120	y	0.85	762.5	138	807;718	138	y	0.87	765.5	119	867;664	119	y	0.83	663	134	713;613	134	y	ENSG00000132676.15	DAP3	chr1	protein_coding	death associated protein 3
known_NIR_621	chr1	155709824;155717128	155717006;155725382	+	155709824;155721618	155721517;155725382	MXE	ENST00000471642.6	known	0.44	284	358.5	520;48	120;597	y	0.48	425	464	807;43	138;790	y	0.54	462	390	867;57	119;661	y	0.47	368	412.5	713;23	134;691	y	ENSG00000132676.15	DAP3	chr1	protein_coding	death associated protein 3
known_NIR_622	chr1	155717128	155725382	+	155717128	155721517	3pMXE	ENST00000465375.5	known	0.09	48	507	48	507	y	0.06	43	718	43	718	y	0.08	57	664	57	664	y	0.04	23	613	23	613	y	ENSG00000132676.15	DAP3	chr1	protein_coding	death associated protein 3
known_NIR_623	chr1	155717128	155725382	+	155717128;155721618	155721517;155725382	ES	ENST00000368336.9	known	0.08	48	552	48	507;597	y	0.05	43	754	43	718;790	y	0.08	57	662.5	57	664;661	y	0.03	23	652	23	613;691	y	ENSG00000132676.15	DAP3	chr1	protein_coding	death associated protein 3
known_NIR_624	chr1	155752587	155753204	-	155752590	155753204	A3SS	ENST00000368331.5	known	1	40	0	40	0	n	1	29	0	29	0	n	1	41	0	41	0	n	0.97	75	2	75	2	y	ENSG00000116580.18	GON4L	chr1	protein_coding	gon-4-like (C. elegans)
known_NIR_625	chr1	155853806	155857159	-	155853806	155857147	A5SS	ENST00000368331.5	known	-	-	-	-	-	-	0.14	1	6	1	6	n	0	0	24	0	24	n	0.09	4	39	4	39	y	ENSG00000116580.18	GON4L	chr1	protein_coding	gon-4-like (C. elegans)
known_NIR_626	chr1	155853806	155857159	-	155853806	155859304	A5SS	ENST00000615926.4	known	-	-	-	-	-	-	1	1	0	1	0	n	0	0	8	0	8	n	0.33	4	8	4	8	y	ENSG00000116580.18	GON4L	chr1	protein_coding	gon-4-like (C. elegans)
known_NIR_627	chr1	155853806	155859304	-	155853806	155857147	5pMXE	ENST00000368331.5	known	-	-	-	-	-	-	0	0	6	0	6	n	0.25	8	24	8	24	y	0.17	8	39	8	39	y	ENSG00000116580.18	GON4L	chr1	protein_coding	gon-4-like (C. elegans)
known_NIR_628	chr1	155910506	155911243	-	155910506;155910804	155910656;155911243	ES	ENST00000368323.7	known	0	0	106	0	95;117	n	0	0	156	0	116;196	n	0.05	5	92	5	70;114	y	0.11	22	187	22	197;177	y	ENSG00000143622.10	RIT1	chr1	protein_coding	Ras-like without CAAX 1
known_NIR_629	chr1	155910804	155910878	-	155910804	155911243	A5SS	ENST00000368323.7	known	0.06	8	117	8	117	y	0.06	12	196	12	196	y	0	0	114	0	114	n	0.02	3	177	3	177	y	ENSG00000143622.10	RIT1	chr1	protein_coding	Ras-like without CAAX 1
known_NIR_630	chr1	155921527	155921861	-	155921628	155921861	A3SS	ENST00000368321.7	known	0	0	72	0	72	n	0	0	99	0	99	n	0.07	9	125	9	125	y	0.12	18	133	18	133	y	ENSG00000132680.10	KIAA0907	chr1	protein_coding	KIAA0907
known_NIR_631	chr1	155965131	155965303	-	155965128	155965303	A3SS	ENST00000313695.11	known	0.66	91	46	91	46	y	0.62	94	57	94	57	y	0.59	91	62	91	62	y	0.73	106	39	106	39	y	ENSG00000116584.17	ARHGEF2	chr1	protein_coding	Rho/Rac guanine nucleotide exchange factor (GEF) 2
known_NIR_632	chr1	155969300	155978365	-	155969300	155978067	5pMXE	ENST00000313695.11	known	0.82	210	47	210	47	y	0.88	123	16	123	16	y	0.93	144	11	144	11	y	0.93	211	16	211	16	y	ENSG00000116584.17	ARHGEF2	chr1	protein_coding	Rho/Rac guanine nucleotide exchange factor (GEF) 2
known_NIR_633	chr1	155969300	155983107	-	155969300	155978067	5pMXE	ENST00000313695.11	known	0.24	15	47	15	47	y	0.45	13	16	13	16	y	0	0	11	0	11	n	0.47	14	16	14	16	y	ENSG00000116584.17	ARHGEF2	chr1	protein_coding	Rho/Rac guanine nucleotide exchange factor (GEF) 2
known_NIR_634	chr1	155969300	155983107	-	155969300	155978365	5pMXE	ENST00000361247.8	known	0.07	15	210	15	210	y	0.1	13	123	13	123	y	0	0	144	0	144	n	0.06	14	211	14	211	y	ENSG00000116584.17	ARHGEF2	chr1	protein_coding	Rho/Rac guanine nucleotide exchange factor (GEF) 2
known_NIR_635	chr1	156011887	156014961	-	156011887	156020013	A5SS	ENST00000496742.5	known	1	1573	0	1573	0	n	0.98	1542	32	1542	32	y	0.97	1346	37	1346	37	y	0.98	1236	25	1236	25	y	ENSG00000163479.13	SSR2	chr1	protein_coding	signal sequence receptor, beta (translocon-associated protein beta)
known_NIR_636	chr1	156020167	156020727	-	156020167	156020888	A5SS	ENST00000295702.8	known	0.06	66	1006	66	1006	y	0	0	967	0	967	n	0	0	803	0	803	n	0.05	53	913	53	913	y	ENSG00000163479.13	SSR2	chr1	protein_coding	signal sequence receptor, beta (translocon-associated protein beta)
known_NIR_637	chr1	156055425	156058315	+	156055425	156057978	A3SS&ES	ENST00000368302.3	known	0	0	250	0	250	n	0.06	23	387	23	387	y	0.09	32	309	32	309	y	0.02	7	302	7	302	y	ENSG00000116586.11	LAMTOR2	chr1	protein_coding	late endosomal/lysosomal adaptor, MAPK and MTOR activator 2
known_NIR_638	chr1	156055425	156058315	+	156055425;156058067	156057978;156058315	ES	ENST00000368305.8	known	0	0	234.5	0	250;219	n	0.06	23	342	23	387;297	y	0.1	32	284	32	309;259	y	0.02	7	290.5	7	302;279	y	ENSG00000116586.11	LAMTOR2	chr1	protein_coding	late endosomal/lysosomal adaptor, MAPK and MTOR activator 2
known_NIR_639	chr1	156137232	156138488	+	156137232	156137654	3pMXE	ENST00000368301.6	known	0	0	3384	0	3384	n	0.01	17	2955	17	2955	y	0	0	2679	0	2679	n	0.01	22	2896	22	2896	y	ENSG00000160789.19	LMNA	chr1	protein_coding	lamin A/C
known_NIR_640	chr1	156137232;156137743	156137654;156138488	+	156137232	156138488	cassetteExon	ENST00000347559.6	known	1	2469.5	0	3384;1555	0	n	0.99	1982	17	2955;1009	17	y	1	1815.5	0	2679;952	0	n	0.99	2095.5	22	2896;1295	22	y	ENSG00000160789.19	LMNA	chr1	protein_coding	lamin A/C
known_NIR_641	chr1	156138607	156139080	+	156138757	156139080	A5SS	ENST00000347559.6	known	0	0	694	0	694	n	0	3	695	3	695	y	0	0	699	0	699	n	0	0	810	0	810	n	ENSG00000160789.19	LMNA	chr1	protein_coding	lamin A/C
known_NIR_642	chr1	156213176	156225557	+	156213176	156236288	A3SS	ENST00000567140.2	known	1	8	0	8	0	n	1	21	0	21	0	n	-	-	-	-	-	-	0.55	6	5	6	5	y	ENSG00000260238.5	PMF1-BGLAP	chr1	protein_coding	PMF1-BGLAP readthrough
known_NIR_643	chr1	156213176	156232320	+	156213176	156236288	A3SS	ENST00000567140.2	known	1	467	0	467	0	n	1	727	0	727	0	n	1	554	0	554	0	n	0.99	483	5	483	5	y	ENSG00000260238.5	PMF1-BGLAP	chr1	protein_coding	PMF1-BGLAP readthrough
known_NIR_644	chr1	156213176;156225668	156225557;156233628	+	156213176;156232425	156232320;156233628	MXE	ENST00000490491.5	known	0.02	10	540.5	8;12	467;614	y	0.02	10.5	670	21;0	727;613	n	0.02	7.5	442.5	0;15	554;331	n	0.02	10.5	429	6;15	483;375	y	ENSG00000260238.5	PMF1-BGLAP	chr1	protein_coding	PMF1-BGLAP readthrough
known_NIR_645	chr1	156233728	156236288	+	156213176	156236288	A5SS	ENST00000567140.2	known	1	741	0	741	0	n	1	626	0	626	0	n	1	433	0	433	0	n	0.99	495	5	495	5	y	ENSG00000260238.5	PMF1-BGLAP	chr1	protein_coding	PMF1-BGLAP readthrough
known_NIR_646	chr1	156233728	156236349	+	156233728	156236288	A3SS	ENST00000490491.5	known	0	0	741	0	741	n	0	0	626	0	626	n	0.01	4	433	4	433	y	0.01	7	495	7	495	y	ENSG00000260238.5	PMF1-BGLAP	chr1	protein_coding	PMF1-BGLAP readthrough
known_NIR_647	chr1	156236483	156239548	+	156236483	156242553	A3SS	ENST00000490491.5	known	0.95	481	24	481	24	y	0.92	558	51	558	51	y	0.95	397	23	397	23	y	0.89	451	53	451	53	y	ENSG00000260238.5	PMF1-BGLAP	chr1	protein_coding	PMF1-BGLAP readthrough
known_NIR_648	chr1	156242295	156242553	+	156236483	156242553	A5SS	ENST00000490491.5	known	0	0	24	0	24	n	0	0	51	0	51	n	0	0	23	0	23	n	0.05	3	53	3	53	y	ENSG00000260238.5	PMF1-BGLAP	chr1	protein_coding	PMF1-BGLAP readthrough
known_NIR_649	chr1	156244403	156244690	-	156244403	156244761	A5SS	ENST00000623241.3	known	0	0	12	0	12	n	0	0	6	0	6	n	0.07	1	13	1	13	n	0.2	2	8	2	8	y	ENSG00000160781.15	PAQR6	chr1	protein_coding	progestin and adipoQ receptor family member VI
known_NIR_650	chr1	156284406	156285184	+	156283065	156285184	A5SS	ENST00000295694.9	known	0	0	43	0	43	n	0	0	91	0	91	n	0.04	5	121	5	121	y	0	0	60	0	60	n	ENSG00000163472.18	TMEM79	chr1	protein_coding	transmembrane protein 79
known_NIR_651	chr1	156285267	156286260	+	156285983	156286260	A5SS	ENST00000295694.9	known	0	0	30	0	30	n	0.23	9	31	9	31	y	0.17	5	24	5	24	y	0.17	8	38	8	38	y	ENSG00000163472.18	TMEM79	chr1	protein_coding	transmembrane protein 79
known_NIR_652	chr1	156293209;156293576	156293320;156294018	-	156293209	156294018	cassetteExon	ENST00000612353.4	known	0.61	132.5	84	117;148	84	y	0.88	199	28	221;177	28	y	0.77	190	58	216;164	58	y	0.76	211.5	67	189;234	67	y	ENSG00000198715.11	GLMP	chr1	protein_coding	glycosylated lysosomal membrane protein
known_NIR_653	chr1	156294565	156295526	-	156294565	156294759	A5SS&ES	ENST00000614643.4	known	0.44	103	130	103	130	y	0.2	65	259	65	259	y	0.4	113	170	113	170	y	0.42	147	204	147	204	y	ENSG00000198715.11	GLMP	chr1	protein_coding	glycosylated lysosomal membrane protein
known_NIR_654	chr1	156294565	156295526	-	156294565;156295016	156294759;156295526	ES	ENST00000612353.4	known	0.34	103	199	103	130;268	y	0.21	65	248	65	259;237	y	0.34	113	220	113	170;270	y	0.35	147	270	147	204;336	y	ENSG00000198715.11	GLMP	chr1	protein_coding	glycosylated lysosomal membrane protein
known_NIR_655	chr1	156333643;156334918	156334713;156335827	-	156333643	156335827	cassetteExon	ENST00000368259.6	known	0.96	3060.5	114	2760;3361	114	y	0.97	3665.5	102	3671;3660	102	y	0.95	3326.5	179	3169;3484	179	y	0.96	3382.5	137	3060;3705	137	y	ENSG00000163468.14	CCT3	chr1	protein_coding	chaperonin containing TCP1, subunit 3 (gamma)
known_NIR_656	chr1	156335888;156337789	156337677;156338154	-	156335888	156338154	cassetteExon	ENST00000295688.7	known	0	14.5	3068	16;13	3068	y	0	6.5	2884	13;0	2884	n	0	1.5	3101	3;0	3101	n	0	11	3130	12;10	3130	y	ENSG00000163468.14	CCT3	chr1	protein_coding	chaperonin containing TCP1, subunit 3 (gamma)
known_NIR_657	chr1	156475237;156476514	156476494;156477012	-	156475237	156477012	cassetteExon	ENST00000464356.6	known	0.11	18	153	18;18	153	y	0.07	12	156	16;8	156	y	0.38	72.5	120	70;75	120	y	0.15	30.5	167	30;31	167	y	ENSG00000116604.17	MEF2D	chr1	protein_coding	myocyte enhancer factor 2D
known_NIR_658	chr1	156479346	156480834	-	156479346;156479796	156479586;156480834	ES	ENST00000348159.8	known	0	0	218.5	0	186;251	n	0	0	164.5	0	87;242	n	0	0	134	0	102;166	n	0.04	9	247	9	193;301	y	ENSG00000116604.17	MEF2D	chr1	protein_coding	myocyte enhancer factor 2D
known_NIR_659	chr1	156479346;156480971	156480834;156482437	-	156479346;156480777	156479586;156482437	MXE	ENST00000464356.6	known	0.44	72.5	93	0;145	186;0	n	0.55	53	43.5	0;106	87;0	n	0.53	58.5	51	0;117	102;0	n	0.53	108.5	98	9;208	193;3	y	ENSG00000116604.17	MEF2D	chr1	protein_coding	myocyte enhancer factor 2D
known_NIR_660	chr1	156480777	156482437	-	156480971	156482437	A3SS&ES	ENST00000368240.6	known	0	0	145	0	145	n	0	0	106	0	106	n	0	0	117	0	117	n	0.01	3	208	3	208	y	ENSG00000116604.17	MEF2D	chr1	protein_coding	myocyte enhancer factor 2D
known_NIR_661	chr1	156592670	156593408	+	156592670	156593464	A3SS	ENST00000368234.7	known	0.99	692	10	692	10	y	1	749	0	749	0	n	0.98	567	10	567	10	y	1	705	3	705	3	y	ENSG00000163382.11	APOA1BP	chr1	protein_coding	apolipoprotein A-I binding protein
known_NIR_662	chr1	156599030	156601409	-	156599104	156601409	A3SS	ENST00000368232.8	known	0.1	20	173	20	173	y	0	0	185	0	185	n	0	0	248	0	248	n	0.01	3	243	3	243	y	ENSG00000160818.16	GPATCH4	chr1	protein_coding	G patch domain containing 4
known_NIR_663	chr1	156705503	156705709	-	156705546	156705709	A3SS	ENST00000621784.4	known	0.12	2	14	2	14	y	1	2	0	2	0	n	-	-	-	-	-	-	-	-	-	-	-	-	ENSG00000143320.8	CRABP2	chr1	protein_coding	cellular retinoic acid binding protein 2
known_NIR_664	chr1	156732473	156733377	+	156732473	156732985	3pMXE	ENST00000524343.1	known	0	0	88	0	88	n	0.03	3	96	3	96	y	0	0	49	0	49	n	0	0	110	0	110	n	ENSG00000143303.11	RRNAD1	chr1	protein_coding	ribosomal RNA adenine dimethylase domain containing 1
known_NIR_665	chr1	156732473	156733377	+	156732473;156733047	156732985;156733377	ES	ENST00000368218.8	known	0	0	112.5	0	88;137	n	0.03	3	110	3	96;124	y	0	0	67	0	49;85	n	0	0	133.5	0	110;157	n	ENSG00000143303.11	RRNAD1	chr1	protein_coding	ribosomal RNA adenine dimethylase domain containing 1
known_NIR_666	chr1	156733520;156734493	156734009;156735725	+	156733520	156735725	cassetteExon	ENST00000368218.8	known	0.9	75	8	121;29	8	y	0.83	68	14	98;38	14	y	0.84	32	6	38;26	6	y	0.85	77	14	86;68	14	y	ENSG00000143303.11	RRNAD1	chr1	protein_coding	ribosomal RNA adenine dimethylase domain containing 1
known_NIR_667	chr1	156738764	156741053	-	156738764	156741012	A5SS	ENST00000361531.6	known	0.46	261	308	261	308	y	0.42	285	390	285	390	y	0.49	251	259	251	259	y	0.46	221	262	221	262	y	ENSG00000143314.12	MRPL24	chr1	protein_coding	mitochondrial ribosomal protein L24
known_NIR_668	chr1	156745373	156752038	-	156745373	156751343	5pMXE	ENST00000357325.9	known	0.04	95	2109	95	2109	y	0.03	66	2417	66	2417	y	0.04	98	2308	98	2308	y	0.04	102	2368	102	2368	y	ENSG00000143321.18	HDGF	chr1	protein_coding	hepatoma-derived growth factor
known_NIR_669	chr1	156745373	156752229	-	156745373	156751343	5pMXE	ENST00000357325.9	known	0.06	128	2109	128	2109	y	0.04	107	2417	107	2417	y	0.07	185	2308	185	2308	y	0.05	117	2368	117	2368	y	ENSG00000143321.18	HDGF	chr1	protein_coding	hepatoma-derived growth factor
known_NIR_670	chr1	156745373	156752229	-	156745373	156752038	A5SS	ENST00000368209.9	known	0.57	128	95	128	95	y	0.62	107	66	107	66	y	0.65	185	98	185	98	y	0.53	117	102	117	102	y	ENSG00000143321.18	HDGF	chr1	protein_coding	hepatoma-derived growth factor
known_NIR_671	chr1	156814324	156815037	-	156814294	156815037	A3SS	ENST00000368198.7	known	0.08	13	145	13	145	y	0.08	10	112	10	112	y	0	0	89	0	89	n	0	0	81	0	81	n	ENSG00000027869.11	SH2D2A	chr1	protein_coding	SH2 domain containing 2A
known_NIR_672	chr1	156816094	156816675	-	156816063	156816675	A3SS	ENST00000368198.7	known	0.86	160	27	160	27	y	0.81	116	28	116	28	y	0.92	112	10	112	10	y	0.78	58	16	58	16	y	ENSG00000027869.11	SH2D2A	chr1	protein_coding	SH2 domain containing 2A
known_NIR_673	chr1	156970043	156976983	-	156970043;156971816	156971697;156976983	ES	ENST00000368194.7	known	0.77	48	14	48	14;14	y	0.45	9	11	9	8;14	y	0.14	4	24.5	4	32;17	y	0.64	37	20.5	37	24;17	y	ENSG00000132694.18	ARHGEF11	chr1	protein_coding	Rho guanine nucleotide exchange factor (GEF) 11
known_NIR_674	chr1	15719920	15725317	+	15719920;15721388	15721329;15725317	ES	ENST00000375799.7	known	0.49	96	101	96	108;94	y	0.41	65	92.5	65	100;85	y	0.46	54	64	54	62;66	y	0.35	75	139.5	75	124;155	y	ENSG00000116786.11	PLEKHM2	chr1	protein_coding	pleckstrin homology domain containing, family M (with RUN domain) member 2
known_NIR_675	chr1	15765233	15767376	+	15765233	15770409	A3SS	ENST00000332305.5	known	1	82	0	82	0	n	1	64	0	64	0	n	1	24	0	24	0	n	0.94	46	3	46	3	y	ENSG00000162458.12	FBLIM1	chr1	protein_coding	filamin binding LIM protein 1
known_NIR_676	chr1	15768630	15770409	+	15765233	15770409	A5SS	ENST00000332305.5	known	1	36	0	36	0	n	1	27	0	27	0	n	1	18	0	18	0	n	0.89	24	3	24	3	y	ENSG00000162458.12	FBLIM1	chr1	protein_coding	filamin binding LIM protein 1
known_NIR_677	chr1	157993728	158076113	+	157993728	158084422	A3SS	ENST00000368173.7	known	1	111	0	111	0	n	0.97	109	3	109	3	y	0.95	62	3	62	3	y	1	153	0	153	0	n	ENSG00000183853.17	KIRREL	chr1	protein_coding	kin of IRRE like (Drosophila)
known_NIR_678	chr1	158078140	158084422	+	157993728	158084422	A5SS	ENST00000368173.7	known	1	194	0	194	0	n	0.99	256	3	256	3	y	0.99	230	3	230	3	y	1	279	0	279	0	n	ENSG00000183853.17	KIRREL	chr1	protein_coding	kin of IRRE like (Drosophila)
known_NIR_679	chr1	158088454	158089454	+	158088454	158089502	A3SS	ENST00000360089.8	known	0.79	227	62	227	62	y	0.74	127	45	127	45	y	0.78	200	57	200	57	y	0.55	168	137	168	137	y	ENSG00000183853.17	KIRREL	chr1	protein_coding	kin of IRRE like (Drosophila)
known_NIR_680	chr1	159032691	159051679	+	159032691;159045464	159045297;159051679	ES	ENST00000340979.10	known	0.28	4	10.5	4	12;9	y	0	0	10	0	0;20	n	0.06	2	33.5	2	19;48	y	0	0	17	0	6;28	n	ENSG00000163565.18	IFI16	chr1	protein_coding	interferon, gamma-inducible protein 16
known_NIR_681	chr1	159032691	159051679	+	159032691;159049599	159049432;159051679	ES	ENST00000368132.7	known	0.28	4	10.5	4	12;9	y	0	0	10.5	0	0;21	n	0.05	2	36.5	2	31;42	y	0	0	17	0	9;25	n	ENSG00000163565.18	IFI16	chr1	protein_coding	interferon, gamma-inducible protein 16
known_NIR_682	chr1	159032691;159049599	159049432;159051679	+	159032691;159045464	159045297;159051679	MXE	ENST00000340979.10	known	0.5	10.5	10.5	12;9	12;9	y	0.51	10.5	10	0;21	0;20	n	0.52	36.5	33.5	31;42	19;48	y	0.5	17	17	9;25	6;28	y	ENSG00000163565.18	IFI16	chr1	protein_coding	interferon, gamma-inducible protein 16
known_NIR_683	chr1	15942441	15942529	-	15942420	15942529	A3SS	ENST00000375743.8	known	0	0	45	0	45	n	0.26	18	50	18	50	y	0	0	61	0	61	n	0.06	4	66	4	66	y	ENSG00000116809.11	ZBTB17	chr1	protein_coding	zinc finger and BTB domain containing 17
known_NIR_684	chr1	15946316	15946935	-	15946294	15946935	A3SS	ENST00000375743.8	known	0.18	15	70	15	70	y	0	0	60	0	60	n	0	0	50	0	50	n	0.02	1	43	1	43	n	ENSG00000116809.11	ZBTB17	chr1	protein_coding	zinc finger and BTB domain containing 17
known_NIR_685	chr1	159920537	159924494	-	159920537	159923436	5pMXE	ENST00000368096.5	known	0.41	52	75	52	75	y	0.5	22	22	22	22	y	-	-	-	-	-	-	1	29	0	29	0	n	ENSG00000158710.14	TAGLN2	chr1	protein_coding	transgelin 2
known_NIR_686	chr1	159920537	159924494	-	159920537	159925450	A5SS	ENST00000368097.8	known	0.02	52	2892	52	2892	y	0.01	22	2873	22	2873	y	0	0	2414	0	2414	n	0.01	29	2758	29	2758	y	ENSG00000158710.14	TAGLN2	chr1	protein_coding	transgelin 2
known_NIR_687	chr1	159920537	159925450	-	159920537	159923436	5pMXE	ENST00000368096.5	known	0.97	2892	75	2892	75	y	0.99	2873	22	2873	22	y	1	2414	0	2414	0	n	1	2758	0	2758	0	n	ENSG00000158710.14	TAGLN2	chr1	protein_coding	transgelin 2
known_NIR_688	chr1	160091631	160091808	-	160091608	160091808	A3SS	ENST00000314485.11	known	0	0	101	0	101	n	0.21	19	72	19	72	y	0.13	6	40	6	40	y	0.16	12	63	12	63	y	ENSG00000162729.13	IGSF8	chr1	protein_coding	immunoglobulin superfamily, member 8
known_NIR_689	chr1	16015759	16017074	-	16015759	16017089	A5SS	ENST00000411503.5	known	0.92	196	16	196	16	y	1	139	0	139	0	n	0.97	130	4	130	4	y	0.99	157	2	157	2	y	ENSG00000173641.17	HSPB7	chr1	protein_coding	heat shock 27kDa protein family, member 7 (cardiovascular)
known_NIR_690	chr1	16017219	16017765	-	16017207	16017765	A3SS	ENST00000411503.5	known	0.12	19	143	19	143	y	0.01	2	153	2	153	y	0.04	7	173	7	173	y	0.11	26	218	26	218	y	ENSG00000173641.17	HSPB7	chr1	protein_coding	heat shock 27kDa protein family, member 7 (cardiovascular)
known_NIR_691	chr1	16017219	16017765	-	16017222	16017765	A3SS	ENST00000487046.1	known	0.16	19	99	19	99	y	0.07	2	25	2	25	y	0.16	7	37	7	37	y	0.27	26	69	26	69	y	ENSG00000173641.17	HSPB7	chr1	protein_coding	heat shock 27kDa protein family, member 7 (cardiovascular)
known_NIR_692	chr1	16017222	16017765	-	16017207	16017765	A3SS	ENST00000411503.5	known	0.41	99	143	99	143	y	0.14	25	153	25	153	y	0.18	37	173	37	173	y	0.24	69	218	69	218	y	ENSG00000173641.17	HSPB7	chr1	protein_coding	heat shock 27kDa protein family, member 7 (cardiovascular)
known_NIR_693	chr1	160205522	160207133	+	160205522	160211543	A3SS	ENST00000360472.8	known	0.03	17	589	17	589	y	0.03	20	647	20	647	y	0.06	31	457	31	457	y	0.03	14	499	14	499	y	ENSG00000162734.12	PEA15	chr1	protein_coding	phosphoprotein enriched in astrocytes 15
known_NIR_694	chr1	160208665	160211543	+	160205522	160211543	A5SS	ENST00000360472.8	known	0.04	26	589	26	589	y	0.07	48	647	48	647	y	0.13	66	457	66	457	y	0.15	90	499	90	499	y	ENSG00000162734.12	PEA15	chr1	protein_coding	phosphoprotein enriched in astrocytes 15
known_NIR_695	chr1	160211650	160213110	+	160211716	160213110	A5SS	ENST00000360472.8	known	0.02	25	1172	25	1172	y	0.02	17	1027	17	1027	y	0.01	9	992	9	992	y	0.02	26	1096	26	1096	y	ENSG00000162734.12	PEA15	chr1	protein_coding	phosphoprotein enriched in astrocytes 15
known_NIR_696	chr1	160244034	160261285	-	160244034	160278131	A5SS	ENST00000556710.5	known	1	31	0	31	0	n	1	36	0	36	0	n	0.9	109	12	109	12	y	1	100	0	100	0	n	ENSG00000258465.6	RP11-574F21.3	chr1	protein_coding		--
known_NIR_697	chr1	160261325	160262276	-	160261358	160262276	A3SS	ENST00000326837.6	known	0	0	29	0	29	n	0	0	6	0	6	n	0	0	19	0	19	n	0.06	2	32	2	32	y	ENSG00000132716.18	DCAF8	chr1	protein_coding	DDB1 and CUL4 associated factor 8
known_NIR_698	chr1	160261358	160262276	-	160261358	160262117	A5SS	ENST00000368073.7	known	0.69	29	13	29	13	y	0.25	6	18	6	18	y	0.45	19	23	19	23	y	0.44	32	40	32	40	y	ENSG00000132716.18	DCAF8	chr1	protein_coding	DDB1 and CUL4 associated factor 8
known_NIR_699	chr1	160261358	160262449	-	160261358	160262117	A5SS	ENST00000368073.7	known	0.24	4	13	4	13	y	0	0	18	0	18	n	0.48	21	23	21	23	y	0.44	32	40	32	40	y	ENSG00000132716.18	DCAF8	chr1	protein_coding	DDB1 and CUL4 associated factor 8
known_NIR_700	chr1	160261358	160262449	-	160261358	160262276	A5SS	ENST00000326837.6	known	0.12	4	29	4	29	y	0	0	6	0	6	n	0.53	21	19	21	19	y	0.5	32	32	32	32	y	ENSG00000132716.18	DCAF8	chr1	protein_coding	DDB1 and CUL4 associated factor 8
known_NIR_701	chr1	160282200;160282502	160282417;160282944	-	160282200	160282944	cassetteExon	ENST00000556710.5	known	1	165	0	145;185	0	n	0.98	262	4	261;263	4	y	1	182.5	0	161;204	0	n	1	267.5	0	240;295	0	n	ENSG00000258465.6	RP11-574F21.3	chr1	protein_coding		--
known_NIR_702	chr1	160283109;160283639	160283530;160285055	-	160283109	160285055	cassetteExon	ENST00000556710.5	known	0.87	213	32	217;209	32	y	0.88	232	33	244;220	33	y	0.88	212.5	29	191;234	29	y	0.88	223	29	232;214	29	y	ENSG00000258465.6	RP11-574F21.3	chr1	protein_coding		--
known_NIR_703	chr1	160305571	160305688	-	160305598	160305688	A3SS	ENST00000368069.7	known	0.97	712	19	712	19	y	0.94	605	41	605	41	y	0.95	861	42	861	42	y	0.98	934	23	934	23	y	ENSG00000122218.14	COPA	chr1	protein_coding	coatomer protein complex, subunit alpha
known_NIR_704	chr1	161041411	161041735	-	161041411	161041651	A5SS	ENST00000368020.5	known	0	0	137	0	137	n	0.04	8	187	8	187	y	0	0	125	0	125	n	0	0	123	0	123	n	ENSG00000158773.14	USF1	chr1	protein_coding	upstream transcription factor 1
known_NIR_705	chr1	161118225	161118786	+	161118178	161118786	A5SS	ENST00000368009.6	known	0.02	2	91	2	91	y	0.05	2	41	2	41	y	0	0	22	0	22	n	0.06	6	95	6	95	y	ENSG00000158793.13	NIT1	chr1	protein_coding	nitrilase 1
known_NIR_706	chr1	161120232	161124141	+	161120232	161120499	3pMXE	ENST00000368009.6	known	0	0	83	0	83	n	0	0	171	0	171	n	0.05	6	106	6	106	y	0	0	92	0	92	n	ENSG00000158793.13	NIT1	chr1	protein_coding	nitrilase 1
known_NIR_707	chr1	161124526	161132551	-	161124526	161130815	5pMXE	ENST00000368005.5	known	0.04	4	91	4	91	y	0	0	149	0	149	n	0	0	121	0	121	n	0	0	171	0	171	n	ENSG00000158796.16	DEDD	chr1	protein_coding	death effector domain containing
known_NIR_708	chr1	161124526	161132551	-	161124526;161130847	161130815;161132551	ES	ENST00000368006.7	known	0.06	4	66.5	4	91;42	y	0	0	99.5	0	149;50	n	0	0	90	0	121;59	n	0	0	118.5	0	171;66	n	ENSG00000158796.16	DEDD	chr1	protein_coding	death effector domain containing
known_NIR_709	chr1	161124526;161130843	161130815;161132551	-	161124526	161132551	cassetteExon	ENST00000545495.5	known	0.92	47.5	4	91;4	4	y	1	74.5	0	149;0	0	n	1	60.5	0	121;0	0	n	1	86	0	171;1	0	n	ENSG00000158796.16	DEDD	chr1	protein_coding	death effector domain containing
known_NIR_710	chr1	161130843	161132551	-	161130847	161132551	A3SS	ENST00000368006.7	known	0.09	4	42	4	42	y	0	0	50	0	50	n	0	0	59	0	59	n	0.01	1	66	1	66	n	ENSG00000158796.16	DEDD	chr1	protein_coding	death effector domain containing
known_NIR_711	chr1	161130847	161132391	-	161130847	161132551	A5SS	ENST00000368006.7	known	0.05	2	42	2	42	y	0.21	13	50	13	50	y	0.33	29	59	29	59	y	0.28	26	66	26	66	y	ENSG00000158796.16	DEDD	chr1	protein_coding	death effector domain containing
known_NIR_712	chr1	161159678	161160620	+	161159678;161160506	161160366;161160620	ES	ENST00000368002.7	known	0.28	12	30.5	12	18;43	y	0.81	29	7	29	0;14	n	0.78	36	10	36	1;19	n	0.68	69	33	69	5;61	y	ENSG00000143258.15	USP21	chr1	protein_coding	ubiquitin specific peptidase 21
known_NIR_713	chr1	161166672	161166840	+	161166611	161166840	A5SS	ENST00000352210.9	known	0.71	42	17	42	17	y	1	10	0	10	0	n	1	9	0	9	0	n	0.55	6	5	6	5	y	ENSG00000143224.17	PPOX	chr1	protein_coding	protoporphyrinogen oxidase
known_NIR_714	chr1	161170769	161170907	+	161170769	161176849	A3SS	ENST00000535223.5	known	1	17	0	17	0	n	1	16	0	16	0	n	1	33	0	33	0	n	0.67	31	15	31	15	y	ENSG00000143224.17	PPOX	chr1	protein_coding	protoporphyrinogen oxidase
known_NIR_715	chr1	161176095	161176434	-	161176074	161176434	A3SS	ENST00000319769.9	known	0.47	75	85	75	85	y	0.58	87	64	87	64	y	0.27	37	98	37	98	y	0.32	65	136	65	136	y	ENSG00000158850.14	B4GALT3	chr1	protein_coding	UDP-Gal:betaGlcNAc beta 1,4- galactosyltransferase, polypeptide 3
known_NIR_716	chr1	161176508	161177423	-	161176579	161177423	A3SS	ENST00000319769.9	known	0.21	28	104	28	104	y	0	0	134	0	134	n	0	0	91	0	91	n	0.05	6	124	6	124	y	ENSG00000158850.14	B4GALT3	chr1	protein_coding	UDP-Gal:betaGlcNAc beta 1,4- galactosyltransferase, polypeptide 3
known_NIR_717	chr1	161227350;161227737	161227636;161227884	+	161227350	161227884	cassetteExon	ENST00000545897.5	known	0.97	73.5	2	82;65	2	y	1	56	0	61;51	0	n	1	43	0	30;56	0	n	1	34	0	18;50	0	n	ENSG00000158882.12	TOMM40L	chr1	protein_coding	translocase of outer mitochondrial membrane 40 homolog (yeast)-like
known_NIR_718	chr1	161314425	161340594	+	161314425;161323670	161323614;161340594	ES	ENST00000432287.6	known	0.08	22	237.5	22	426;49	y	0.11	33	272.5	33	495;50	y	0.01	2	221	2	378;64	y	0	0	260.5	0	424;97	n	ENSG00000143252.14	SDHC	chr1	protein_coding	succinate dehydrogenase complex, subunit C, integral membrane protein, 15kDa
known_NIR_719	chr1	161323670	161340594	+	161323670;161328497	161328396;161340594	ES	ENST00000367975.6	known	0.07	49	615	49	685;545	y	0.06	50	802	50	811;793	y	0.09	64	642.5	64	655;630	y	0.12	97	696	97	650;742	y	ENSG00000143252.14	SDHC	chr1	protein_coding	succinate dehydrogenase complex, subunit C, integral membrane protein, 15kDa
known_NIR_720	chr1	161328497	161340594	+	161314425	161340594	A5SS	ENST00000392169.6	known	0.96	545	22	545	22	y	0.96	793	33	793	33	y	1	630	2	630	2	y	1	742	0	742	0	n	ENSG00000143252.14	SDHC	chr1	protein_coding	succinate dehydrogenase complex, subunit C, integral membrane protein, 15kDa
known_NIR_721	chr1	161340655	161362329	+	161340655;161356840	161356677;161362329	ES	ENST00000367975.6	known	0.1	63	600	63	556;644	y	0.05	43	832.5	43	860;805	y	0.1	71	659	71	696;622	y	0.07	61	871.5	61	931;812	y	ENSG00000143252.14	SDHC	chr1	protein_coding	succinate dehydrogenase complex, subunit C, integral membrane protein, 15kDa
known_NIR_722	chr1	1616100	1616508	+	1615633	1616508	A5SS	ENST00000520777.5	known	0.15	3	17	3	17	y	0.63	17	10	17	10	y	1	10	0	10	0	n	0.64	9	5	9	5	y	ENSG00000197530.12	MIB2	chr1	protein_coding	mindbomb E3 ubiquitin protein ligase 2
known_NIR_723	chr1	1616614	1623431	+	1616614	1623389	A3SS	ENST00000520777.5	known	0.19	3	13	3	13	y	0.62	5	3	5	3	n	0.18	3	14	3	14	y	0.23	6	20	6	20	y	ENSG00000197530.12	MIB2	chr1	protein_coding	mindbomb E3 ubiquitin protein ligase 2
known_NIR_724	chr1	162000341	162006297	-	162000338	162006297	A3SS	ENST00000294794.7	known	0.05	6	108	6	108	y	0.05	6	109	6	109	y	0.13	16	111	16	111	y	0.14	20	128	20	128	y	ENSG00000162745.10	OLFML2B	chr1	protein_coding	olfactomedin-like 2B
known_NIR_725	chr1	162287436	162300633	+	162287436	162300648	A3SS	ENST00000530878.5	known	0.33	4	8	4	8	y	0.5	8	8	8	8	y	0.17	8	39	8	39	y	0.42	21	29	21	29	y	ENSG00000198929.12	NOS1AP	chr1	protein_coding	nitric oxide synthase 1 (neuronal) adaptor protein
known_NIR_726	chr1	1624901	1625286	+	1624901;1625185	1624991;1625286	ES	ENST00000520777.5	known	0	0	25	0	34;16	n	0.56	7	5.5	7	2;9	y	0	0	38.5	0	27;50	n	0	0	19	0	10;28	n	ENSG00000197530.12	MIB2	chr1	protein_coding	mindbomb E3 ubiquitin protein ligase 2
known_NIR_727	chr1	162512823	162522404	+	162512823;162518190	162518102;162522404	ES	ENST00000545294.5	known	0	0	45.5	0	44;47	n	0.05	5	89	5	71;107	y	0	0	183	0	179;187	n	0.03	4	144.5	4	159;130	y	ENSG00000152332.15	UHMK1	chr1	protein_coding	U2AF homology motif (UHM) kinase 1
known_NIR_728	chr1	1625428	1625546	+	1625428	1625558	A3SS	ENST00000520777.5	known	1	14	0	14	0	n	1	12	0	12	0	n	0.68	15	7	15	7	y	0.83	20	4	20	4	y	ENSG00000197530.12	MIB2	chr1	protein_coding	mindbomb E3 ubiquitin protein ligase 2
known_NIR_729	chr1	1625428	1626650	+	1625428;1625653	1625546;1626650	ES	ENST00000355826.9	known	0	0	7	0	14;0	n	0	0	19	0	12;26	n	0.24	6	18.5	6	15;22	y	0	0	17	0	20;14	n	ENSG00000197530.12	MIB2	chr1	protein_coding	mindbomb E3 ubiquitin protein ligase 2
known_NIR_730	chr1	1625428	1626650	+	1625428;1625653	1625558;1626650	ES	ENST00000520777.5	known	-	-	-	-	-	-	0	0	13	0	0;26	n	0.29	6	14.5	6	7;22	y	0	0	9	0	4;14	n	ENSG00000197530.12	MIB2	chr1	protein_coding	mindbomb E3 ubiquitin protein ligase 2
known_NIR_731	chr1	162590511	162592735	+	162590511	162592732	A3SS	ENST00000271469.7	known	0.31	105	233	105	233	y	0.27	98	266	98	266	y	0.33	186	386	186	386	y	0.31	158	349	158	349	y	ENSG00000117143.13	UAP1	chr1	protein_coding	UDP-N-acetylglucosamine pyrophosphorylase 1
known_NIR_732	chr1	162590511	162597792	+	162590511;162592782	162592732;162597792	ES	ENST00000271469.7	known	0.25	86	259	86	233;285	y	0.26	105	302	105	266;338	y	0.31	194	430.5	194	386;475	y	0.2	98	385	98	349;421	y	ENSG00000117143.13	UAP1	chr1	protein_coding	UDP-N-acetylglucosamine pyrophosphorylase 1
known_NIR_733	chr1	162590511;162592782	162592735;162597792	+	162590511	162597792	cassetteExon	ENST00000367926.8	known	0.69	195	86	105;285	86	y	0.67	218	105	98;338	105	y	0.63	330.5	194	186;475	194	y	0.75	289.5	98	158;421	98	y	ENSG00000117143.13	UAP1	chr1	protein_coding	UDP-N-acetylglucosamine pyrophosphorylase 1
known_NIR_734	chr1	162796677	162797828	+	162796677	162797802	A3SS	ENST00000254521.7	known	0.11	14	115	14	115	y	0	0	121	0	121	n	0.11	19	155	19	155	y	0.11	40	334	40	334	y	ENSG00000132196.13	HSD17B7	chr1	protein_coding	hydroxysteroid (17-beta) dehydrogenase 7
known_NIR_735	chr1	163306329	163319182	-	163306329	163308544	5pMXE	ENST00000451759.5	known	0	0	11	0	11	n	0.47	14	16	14	16	y	0.04	1	25	1	25	n	0.22	2	7	2	7	n	ENSG00000232995.7	RGS5	chr1	antisense	regulator of G-protein signaling 5
known_NIR_736	chr1	163306329	163319182	-	163306329;163308631	163308544;163319182	ES	ENST00000528019.5	known	0	0	11	0	11;11	n	0.51	14	13.5	14	16;11	y	0.05	1	19	1	25;13	n	0.29	2	5	2	7;3	y	ENSG00000232995.7	RGS5	chr1	antisense	regulator of G-protein signaling 5
known_NIR_737	chr1	163306329	163321622	-	163306329	163308544	5pMXE	ENST00000451759.5	known	0.39	7	11	7	11	y	0	0	16	0	16	n	0.24	8	25	8	25	y	0	0	7	0	7	n	ENSG00000232995.7	RGS5	chr1	antisense	regulator of G-protein signaling 5
known_NIR_738	chr1	163306329;163308631	163308544;163321622	-	163306329	163321622	cassetteExon	ENST00000618415.4	known	0.44	5.5	7	11;0	7	n	1	8	0	16;0	0	n	0.64	14.5	8	25;4	8	y	1	5.5	0	7;4	0	n	ENSG00000143248.12	RGS5	chr1	protein_coding	regulator of G-protein signaling 5
known_NIR_739	chr1	163306329;163319291	163319182;163321622	-	163306329;163308631	163308544;163321622	MXE	ENST00000449680.5	known	0.5	5.5	5.5	0;11	11;0	n	0.59	11.5	8	14;9	16;0	n	0.42	10.5	14.5	1;20	25;4	n	0.65	10	5.5	2;18	7;4	y	ENSG00000232995.7	RGS5	chr1	antisense	regulator of G-protein signaling 5
known_NIR_740	chr1	163308631;163319291	163319182;163321622	-	163308631	163321622	cassetteExon	ENST00000449680.5	known	1	11	0	11;11	0	n	1	10	0	11;9	0	n	0.8	16.5	4	13;20	4	y	0.72	10.5	4	3;18	4	y	ENSG00000232995.7	RGS5	chr1	antisense	regulator of G-protein signaling 5
known_NIR_741	chr1	163322066	163326032	+	163322212	163326032	A5SS	ENST00000524800.5	known	0.31	21	46	21	46	y	0.35	21	39	21	39	y	0.41	77	113	77	113	y	0.24	34	109	34	109	y	ENSG00000143228.12	NUF2	chr1	protein_coding	NUF2, NDC80 kinetochore complex component
known_NIR_742	chr1	1633912	1633989	+	1633912	1701148	A3SS	ENST00000618459.4	known	0.29	5	12	5	12	y	0.5	3	3	3	3	n	-	-	-	-	-	-	-	-	-	-	-	-	ENSG00000189409.12	MMP23B	chr1	protein_coding	matrix metallopeptidase 23B
known_NIR_743	chr1	16367308	16393228	+	16367308	16391375	A3SS&ES	ENST00000471507.5	known	0.58	514	374	514	374	y	0.6	334	227	334	227	y	0.58	434	315	434	315	y	0.67	437	214	437	214	y	ENSG00000055070.16	SZRD1	chr1	protein_coding	SUZ RNA binding domain containing 1
known_NIR_744	chr1	16367308	16393228	+	16367308;16391424	16391375;16393228	ES	ENST00000401088.8	known	0.58	514	372.5	514	374;371	y	0.61	334	218	334	227;209	y	0.58	434	313	434	315;311	y	0.66	437	221.5	437	214;229	y	ENSG00000055070.16	SZRD1	chr1	protein_coding	SUZ RNA binding domain containing 1
known_NIR_745	chr1	16367308	16393231	+	16367308	16391375	A3SS&ES	ENST00000401088.8	known	0.44	289	374	289	374	y	0.53	252	227	252	227	y	0.45	260	315	260	315	y	0.55	263	214	263	214	y	ENSG00000055070.16	SZRD1	chr1	protein_coding	SUZ RNA binding domain containing 1
known_NIR_746	chr1	16367308	16393231	+	16367308	16393228	A3SS	ENST00000401089.3	known	0.36	289	514	289	514	y	0.43	252	334	252	334	y	0.37	260	434	260	434	y	0.38	263	437	263	437	y	ENSG00000055070.16	SZRD1	chr1	protein_coding	SUZ RNA binding domain containing 1
known_NIR_747	chr1	16367308	16393231	+	16367308;16391424	16391375;16393231	ES	ENST00000471507.5	known	0.49	289	295.5	289	374;217	y	0.58	252	185.5	252	227;144	y	0.54	260	225.5	260	315;136	y	0.58	263	187.5	263	214;161	y	ENSG00000055070.16	SZRD1	chr1	protein_coding	SUZ RNA binding domain containing 1
known_NIR_748	chr1	16391424	16393231	+	16391424	16393228	A3SS	ENST00000401088.8	known	0.37	217	371	217	371	y	0.41	144	209	144	209	y	0.3	136	311	136	311	y	0.41	161	229	161	229	y	ENSG00000055070.16	SZRD1	chr1	protein_coding	SUZ RNA binding domain containing 1
known_NIR_749	chr1	1642001	1642347	-	1642001	1642386	A5SS	ENST00000341832.10	known	0.12	24	173	24	173	y	0.2	60	238	60	238	y	0.12	55	390	55	390	y	0.13	32	220	32	220	y	ENSG00000248333.7	CDK11B	chr1	protein_coding	cyclin-dependent kinase 11B
known_NIR_750	chr1	16440775	16443632	+	16440853	16443632	A5SS	ENST00000337132.9	known	0	0	265	0	265	n	0	0	287	0	287	n	0	0	240	0	240	n	0.02	4	182	4	182	y	ENSG00000157191.19	NECAP2	chr1	protein_coding	NECAP endocytosis associated 2
known_NIR_751	chr1	16452015	16458842	+	16452015;16455893	16455818;16458842	ES	ENST00000337132.9	known	0	0	181	0	181;181	n	0.09	17	178.5	17	191;166	y	0.12	18	136	18	153;119	y	0.07	11	151	11	142;160	y	ENSG00000157191.19	NECAP2	chr1	protein_coding	NECAP endocytosis associated 2
known_NIR_752	chr1	1645289	1649499	-	1645262	1649499	A3SS	ENST00000341832.10	known	0.23	46	153	46	153	y	0.08	13	159	13	159	y	0.16	20	104	20	104	y	0.09	20	208	20	208	y	ENSG00000248333.7	CDK11B	chr1	protein_coding	cyclin-dependent kinase 11B
known_NIR_753	chr1	164812149	164821537	+	164812149;164820184	164820072;164821537	ES	ENST00000420696.6	known	0.62	19	11.5	19	16;7	y	0.58	16	11.5	16	10;13	y	0.81	46	10.5	46	10;11	y	0.75	49	16.5	49	7;26	y	ENSG00000185630.18	PBX1	chr1	protein_coding	pre-B-cell leukemia homeobox 1
known_NIR_754	chr1	1655484;1657302	1657256;1657375	-	1655484	1657375	cassetteExon	ENST00000341832.10	known	0.14	43	255	42;44	255	y	0.17	37	185	37;37	185	y	0.1	24.5	225	28;21	225	y	0.15	40	227	44;36	227	y	ENSG00000248333.7	CDK11B	chr1	protein_coding	cyclin-dependent kinase 11B
known_NIR_755	chr1	165631293	165649841	+	165632274	165649841	5pMXE	ENST00000627653.1	known	1	649	0	649	0	n	0.86	635	100	635	100	y	1	475	0	475	0	n	1	566	0	566	0	n	ENSG00000143198.12	MGST3	chr1	protein_coding	microsomal glutathione S-transferase 3
known_NIR_756	chr1	165635822	165649841	+	165631293	165649841	A5SS	ENST00000367889.7	known	0	0	649	0	649	n	0.14	100	635	100	635	y	0	0	475	0	475	n	0.09	56	566	56	566	y	ENSG00000143198.12	MGST3	chr1	protein_coding	microsomal glutathione S-transferase 3
known_NIR_757	chr1	165635822	165649841	+	165632274	165649841	A5SS	ENST00000367885.5	known	-	-	-	-	-	-	0.5	100	100	100	100	y	-	-	-	-	-	-	1	56	0	56	0	n	ENSG00000143198.12	MGST3	chr1	protein_coding	microsomal glutathione S-transferase 3
known_NIR_758	chr1	165754990	165759525	-	165754274	165759525	A3SS	ENST00000612311.4	known	0	0	499	0	499	n	0	1	548	1	548	n	0	0	609	0	609	n	0.01	7	547	7	547	y	ENSG00000143183.16	TMCO1	chr1	protein_coding	transmembrane and coiled-coil domains 1
known_NIR_759	chr1	165768269	165768759	-	165768269	165768682	A5SS	ENST00000612311.4	known	0.17	93	468	93	468	y	0.14	120	729	120	729	y	0.11	82	665	82	665	y	0.07	49	667	49	667	y	ENSG00000143183.16	TMCO1	chr1	protein_coding	transmembrane and coiled-coil domains 1
known_NIR_760	chr1	1666019	1668327	-	1660111	1668327	A3SS	ENST00000614300.4	known	0.97	32	1	32	1	n	1	30	0	30	0	n	0.65	52	28	52	28	y	0.86	107	17	107	17	y	ENSG00000189339.11	SLC35E2B	chr1	protein_coding	solute carrier family 35, member E2B
known_NIR_761	chr1	1668472	1669664	-	1668472	1675463	A5SS	ENST00000614300.4	known	0.75	46	15	46	15	y	0.71	10	4	10	4	y	0.61	25	16	25	16	y	0.76	94	29	94	29	y	ENSG00000189339.11	SLC35E2B	chr1	protein_coding	solute carrier family 35, member E2B
known_NIR_762	chr1	1671629	1675463	-	1668472	1675463	A3SS	ENST00000614300.4	known	0.83	71	15	71	15	y	0.93	55	4	55	4	y	0.85	93	16	93	16	y	0.75	89	29	89	29	y	ENSG00000189339.11	SLC35E2B	chr1	protein_coding	solute carrier family 35, member E2B
known_NIR_763	chr1	1676846	1692449	-	1676846;1691393	1690976;1692449	ES	ENST00000614300.4	known	0.87	37	5.5	37	11;0	n	0.61	19	12	19	6;18	y	0.58	18	13	18	7;19	y	0.62	47	28.5	47	34;23	y	ENSG00000189339.11	SLC35E2B	chr1	protein_coding	solute carrier family 35, member E2B
known_NIR_764	chr1	167765749	167772275	+	167765749	167787820	A3SS	ENST00000392121.7	known	0.92	352	29	352	29	y	0.94	445	29	445	29	y	0.97	530	19	530	19	y	0.93	498	37	498	37	y	ENSG00000197965.11	MPZL1	chr1	protein_coding	myelin protein zero-like 1
known_NIR_765	chr1	167773368	167787820	+	167765749	167787820	A5SS	ENST00000392121.7	known	0.47	26	29	26	29	y	0.69	64	29	64	29	y	0.72	48	19	48	19	y	0.62	60	37	60	37	y	ENSG00000197965.11	MPZL1	chr1	protein_coding	myelin protein zero-like 1
known_NIR_766	chr1	167773368	167787820	+	167773368;167776166	167776064;167787820	ES	ENST00000359523.6	known	0.06	26	391	26	435;347	y	0.13	64	425.5	64	454;397	y	0.09	48	474.5	48	433;516	y	0.1	60	519	60	562;476	y	ENSG00000197965.11	MPZL1	chr1	protein_coding	myelin protein zero-like 1
known_NIR_767	chr1	167776166	167787820	+	167765749	167787820	A5SS	ENST00000392121.7	known	0.92	347	29	347	29	y	0.93	397	29	397	29	y	0.96	516	19	516	19	y	0.93	476	37	476	37	y	ENSG00000197965.11	MPZL1	chr1	protein_coding	myelin protein zero-like 1
known_NIR_768	chr1	168004793	168015781	+	168004793	168038371	A3SS	ENST00000312263.10	known	0	0	27	0	27	n	0	0	38	0	38	n	0	0	146	0	146	n	0.13	14	95	14	95	y	ENSG00000143164.15	DCAF6	chr1	protein_coding	DDB1 and CUL4 associated factor 6
known_NIR_769	chr1	168004793	168022988	+	168004793;168015951	168015781;168022988	ES	ENST00000432587.6	known	1	8	0	8	0;0	n	1	3	0	3	0;0	n	0.78	27	7.5	27	0;15	n	0.65	23	12.5	23	14;11	y	ENSG00000143164.15	DCAF6	chr1	protein_coding	DDB1 and CUL4 associated factor 6
known_NIR_770	chr1	168004793	168038371	+	168004793;168023047	168022988;168038371	ES	ENST00000367843.7	known	0.71	27	11	27	8;14	y	0.9	38	4	38	3;5	y	0.82	146	33	146	27;39	y	0.8	95	23.5	95	23;24	y	ENSG00000143164.15	DCAF6	chr1	protein_coding	DDB1 and CUL4 associated factor 6
known_NIR_771	chr1	168097232	168137390	-	168097232	168104477	A5SS&ES	ENST00000537209.5	known	0	0	9	0	9	n	0	0	12	0	12	n	0	0	17	0	17	n	0.33	6	12	6	12	y	ENSG00000143147.14	GPR161	chr1	protein_coding	G protein-coupled receptor 161
known_NIR_772	chr1	168104894	168114456	-	168104894	168137390	A5SS	ENST00000271357.9	known	1	9	0	9	0	n	1	6	0	6	0	n	0.64	9	5	9	5	y	1	5	0	5	0	n	ENSG00000143147.14	GPR161	chr1	protein_coding	G protein-coupled receptor 161
known_NIR_773	chr1	169324500	169367708	-	169324469	169367708	A3SS	ENST00000472647.5	known	1	78	0	78	0	n	0.96	128	6	128	6	y	0.98	128	3	128	3	y	0.93	208	15	208	15	y	ENSG00000143156.13	NME7	chr1	protein_coding	NME/NM23 family member 7
known_NIR_774	chr1	169470186	169477155	-	169470186	169485563	A5SS	ENST00000367804.4	known	1	51	0	51	0	n	1	78	0	78	0	n	1	81	0	81	0	n	0.98	111	2	111	2	y	ENSG00000117479.12	SLC19A2	chr1	protein_coding	solute carrier family 19 (thiamine transporter), member 2
known_NIR_775	chr1	169470186	169485563	-	169470186;169477757	169477155;169485563	ES	ENST00000236137.9	known	0	0	35.5	0	51;20	n	0	0	46.5	0	78;15	n	0	0	61	0	81;41	n	0.03	2	75	2	111;39	y	ENSG00000117479.12	SLC19A2	chr1	protein_coding	solute carrier family 19 (thiamine transporter), member 2
known_NIR_776	chr1	169477757	169485563	-	169470186	169485563	A3SS	ENST00000367804.4	known	1	20	0	20	0	n	1	15	0	15	0	n	1	41	0	41	0	n	0.95	39	2	39	2	y	ENSG00000117479.12	SLC19A2	chr1	protein_coding	solute carrier family 19 (thiamine transporter), member 2
known_NIR_777	chr1	16977198	16978237	-	16977195	16978237	A3SS	ENST00000375534.7	known	1	82	0	82	0	n	0.89	117	15	117	15	y	1	43	0	43	0	n	0.95	118	6	118	6	y	ENSG00000117122.13	MFAP2	chr1	protein_coding	microfibrillar-associated protein 2
known_NIR_778	chr1	16986358	16986805	-	16986358;16986632	16986463;16986805	ES	ENST00000326735.12	known	0.03	3	87.5	3	70;105	y	0.35	26	48.5	26	36;61	y	0.28	16	41	16	37;45	y	0.2	15	60.5	15	33;88	y	ENSG00000159363.17	ATP13A2	chr1	protein_coding	ATPase type 13A2
known_NIR_779	chr1	16989770	16990127	-	16989770;16990003	16989887;16990127	ES	ENST00000326735.12	known	0.1	15	129	15	108;150	y	0.12	10	73	10	39;107	y	0.14	17	101.5	17	104;99	y	0.1	13	119.5	13	114;125	y	ENSG00000159363.17	ATP13A2	chr1	protein_coding	ATPase type 13A2
known_NIR_780	chr1	16996300	16997020	-	16996300;16996496	16996386;16997020	ES	ENST00000326735.12	known	0	0	116	0	137;95	n	0	0	95	0	100;90	n	0.06	4	60.5	4	49;72	y	0.13	14	94.5	14	98;91	y	ENSG00000159363.17	ATP13A2	chr1	protein_coding	ATPase type 13A2
known_NIR_781	chr1	17004411	17004707	-	17004411	17004692	A5SS	ENST00000326735.12	known	0.71	93	38	93	38	y	0.59	68	47	68	47	y	0.7	72	31	72	31	y	0.67	77	38	77	38	y	ENSG00000159363.17	ATP13A2	chr1	protein_coding	ATPase type 13A2
known_NIR_782	chr1	170046866;170055436	170055305;170074436	-	170046866	170074436	cassetteExon	ENST00000367767.5	known	0.57	18.5	14	18;19	14	y	1	39	0	19;59	0	n	1	44.5	0	20;69	0	n	0.97	38.5	1	44;33	1	n	ENSG00000075945.12	KIFAP3	chr1	protein_coding	kinesin-associated protein 3
known_NIR_783	chr1	1701071	1701148	+	1633912	1701148	A5SS	ENST00000618459.4	known	0.29	5	12	5	12	y	0.5	3	3	3	3	n	-	-	-	-	-	-	-	-	-	-	-	-	ENSG00000189409.12	MMP23B	chr1	protein_coding	matrix metallopeptidase 23B
known_NIR_784	chr1	1703995	1704223	-	1704146	1704223	A3SS&ES	ENST00000356200.7	known	0.09	5	53	5	53	y	0.35	19	35	19	35	y	0.31	21	47	21	47	y	0.05	3	59	3	59	y	ENSG00000008128.22	CDK11A	chr1	protein_coding	cyclin-dependent kinase 11A
known_NIR_785	chr1	1705732	1707525	-	1705732	1707409	A5SS	ENST00000356200.7	known	0.26	37	108	37	108	y	0	0	112	0	112	n	0.22	35	125	35	125	y	0.11	15	116	15	116	y	ENSG00000008128.22	CDK11A	chr1	protein_coding	cyclin-dependent kinase 11A
known_NIR_786	chr1	1709133	1709479	-	1709133	1709518	A5SS	ENST00000356200.7	known	0.09	28	271	28	271	y	0.16	60	321	60	321	y	0.11	57	441	57	441	y	0.14	43	268	43	268	y	ENSG00000008128.22	CDK11A	chr1	protein_coding	cyclin-dependent kinase 11A
known_NIR_787	chr1	1712427	1716346	-	1712400	1716346	A3SS	ENST00000356200.7	known	0.2	14	56	14	56	y	0.08	8	97	8	97	y	0.06	5	77	5	77	y	0.12	11	80	11	80	y	ENSG00000008128.22	CDK11A	chr1	protein_coding	cyclin-dependent kinase 11A
known_NIR_788	chr1	171512200	171513001	+	171512200	171512995	A3SS	ENST00000392078.7	known	0.27	27	73	27	73	y	0.06	4	59	4	59	y	0.17	17	83	17	83	y	0.17	20	100	20	100	y	ENSG00000117523.15	PRRC2C	chr1	protein_coding	proline-rich coiled-coil 2C
known_NIR_789	chr1	171514645	171515734	+	171514630	171515734	A5SS	ENST00000392078.7	known	0.84	64	12	64	12	y	1	57	0	57	0	n	0.98	88	2	88	2	y	0.88	67	9	67	9	y	ENSG00000117523.15	PRRC2C	chr1	protein_coding	proline-rich coiled-coil 2C
known_NIR_790	chr1	1716478	1719358	-	1716478	1719328	A5SS	ENST00000356200.7	known	0.46	21	25	21	25	y	0.74	29	10	29	10	y	0.73	40	15	40	15	y	0.46	33	38	33	38	y	ENSG00000008128.22	CDK11A	chr1	protein_coding	cyclin-dependent kinase 11A
known_NIR_791	chr1	171782120	171783740	+	171781795	171783740	A5SS	ENST00000362019.7	known	0.81	117	27	117	27	y	0.89	163	21	163	21	y	0.91	116	12	116	12	y	0.92	130	12	130	12	y	ENSG00000010165.19	METTL13	chr1	protein_coding	methyltransferase like 13
known_NIR_792	chr1	1721711	1722708	-	1721711	1722588	A5SS	ENST00000356200.7	known	0.95	162	8	162	8	y	0.67	41	20	41	20	y	0.83	71	15	71	15	y	0.78	129	36	129	36	y	ENSG00000008128.22	CDK11A	chr1	protein_coding	cyclin-dependent kinase 11A
known_NIR_793	chr1	1721711;1722634	1722588;1722708	-	1721711	1722708	cassetteExon	ENST00000317673.8	known	0.05	9	162	8;10	162	y	0.3	17.5	41	20;15	41	y	0.15	13	71	15;11	71	y	0.15	23.5	129	36;11	129	y	ENSG00000248333.7	CDK11B	chr1	protein_coding	cyclin-dependent kinase 11B
known_NIR_794	chr1	172551626;172553370	172553260;172555869	+	172551626	172555869	cassetteExon	ENST00000367723.8	known	1	1	0	2;0	0	n	1	3.5	0	1;6	0	n	1	7	0	10;4	0	n	0.75	9	3	10;8	3	y	ENSG00000094975.13	SUCO	chr1	protein_coding	SUN domain containing ossification factor
known_NIR_795	chr1	1734835	1738321	-	1734835	1735204	5pMXE	ENST00000598846.1	known	1	9	0	9	0	n	0.9	9	1	9	1	n	0.58	11	8	11	8	y	0	0	13	0	13	n	ENSG00000268575.1	RP1-283E3.8	chr1	processed_transcript		--
known_NIR_796	chr1	173803505	173807267	-	173803505;173806576	173806439;173807267	ES	ENST00000356198.6	known	0.43	6	8	6	0;16	n	0.3	9	21.5	9	29;14	y	0.65	32	17	32	17;17	y	0.69	19	8.5	19	0;17	n	ENSG00000120334.15	CENPL	chr1	protein_coding	centromere protein L
known_NIR_797	chr1	173864304	173864675	-	173864304;173864506	173864484;173864675	ES	ENST00000449289.5	known	0.11	185	1445	185	1436;1454	y	0.12	288	2074	288	2076;2072	y	0.06	103	1575	103	1594;1556	y	0.08	137	1558	137	1592;1524	y	ENSG00000234741.7	GAS5	chr1	processed_transcript	growth arrest-specific 5 (non-protein coding)
known_NIR_798	chr1	173864704	173865510	-	173864704	173865229	A5SS&ES	ENST00000452197.5	known	0.04	79	1821	79	1821	y	0.02	58	2589	58	2589	y	0.04	74	1886	74	1886	y	0.02	31	1798	31	1798	y	ENSG00000234741.7	GAS5	chr1	processed_transcript	growth arrest-specific 5 (non-protein coding)
known_NIR_799	chr1	173864704;173865282	173865229;173865510	-	173864704	173865510	cassetteExon	ENST00000449289.5	known	0.95	1394.5	79	1821;968	79	y	0.97	1999	58	2589;1409	58	y	0.95	1564.5	74	1886;1243	74	y	0.98	1410.5	31	1798;1023	31	y	ENSG00000234741.7	GAS5	chr1	processed_transcript	growth arrest-specific 5 (non-protein coding)
known_NIR_800	chr1	173864704;173865282	173865229;173866528	-	173864704;173866206	173865510;173866528	MXE	ENST00000449289.5	known	0.37	916.5	1593	1821;12	79;3107	y	0.41	1302.5	1855	2589;16	58;3652	y	0.37	943	1637	1886;0	74;3200	n	0.38	899	1460	1798;0	31;2889	n	ENSG00000234741.7	GAS5	chr1	processed_transcript	growth arrest-specific 5 (non-protein coding)
known_NIR_801	chr1	173865282	173865471	-	173865282	173865510	A5SS	ENST00000414075.5	known	0.56	1232	968	1232	968	y	0.54	1678	1409	1678	1409	y	0.52	1371	1243	1371	1243	y	0.57	1330	1023	1330	1023	y	ENSG00000234741.7	GAS5	chr1	processed_transcript	growth arrest-specific 5 (non-protein coding)
known_NIR_802	chr1	173865282	173865471	-	173865282	173866528	A5SS	ENST00000452197.5	known	0.99	1232	12	1232	12	y	0.99	1678	16	1678	16	y	1	1371	0	1371	0	n	1	1330	0	1330	0	n	ENSG00000234741.7	GAS5	chr1	processed_transcript	growth arrest-specific 5 (non-protein coding)
known_NIR_803	chr1	173865282	173865510	-	173865282	173866528	A5SS	ENST00000452197.5	known	0.99	968	12	968	12	y	0.99	1409	16	1409	16	y	1	1243	0	1243	0	n	1	1023	0	1023	0	n	ENSG00000234741.7	GAS5	chr1	processed_transcript	growth arrest-specific 5 (non-protein coding)
known_NIR_804	chr1	173865952	173866177	-	173865894	173866177	A3SS	ENST00000449289.5	known	0	0	2356	0	2356	n	0	7	3028	7	3028	y	0	0	2588	0	2588	n	0	2	2333	2	2333	y	ENSG00000234741.7	GAS5	chr1	processed_transcript	growth arrest-specific 5 (non-protein coding)
known_NIR_805	chr1	173866206	173866528	-	173865282	173866528	A3SS	ENST00000452197.5	known	1	3107	12	3107	12	y	1	3652	16	3652	16	y	1	3200	0	3200	0	n	1	2889	0	2889	0	n	ENSG00000234741.7	GAS5	chr1	processed_transcript	growth arrest-specific 5 (non-protein coding)
known_NIR_806	chr1	173867043	173867155	-	173867043	173867960	A5SS	ENST00000449289.5	known	0.01	7	852	7	852	y	0	0	886	0	886	n	0	0	797	0	797	n	0.02	18	806	18	806	y	ENSG00000234741.7	GAS5	chr1	processed_transcript	growth arrest-specific 5 (non-protein coding)
known_NIR_807	chr1	173867043	173867981	-	173867043	173867960	A5SS	ENST00000449289.5	known	0	0	852	0	852	n	0.07	69	886	69	886	y	0.05	44	797	44	797	y	0	0	806	0	806	n	ENSG00000234741.7	GAS5	chr1	processed_transcript	growth arrest-specific 5 (non-protein coding)
known_NIR_808	chr1	1739704	1745724	-	1739704;1744668	1744251;1745724	ES	ENST00000355439.6	known	0	0	2.5	0	5;0	n	0	0	11	0	18;4	n	0.31	7	15.5	7	23;8	y	0.34	11	21	11	17;25	y	ENSG00000215790.6	SLC35E2	chr1	protein_coding	solute carrier family 35, member E2
known_NIR_809	chr1	175000195	175004614	+	174999689	175004614	A5SS	ENST00000613570.4	known	0.98	1098	21	1098	21	y	0.98	1341	34	1341	34	y	0.97	1501	43	1501	43	y	0.97	1226	42	1226	42	y	ENSG00000116161.17	CACYBP	chr1	protein_coding	calcyclin binding protein
known_NIR_810	chr1	175000599	175004614	+	174999689	175004614	A5SS	ENST00000613570.4	known	0.34	11	21	11	21	y	0.53	39	34	39	34	y	0.16	8	43	8	43	y	0.32	20	42	20	42	y	ENSG00000116161.17	CACYBP	chr1	protein_coding	calcyclin binding protein
known_NIR_811	chr1	175000599	175004614	+	175000195	175004614	A5SS	ENST00000367679.6	known	0.01	11	1098	11	1098	y	0.03	39	1341	39	1341	y	0.01	8	1501	8	1501	y	0.02	20	1226	20	1226	y	ENSG00000116161.17	CACYBP	chr1	protein_coding	calcyclin binding protein
known_NIR_812	chr1	175004814	175006745	+	175004833	175006745	A5SS	ENST00000613570.4	known	0.03	21	584	21	584	y	0	0	765	0	765	n	0	0	802	0	802	n	0	0	767	0	767	n	ENSG00000116161.17	CACYBP	chr1	protein_coding	calcyclin binding protein
known_NIR_813	chr1	175166737	175192640	-	175166737	175177611	A5SS&ES	ENST00000444639.5	known	0.14	12	76	12	76	y	0.38	38	61	38	61	y	0.38	45	73	45	73	y	0.28	37	94	37	94	y	ENSG00000235750.9	KIAA0040	chr1	protein_coding	KIAA0040
known_NIR_814	chr1	175166737	175192640	-	175166737;175177684	175177611;175192640	ES	ENST00000423313.5	known	0.12	12	88.5	12	76;101	y	0.39	38	59	38	61;57	y	0.4	45	67.5	45	73;62	y	0.28	37	94.5	37	94;95	y	ENSG00000235750.9	KIAA0040	chr1	protein_coding	KIAA0040
known_NIR_815	chr1	175177684	175192860	-	175177684	175192640	5pMXE	ENST00000423313.5	known	0	0	101	0	101	n	0	0	57	0	57	n	0	0	62	0	62	n	0.02	2	95	2	95	y	ENSG00000235750.9	KIAA0040	chr1	protein_coding	KIAA0040
known_NIR_816	chr1	176135086	176149006	-	176135086;176136547	176136488;176149006	ES	ENST00000367669.7	known	0.29	19	47	19	44;50	y	0.49	32	33	32	36;30	y	0.74	54	19	54	8;30	y	0.57	27	20	27	26;14	y	ENSG00000143207.19	RFWD2	chr1	protein_coding	ring finger and WD repeat domain 2, E3 ubiquitin protein ligase
known_NIR_817	chr1	176162988	176163827	-	176162988	176163815	A5SS	ENST00000367669.7	known	0.07	4	50	4	50	y	0.19	15	64	15	64	y	0.04	3	65	3	65	y	0.13	16	110	16	110	y	ENSG00000143207.19	RFWD2	chr1	protein_coding	ring finger and WD repeat domain 2, E3 ubiquitin protein ligase
known_NIR_818	chr1	17632466	17634835	+	17632466;17634562	17634548;17634835	ES	ENST00000361221.7	known	0.58	30	22	30	22;22	y	0.64	30	17	30	17;17	y	0.27	22	60	22	58;62	y	0.41	25	35.5	25	34;37	y	ENSG00000074964.16	ARHGEF10L	chr1	protein_coding	Rho guanine nucleotide exchange factor (GEF) 10-like
known_NIR_819	chr1	1765446	1778746	-	1765446	1778289	5pMXE	ENST00000341426.9	known	0	0	81	0	81	n	0.03	3	91	3	91	y	0	0	106	0	106	n	0	0	81	0	81	n	ENSG00000008130.15	NADK	chr1	protein_coding	NAD kinase
known_NIR_820	chr1	178454648	178456700	+	178454648	178456721	A3SS	ENST00000367649.7	known	0.47	18	20	18	20	y	0.29	6	15	6	15	y	0.88	56	8	56	8	y	0.67	33	16	33	16	y	ENSG00000075391.16	RASAL2	chr1	protein_coding	RAS protein activator like 2
known_NIR_821	chr1	178889696;178892307	178892230;178893919	+	178889696	178893919	cassetteExon	ENST00000367634.6	known	0	0	13	0;0	13	n	0.37	7	12	5;9	12	y	0.05	2.5	49	5;0	49	n	0	0	50	0;0	50	n	ENSG00000116191.17	RALGPS2	chr1	protein_coding	Ral GEF with PH domain and SH3 binding motif 2
known_NIR_822	chr1	179131481	179142933	-	179131481	179133312	A5SS&ES	ENST00000502732.5	known	0.63	26	15	26	15	y	0.65	73	40	73	40	y	0.87	53	8	53	8	y	0.69	88	40	88	40	y	ENSG00000143322.19	ABL2	chr1	protein_coding	ABL proto-oncogene 2, non-receptor tyrosine kinase
known_NIR_823	chr1	179131481	179142933	-	179131481;179133374	179133312;179142933	ES	ENST00000344730.7	known	0.65	26	14	26	15;13	y	0.71	73	30.5	73	40;21	y	0.93	53	4	53	8;0	n	0.69	88	39.5	88	40;39	y	ENSG00000143322.19	ABL2	chr1	protein_coding	ABL proto-oncogene 2, non-receptor tyrosine kinase
known_NIR_824	chr1	179131481	179229241	-	179131481	179142933	5pMXE	ENST00000504405.5	known	0.19	6	26	6	26	y	0.11	9	73	9	73	y	0.04	2	53	2	53	y	0.09	9	88	9	88	y	ENSG00000143322.19	ABL2	chr1	protein_coding	ABL proto-oncogene 2, non-receptor tyrosine kinase
known_NIR_825	chr1	179131481	179229241	-	179131481;179133374	179133312;179229241	ES	ENST00000502732.5	known	0.44	6	7.5	6	15;0	n	0.26	9	26	9	40;12	y	0.33	2	4	2	8;0	n	0.26	9	25.5	9	40;11	y	ENSG00000143322.19	ABL2	chr1	protein_coding	ABL proto-oncogene 2, non-receptor tyrosine kinase
known_NIR_826	chr1	179133374	179142933	-	179133374	179229241	A5SS	ENST00000502732.5	known	1	13	0	13	0	n	0.64	21	12	21	12	y	-	-	-	-	-	-	0.78	39	11	39	11	y	ENSG00000143322.19	ABL2	chr1	protein_coding	ABL proto-oncogene 2, non-receptor tyrosine kinase
known_NIR_827	chr1	179302802;179323495	179323437;179335506	+	179302802	179335506	cassetteExon	ENST00000540564.5	known	0.77	30	9	42;18	9	y	0.96	96.5	4	102;91	4	y	0.95	102.5	5	91;114	5	y	0.93	114.5	9	126;103	9	y	ENSG00000057252.12	SOAT1	chr1	protein_coding	sterol O-acyltransferase 1
known_NIR_828	chr1	179852811	179877239	-	179865854	179877239	3pMXE	ENST00000482587.5	known	0	0	74	0	74	n	0.19	22	91	22	91	y	0.05	12	221	12	221	y	0.08	14	171	14	171	y	ENSG00000169905.12	TOR1AIP2	chr1	protein_coding	torsin A interacting protein 2
known_NIR_829	chr1	179852811;179865854	179865436;179877239	-	179852811	179877239	cassetteExon	ENST00000367612.7	known	1	39	0	4;74	0	n	0.7	50.5	22	10;91	22	y	0.9	114	12	7;221	12	y	0.86	86.5	14	2;171	14	y	ENSG00000169905.12	TOR1AIP2	chr1	protein_coding	torsin A interacting protein 2
known_NIR_830	chr1	179884769	179889313	+	179884769	179889310	A3SS	ENST00000528443.6	known	0.54	29	25	29	25	y	0.91	73	7	73	7	y	0.6	96	64	96	64	y	0.67	103	50	103	50	y	ENSG00000143337.18	TOR1AIP1	chr1	protein_coding	torsin A interacting protein 1
known_NIR_831	chr1	1806538	1815756	-	1806538	1825397	A5SS	ENST00000615252.4	known	0.97	1059	28	1059	28	y	1	1001	0	1001	0	n	1	1199	0	1199	0	n	1	1301	1	1301	1	n	ENSG00000078369.17	GNB1	chr1	protein_coding	guanine nucleotide binding protein (G protein), beta polypeptide 1
known_NIR_832	chr1	180993425	181002606	-	180993425	181022639	A5SS	ENST00000542060.5	known	1	172	0	172	0	n	0.99	164	2	164	2	y	1	125	0	125	0	n	0.96	183	8	183	8	y	ENSG00000135823.13	STX6	chr1	protein_coding	syntaxin 6
known_NIR_833	chr1	181005463	181022639	-	180993425	181022639	A3SS	ENST00000542060.5	known	1	49	0	49	0	n	0.98	121	2	121	2	y	1	167	0	167	0	n	0.97	223	8	223	8	y	ENSG00000135823.13	STX6	chr1	protein_coding	syntaxin 6
known_NIR_834	chr1	181050286	181052235	+	181050286	181055225	A3SS	ENST00000434571.6	known	1	35	0	35	0	n	1	19	0	19	0	n	1	55	0	55	0	n	0.85	29	5	29	5	y	ENSG00000153029.14	MR1	chr1	protein_coding	major histocompatibility complex, class I-related
known_NIR_835	chr1	181050286	181055225	+	181050286;181053677	181053573;181055225	ES	ENST00000617803.4	known	0	0	12.5	0	0;25	n	0	0	27	0	11;43	n	0	0	75.5	0	50;101	n	0.08	5	58.5	5	35;82	y	ENSG00000153029.14	MR1	chr1	protein_coding	major histocompatibility complex, class I-related
known_NIR_836	chr1	181050286;181052510	181052235;181053573	+	181050286	181053573	cassetteExon	ENST00000617803.4	known	1	32.5	0	35;30	0	n	0.65	20	11	19;21	11	y	0.43	37	50	55;19	50	y	0.41	24	35	29;19	35	y	ENSG00000153029.14	MR1	chr1	protein_coding	major histocompatibility complex, class I-related
known_NIR_837	chr1	1817875	1825397	-	1806538	1825397	A3SS	ENST00000615252.4	known	0.97	906	28	906	28	y	1	1090	0	1090	0	n	1	1223	0	1223	0	n	1	1130	1	1130	1	n	ENSG00000078369.17	GNB1	chr1	protein_coding	guanine nucleotide binding protein (G protein), beta polypeptide 1
known_NIR_838	chr1	182388750	182390497	-	182388750	182391175	A5SS	ENST00000417584.6	known	0	0	76	0	76	n	0	0	133	0	133	n	0	0	74	0	74	n	0.03	3	83	3	83	y	ENSG00000135821.16	GLUL	chr1	protein_coding	glutamate-ammonia ligase
known_NIR_839	chr1	182388750	182391175	-	182388750	182391679	A5SS	ENST00000331872.10	known	0.35	76	140	76	140	y	0.57	133	101	133	101	y	0.29	74	181	74	181	y	0.27	83	226	83	226	y	ENSG00000135821.16	GLUL	chr1	protein_coding	glutamate-ammonia ligase
known_NIR_840	chr1	182388750	182391679	-	182388750	182390497	A5SS	ENST00000339526.8	known	1	140	0	140	0	n	1	101	0	101	0	n	1	181	0	181	0	n	0.99	226	3	226	3	y	ENSG00000135821.16	GLUL	chr1	protein_coding	glutamate-ammonia ligase
known_NIR_841	chr1	1825499;1839238	1839190;1890820	-	1825499	1890820	cassetteExon	ENST00000610897.4	known	0.75	439	143	482;396	143	y	0.66	498.5	254	574;423	254	y	0.79	523.5	141	569;478	141	y	0.68	522.5	242	591;454	242	y	ENSG00000078369.17	GNB1	chr1	protein_coding	guanine nucleotide binding protein (G protein), beta polypeptide 1
known_NIR_842	chr1	183472649	183502253	+	183472649	183515874	A3SS	ENST00000508461.5	known	0	0	11	0	11	n	0.06	2	29	2	29	y	0.45	5	6	5	6	y	0.08	3	36	3	36	y	ENSG00000116698.20	SMG7	chr1	protein_coding	SMG7 nonsense mediated mRNA decay factor
known_NIR_843	chr1	183472649	183512837	+	183472649;183502391	183502253;183512837	ES	ENST00000367537.7	known	0.93	56	4	56	0;8	n	0.63	16	9.5	16	2;17	y	0.89	81	10.5	81	5;16	y	0.82	81	17.5	81	3;32	y	ENSG00000116698.20	SMG7	chr1	protein_coding	SMG7 nonsense mediated mRNA decay factor
known_NIR_844	chr1	183472649;183512868	183512837;183515874	+	183472649	183515874	cassetteExon	ENST00000508461.5	known	0.86	66.5	11	56;77	11	y	0.51	30.5	29	16;45	29	y	0.93	78.5	6	81;76	6	y	0.71	86.5	36	81;92	36	y	ENSG00000116698.20	SMG7	chr1	protein_coding	SMG7 nonsense mediated mRNA decay factor
known_NIR_845	chr1	183542502	183544353	+	183542364	183544353	A5SS	ENST00000367537.7	known	0.24	34	106	34	106	y	0.15	18	104	18	104	y	0.25	39	115	39	115	y	0.45	132	161	132	161	y	ENSG00000116698.20	SMG7	chr1	protein_coding	SMG7 nonsense mediated mRNA decay factor
known_NIR_846	chr1	183546337	183549208	+	183546337;183547252	183547103;183549208	ES	ENST00000367537.7	known	0.72	58	23	58	20;26	y	0.88	56	7.5	56	6;9	y	0.98	153	3	153	6;0	n	0.94	91	5.5	91	6;5	y	ENSG00000116698.20	SMG7	chr1	protein_coding	SMG7 nonsense mediated mRNA decay factor
known_NIR_847	chr1	183633163	183635517	-	183633154	183635517	A3SS	ENST00000359856.10	known	0.01	5	757	5	757	y	0	1	869	1	869	n	0	2	1000	2	1000	y	0	0	786	0	786	n	ENSG00000162704.15	ARPC5	chr1	protein_coding	actin related protein 2/3 complex, subunit 5, 16kDa
known_NIR_848	chr1	184054863	184072827	+	184054863;184072194	184072157;184072827	ES	ENST00000533373.5	known	0.46	33	39	33	78;0	n	0.16	8	42.5	8	72;13	y	0.1	5	46.5	5	93;0	n	0.14	7	41.5	7	78;5	y	ENSG00000198860.11	TSEN15	chr1	protein_coding	TSEN15 tRNA splicing endonuclease subunit
known_NIR_849	chr1	184054863	184072827	+	184054863;184072298	184072157;184072827	ES	ENST00000361641.5	known	0.31	33	72.5	33	78;67	y	0.11	8	65.5	8	72;59	y	0.05	5	105.5	5	93;118	y	0.1	7	62.5	7	78;47	y	ENSG00000198860.11	TSEN15	chr1	protein_coding	TSEN15 tRNA splicing endonuclease subunit
known_NIR_850	chr1	184072194	184072827	+	184072298	184072827	A5SS	ENST00000361641.5	known	0	0	67	0	67	n	0.18	13	59	13	59	y	0	0	118	0	118	n	0.1	5	47	5	47	y	ENSG00000198860.11	TSEN15	chr1	protein_coding	TSEN15 tRNA splicing endonuclease subunit
known_NIR_851	chr1	185091739	185098072	+	185091739;185093276	185093061;185098072	ES	ENST00000367510.7	known	0.06	4	61	4	43;79	y	0	0	26	0	31;21	n	0.03	3	86.5	3	86;87	y	0.18	13	59.5	13	47;72	y	ENSG00000121481.10	RNF2	chr1	protein_coding	ring finger protein 2
known_NIR_852	chr1	186391791;186394015	186393947;186398313	+	186391791	186398313	cassetteExon	ENST00000367470.7	known	1	29.5	0	33;26	0	n	1	60.5	0	56;65	0	n	1	54	0	50;58	0	n	0.9	47	5	46;48	5	y	ENSG00000157181.14	C1orf27	chr1	protein_coding	chromosome 1 open reading frame 27
known_NIR_853	chr1	18875503	18877208	-	18875503;18876467	18876315;18877208	ES	ENST00000494072.3	known	0.19	6	25	6	33;17	y	0	0	7.5	0	15;0	n	0	0	3	0	6;0	n	0.64	8	4.5	8	7;2	y	ENSG00000255275.3	RP13-279N23.2	chr1	protein_coding		--
known_NIR_854	chr1	19238854	19239231	-	19238857	19239231	A3SS	ENST00000477853.5	known	0.17	33	159	33	159	y	0.11	15	127	15	127	y	0.16	32	162	32	162	y	0.07	9	114	9	114	y	ENSG00000127463.13	EMC1	chr1	protein_coding	ER membrane protein complex subunit 1
known_NIR_855	chr1	19243707	19244906	-	19243707;19244015	19243950;19244906	ES	ENST00000477853.5	known	0.12	35	256	35	225;287	y	0	0	158.5	0	134;183	n	0.1	24	227	24	227;227	y	0.07	22	295	22	246;344	y	ENSG00000127463.13	EMC1	chr1	protein_coding	ER membrane protein complex subunit 1
known_NIR_856	chr1	193018820	193021097	-	193016395	193021097	A3SS	ENST00000367455.8	known	0.31	48	107	48	107	y	0.13	28	195	28	195	y	0.05	15	275	15	275	y	0.22	56	198	56	198	y	ENSG00000116750.13	UCHL5	chr1	protein_coding	ubiquitin carboxyl-terminal hydrolase L5
known_NIR_857	chr1	193018820	193021097	-	193018820;193020381	193020307;193021097	ES	ENST00000367448.5	known	0.6	48	31.5	48	22;41	y	0.71	28	11.5	28	5;18	y	0.27	15	40	15	16;64	y	0.67	56	27.5	56	7;48	y	ENSG00000116750.13	UCHL5	chr1	protein_coding	ubiquitin carboxyl-terminal hydrolase L5
known_NIR_858	chr1	193020381	193021097	-	193016395	193021097	A3SS	ENST00000367455.8	known	0.28	41	107	41	107	y	0.08	18	195	18	195	y	0.19	64	275	64	275	y	0.2	48	198	48	198	y	ENSG00000116750.13	UCHL5	chr1	protein_coding	ubiquitin carboxyl-terminal hydrolase L5
known_NIR_859	chr1	193023036	193023844	-	193023039	193023844	A3SS	ENST00000367455.8	known	0.63	106	63	106	63	y	0.51	165	157	165	157	y	0.55	176	143	176	143	y	0.54	234	198	234	198	y	ENSG00000116750.13	UCHL5	chr1	protein_coding	ubiquitin carboxyl-terminal hydrolase L5
known_NIR_860	chr1	193023946;193027955	193027875;193028085	-	193023946	193028085	cassetteExon	ENST00000367455.8	known	0.23	43.5	147	43;44	147	y	0.26	58.5	169	30;87	169	y	0.18	50	226	37;63	226	y	0.15	58	328	66;50	328	y	ENSG00000116750.13	UCHL5	chr1	protein_coding	ubiquitin carboxyl-terminal hydrolase L5
known_NIR_861	chr1	193059776	193069034	+	193059776	193075820	A3SS	ENST00000432079.5	known	1	8	0	8	0	n	0.54	7	6	7	6	y	0.37	30	52	30	52	y	0.4	14	21	14	21	y	ENSG00000116747.12	TROVE2	chr1	protein_coding	TROVE domain family, member 2
known_NIR_862	chr1	193059776	193075820	+	193059776;193069634	193069034;193075820	ES	ENST00000400968.6	known	0	0	27.5	0	8;47	n	0.27	6	16.5	6	7;26	y	0.69	52	23.5	52	30;17	y	0.49	21	21.5	21	14;29	y	ENSG00000116747.12	TROVE2	chr1	protein_coding	TROVE domain family, member 2
known_NIR_863	chr1	193060222	193069034	+	193059776	193069034	A5SS	ENST00000400968.6	known	0	0	8	0	8	n	0.73	19	7	19	7	y	0.12	4	30	4	30	y	0.07	1	14	1	14	n	ENSG00000116747.12	TROVE2	chr1	protein_coding	TROVE domain family, member 2
known_NIR_864	chr1	193069634	193075820	+	193059776	193075820	A5SS	ENST00000432079.5	known	1	47	0	47	0	n	0.81	26	6	26	6	y	0.25	17	52	17	52	y	0.58	29	21	29	21	y	ENSG00000116747.12	TROVE2	chr1	protein_coding	TROVE domain family, member 2
known_NIR_865	chr1	193101204	193105517	-	193101204	193105264	5pMXE	ENST00000367439.7	known	0	0	68	0	68	n	0.04	7	160	7	160	y	0.01	1	109	1	109	n	0	0	93	0	93	n	ENSG00000023572.8	GLRX2	chr1	protein_coding	glutaredoxin 2
known_NIR_866	chr1	19312889	19324633	+	19312889;19317841	19317600;19324633	ES	ENST00000375155.7	known	0.11	12	101.5	12	103;100	y	0	0	105	0	133;77	n	0.03	2	73	2	64;82	y	0.13	15	99	15	117;81	y	ENSG00000040487.12	PQLC2	chr1	protein_coding	PQ loop repeat containing 2
known_NIR_867	chr1	19339617	19342752	-	19339617	19345187	A5SS	ENST00000264203.7	known	1	8	0	8	0	n	0.57	12	9	12	9	y	0	0	15	0	15	n	0	0	17	0	17	n	ENSG00000077549.17	CAPZB	chr1	protein_coding	capping protein (actin filament) muscle Z-line, beta
known_NIR_868	chr1	19339617;19342864	19342752;19344358	-	19339617	19344358	cassetteExon	ENST00000375144.5	known	0.01	7	1052	8;6	1052	y	0.01	14	1034	12;16	1034	y	0	0	1326	0;0	1326	n	0	2	1186	0;4	1186	n	ENSG00000077549.17	CAPZB	chr1	protein_coding	capping protein (actin filament) muscle Z-line, beta
known_NIR_869	chr1	19339617;19344434	19344358;19345187	-	19339617	19345187	cassetteExon	ENST00000264203.7	known	1	997.5	0	1052;943	0	n	0.99	1127	9	1034;1220	9	y	0.99	1252.5	15	1326;1179	15	y	0.99	1214	17	1186;1242	17	y	ENSG00000077549.17	CAPZB	chr1	protein_coding	capping protein (actin filament) muscle Z-line, beta
known_NIR_870	chr1	19419750	19484190	-	19419750	19485436	A5SS	ENST00000375142.5	known	0.02	23	980	23	980	y	0.02	15	943	15	943	y	0.03	31	1058	31	1058	y	0	0	1156	0	1156	n	ENSG00000077549.17	CAPZB	chr1	protein_coding	capping protein (actin filament) muscle Z-line, beta
known_NIR_871	chr1	19597109;19622147	19622100;19623474	+	19597109	19623474	cassetteExon	ENST00000617872.4	known	0.96	779	30	619;939	30	y	0.93	843.5	60	678;1009	60	y	0.88	868.5	118	742;995	118	y	0.93	951.5	68	810;1093	68	y	ENSG00000173436.13	MINOS1	chr1	protein_coding	mitochondrial inner membrane organizing system 1
known_NIR_872	chr1	19643625	19655012	+	19643397	19655012	A5SS	ENST00000289749.6	known	1	20	0	20	0	n	0.8	12	3	12	3	y	0	0	11	0	11	n	-	-	-	-	-	-	ENSG00000158747.13	NBL1	chr1	protein_coding	neuroblastoma 1, DAN family BMP antagonist
known_NIR_873	chr1	19644446	19655012	+	19643397	19655012	A5SS	ENST00000289749.6	known	1	255	0	255	0	n	0.99	214	3	214	3	y	0.94	171	11	171	11	y	1	233	0	233	0	n	ENSG00000158747.13	NBL1	chr1	protein_coding	neuroblastoma 1, DAN family BMP antagonist
known_NIR_874	chr1	19644446	19655012	+	19643625	19655012	A5SS	ENST00000622566.4	known	0.93	255	20	255	20	y	0.95	214	12	214	12	y	1	171	0	171	0	n	1	233	0	233	0	n	ENSG00000158747.13	NBL1	chr1	protein_coding	neuroblastoma 1, DAN family BMP antagonist
known_NIR_875	chr1	197096164	197100431	-	197096164	197117789	A5SS	ENST00000294732.11	known	1	19	0	19	0	n	0.54	21	18	21	18	y	1	30	0	30	0	n	0.8	12	3	12	3	y	ENSG00000066279.16	ASPM	chr1	protein_coding	asp (abnormal spindle) homolog, microcephaly associated (Drosophila)
known_NIR_876	chr1	197096164	197117789	-	197096164;197105185	197100431;197117789	ES	ENST00000367409.8	known	0	0	11.5	0	19;4	n	0.5	18	18	18	21;15	y	0	0	22.5	0	30;15	n	0.23	3	10	3	12;8	y	ENSG00000066279.16	ASPM	chr1	protein_coding	asp (abnormal spindle) homolog, microcephaly associated (Drosophila)
known_NIR_877	chr1	197105185	197117789	-	197096164	197117789	A3SS	ENST00000294732.11	known	1	4	0	4	0	n	0.45	15	18	15	18	y	1	15	0	15	0	n	0.73	8	3	8	3	y	ENSG00000066279.16	ASPM	chr1	protein_coding	asp (abnormal spindle) homolog, microcephaly associated (Drosophila)
known_NIR_878	chr1	19787117	19799174	-	19787117	19798137	A5SS&ES	ENST00000294543.10	known	1	6	0	6	0	n	0	0	39	0	39	n	0	0	17	0	17	n	0.38	5	8	5	8	y	ENSG00000162542.13	TMCO4	chr1	protein_coding	transmembrane and coiled-coil domains 4
known_NIR_879	chr1	200409723	200409946	-	200409719	200409946	A3SS	ENST00000294740.3	known	0	0	1	0	1	n	0.36	5	9	5	9	y	0.9	9	1	9	1	n	0.5	4	4	4	4	n	ENSG00000162702.7	ZNF281	chr1	protein_coding	zinc finger protein 281
known_NIR_880	chr1	200844869	200847258	+	200844869	200847210	A3SS	ENST00000358823.6	known	0	0	12	0	12	n	0.26	6	17	6	17	y	0.17	8	39	8	39	y	0.14	4	25	4	25	y	ENSG00000118200.14	CAMSAP2	chr1	protein_coding	calmodulin regulated spectrin-associated protein family, member 2
known_NIR_881	chr1	200895087	200898307	+	200891701	200898307	A5SS	ENST00000367342.8	known	0.28	57	144	57	144	y	0.38	74	123	74	123	y	0.25	24	73	24	73	y	0.23	29	95	29	95	y	ENSG00000163362.10	C1orf106	chr1	protein_coding	chromosome 1 open reading frame 106
known_NIR_882	chr1	200981096;200983094	200983056;200984859	-	200981096	200984859	cassetteExon	ENST00000332129.6	known	0.87	13	2	8;18	2	y	1	12	0	11;13	0	n	0	0	4	0;0	4	n	0.8	35.5	9	30;41	9	y	ENSG00000116852.14	KIF21B	chr1	protein_coding	kinesin family member 21B
known_NIR_883	chr1	201151852	201153849	-	201151852	201153858	A5SS	ENST00000367334.9	known	0.06	18	267	18	267	y	0.01	4	323	4	323	y	0.01	2	315	2	315	y	0.04	17	390	17	390	y	ENSG00000116857.16	TMEM9	chr1	protein_coding	transmembrane protein 9
known_NIR_884	chr1	201153959	201154148	-	201153959	201154445	A5SS	ENST00000367334.9	known	0.25	22	66	22	66	y	0.22	25	91	25	91	y	0.26	29	82	29	82	y	0.28	42	108	42	108	y	ENSG00000116857.16	TMEM9	chr1	protein_coding	transmembrane protein 9
known_NIR_885	chr1	201153959	201154148	-	201153959	201171490	A5SS	ENST00000367333.6	known	0.67	22	11	22	11	y	1	25	0	25	0	n	1	29	0	29	0	n	1	42	0	42	0	n	ENSG00000116857.16	TMEM9	chr1	protein_coding	transmembrane protein 9
known_NIR_886	chr1	201153959	201171490	-	201153959	201154445	5pMXE	ENST00000367334.9	known	0.14	11	66	11	66	y	0	0	91	0	91	n	0	0	82	0	82	n	0	0	108	0	108	n	ENSG00000116857.16	TMEM9	chr1	protein_coding	transmembrane protein 9
known_NIR_887	chr1	201496304	201506624	-	201496304	201507070	A5SS	ENST00000367306.5	known	0	0	853	0	853	n	0.04	33	816	33	816	y	0	0	543	0	543	n	0	0	721	0	721	n	ENSG00000159176.13	CSRP1	chr1	protein_coding	cysteine and glycine-rich protein 1
known_NIR_888	chr1	201786577;201788638	201788468;201789740	+	201786577	201789740	cassetteExon	ENST00000367302.5	known	0.58	72.5	53	84;61	53	y	0.78	43	12	40;46	12	y	0.49	28	29	37;19	29	y	0.82	79.5	17	91;68	17	y	ENSG00000134369.15	NAV1	chr1	protein_coding	neuron navigator 1
known_NIR_889	chr1	201989531	201997319	+	201989531;201996263	201996147;201997319	ES	ENST00000295640.8	known	0	0	363	0	305;421	n	0	0	255.5	0	251;260	n	0.01	5	334	5	355;313	y	0.02	9	473	9	554;392	y	ENSG00000176393.10	RNPEP	chr1	protein_coding	arginyl aminopeptidase (aminopeptidase B)
known_NIR_890	chr1	202000327	202001011	-	202000327	202009800	A5SS	ENST00000419190.1	known	0	0	41	0	41	n	0.17	3	15	3	15	y	0	0	65	0	65	n	0.2	12	49	12	49	y	ENSG00000234678.1	RP11-465N4.4	chr1	antisense		--
known_NIR_891	chr1	202010820	202011129	+	202010706	202011129	A5SS	ENST00000367284.9	known	0.02	7	341	7	341	y	0.06	21	314	21	314	y	0.07	24	311	24	311	y	0.02	9	369	9	369	y	ENSG00000163435.15	ELF3	chr1	protein_coding	E74-like factor 3 (ets domain transcription factor, epithelial-specific )
known_NIR_892	chr1	202135220	202135707	-	202135220;202135526	202135459;202135707	ES	ENST00000272217.6	known	0.09	14	140.5	14	143;138	y	0.08	6	68.5	6	78;59	y	0.03	2	76	2	81;71	y	0.05	7	126.5	7	135;118	y	ENSG00000143862.7	ARL8A	chr1	protein_coding	ADP-ribosylation factor-like 8A
known_NIR_893	chr1	202764145;202766504	202766397;202766926	-	202764145	202766926	cassetteExon	ENST00000367265.7	known	0.13	12	78	13;11	78	y	0.36	14.5	26	3;26	26	y	0.35	42	79	38;46	79	y	0.18	26.5	123	22;31	123	y	ENSG00000117139.16	KDM5B	chr1	protein_coding	lysine (K)-specific demethylase 5B
known_NIR_894	chr1	202858164	202858882	-	202853280	202858882	A3SS	ENST00000443294.5	known	-	-	-	-	-	-	0.37	7	12	7	12	y	-	-	-	-	-	-	0.41	9	13	9	13	y	ENSG00000214796.8	RP11-480I12.5	chr1	transcribed_unprocessed_pseudogene		--
known_NIR_895	chr1	202892659	202894184	-	202892659;202893425	202893239;202894184	ES	ENST00000367261.7	known	0	0	27.5	0	28;27	n	0	0	39.5	0	51;28	n	0.17	22	108.5	22	65;152	y	0.2	16	63.5	16	77;50	y	ENSG00000117153.15	KLHL12	chr1	protein_coding	kelch-like family member 12
known_NIR_896	chr1	203795775	203796293	+	203795794	203796293	A5SS	ENST00000367214.5	known	1	6	0	6	0	n	0.32	13	28	13	28	y	0.71	52	21	52	21	y	0.25	15	46	15	46	y	ENSG00000058673.15	ZC3H11A	chr1	protein_coding	zinc finger CCCH-type containing 11A
known_NIR_897	chr1	203796496	203801575	+	203796601	203801575	A5SS	ENST00000367214.5	known	0.74	14	5	14	5	y	0.86	49	8	49	8	y	0.92	47	4	47	4	y	0.65	15	8	15	8	y	ENSG00000058673.15	ZC3H11A	chr1	protein_coding	zinc finger CCCH-type containing 11A
known_NIR_898	chr1	203801628	203802957	+	203801628	203802652	A3SS	ENST00000367214.5	known	1	12	0	12	0	n	0.95	36	2	36	2	y	1	11	0	11	0	n	1	32	0	32	0	n	ENSG00000058673.15	ZC3H11A	chr1	protein_coding	zinc finger CCCH-type containing 11A
known_NIR_899	chr1	204261508	204264942	-	204261448	204264942	A3SS	ENST00000272203.7	known	0.6	6	4	6	4	y	0.46	11	13	11	13	y	1	27	0	27	0	n	0.56	15	12	15	12	y	ENSG00000143850.12	PLEKHA6	chr1	protein_coding	pleckstrin homology domain containing, family A member 6
known_NIR_900	chr1	204532246	204537459	+	204532246	204537430	A3SS	ENST00000454264.6	known	-	-	-	-	-	-	-	-	-	-	-	-	0.27	3	8	3	8	y	-	-	-	-	-	-	ENSG00000198625.12	MDM4	chr1	protein_coding	MDM4, p53 regulator
known_NIR_901	chr1	204532246	204538209	+	204537497	204538209	A5SS&ES	ENST00000614459.4	known	1	12	0	12	0	n	-	-	-	-	-	-	0.65	22	12	22	12	y	0.94	32	2	32	2	y	ENSG00000198625.12	MDM4	chr1	protein_coding	MDM4, p53 regulator
known_NIR_902	chr1	204532246;204537497	204537430;204538209	+	204532246	204538209	cassetteExon	ENST00000391947.6	known	0	0	12	0;0	12	n	-	-	-	-	-	-	0.31	10	22	8;12	22	y	0.03	1	32	0;2	32	n	ENSG00000198625.12	MDM4	chr1	protein_coding	MDM4, p53 regulator
known_NIR_903	chr1	204532246;204537497	204537459;204538209	+	204532246	204538209	cassetteExon	ENST00000391947.6	known	0	0	12	0;0	12	n	-	-	-	-	-	-	0.25	7.5	22	3;12	22	y	0.03	1	32	0;2	32	n	ENSG00000198625.12	MDM4	chr1	protein_coding	MDM4, p53 regulator
known_NIR_904	chr1	205088815	205094987	-	205088815	205094873	A5SS	ENST00000264515.10	known	0	0	46	0	46	n	0.23	12	41	12	41	y	0.13	13	90	13	90	y	0.35	21	39	21	39	y	ENSG00000117222.13	RBBP5	chr1	protein_coding	retinoblastoma binding protein 5
known_NIR_905	chr1	205147745;205148339	205148205;205150680	-	205147745	205150680	cassetteExon	ENST00000367161.7	known	0.74	26	9	25;27	9	y	1	15	0	4;26	0	n	1	27	0	24;30	0	n	0.39	9	14	11;7	14	y	ENSG00000133059.16	DSTYK	chr1	protein_coding	dual serine/threonine and tyrosine protein kinase
known_NIR_906	chr1	205504878	205523147	+	205504796	205523147	A5SS	ENST00000429964.6	known	0.61	39	25	39	25	y	0.21	10	37	10	37	y	0.54	33	28	33	28	y	0.55	49	40	49	40	y	ENSG00000117266.15	CDK18	chr1	protein_coding	cyclin-dependent kinase 18
known_NIR_907	chr1	205523715	205524232	+	205523625	205524232	A5SS	ENST00000429964.6	known	0.18	6	27	6	27	y	0.22	5	18	5	18	y	0.14	6	37	6	37	y	0.21	10	38	10	38	y	ENSG00000117266.15	CDK18	chr1	protein_coding	cyclin-dependent kinase 18
known_NIR_908	chr1	205771653	205774833	-	205771653;205772567	205772496;205774833	ES	ENST00000367139.7	known	0	0	65	0	77;53	n	0.07	2	25.5	2	25;26	y	0	0	66.5	0	87;46	n	0	0	77.5	0	94;61	n	ENSG00000117280.12	RAB29	chr1	protein_coding	RAB29, member RAS oncogene family
known_NIR_909	chr1	205772567	205775273	-	205772567	205774833	A5SS&ES	ENST00000235932.8	known	0	0	53	0	53	n	0	0	26	0	26	n	0.39	30	46	30	46	y	0.15	11	61	11	61	y	ENSG00000117280.12	RAB29	chr1	protein_coding	RAB29, member RAS oncogene family
known_NIR_910	chr1	205772567	205775273	-	205772567;205775086	205774833;205775273	ES	ENST00000367139.7	known	0	0	26.5	0	53;0	n	0	0	13	0	26;0	n	0.5	30	30	30	46;14	y	0.25	11	33.5	11	61;6	y	ENSG00000117280.12	RAB29	chr1	protein_coding	RAB29, member RAS oncogene family
known_NIR_911	chr1	205775086	205775374	-	205775086	205775273	A5SS	ENST00000367139.7	known	1	9	0	9	0	n	1	18	0	18	0	n	0.64	25	14	25	14	y	0.81	26	6	26	6	y	ENSG00000117280.12	RAB29	chr1	protein_coding	RAB29, member RAS oncogene family
known_NIR_912	chr1	206199884	206201994	-	206199884	206201874	A5SS	ENST00000367128.7	known	0	0	89	0	89	n	0.06	7	107	7	107	y	0	0	88	0	88	n	0.04	4	98	4	98	y	ENSG00000196550.10	FAM72A	chr1	protein_coding	family with sequence similarity 72, member A
known_NIR_913	chr1	206199884	206203844	-	206199884	206201874	5pMXE	ENST00000367128.7	known	0	0	89	0	89	n	0.04	4	107	4	107	y	0	0	88	0	88	n	0	0	98	0	98	n	ENSG00000196550.10	FAM72A	chr1	protein_coding	family with sequence similarity 72, member A
known_NIR_914	chr1	206199884	206203844	-	206199884	206201994	5pMXE	ENST00000341209.9	known	-	-	-	-	-	-	0.36	4	7	4	7	y	-	-	-	-	-	-	0	0	4	0	4	n	ENSG00000196550.10	FAM72A	chr1	protein_coding	family with sequence similarity 72, member A
known_NIR_915	chr1	206203558	206203844	-	206199884	206203844	A3SS	ENST00000367129.6	known	1	23	0	23	0	n	0.83	20	4	20	4	y	-	-	-	-	-	-	-	-	-	-	-	-	ENSG00000196550.10	FAM72A	chr1	protein_coding	family with sequence similarity 72, member A
known_NIR_916	chr1	206206037	206303281	+	206206037	206384014	A3SS	ENST00000419187.6	known	1	57	0	57	0	n	0.95	105	5	105	5	y	0.99	99	1	99	1	n	0.92	140	12	140	12	y	ENSG00000266028.7	SRGAP2	chr1	protein_coding	SLIT-ROBO Rho GTPase activating protein 2
known_NIR_917	chr1	206343008	206384014	+	206206037	206384014	A5SS	ENST00000419187.6	known	1	35	0	35	0	n	0.83	24	5	24	5	y	0.93	13	1	13	1	n	0.87	83	12	83	12	y	ENSG00000266028.7	SRGAP2	chr1	protein_coding	SLIT-ROBO Rho GTPase activating protein 2
known_NIR_918	chr1	206393673	206401421	+	206393673	206401424	A3SS	ENST00000419187.6	known	0.65	105	56	105	56	y	0.61	59	37	59	37	y	0.54	100	86	100	86	y	0.62	127	79	127	79	y	ENSG00000266028.7	SRGAP2	chr1	protein_coding	SLIT-ROBO Rho GTPase activating protein 2
known_NIR_919	chr1	206453380	206454878	+	206453380	206454144	3pMXE	ENST00000605610.5	known	0.51	37	35	37	35	y	0.84	38	7	38	7	y	0.86	32	5	32	5	y	0.57	39	29	39	29	y	ENSG00000266028.7	SRGAP2	chr1	protein_coding	SLIT-ROBO Rho GTPase activating protein 2
known_NIR_920	chr1	206471245	206474331	+	206471245;206473314	206473196;206474331	ES	ENST00000578328.6	known	0.23	22	74.5	22	107;42	y	0	0	62	0	63;61	n	0.19	20	85	20	76;94	y	0.09	6	61.5	6	63;60	y	ENSG00000263528.7	IKBKE	chr1	protein_coding	inhibitor of kappa light polypeptide gene enhancer in B-cells, kinase epsilon
known_NIR_921	chr1	206493119;206493378	206493266;206493920	+	206493119	206493920	cassetteExon	ENST00000578328.6	known	0.93	49.5	4	42;57	4	y	1	32	0	20;44	0	n	0.83	39.5	8	38;41	8	y	1	40	0	48;32	0	n	ENSG00000263528.7	IKBKE	chr1	protein_coding	inhibitor of kappa light polypeptide gene enhancer in B-cells, kinase epsilon
known_NIR_922	chr1	206635780;206636968	206636875;206637650	+	206635780	206637650	cassetteExon	ENST00000367109.6	known	0.08	1.5	17	3;0	17	n	0.17	3	15	6;0	15	n	0	0	47	0;0	47	n	0.19	10	44	8;12	44	y	ENSG00000143479.15	DYRK3	chr1	protein_coding	dual-specificity tyrosine-(Y)-phosphorylation regulated kinase 3
known_NIR_923	chr1	20670488	20671938	-	20670491	20671938	A3SS	ENST00000375044.5	known	1	9	0	9	0	n	1	16	0	16	0	n	0.71	12	5	12	5	y	0.57	4	3	4	3	n	ENSG00000117245.12	KIF17	chr1	protein_coding	kinesin family member 17
known_NIR_924	chr1	206731919	206732575	+	206731919	206732038	A3SS	ENST00000294981.8	known	0.93	242	19	242	19	y	1	162	0	162	0	n	0.99	270	4	270	4	y	0.91	258	27	258	27	y	ENSG00000162889.10	MAPKAPK2	chr1	protein_coding	mitogen-activated protein kinase-activated protein kinase 2
known_NIR_925	chr1	207025064	207032579	-	207025064;207027679	207027494;207032579	ES	ENST00000359470.5	known	0.32	8	17	8	17;17	y	0	0	8.5	0	7;10	n	0	0	12.5	0	15;10	n	0	0	5.5	0	1;10	n	ENSG00000182795.12	C1orf116	chr1	protein_coding	chromosome 1 open reading frame 116
known_NIR_926	chr1	207071573	207078954	+	207071573	207072204	3pMXE	ENST00000367080.7	known	0.26	19	54	19	54	y	0.29	14	35	14	35	y	0.17	12	60	12	60	y	0.09	4	41	4	41	y	ENSG00000123836.14	PFKFB2	chr1	protein_coding	6-phosphofructo-2-kinase/fructose-2,6-biphosphatase 2
known_NIR_927	chr1	207089361	207089482	+	207088946	207089482	A5SS	ENST00000367078.7	known	0.06	27	448	27	448	y	0.08	55	605	55	605	y	0.03	22	622	22	622	y	0.03	16	585	16	585	y	ENSG00000123843.12	C4BPB	chr1	protein_coding	complement component 4 binding protein, beta
known_NIR_928	chr1	207089589	207090311	+	207089589	207090308	A3SS	ENST00000367078.7	known	0.38	384	631	384	631	y	0.33	380	766	380	766	y	0.27	258	682	258	682	y	0.28	304	772	304	772	y	ENSG00000123843.12	C4BPB	chr1	protein_coding	complement component 4 binding protein, beta
known_NIR_929	chr1	207339417	207359546	+	207339417	207340391	3pMXE	ENST00000367063.6	known	0.86	978	158	978	158	y	0.86	1146	193	1146	193	y	0.91	1722	172	1722	172	y	0.82	1723	387	1723	387	y	ENSG00000196352.13	CD55	chr1	protein_coding	CD55 molecule, decay accelerating factor for complement (Cromer blood group)
known_NIR_930	chr1	207339417;207340508	207340391;207359546	+	207339417	207359546	cassetteExon	ENST00000367064.7	known	0.11	120.5	978	158;83	978	y	0.13	164	1146	193;135	1146	y	0.08	147	1722	172;122	1722	y	0.13	267.5	1723	387;148	1723	y	ENSG00000196352.13	CD55	chr1	protein_coding	CD55 molecule, decay accelerating factor for complement (Cromer blood group)
known_NIR_931	chr1	20776005	20776597	-	20773610	20776597	A3SS	ENST00000312239.9	known	0.12	31	220	31	220	y	0.09	20	215	20	215	y	0.27	85	234	85	234	y	0.22	98	357	98	357	y	ENSG00000127483.17	HP1BP3	chr1	protein_coding	heterochromatin protein 1, binding protein 3
known_NIR_932	chr1	207767195	207767779	+	207767195;207767651	207767607;207767779	ES	ENST00000358170.6	known	1	137	0	137	0;0	n	1	113	0	113	0;0	n	0.99	281	2	281	4;0	n	0.94	339	23.5	339	27;20	y	ENSG00000117335.18	CD46	chr1	protein_coding	CD46 molecule, complement regulatory protein
known_NIR_933	chr1	207767195	207770321	+	207767195;207767823	207767779;207770321	ES	ENST00000354848.5	known	0.7	312	136.5	312	137;136	y	0.71	294	122.5	294	113;132	y	0.61	411	266.5	411	281;252	y	0.59	486	334.5	486	339;330	y	ENSG00000117335.18	CD46	chr1	protein_coding	CD46 molecule, complement regulatory protein
known_NIR_934	chr1	207767195	207783292	+	207767195;207770362	207770321;207783292	ES	ENST00000322918.9	known	0.13	49	342	49	312;372	y	0.12	44	325	44	294;356	y	0.2	126	504.5	126	411;598	y	0.12	92	663.5	92	486;841	y	ENSG00000117335.18	CD46	chr1	protein_coding	CD46 molecule, complement regulatory protein
known_NIR_935	chr1	207767195;207767823	207767607;207770321	+	207767195	207770321	cassetteExon	ENST00000322918.9	known	0.18	68	312	0;136	312	n	0.18	66	294	0;132	294	n	0.24	128	411	4;252	411	y	0.27	178.5	486	27;330	486	y	ENSG00000117335.18	CD46	chr1	protein_coding	CD46 molecule, complement regulatory protein
known_NIR_936	chr1	207767195;207767823	207767607;207783292	+	207767195	207783292	cassetteExon	ENST00000360212.6	known	0.22	14	49	0;28	49	n	0.07	3.5	44	0;7	44	n	0.13	18.5	126	4;33	126	y	0.31	42	92	27;57	92	y	ENSG00000117335.18	CD46	chr1	protein_coding	CD46 molecule, complement regulatory protein
known_NIR_937	chr1	207767195;207767823	207767607;207783292	+	207767195;207770362	207770321;207783292	MXE	ENST00000322918.9	known	0.04	14	342	0;28	312;372	n	0.01	3.5	325	0;7	294;356	n	0.04	18.5	504.5	4;33	411;598	y	0.06	42	663.5	27;57	486;841	y	ENSG00000117335.18	CD46	chr1	protein_coding	CD46 molecule, complement regulatory protein
known_NIR_938	chr1	207767195;207767823	207767779;207783292	+	207767195	207783292	cassetteExon	ENST00000360212.6	known	0.63	82.5	49	137;28	49	y	0.58	60	44	113;7	44	y	0.55	157	126	281;33	126	y	0.68	198	92	339;57	92	y	ENSG00000117335.18	CD46	chr1	protein_coding	CD46 molecule, complement regulatory protein
known_NIR_939	chr1	207767195;207767823	207767779;207783292	+	207767195;207770362	207770321;207783292	MXE	ENST00000322918.9	known	0.19	82.5	342	137;28	312;372	y	0.16	60	325	113;7	294;356	y	0.24	157	504.5	281;33	411;598	y	0.23	198	663.5	339;57	486;841	y	ENSG00000117335.18	CD46	chr1	protein_coding	CD46 molecule, complement regulatory protein
known_NIR_940	chr1	207767823	207783292	+	207767823;207770362	207770321;207783292	ES	ENST00000358170.6	known	0.1	28	254	28	136;372	y	0.03	7	244	7	132;356	y	0.07	33	425	33	252;598	y	0.09	57	585.5	57	330;841	y	ENSG00000117335.18	CD46	chr1	protein_coding	CD46 molecule, complement regulatory protein
known_NIR_941	chr1	207785682	207793519	+	207785682;207790345	207790253;207793519	ES	ENST00000358170.6	known	0.51	210	205.5	210	246;165	y	0.53	274	238.5	274	274;203	y	0.48	445	477	445	564;390	y	0.5	555	550	555	561;539	y	ENSG00000117335.18	CD46	chr1	protein_coding	CD46 molecule, complement regulatory protein
known_NIR_942	chr1	20780540	20786514	-	20780540	20786649	A5SS	ENST00000312239.9	known	0.04	1	26	1	26	n	0.36	16	28	16	28	y	0.08	4	44	4	44	y	0.26	10	29	10	29	y	ENSG00000127483.17	HP1BP3	chr1	protein_coding	heterochromatin protein 1, binding protein 3
known_NIR_943	chr1	20886371	20893517	-	20886371;20892729	20892619;20893517	ES	ENST00000400422.5	known	0.66	59	30	59	15;45	y	0.45	15	18	15	19;17	y	0.79	105	27.5	105	30;25	y	0.72	74	29	74	26;32	y	ENSG00000075151.19	EIF4G3	chr1	protein_coding	eukaryotic translation initiation factor 4 gamma, 3
known_NIR_944	chr1	20904971	20941491	-	20904971	20950003	A5SS	ENST00000374935.7	known	1	66	0	66	0	n	0.91	32	3	32	3	y	1	113	0	113	0	n	1	121	0	121	0	n	ENSG00000075151.19	EIF4G3	chr1	protein_coding	eukaryotic translation initiation factor 4 gamma, 3
known_NIR_945	chr1	20904971	20950003	-	20904971;20942330	20941491;20950003	ES	ENST00000400422.5	known	0	0	59	0	66;52	n	0.08	3	33.5	3	32;35	y	0	0	85	0	113;57	n	0	0	102	0	121;83	n	ENSG00000075151.19	EIF4G3	chr1	protein_coding	eukaryotic translation initiation factor 4 gamma, 3
known_NIR_946	chr1	20941395	20941491	-	20904971	20941491	A3SS	ENST00000400422.5	known	0	0	66	0	66	n	0	0	32	0	32	n	0.03	4	113	4	113	y	0	0	121	0	121	n	ENSG00000075151.19	EIF4G3	chr1	protein_coding	eukaryotic translation initiation factor 4 gamma, 3
known_NIR_947	chr1	20942330	20950003	-	20904971	20950003	A3SS	ENST00000374935.7	known	1	52	0	52	0	n	0.92	35	3	35	3	y	1	57	0	57	0	n	1	83	0	83	0	n	ENSG00000075151.19	EIF4G3	chr1	protein_coding	eukaryotic translation initiation factor 4 gamma, 3
known_NIR_948	chr1	20950111	20969474	-	20950108	20969474	A3SS	ENST00000400422.5	known	0.64	53	30	53	30	y	0.56	35	27	35	27	y	0.67	68	33	68	33	y	0.63	57	33	57	33	y	ENSG00000075151.19	EIF4G3	chr1	protein_coding	eukaryotic translation initiation factor 4 gamma, 3
known_NIR_949	chr1	20981227;20997633	20997601;21002713	-	20981227	21002713	cassetteExon	ENST00000400422.5	known	0.02	1	49	1;1	49	n	0.25	7.5	22	10;5	22	y	0	0	72	0;0	72	n	0	0	61	0;0	61	n	ENSG00000075151.19	EIF4G3	chr1	protein_coding	eukaryotic translation initiation factor 4 gamma, 3
known_NIR_950	chr1	210231771	210233635	-	210231771	210232698	5pMXE	ENST00000475406.5	known	0.72	21	8	21	8	y	0.61	14	9	14	9	y	1	18	0	18	0	n	1	10	0	10	0	n	ENSG00000203706.8	SERTAD4-AS1	chr1	antisense	SERTAD4 antisense RNA 1
known_NIR_951	chr1	210439753	210464505	+	210418325	210464505	A5SS	ENST00000541565.5	known	0.32	9	19	9	19	y	1	31	0	31	0	n	1	13	0	13	0	n	1	18	0	18	0	n	ENSG00000054392.12	HHAT	chr1	protein_coding	hedgehog acyltransferase
known_NIR_952	chr1	211304140	211313424	+	211304140	211312720	3pMXE	ENST00000452621.6	known	0	0	81	0	81	n	0.16	11	56	11	56	y	0	0	18	0	18	n	0.03	2	56	2	56	y	ENSG00000117625.13	RCOR3	chr1	protein_coding	REST corepressor 3
known_NIR_953	chr1	211304140;211312961	211312720;211313424	+	211304140	211313424	cassetteExon	ENST00000367006.8	known	1	44	0	81;7	0	n	0.75	32.5	11	56;9	11	y	1	20	0	18;22	0	n	0.95	40	2	56;24	2	y	ENSG00000117625.13	RCOR3	chr1	protein_coding	REST corepressor 3
known_NIR_954	chr1	211663652	211667106	-	211658712	211667106	A3SS	ENST00000540251.5	known	1	113	0	113	0	n	1	123	0	123	0	n	0.98	185	3	185	3	y	1	197	0	197	0	n	ENSG00000117650.12	NEK2	chr1	protein_coding	NIMA-related kinase 2
known_NIR_955	chr1	211946645	211952569	-	211946705	211952569	A3SS	ENST00000366994.7	known	0.02	2	99	2	99	y	0	0	137	0	137	n	0	0	131	0	131	n	0.13	10	68	10	68	y	ENSG00000143493.12	INTS7	chr1	protein_coding	integrator complex subunit 7
known_NIR_956	chr1	212035942;212043118	212042993;212044660	+	212035942	212044660	cassetteExon	ENST00000542077.5	known	1	184.5	0	232;137	0	n	0.97	166.5	5	194;139	5	y	0.99	278.5	2	352;205	2	y	0.93	287.5	23	351;224	23	y	ENSG00000143476.17	DTL	chr1	protein_coding	denticleless E3 ubiquitin protein ligase homolog (Drosophila)
known_NIR_957	chr1	21220131	21225250	-	21220131;21221842	21221747;21225250	ES	ENST00000415912.6	known	0.03	12	456	12	481;431	y	0	0	395.5	0	440;351	n	0	0	402.5	0	444;361	n	0.02	8	450	8	449;451	y	ENSG00000117298.14	ECE1	chr1	protein_coding	endothelin converting enzyme 1
known_NIR_958	chr1	212608930	212615018	+	212565483	212615018	A5SS	ENST00000366987.6	known	1	71	0	71	0	n	0.95	73	4	73	4	y	1	69	0	69	0	n	0.99	82	1	82	1	n	ENSG00000162772.16	ATF3	chr1	protein_coding	activating transcription factor 3
known_NIR_959	chr1	212738686	212782372	-	212738686;212739601	212739534;212782372	ES	ENST00000366977.7	known	0.06	6	89.5	6	108;71	y	0.16	23	121.5	23	110;133	y	0	0	139	0	149;129	n	0.17	32	161	32	176;146	y	ENSG00000117697.14	NSL1	chr1	protein_coding	NSL1, MIS12 kinetochore complex component
known_NIR_960	chr1	212796590	212802701	+	212796590;212797196	212797112;212802701	ES	ENST00000532324.5	known	0	0	54	0	58;50	n	0	0	92.5	0	82;103	n	0	0	88.5	0	86;91	n	0.17	10	49.5	10	45;54	y	ENSG00000203705.10	TATDN3	chr1	protein_coding	TatD DNase domain containing 3
known_NIR_961	chr1	212796590;212797196	212797112;212804320	+	212796590;212802763	212802701;212804320	MXE	ENST00000530441.5	known	0.5	29	29	58;0	0;58	n	0.51	41	39	82;0	0;78	n	0.56	43	34	86;0	0;68	n	0.33	24.5	49.5	45;4	10;89	y	ENSG00000203705.10	TATDN3	chr1	protein_coding	TatD DNase domain containing 3
known_NIR_962	chr1	212797196	212804320	+	212797196;212802763	212802701;212804320	ES	ENST00000532324.5	known	0	0	54	0	50;58	n	0	0	90.5	0	103;78	n	0	0	79.5	0	91;68	n	0.05	4	71.5	4	54;89	y	ENSG00000203705.10	TATDN3	chr1	protein_coding	TatD DNase domain containing 3
known_NIR_963	chr1	212807848	212812248	+	212807848	212812227	A3SS	ENST00000532324.5	known	1	39	0	39	0	n	1	28	0	28	0	n	0.83	20	4	20	4	y	0.93	63	5	63	5	y	ENSG00000203705.10	TATDN3	chr1	protein_coding	TatD DNase domain containing 3
known_NIR_964	chr1	212807848	212812251	+	212807848	212812227	A3SS	ENST00000532324.5	known	1	16	0	16	0	n	1	2	0	2	0	n	0.9	36	4	36	4	y	0.75	15	5	15	5	y	ENSG00000203705.10	TATDN3	chr1	protein_coding	TatD DNase domain containing 3
known_NIR_965	chr1	212807848	212812251	+	212807848	212812248	A3SS	ENST00000366974.8	known	0.29	16	39	16	39	y	0.07	2	28	2	28	y	0.64	36	20	36	20	y	0.19	15	63	15	63	y	ENSG00000203705.10	TATDN3	chr1	protein_coding	TatD DNase domain containing 3
known_NIR_966	chr1	212857172	212857766	-	212854309	212857766	A3SS	ENST00000356684.7	known	1	35	0	35	0	n	1	15	0	15	0	n	0.81	34	8	34	8	y	1	27	0	27	0	n	ENSG00000198468.7	FLVCR1-AS1	chr1	lincRNA	FLVCR1 antisense RNA 1 (head to head)
known_NIR_967	chr1	21290156	21290364	-	21290156	21345376	A5SS	ENST00000415912.6	known	0.09	27	261	27	261	y	0.11	21	168	21	168	y	0.16	35	188	35	188	y	0.09	28	271	28	271	y	ENSG00000117298.14	ECE1	chr1	protein_coding	endothelin converting enzyme 1
known_NIR_968	chr1	212950740	212961166	+	212950740;212951818	212951339;212961166	ES	ENST00000366964.7	known	0	0	1	0	2;0	n	0	0	9.5	0	15;4	n	0.19	3	13	3	22;4	y	0	0	7	0	5;9	n	ENSG00000143494.15	VASH2	chr1	protein_coding	vasohibin 2
known_NIR_969	chr1	213008466	213015613	-	213008466	213013093	5pMXE	ENST00000621746.1	known	0.2	3	12	3	12	y	0.17	10	49	10	49	y	0	0	14	0	14	n	0.03	2	70	2	70	y	ENSG00000174606.12	ANGEL2	chr1	protein_coding	angel homolog 2 (Drosophila)
known_NIR_970	chr1	213008466	213015613	-	213008466;213013418	213013093;213015613	ES	ENST00000366962.7	known	0.16	3	16	3	12;20	y	0.21	10	37.5	10	49;26	y	0	0	20.5	0	14;27	n	0.04	2	46	2	70;22	y	ENSG00000174606.12	ANGEL2	chr1	protein_coding	angel homolog 2 (Drosophila)
known_NIR_971	chr1	213051509	213077696	+	213051509;213071041	213071006;213077696	ES	ENST00000615329.4	known	0	0	4	0	6;2	n	0.18	6	27.5	6	26;29	y	0.24	17	55	17	54;56	y	0.17	4	19.5	4	20;19	y	ENSG00000136643.11	RPS6KC1	chr1	protein_coding	ribosomal protein S6 kinase, 52kDa, polypeptide 1
known_NIR_972	chr1	213167973	213230497	+	213167973	213176400	A3SS&ES	ENST00000615329.4	known	0.63	27	16	27	16	y	0.76	16	5	16	5	y	0.79	72	19	72	19	y	0.43	20	27	20	27	y	ENSG00000136643.11	RPS6KC1	chr1	protein_coding	ribosomal protein S6 kinase, 52kDa, polypeptide 1
known_NIR_973	chr1	213167973	213230497	+	213167973;213176492	213176400;213230497	ES	ENST00000543354.5	known	0.6	27	18	27	16;20	y	0.62	16	10	16	5;15	y	0.82	72	15.5	72	19;12	y	0.38	20	32.5	20	27;38	y	ENSG00000136643.11	RPS6KC1	chr1	protein_coding	ribosomal protein S6 kinase, 52kDa, polypeptide 1
known_NIR_974	chr1	214652989	214653485	+	214652989	214655241	A3SS	ENST00000366955.7	known	0	0	67	0	67	n	0.06	4	68	4	68	y	0	0	111	0	111	n	0	0	33	0	33	n	ENSG00000117724.12	CENPF	chr1	protein_coding	centromere protein F, 350/400kDa
known_NIR_975	chr1	21468585	21468688	+	21445219	21468688	A5SS	ENST00000342104.9	known	-	-	-	-	-	-	0.67	10	5	10	5	y	0	0	2	0	2	n	1	13	0	13	0	n	ENSG00000142794.18	NBPF3	chr1	protein_coding	neuroblastoma breakpoint family, member 3
known_NIR_976	chr1	21509517	21560626	+	21509517;21554142	21553978;21560626	ES	ENST00000374840.7	known	0.07	64	833.5	64	627;1040	y	0.03	26	809.5	26	573;1046	y	0.07	59	793.5	59	529;1058	y	0.05	55	1082.5	55	786;1379	y	ENSG00000162551.13	ALPL	chr1	protein_coding	alkaline phosphatase, liver/bone/kidney
known_NIR_977	chr1	21551428	21553978	+	21509517	21553978	A5SS	ENST00000374840.7	known	0.02	11	627	11	627	y	0	0	573	0	573	n	0	0	529	0	529	n	0.02	12	786	12	786	y	ENSG00000162551.13	ALPL	chr1	protein_coding	alkaline phosphatase, liver/bone/kidney
known_NIR_978	chr1	21560745	21563110	+	21560745;21561212	21561097;21563110	ES	ENST00000374840.7	known	0.01	14	1090	14	1072;1108	y	0.02	18	986.5	18	914;1059	y	0.01	10	1103	10	982;1224	y	0.02	33	1479	33	1369;1589	y	ENSG00000162551.13	ALPL	chr1	protein_coding	alkaline phosphatase, liver/bone/kidney
known_NIR_979	chr1	21598040	21598400	-	21598064	21598400	A3SS	ENST00000290101.8	known	0.21	33	122	33	122	y	0.2	14	56	14	56	y	0	0	66	0	66	n	0.23	22	74	22	74	y	ENSG00000076864.19	RAP1GAP	chr1	protein_coding	RAP1 GTPase activating protein
known_NIR_980	chr1	21602913;21603912	21603835;21606066	-	21602913	21606066	cassetteExon	ENST00000374761.6	known	0	0	214	0;0	214	n	0.03	6.5	191	6;7	191	y	0	0	64	0;0	64	n	0	0	149	0;0	149	n	ENSG00000076864.19	RAP1GAP	chr1	protein_coding	RAP1 GTPase activating protein
known_NIR_981	chr1	21620050	21622339	-	21620050	21626304	A5SS	ENST00000290101.8	known	0.11	17	143	17	143	y	0.14	20	126	20	126	y	0.18	10	46	10	46	y	0.18	22	99	22	99	y	ENSG00000076864.19	RAP1GAP	chr1	protein_coding	RAP1 GTPase activating protein
known_NIR_982	chr1	21649796	21651779	-	21649796	21665211	A5SS	ENST00000542643.6	known	1	50	0	50	0	n	1	39	0	39	0	n	1	27	0	27	0	n	0.87	26	4	26	4	y	ENSG00000076864.19	RAP1GAP	chr1	protein_coding	RAP1 GTPase activating protein
known_NIR_983	chr1	21690099;21695221	21695066;21701498	-	21690099	21701498	cassetteExon	ENST00000400301.5	known	1	37	0	48;26	0	n	1	84	0	42;126	0	n	0.97	159.5	5	107;212	5	y	0.95	124.5	7	44;205	7	y	ENSG00000090686.15	USP48	chr1	protein_coding	ubiquitin specific peptidase 48
known_NIR_984	chr1	21721163	21721650	-	21721166	21721650	A3SS	ENST00000400301.5	known	0.59	26	18	26	18	y	0.52	38	35	38	35	y	0.33	14	29	14	29	y	0.31	38	83	38	83	y	ENSG00000090686.15	USP48	chr1	protein_coding	ubiquitin specific peptidase 48
known_NIR_985	chr1	21729829	21736446	-	21729832	21736446	A3SS	ENST00000400301.5	known	0	0	85	0	85	n	0.07	6	77	6	77	y	0.13	26	172	26	172	y	0.12	18	133	18	133	y	ENSG00000090686.15	USP48	chr1	protein_coding	ubiquitin specific peptidase 48
known_NIR_986	chr1	217610192	217610321	-	217514889	217610321	A3SS	ENST00000366935.7	known	0.93	27	2	27	2	y	0.97	61	2	61	2	y	0.71	46	19	46	19	y	0.67	52	26	52	26	y	ENSG00000092978.10	GPATCH2	chr1	protein_coding	G patch domain containing 2
known_NIR_987	chr1	2189781	2193639	-	2185513	2193639	A3SS	ENST00000400919.7	known	0.96	159	7	159	7	y	1	146	0	146	0	n	0.96	98	4	98	4	y	0.75	73	24	73	24	y	ENSG00000162585.16	FAAP20	chr1	protein_coding		--
known_NIR_988	chr1	219179246	219193130	+	219179246	219193082	A3SS	ENST00000366928.9	known	0.01	2	141	2	141	y	0.02	2	115	2	115	y	0.06	6	93	6	93	y	0	0	86	0	86	n	ENSG00000143353.11	LYPLAL1	chr1	protein_coding	lysophospholipase-like 1
known_NIR_989	chr1	2193910;2194133	2193998;2194688	-	2193910	2194688	cassetteExon	ENST00000400919.7	known	0.99	174.5	2	259;90	2	y	0.98	175	3	213;137	3	y	1	124	0	163;85	0	n	0.97	130.5	4	173;88	4	y	ENSG00000162585.16	FAAP20	chr1	protein_coding		--
known_NIR_990	chr1	220069432	220073967	-	220069432;220072957	220072850;220073967	ES	ENST00000544404.5	known	0	0	149.5	0	105;194	n	0.05	12	245.5	12	233;258	y	0.05	11	221	11	184;258	y	0.04	11	293.5	11	301;286	y	ENSG00000162813.17	BPNT1	chr1	protein_coding	3'(2'), 5'-bisphosphate nucleotidase 1
known_NIR_991	chr1	220074071	220079727	-	220074071	220089644	A5SS	ENST00000544404.5	known	1	210	0	210	0	n	1	278	0	278	0	n	0.95	298	16	298	16	y	1	415	0	415	0	n	ENSG00000162813.17	BPNT1	chr1	protein_coding	3'(2'), 5'-bisphosphate nucleotidase 1
known_NIR_992	chr1	22052742	22078429	+	22052742;22074219	22074094;22078429	ES	ENST00000344548.7	known	0.97	473	12.5	473	0;25	n	0.92	507	47	507	26;68	y	0.95	631	31.5	631	0;63	n	0.91	644	60.5	644	43;78	y	ENSG00000070831.15	CDC42	chr1	protein_coding	cell division cycle 42
known_NIR_993	chr1	22052742	22078429	+	22052868	22078429	A5SS	ENST00000400259.5	known	0.93	473	35	473	35	y	0.96	507	22	507	22	y	0.95	631	30	631	30	y	0.95	644	34	644	34	y	ENSG00000070831.15	CDC42	chr1	protein_coding	cell division cycle 42
known_NIR_994	chr1	220598379	220604067	+	220598379;220599863	220599798;220604067	ES	ENST00000611084.4	known	0	0	9	0	12;6	n	0.4	6	9	6	12;6	y	0	0	14	0	12;16	n	0	0	19	0	20;18	n	ENSG00000116141.15	MARK1	chr1	protein_coding	MAP/microtubule affinity-regulating kinase 1
known_NIR_995	chr1	220653352	220661812	+	220653352;220657834	220657790;220661812	ES	ENST00000611084.4	known	0.9	31	3.5	31	4;3	y	0	0	1	0	1;1	n	0.53	35	31.5	35	33;30	y	0.67	10	5	10	7;3	y	ENSG00000116141.15	MARK1	chr1	protein_coding	MAP/microtubule affinity-regulating kinase 1
known_NIR_996	chr1	22074219	22078429	+	22052868	22078429	A5SS	ENST00000400259.5	known	0.42	25	35	25	35	y	0.76	68	22	68	22	y	0.68	63	30	63	30	y	0.7	78	34	78	34	y	ENSG00000070831.15	CDC42	chr1	protein_coding	cell division cycle 42
known_NIR_997	chr1	22086866	22089943	+	22086866	22091428	A3SS	ENST00000400259.5	known	0	0	832	0	832	n	0.03	29	1044	29	1044	y	0.02	24	1051	24	1051	y	0.01	18	1341	18	1341	y	ENSG00000070831.15	CDC42	chr1	protein_coding	cell division cycle 42
known_NIR_998	chr1	222479558	222486057	-	222479558;222480426	222480303;222486057	ES	ENST00000621440.1	known	1	1	0	1	0;0	n	1	35	0	35	0;0	n	1	13	0	13	0;0	n	0.88	41	5.5	41	6;5	y	ENSG00000276997.4	RP11-378J18.9	chr1	lincRNA		--
known_NIR_999	chr1	222644586	222645554	+	222633249	222645554	A5SS	ENST00000344922.9	known	0.91	31	3	31	3	y	0.76	29	9	29	9	y	0.56	45	36	45	36	y	0.64	28	16	28	16	y	ENSG00000154305.16	MIA3	chr1	protein_coding	melanoma inhibitory activity family, member 3
known_NIR_1000	chr1	222713416	222715684	+	222712942	222715684	A5SS	ENST00000340934.9	known	0	0	42	0	42	n	0.12	4	30	4	30	y	0.29	25	60	25	60	y	0.42	27	38	27	38	y	ENSG00000162819.11	BROX	chr1	protein_coding	BRO1 domain and CAAX motif containing
known_NIR_1001	chr1	222719359	222724092	+	222719359;222722514	222722419;222724092	ES	ENST00000340934.9	known	0.52	24	22	24	20;24	y	0.29	19	47.5	19	40;55	y	0.09	13	131.5	13	154;109	y	0.11	14	108.5	14	94;123	y	ENSG00000162819.11	BROX	chr1	protein_coding	BRO1 domain and CAAX motif containing
known_NIR_1002	chr1	222730177	222732628	+	222730177;222731516	222731357;222732628	ES	ENST00000340934.9	known	0	0	59	0	46;72	n	0.11	8	66.5	8	81;52	y	0.06	12	179.5	12	193;166	y	0.11	21	171	21	172;170	y	ENSG00000162819.11	BROX	chr1	protein_coding	BRO1 domain and CAAX motif containing
known_NIR_1003	chr1	223712877	223717762	+	223701831	223717762	A5SS	ENST00000433674.6	known	0.95	896	44	896	44	y	0.95	929	51	929	51	y	0.98	930	19	930	19	y	0.97	1050	34	1050	34	y	ENSG00000162909.17	CAPN2	chr1	protein_coding	calpain 2, (m/II) large subunit
known_NIR_1004	chr1	223814353	223821220	-	223814353;223818337	223818206;223821220	ES	ENST00000391878.6	known	0.92	116	10	116	6;14	y	0.89	58	7.5	58	4;11	y	0.97	185	5.5	185	6;5	y	0.89	137	17.5	137	18;17	y	ENSG00000143514.16	TP53BP2	chr1	protein_coding	tumor protein p53 binding protein 2
known_NIR_1005	chr1	224134212	224157352	+	224134212;224153337	224153142;224157352	ES	ENST00000366862.9	known	0	0	38	0	42;34	n	0.07	4	54	4	36;72	y	0	0	67	0	73;61	n	0.03	2	62	2	59;65	y	ENSG00000143756.11	FBXO28	chr1	protein_coding	F-box protein 28
known_NIR_1006	chr1	224300663;224301771	224301691;224303723	-	224300663	224303723	cassetteExon	ENST00000469968.5	known	0.18	7	31	14;0	31	n	0.08	2	23	0;4	23	n	0.16	13	67	17;9	67	y	0.08	7	83	5;9	83	y	ENSG00000143748.17	NVL	chr1	protein_coding	nuclear VCP-like
known_NIR_1007	chr1	224305166;224308263	224307991;224311800	-	224305166	224311800	cassetteExon	ENST00000469968.5	known	1	66	0	56;76	0	n	0.88	51.5	7	19;84	7	y	1	141.5	0	111;172	0	n	1	114.5	0	113;116	0	n	ENSG00000143748.17	NVL	chr1	protein_coding	nuclear VCP-like
known_NIR_1008	chr1	224317930;224326464	224326391;224330071	-	224317930	224330071	cassetteExon	ENST00000469968.5	known	0.7	28	12	48;8	12	y	0.93	98.5	7	121;76	7	y	0.86	81.5	13	95;68	13	y	0.83	158.5	33	202;115	33	y	ENSG00000143748.17	NVL	chr1	protein_coding	nuclear VCP-like
known_NIR_1009	chr1	224365991	224375795	+	224365991	224371283	A3SS&ES	ENST00000366856.3	known	0.02	12	587	12	587	y	0.02	14	733	14	733	y	0.05	30	610	30	610	y	0.07	35	499	35	499	y	ENSG00000143771.11	CNIH4	chr1	protein_coding	cornichon family AMPA receptor auxiliary protein 4
known_NIR_1010	chr1	224365991	224375795	+	224365991;224371423	224371283;224375795	ES	ENST00000465271.5	known	0.02	12	542	12	587;497	y	0.02	14	639.5	14	733;546	y	0.05	30	605	30	610;600	y	0.06	35	566.5	35	499;634	y	ENSG00000143771.11	CNIH4	chr1	protein_coding	cornichon family AMPA receptor auxiliary protein 4
known_NIR_1011	chr1	224371423	224379069	+	224371423	224375795	A3SS	ENST00000465271.5	known	0.05	26	497	26	497	y	0.07	43	546	43	546	y	0.02	15	600	15	600	y	0.01	9	634	9	634	y	ENSG00000143771.11	CNIH4	chr1	protein_coding	cornichon family AMPA receptor auxiliary protein 4
known_NIR_1012	chr1	22491533	22501492	+	22491533	22506049	A3SS	ENST00000374651.8	known	1	14	0	14	0	n	0.64	7	4	7	4	y	0.8	41	10	41	10	y	0.89	56	7	56	7	y	ENSG00000184677.16	ZBTB40	chr1	protein_coding	zinc finger and BTB domain containing 40
known_NIR_1013	chr1	224955098;224960302	224960153;224964479	+	224955098	224964479	cassetteExon	ENST00000445597.6	known	0.68	57	27	93;21	27	y	1	87.5	0	116;59	0	n	0.92	136.5	12	116;157	12	y	0.67	58	28	53;63	28	y	ENSG00000185842.14	DNAH14	chr1	protein_coding	dynein, axonemal, heavy chain 14
known_NIR_1014	chr1	224967514	224968759	+	224967583	224968759	A5SS	ENST00000430092.5	known	0	0	17	0	17	n	0	0	10	0	10	n	0	0	10	0	10	n	0.13	2	13	2	13	y	ENSG00000185842.14	DNAH14	chr1	protein_coding	dynein, axonemal, heavy chain 14
known_NIR_1015	chr1	224967583	224967680	+	224967583	224968759	A3SS	ENST00000430092.5	known	0.45	14	17	14	17	y	0.52	11	10	11	10	y	0.66	19	10	19	10	y	0.65	24	13	24	13	y	ENSG00000185842.14	DNAH14	chr1	protein_coding	dynein, axonemal, heavy chain 14
known_NIR_1016	chr1	22502441	22506049	+	22491533	22506049	A5SS	ENST00000374651.8	known	1	56	0	56	0	n	0.93	51	4	51	4	y	0.88	73	10	73	10	y	0.87	48	7	48	7	y	ENSG00000184677.16	ZBTB40	chr1	protein_coding	zinc finger and BTB domain containing 40
known_NIR_1017	chr1	225501070	225507951	-	225501070;225505053	225504991;225507951	ES	ENST00000366844.7	known	0.92	166	13.5	166	10;17	y	0.82	243	54.5	243	68;41	y	0.93	347	27.5	347	36;19	y	0.89	264	34	264	32;36	y	ENSG00000154380.16	ENAH	chr1	protein_coding	enabled homolog (Drosophila)
known_NIR_1018	chr1	225783368	225789240	+	225783368	225786862	3pMXE	ENST00000619790.4	known	0.79	675	179	675	179	y	0.79	843	227	843	227	y	0.8	964	240	964	240	y	0.86	1061	170	1061	170	y	ENSG00000143742.12	SRP9	chr1	protein_coding	signal recognition particle 9kDa
known_NIR_1019	chr1	225783368;225786985	225786862;225789240	+	225783368	225789240	cassetteExon	ENST00000304786.11	known	0.18	150.5	675	179;122	675	y	0.21	224	843	227;221	843	y	0.21	251.5	964	240;263	964	y	0.15	181	1061	170;192	1061	y	ENSG00000143742.12	SRP9	chr1	protein_coding	signal recognition particle 9kDa
known_NIR_1020	chr1	225810615	225828725	+	225810169	225828725	A5SS	ENST00000272167.9	known	0.04	2	43	2	43	y	0.38	20	33	20	33	y	0.23	21	69	21	69	y	0.16	18	92	18	92	y	ENSG00000143819.12	EPHX1	chr1	protein_coding	epoxide hydrolase 1, microsomal (xenobiotic)
known_NIR_1021	chr1	225921644;225922079	225921858;225922204	-	225921644	225922204	cassetteExon	ENST00000432920.2	known	0.95	285	14	249;321	14	y	0.94	261.5	16	198;325	16	y	0.98	232.5	5	227;238	5	y	1	287.5	0	211;364	0	n	ENSG00000255835.1	RP4-559A3.7	chr1	protein_coding		--
known_NIR_1022	chr1	226287797	226297719	-	226287797;226295946	226295842;226297719	ES	ENST00000328205.9	known	0	0	39.5	0	26;53	n	0.34	25	47.5	25	27;68	y	0.49	68	70	68	70;70	y	0.49	62	65.5	62	47;84	y	ENSG00000183814.15	LIN9	chr1	protein_coding	lin-9 DREAM MuvB core complex component
known_NIR_1023	chr1	226707915	226735527	-	226648771	226735527	A3SS	ENST00000272117.7	known	0.22	4	14	4	14	y	0.3	7	16	7	16	y	0.36	5	9	5	9	y	0.28	16	42	16	42	y	ENSG00000143772.9	ITPKB	chr1	protein_coding	inositol-trisphosphate 3-kinase B
known_NIR_1024	chr1	226875550	226881888	+	226880724	226881888	5pMXE	ENST00000626989.2	known	1	133	0	133	0	n	1	51	0	51	0	n	1	94	0	94	0	n	0.89	96	12	96	12	y	ENSG00000143801.16	PSEN2	chr1	protein_coding	presenilin 2
known_NIR_1025	chr1	226875550;226880724	226880469;226881888	+	226875550	226881888	cassetteExon	ENST00000366783.7	known	0	0	133	0;0	133	n	0.04	2	51	4;0	51	n	0	0	94	0;0	94	n	0.09	9	96	6;12	96	y	ENSG00000143801.16	PSEN2	chr1	protein_coding	presenilin 2
known_NIR_1026	chr1	226891361	226891746	+	226891361	226891743	A3SS	ENST00000366783.7	known	0.22	15	53	15	53	y	0.52	32	29	32	29	y	0.4	28	42	28	42	y	0.45	32	39	32	39	y	ENSG00000143801.16	PSEN2	chr1	protein_coding	presenilin 2
known_NIR_1027	chr1	226940399	226961377	+	226939591	226961377	A5SS	ENST00000366779.5	known	1	71	0	71	0	n	1	34	0	34	0	n	0.79	65	17	65	17	y	0.81	48	11	48	11	y	ENSG00000163050.16	ADCK3	chr1	protein_coding	aarF domain containing kinase 3
known_NIR_1028	chr1	227112422;227112913	227112671;227119804	-	227112422	227119804	cassetteExon	ENST00000366767.7	known	1	13	0	14;12	0	n	0.9	18	2	9;27	2	y	0.67	20	10	22;18	10	y	1	27	0	39;15	0	n	ENSG00000143776.18	CDC42BPA	chr1	protein_coding	CDC42 binding protein kinase alpha (DMPK-like)
known_NIR_1029	chr1	227563724;227582606	227582514;227646544	+	227563724	227646544	cassetteExon	ENST00000343776.9	known	1	2	0	4;0	0	n	1	1.5	0	3;0	0	n	-	-	-	-	-	-	0.73	8	3	12;4	3	y	ENSG00000181450.17	ZNF678	chr1	protein_coding	zinc finger protein 678
known_NIR_1030	chr1	227732676	227732929	-	227732676	227732881	A5SS	ENST00000366758.7	known	0.13	25	164	25	164	y	0.06	11	187	11	187	y	0.07	12	157	12	157	y	0.09	18	181	18	181	y	ENSG00000081692.12	JMJD4	chr1	protein_coding	jumonji domain containing 4
known_NIR_1031	chr1	228082765	228097078	+	228082850	228097078	A5SS	ENST00000540651.5	known	0.97	1216	39	1216	39	y	0.95	1332	73	1332	73	y	0.93	1268	95	1268	95	y	0.98	1389	34	1389	34	y	ENSG00000143761.13	ARF1	chr1	protein_coding	ADP-ribosylation factor 1
known_NIR_1032	chr1	228083374	228097078	+	228082765	228097078	A5SS	ENST00000272102.9	known	0	0	1216	0	1216	n	0.01	7	1332	7	1332	y	0	4	1268	4	1268	y	0	4	1389	4	1389	y	ENSG00000143761.13	ARF1	chr1	protein_coding	ADP-ribosylation factor 1
known_NIR_1033	chr1	228083374	228097078	+	228082850	228097078	A5SS	ENST00000540651.5	known	0	0	39	0	39	n	0.09	7	73	7	73	y	0.04	4	95	4	95	y	0.11	4	34	4	34	y	ENSG00000143761.13	ARF1	chr1	protein_coding	ADP-ribosylation factor 1
known_NIR_1034	chr1	228108318	228108441	-	228108318	228108437	A5SS	ENST00000366732.5	known	0.22	12	43	12	43	y	0.31	31	70	31	70	y	0	0	19	0	19	n	0.34	13	25	13	25	y	ENSG00000162910.18	MRPL55	chr1	protein_coding	mitochondrial ribosomal protein L55
known_NIR_1035	chr1	228108318	228108955	-	228108318	228108437	5pMXE	ENST00000366732.5	known	0.8	170	43	170	43	y	0.78	248	70	248	70	y	0.87	132	19	132	19	y	0.85	147	25	147	25	y	ENSG00000162910.18	MRPL55	chr1	protein_coding	mitochondrial ribosomal protein L55
known_NIR_1036	chr1	228108318	228108955	-	228108474	228108955	A3SS&ES	ENST00000366740.5	known	0.94	170	10	170	10	y	0.9	248	29	248	29	y	0.96	132	6	132	6	y	0.9	147	16	147	16	y	ENSG00000162910.18	MRPL55	chr1	protein_coding	mitochondrial ribosomal protein L55
known_NIR_1037	chr1	228108318	228109149	-	228108318	228108437	5pMXE	ENST00000366732.5	known	0.82	194	43	194	43	y	0.7	165	70	165	70	y	0.83	91	19	91	19	y	0.87	166	25	166	25	y	ENSG00000162910.18	MRPL55	chr1	protein_coding	mitochondrial ribosomal protein L55
known_NIR_1038	chr1	228108318	228109149	-	228108318	228108955	5pMXE	ENST00000366738.5	known	0.53	194	170	194	170	y	0.4	165	248	165	248	y	0.41	91	132	91	132	y	0.53	166	147	166	147	y	ENSG00000162910.18	MRPL55	chr1	protein_coding	mitochondrial ribosomal protein L55
known_NIR_1039	chr1	228108318	228109149	-	228108318;228109021	228108437;228109149	ES	ENST00000366731.9	known	0.72	194	74.5	194	43;106	y	0.59	165	112.5	165	70;155	y	0.51	91	86	91	19;153	y	0.68	166	77.5	166	25;130	y	ENSG00000162910.18	MRPL55	chr1	protein_coding	mitochondrial ribosomal protein L55
known_NIR_1040	chr1	228108318	228109261	-	228108318	228108437	5pMXE	ENST00000366732.5	known	0.52	46	43	46	43	y	0.25	23	70	23	70	y	0.41	13	19	13	19	y	0.48	23	25	23	25	y	ENSG00000162910.18	MRPL55	chr1	protein_coding	mitochondrial ribosomal protein L55
known_NIR_1041	chr1	228108318	228109261	-	228108318	228108441	A5SS&ES	ENST00000366744.5	known	0.79	46	12	46	12	y	0.43	23	31	23	31	y	1	13	0	13	0	n	0.64	23	13	23	13	y	ENSG00000162910.18	MRPL55	chr1	protein_coding	mitochondrial ribosomal protein L55
known_NIR_1042	chr1	228108318	228109261	-	228108318	228108955	5pMXE	ENST00000366738.5	known	0.21	46	170	46	170	y	0.08	23	248	23	248	y	0.09	13	132	13	132	y	0.14	23	147	23	147	y	ENSG00000162910.18	MRPL55	chr1	protein_coding	mitochondrial ribosomal protein L55
known_NIR_1043	chr1	228108318	228109261	-	228108318	228109149	A5SS	ENST00000348259.9	known	0.19	46	194	46	194	y	0.12	23	165	23	165	y	0.12	13	91	13	91	y	0.12	23	166	23	166	y	ENSG00000162910.18	MRPL55	chr1	protein_coding	mitochondrial ribosomal protein L55
known_NIR_1044	chr1	228108318	228109261	-	228109021	228109261	A3SS&ES	ENST00000391867.7	known	0.75	46	15	46	15	y	0.31	23	52	23	52	y	0.48	13	14	13	14	y	0.43	23	30	23	30	y	ENSG00000162910.18	MRPL55	chr1	protein_coding	mitochondrial ribosomal protein L55
known_NIR_1045	chr1	228108318;228108474	228108437;228108955	-	228108318	228108955	cassetteExon	ENST00000366738.5	known	0.13	26.5	170	43;10	170	y	0.17	49.5	248	70;29	248	y	0.09	12.5	132	19;6	132	y	0.12	20.5	147	25;16	147	y	ENSG00000162910.18	MRPL55	chr1	protein_coding	mitochondrial ribosomal protein L55
known_NIR_1046	chr1	228108318;228108474	228108437;228109149	-	228108318	228109149	cassetteExon	ENST00000348259.9	known	0.13	28.5	194	43;14	194	y	0.2	42.5	165	70;15	165	y	0.13	13.5	91	19;8	91	y	0.08	14	166	25;3	166	y	ENSG00000162910.18	MRPL55	chr1	protein_coding	mitochondrial ribosomal protein L55
known_NIR_1047	chr1	228108318;228108474	228108437;228109149	-	228108318;228109021	228108955;228109149	MXE	ENST00000336520.7	known	0.17	28.5	138	43;14	170;106	y	0.17	42.5	201.5	70;15	248;155	y	0.09	13.5	142.5	19;8	132;153	y	0.09	14	138.5	25;3	147;130	y	ENSG00000162910.18	MRPL55	chr1	protein_coding	mitochondrial ribosomal protein L55
known_NIR_1048	chr1	228108318;228108474	228108441;228108955	-	228108318	228108955	cassetteExon	ENST00000366738.5	known	0.06	11	170	12;10	170	y	0.11	30	248	31;29	248	y	0.02	3	132	0;6	132	n	0.09	14.5	147	13;16	147	y	ENSG00000162910.18	MRPL55	chr1	protein_coding	mitochondrial ribosomal protein L55
known_NIR_1049	chr1	228108318;228108474	228108441;228109149	-	228108318	228109149	cassetteExon	ENST00000348259.9	known	0.06	13	194	12;14	194	y	0.12	23	165	31;15	165	y	0.04	4	91	0;8	91	n	0.05	8	166	13;3	166	y	ENSG00000162910.18	MRPL55	chr1	protein_coding	mitochondrial ribosomal protein L55
known_NIR_1050	chr1	228108318;228108474	228108441;228109149	-	228108318;228109021	228108955;228109149	MXE	ENST00000336520.7	known	0.09	13	138	12;14	170;106	y	0.1	23	201.5	31;15	248;155	y	0.03	4	142.5	0;8	132;153	n	0.05	8	138.5	13;3	147;130	y	ENSG00000162910.18	MRPL55	chr1	protein_coding	mitochondrial ribosomal protein L55
known_NIR_1051	chr1	228108318;228109021	228108955;228109149	-	228108318	228109149	cassetteExon	ENST00000348259.9	known	0.42	138	194	170;106	194	y	0.55	201.5	165	248;155	165	y	0.61	142.5	91	132;153	91	y	0.45	138.5	166	147;130	166	y	ENSG00000162910.18	MRPL55	chr1	protein_coding	mitochondrial ribosomal protein L55
known_NIR_1052	chr1	228108318;228109021	228108955;228109261	-	228108318	228109261	cassetteExon	ENST00000366746.7	known	0.67	92.5	46	170;15	46	y	0.87	150	23	248;52	23	y	0.85	73	13	132;14	13	y	0.79	88.5	23	147;30	23	y	ENSG00000162910.18	MRPL55	chr1	protein_coding	mitochondrial ribosomal protein L55
known_NIR_1053	chr1	228108321	228108437	-	228108318	228108437	A3SS	ENST00000366732.5	known	0.3	18	43	18	43	y	0	0	70	0	70	n	0	0	19	0	19	n	0.24	8	25	8	25	y	ENSG00000162910.18	MRPL55	chr1	protein_coding	mitochondrial ribosomal protein L55
known_NIR_1054	chr1	228108321	228108955	-	228108318	228108955	A3SS	ENST00000366738.5	known	0	0	170	0	170	n	0.15	44	248	44	248	y	0.09	13	132	13	132	y	0.23	45	147	45	147	y	ENSG00000162910.18	MRPL55	chr1	protein_coding	mitochondrial ribosomal protein L55
known_NIR_1055	chr1	228108321	228108955	-	228108321	228108437	5pMXE	ENST00000366734.5	known	0	0	18	0	18	n	1	44	0	44	0	n	1	13	0	13	0	n	0.85	45	8	45	8	y	ENSG00000162910.18	MRPL55	chr1	protein_coding	mitochondrial ribosomal protein L55
known_NIR_1056	chr1	228108321	228108955	-	228108321;228108474	228108437;228108955	ES	ENST00000366740.5	known	0	0	14	0	18;10	n	0.75	44	14.5	44	0;29	n	0.81	13	3	13	0;6	n	0.79	45	12	45	8;16	y	ENSG00000162910.18	MRPL55	chr1	protein_coding	mitochondrial ribosomal protein L55
known_NIR_1057	chr1	228108321	228108955	-	228108474	228108955	A3SS&ES	ENST00000366739.5	known	0	0	10	0	10	n	0.6	44	29	44	29	y	0.68	13	6	13	6	y	0.74	45	16	45	16	y	ENSG00000162910.18	MRPL55	chr1	protein_coding	mitochondrial ribosomal protein L55
known_NIR_1058	chr1	228108474	228109149	-	228108474	228108955	5pMXE	ENST00000366740.5	known	0.58	14	10	14	10	y	0.34	15	29	15	29	y	0.57	8	6	8	6	y	0.16	3	16	3	16	y	ENSG00000162910.18	MRPL55	chr1	protein_coding	mitochondrial ribosomal protein L55
known_NIR_1059	chr1	228108474	228109149	-	228109021	228109149	A3SS	ENST00000366731.9	known	0.12	14	106	14	106	y	0.09	15	155	15	155	y	0.05	8	153	8	153	y	0.02	3	130	3	130	y	ENSG00000162910.18	MRPL55	chr1	protein_coding	mitochondrial ribosomal protein L55
known_NIR_1060	chr1	228108474;228109021	228108955;228109149	-	228108474	228109149	cassetteExon	ENST00000336300.9	known	0.81	58	14	10;106	14	y	0.86	92	15	29;155	15	y	0.91	79.5	8	6;153	8	y	0.96	73	3	16;130	3	y	ENSG00000162910.18	MRPL55	chr1	protein_coding	mitochondrial ribosomal protein L55
known_NIR_1061	chr1	228109021	228109261	-	228109021	228109149	A5SS	ENST00000366731.9	known	0.12	15	106	15	106	y	0.25	52	155	52	155	y	0.08	14	153	14	153	y	0.19	30	130	30	130	y	ENSG00000162910.18	MRPL55	chr1	protein_coding	mitochondrial ribosomal protein L55
known_NIR_1062	chr1	228140363	228141124	+	228140363	228145492	A3SS	ENST00000366726.5	known	0.99	123	1	123	1	n	1	100	0	100	0	n	1	105	0	105	0	n	0.94	118	7	118	7	y	ENSG00000143774.16	GUK1	chr1	protein_coding	guanylate kinase 1
known_NIR_1063	chr1	228140363	228145492	+	228140363	228145511	A3SS	ENST00000391865.7	known	0	1	956	1	956	n	0	0	922	0	922	n	0	0	653	0	653	n	0.01	7	925	7	925	y	ENSG00000143774.16	GUK1	chr1	protein_coding	guanylate kinase 1
known_NIR_1064	chr1	228140363	228145511	+	228140159	228145511	A5SS	ENST00000366730.5	known	0.98	956	24	956	24	y	0.95	922	45	922	45	y	0.99	653	6	653	6	y	0.99	925	7	925	7	y	ENSG00000143774.16	GUK1	chr1	protein_coding	guanylate kinase 1
known_NIR_1065	chr1	228140363;228141288	228141124;228145511	+	228140363	228145511	cassetteExon	ENST00000391865.7	known	0.22	265	956	123;407	956	y	0.15	160	922	100;220	922	y	0.21	174	653	105;243	653	y	0.19	214	925	118;310	925	y	ENSG00000143774.16	GUK1	chr1	protein_coding	guanylate kinase 1
known_NIR_1066	chr1	228141288	228145511	+	228140159	228145511	A5SS	ENST00000366730.5	known	0.94	407	24	407	24	y	0.83	220	45	220	45	y	0.98	243	6	243	6	y	0.98	310	7	310	7	y	ENSG00000143774.16	GUK1	chr1	protein_coding	guanylate kinase 1
known_NIR_1067	chr1	228144752	228145511	+	228140159	228145511	A5SS	ENST00000366730.5	known	0.64	43	24	43	24	y	0.34	23	45	23	45	y	0	0	6	0	6	n	0	0	7	0	7	n	ENSG00000143774.16	GUK1	chr1	protein_coding	guanylate kinase 1
known_NIR_1068	chr1	228144752	228145511	+	228140363	228145511	A5SS	ENST00000391865.7	known	0.04	43	956	43	956	y	0.02	23	922	23	922	y	0	0	653	0	653	n	0	0	925	0	925	n	ENSG00000143774.16	GUK1	chr1	protein_coding	guanylate kinase 1
known_NIR_1069	chr1	228144752	228145511	+	228141288	228145511	A5SS	ENST00000312726.8	known	0.1	43	407	43	407	y	0.09	23	220	23	220	y	0	0	243	0	243	n	0	0	310	0	310	n	ENSG00000143774.16	GUK1	chr1	protein_coding	guanylate kinase 1
known_NIR_1070	chr1	228145649	228146026	+	228145624	228146026	A5SS	ENST00000366730.5	known	0.01	27	1797	27	1797	y	0.02	39	1633	39	1633	y	0.02	19	1196	19	1196	y	0.01	20	1476	20	1476	y	ENSG00000143774.16	GUK1	chr1	protein_coding	guanylate kinase 1
known_NIR_1071	chr1	228146067	228146861	+	228146067	228146842	A3SS	ENST00000366730.5	known	0.1	153	1393	153	1393	y	0.1	141	1264	141	1264	y	0.07	74	1016	74	1016	y	0.07	89	1186	89	1186	y	ENSG00000143774.16	GUK1	chr1	protein_coding	guanylate kinase 1
known_NIR_1072	chr1	228147544	228147621	+	228147544	228147615	A3SS	ENST00000366730.5	known	0	6	1644	6	1644	y	0.03	47	1484	47	1484	y	0	2	1538	2	1538	y	0.02	23	1426	23	1426	y	ENSG00000143774.16	GUK1	chr1	protein_coding	guanylate kinase 1
known_NIR_1073	chr1	228147699	228148665	+	228147699;228148456	228148371;228148665	ES	ENST00000366730.5	known	0.17	257	1271.5	257	1357;1186	y	0.16	212	1095	212	1174;1016	y	0.18	235	1057	235	1171;943	y	0.14	187	1116	187	1239;993	y	ENSG00000143774.16	GUK1	chr1	protein_coding	guanylate kinase 1
known_NIR_1074	chr1	228147699;228148539	228148371;228148665	+	228147699	228148665	cassetteExon	ENST00000366728.6	known	0.73	701	257	1357;45	257	y	0.74	593	212	1174;12	212	y	0.72	597.5	235	1171;24	235	y	0.77	626.5	187	1239;14	187	y	ENSG00000143774.16	GUK1	chr1	protein_coding	guanylate kinase 1
known_NIR_1075	chr1	228148539	228148665	+	228148456	228148665	A5SS	ENST00000366730.5	known	0.04	45	1186	45	1186	y	0.01	12	1016	12	1016	y	0.02	24	943	24	943	y	0.01	14	993	14	993	y	ENSG00000143774.16	GUK1	chr1	protein_coding	guanylate kinase 1
known_NIR_1076	chr1	228217288;228219599	228219324;228224459	+	228217288	228224459	cassetteExon	ENST00000284548.15	known	0.32	8	17	12;4	17	y	-	-	-	-	-	-	0.48	6.5	7	13;0	7	n	0.75	12	4	7;17	4	y	ENSG00000154358.19	OBSCN	chr1	protein_coding	obscurin, cytoskeletal calmodulin and titin-interacting RhoGEF
known_NIR_1077	chr1	228353062	228356151	+	228353062	228362576	A3SS	ENST00000422127.5	known	1	66	0	66	0	n	0.74	29	10	29	10	y	0.84	62	12	62	12	y	0.88	53	7	53	7	y	ENSG00000154358.19	OBSCN	chr1	protein_coding	obscurin, cytoskeletal calmodulin and titin-interacting RhoGEF
known_NIR_1078	chr1	22895580	22896411	+	22895580	22896414	A3SS	ENST00000374630.7	known	0.26	29	82	29	82	y	0.47	14	16	14	16	y	0	0	20	0	20	n	0	0	41	0	41	n	ENSG00000133216.16	EPHB2	chr1	protein_coding	EPH receptor B2
known_NIR_1079	chr1	229271370	229286486	+	229271370	229295848	A3SS	ENST00000618010.4	known	1	36	0	36	0	n	0.97	39	1	39	1	n	0.91	52	5	52	5	y	0.9	62	7	62	7	y	ENSG00000168118.11	RAB4A	chr1	protein_coding	RAB4A, member RAS oncogene family
known_NIR_1080	chr1	229288843	229295848	+	229271370	229295848	A5SS	ENST00000618010.4	known	1	228	0	228	0	n	0.99	152	1	152	1	n	0.97	193	5	193	5	y	0.97	208	7	208	7	y	ENSG00000168118.11	RAB4A	chr1	protein_coding	RAB4A, member RAS oncogene family
known_NIR_1081	chr1	229295910	229297482	+	229295910	229297520	A3SS	ENST00000618010.4	known	0.91	213	21	213	21	y	1	209	0	209	0	n	0.96	186	8	186	8	y	0.95	211	11	211	11	y	ENSG00000168118.11	RAB4A	chr1	protein_coding	RAB4A, member RAS oncogene family
known_NIR_1082	chr1	23030634;23044486	23044427;23050387	+	23030634	23050387	cassetteExon	ENST00000356634.7	known	0.21	113.5	434	129;98	434	y	0.3	125.5	294	110;141	294	y	0.19	108	459	95;121	459	y	0.2	130.5	520	155;106	520	y	ENSG00000004487.15	KDM1A	chr1	protein_coding	lysine (K)-specific demethylase 1A
known_NIR_1083	chr1	230688143	230688423	+	230688143	230688420	A3SS	ENST00000366669.8	known	0	0	29	0	29	n	0.22	6	21	6	21	y	0.19	8	35	8	35	y	0	0	28	0	28	n	ENSG00000135775.13	COG2	chr1	protein_coding	component of oligomeric golgi complex 2
known_NIR_1084	chr1	230916299	230920510	-	230916302	230920510	A3SS	ENST00000366661.8	known	-	-	-	-	-	-	0.2	9	35	9	35	y	0.52	14	13	14	13	y	0.47	15	17	15	17	y	ENSG00000143643.12	TTC13	chr1	protein_coding	tetratricopeptide repeat domain 13
known_NIR_1085	chr1	230940556	230943806	-	230940556	230954333	A5SS	ENST00000366662.8	known	1	13	0	13	0	n	1	44	0	44	0	n	0.78	28	8	28	8	y	0.77	33	10	33	10	y	ENSG00000143643.12	TTC13	chr1	protein_coding	tetratricopeptide repeat domain 13
known_NIR_1086	chr1	23094380	23168766	-	23094380;23109127	23109022;23168766	ES	ENST00000418342.5	known	0	0	59	0	82;36	n	0	0	62	0	82;42	n	0.23	13	44.5	13	49;40	y	0	0	74	0	90;58	n	ENSG00000169641.13	LUZP1	chr1	protein_coding	leucine zipper protein 1
known_NIR_1087	chr1	230945454	230954333	-	230940556	230954333	A3SS	ENST00000366662.8	known	1	1	0	1	0	n	1	26	0	26	0	n	0.79	30	8	30	8	y	0.79	37	10	37	10	y	ENSG00000143643.12	TTC13	chr1	protein_coding	tetratricopeptide repeat domain 13
known_NIR_1088	chr1	231229206	231238857	-	231229209	231238857	A3SS	ENST00000366649.6	known	0.45	22	27	22	27	y	0.56	38	30	38	30	y	0.31	29	65	29	65	y	0.29	15	36	15	36	y	ENSG00000143633.12	C1orf131	chr1	protein_coding	chromosome 1 open reading frame 131
known_NIR_1089	chr1	231339868	231351304	+	231339868;231347925	231347797;231351304	ES	ENST00000391858.8	known	0	0	28	0	33;23	n	0	0	35	0	28;42	n	0	0	74.5	0	111;38	n	0.09	8	82.5	8	95;70	y	ENSG00000010072.15	SPRTN	chr1	protein_coding	SprT-like N-terminal domain
known_NIR_1090	chr1	231522637;231524547	231524426;231527338	-	231522637	231527338	cassetteExon	ENST00000440665.5	known	0.14	8	48	0;16	48	n	0.03	3	99	5;1	99	n	0.08	10	111	15;5	111	y	0.05	6.5	122	13;0	122	n	ENSG00000233461.5	RP11-295G20.2	chr1	antisense		--
known_NIR_1091	chr1	23318688	23321528	-	23318697	23321528	A3SS	ENST00000478691.5	known	0.89	526	67	526	67	y	0.89	753	89	753	89	y	0.88	912	125	912	125	y	0.9	1024	120	1024	120	y	ENSG00000125944.18	HNRNPR	chr1	protein_coding	heterogeneous nuclear ribonucleoprotein R
known_NIR_1092	chr1	233218184	233236845	-	233218184;233227371	233227226;233236845	ES	ENST00000258229.13	known	0	0	15	0	20;10	n	0	0	19	0	14;24	n	0.14	4	24.5	4	36;13	y	0	0	27.5	0	32;23	n	ENSG00000135749.18	PCNXL2	chr1	protein_coding	pecanex-like 2 (Drosophila)
known_NIR_1093	chr1	23323732	23337754	-	23323732;23333631	23333518;23337754	ES	ENST00000478691.5	known	0.05	35	644	35	530;758	y	0.05	39	780.5	39	678;883	y	0.12	132	1001	132	920;1082	y	0.1	121	1128.5	121	988;1269	y	ENSG00000125944.18	HNRNPR	chr1	protein_coding	heterogeneous nuclear ribonucleoprotein R
known_NIR_1094	chr1	23338608	23344211	-	23338608	23340852	5pMXE	ENST00000427764.3	known	0.47	256	291	256	291	y	0.45	298	369	298	369	y	0.56	560	449	560	449	y	0.51	510	487	510	487	y	ENSG00000125944.18	HNRNPR	chr1	protein_coding	heterogeneous nuclear ribonucleoprotein R
known_NIR_1095	chr1	23338608;23341017	23340852;23344211	-	23338608	23344211	cassetteExon	ENST00000478691.5	known	0.43	193.5	256	291;96	256	y	0.46	256	298	369;143	298	y	0.37	324.5	560	449;200	560	y	0.38	316.5	510	487;146	510	y	ENSG00000125944.18	HNRNPR	chr1	protein_coding	heterogeneous nuclear ribonucleoprotein R
known_NIR_1096	chr1	23338608;23341020	23340852;23344211	-	23338608	23344211	cassetteExon	ENST00000478691.5	known	0.43	194.5	256	291;98	256	y	0.44	230.5	298	369;92	298	y	0.35	305	560	449;161	560	y	0.38	313.5	510	487;140	510	y	ENSG00000125944.18	HNRNPR	chr1	protein_coding	heterogeneous nuclear ribonucleoprotein R
known_NIR_1097	chr1	23341020	23344211	-	23341017	23344211	A3SS	ENST00000374616.7	known	0.51	98	96	98	96	y	0.39	92	143	92	143	y	0.45	161	200	161	200	y	0.49	140	146	140	146	y	ENSG00000125944.18	HNRNPR	chr1	protein_coding	heterogeneous nuclear ribonucleoprotein R
known_NIR_1098	chr1	23404160	23408664	-	23397955	23408664	A3SS	ENST00000450454.6	known	0.03	2	68	2	68	y	0	0	77	0	77	n	0	0	119	0	119	n	0	0	168	0	168	n	ENSG00000204219.9	TCEA3	chr1	protein_coding	transcription elongation factor A (SII), 3
known_NIR_1099	chr1	234373840	234374230	+	234373678	234374230	A5SS	ENST00000366615.8	known	0.06	39	627	39	627	y	0.14	82	511	82	511	y	0.04	31	744	31	744	y	0.11	57	480	57	480	y	ENSG00000168275.14	COA6	chr1	protein_coding	cytochrome c oxidase assembly factor 6
known_NIR_1100	chr1	234607852	234608447	-	234607852	234608495	A5SS	ENST00000366610.7	known	0.77	225	68	225	68	y	0.54	193	162	193	162	y	0.54	163	140	163	140	y	0.57	198	152	198	152	y	ENSG00000168264.10	IRF2BP2	chr1	protein_coding	interferon regulatory factor 2 binding protein 2
known_NIR_1101	chr1	235196115	235219793	-	235196115;235214026	235213769;235219793	ES	ENST00000366603.6	known	0	0	20.5	0	10;31	n	0.56	10	8	10	11;5	y	0.35	19	35	19	31;39	y	0.33	11	22.5	11	9;36	y	ENSG00000054267.20	ARID4B	chr1	protein_coding	AT rich interactive domain 4B (RBP1-like)
known_NIR_1102	chr1	235328778	235335242	+	235327498	235335242	A5SS	ENST00000488594.5	known	1	179	0	179	0	n	1	167	0	167	0	n	1	71	0	71	0	n	0.87	205	30	205	30	y	ENSG00000152904.11	GGPS1	chr1	protein_coding	geranylgeranyl diphosphate synthase 1
known_NIR_1103	chr1	235328778	235341708	+	235328778;235335334	235335242;235341708	ES	ENST00000282841.9	known	0	0	162	0	179;145	n	0	0	161.5	0	167;156	n	0.12	14	107.5	14	71;144	y	0	0	258.5	0	205;312	n	ENSG00000152904.11	GGPS1	chr1	protein_coding	geranylgeranyl diphosphate synthase 1
known_NIR_1104	chr1	235328778	235341708	+	235335334	235341708	A5SS&ES	ENST00000488594.5	known	0	0	145	0	145	n	0	0	156	0	156	n	0.09	14	144	14	144	y	0	0	312	0	312	n	ENSG00000152904.11	GGPS1	chr1	protein_coding	geranylgeranyl diphosphate synthase 1
known_NIR_1105	chr1	235367504	235380019	+	235367552	235380019	A5SS	ENST00000406207.4	known	0.97	86	3	86	3	y	0.92	113	10	113	10	y	1	116	0	116	0	n	0.98	110	2	110	2	y	ENSG00000116957.12	TBCE	chr1	protein_coding	tubulin folding cofactor E
known_NIR_1106	chr1	235494828;235496308	235496186;235504141	-	235494828	235504141	cassetteExon	ENST00000366600.7	known	0.33	9.5	19	8;11	19	y	0.33	11.5	23	10;13	23	y	0.44	17	22	25;9	22	y	0.51	27	26	29;25	26	y	ENSG00000162885.12	B3GALNT2	chr1	protein_coding	beta-1,3-N-acetylgalactosaminyltransferase 2
known_NIR_1107	chr1	236524740	236525968	+	236524061	236525968	A5SS	ENST00000526589.5	known	0	0	45	0	45	n	0.15	7	41	7	41	y	0	0	46	0	46	n	0	0	51	0	51	n	ENSG00000116977.18	LGALS8	chr1	protein_coding	lectin, galactoside-binding, soluble, 8
known_NIR_1108	chr1	236539089	236540564	+	236539089	236542761	A3SS	ENST00000416919.6	known	1	42	0	42	0	n	1	12	0	12	0	n	1	18	0	18	0	n	0.91	53	5	53	5	y	ENSG00000116977.18	LGALS8	chr1	protein_coding	lectin, galactoside-binding, soluble, 8
known_NIR_1109	chr1	236541710	236542761	+	236539089	236542761	A5SS	ENST00000416919.6	known	1	18	0	18	0	n	1	14	0	14	0	n	1	63	0	63	0	n	0.91	52	5	52	5	y	ENSG00000116977.18	LGALS8	chr1	protein_coding	lectin, galactoside-binding, soluble, 8
known_NIR_1110	chr1	236542787	236543560	+	236542787;236543040	236542915;236543560	ES	ENST00000527974.5	known	0.3	7	16	7	8;24	y	0.58	13	9.5	13	3;16	y	0.8	40	10	40	18;2	y	0.59	34	23.5	34	18;29	y	ENSG00000116977.18	LGALS8	chr1	protein_coding	lectin, galactoside-binding, soluble, 8
known_NIR_1111	chr1	23794325	23794552	+	23794325	23794427	A3SS	ENST00000374514.7	known	0	0	271	0	271	n	0.03	8	248	8	248	y	0.01	2	213	2	213	y	0.04	13	310	13	310	y	ENSG00000011009.10	LYPLA2	chr1	protein_coding	lysophospholipase II
known_NIR_1112	chr1	23799436	23800387	-	23799436	23800712	A5SS	ENST00000617979.4	known	0.31	100	224	100	224	y	0.25	86	265	86	265	y	0.11	20	166	20	166	y	0.04	10	225	10	225	y	ENSG00000117308.14	GALE	chr1	protein_coding	UDP-galactose-4-epimerase
known_NIR_1113	chr1	23808323	23810736	-	23808323	23816675	A5SS	ENST00000436439.6	known	0.77	43	13	43	13	y	0.89	74	9	74	9	y	0.76	59	19	59	19	y	0.92	79	7	79	7	y	ENSG00000117305.14	HMGCL	chr1	protein_coding	3-hydroxymethyl-3-methylglutaryl-CoA lyase
known_NIR_1114	chr1	23814338	23816675	-	23808323	23816675	A3SS	ENST00000436439.6	known	0.9	116	13	116	13	y	0.91	93	9	93	9	y	0.86	119	19	119	19	y	0.85	39	7	39	7	y	ENSG00000117305.14	HMGCL	chr1	protein_coding	3-hydroxymethyl-3-methylglutaryl-CoA lyase
known_NIR_1115	chr1	23959998	23960933	+	23959998	23960929	A3SS	ENST00000334351.7	known	0.02	4	209	4	209	y	0.12	28	215	28	215	y	0.08	29	355	29	355	y	0.1	32	283	32	283	y	ENSG00000189266.11	PNRC2	chr1	protein_coding	proline-rich nuclear receptor coactivator 2
known_NIR_1116	chr1	23967723	23971850	-	23967723;23971623	23971573;23971850	ES	ENST00000453840.7	known	0.39	50	79	50	101;57	y	0.1	11	96	11	98;94	y	0.21	49	183	49	182;184	y	0.42	72	100.5	72	123;78	y	ENSG00000188529.14	SRSF10	chr1	protein_coding	serine/arginine-rich splicing factor 10
known_NIR_1117	chr1	23967723	23971850	-	23967723;23971626	23971573;23971850	ES	ENST00000344989.10	known	0.25	50	152	50	101;203	y	0.07	11	141	11	98;184	y	0.15	49	280.5	49	182;379	y	0.27	72	198	72	123;273	y	ENSG00000188529.14	SRSF10	chr1	protein_coding	serine/arginine-rich splicing factor 10
known_NIR_1118	chr1	23967723	23971850	-	23971623	23971850	A3SS&ES	ENST00000374453.7	known	0.47	50	57	50	57	y	0.1	11	94	11	94	y	0.21	49	184	49	184	y	0.48	72	78	72	78	y	ENSG00000188529.14	SRSF10	chr1	protein_coding	serine/arginine-rich splicing factor 10
known_NIR_1119	chr1	23967723	23971850	-	23971626	23971850	A3SS&ES	ENST00000374452.9	known	0.2	50	203	50	203	y	0.06	11	184	11	184	y	0.11	49	379	49	379	y	0.21	72	273	72	273	y	ENSG00000188529.14	SRSF10	chr1	protein_coding	serine/arginine-rich splicing factor 10
known_NIR_1120	chr1	23967956	23971573	-	23967723	23971573	A3SS	ENST00000344989.10	known	0.26	35	101	35	101	y	0.14	16	98	16	98	y	0.17	38	182	38	182	y	0.19	28	123	28	123	y	ENSG00000188529.14	SRSF10	chr1	protein_coding	serine/arginine-rich splicing factor 10
known_NIR_1121	chr1	23971439	23971573	-	23967723	23971573	A3SS	ENST00000344989.10	known	0.63	175	101	175	101	y	0.57	129	98	129	98	y	0.69	397	182	397	182	y	0.66	238	123	238	123	y	ENSG00000188529.14	SRSF10	chr1	protein_coding	serine/arginine-rich splicing factor 10
known_NIR_1122	chr1	23971439	23971573	-	23967956	23971573	A3SS	ENST00000374452.9	known	0.83	175	35	175	35	y	0.89	129	16	129	16	y	0.91	397	38	397	38	y	0.89	238	28	238	28	y	ENSG00000188529.14	SRSF10	chr1	protein_coding	serine/arginine-rich splicing factor 10
known_NIR_1123	chr1	23971623	23971850	-	23971626	23971850	A3SS	ENST00000344989.10	known	0.22	57	203	57	203	y	0.34	94	184	94	184	y	0.33	184	379	184	379	y	0.22	78	273	78	273	y	ENSG00000188529.14	SRSF10	chr1	protein_coding	serine/arginine-rich splicing factor 10
known_NIR_1124	chr1	2400935	2402097	+	2400935	2402207	A3SS	ENST00000378513.7	known	0.03	19	710	19	710	y	0.01	4	744	4	744	y	0.01	5	715	5	715	y	0.02	15	640	15	640	y	ENSG00000157916.18	RER1	chr1	protein_coding	retention in endoplasmic reticulum sorting receptor 1
known_NIR_1125	chr1	241849027	241850409	+	241849027;241849216	241849112;241850409	ES	ENST00000366548.7	known	0.97	97	3.5	97	2;5	y	0.9	74	8	74	0;16	n	0.84	82	15.5	82	11;20	y	0.9	133	15	133	2;28	y	ENSG00000174371.16	EXO1	chr1	protein_coding	exonuclease 1
known_NIR_1126	chr1	243140107	243142286	-	243140107	243142316	A5SS	ENST00000366542.5	known	0	0	49	0	49	n	0.24	5	16	5	16	y	0.19	21	90	21	90	y	0.04	2	43	2	43	y	ENSG00000143702.15	CEP170	chr1	protein_coding	centrosomal protein 170kDa
known_NIR_1127	chr1	243140107	243142367	-	243140107	243142286	A5SS	ENST00000366543.5	known	-	-	-	-	-	-	0	0	5	0	5	n	0.43	16	21	16	21	y	0.5	2	2	2	2	n	ENSG00000143702.15	CEP170	chr1	protein_coding	centrosomal protein 170kDa
known_NIR_1128	chr1	243140107	243142367	-	243140107	243142316	A5SS	ENST00000366542.5	known	0	0	49	0	49	n	0	0	16	0	16	n	0.15	16	90	16	90	y	0.04	2	43	2	43	y	ENSG00000143702.15	CEP170	chr1	protein_coding	centrosomal protein 170kDa
known_NIR_1129	chr1	243156347	243164284	-	243156455	243164284	A3SS	ENST00000366542.5	known	0	0	18	0	18	n	0.06	5	82	5	82	y	0.05	6	116	6	116	y	0.06	3	51	3	51	y	ENSG00000143702.15	CEP170	chr1	protein_coding	centrosomal protein 170kDa
known_NIR_1130	chr1	243172846	243186259	-	243172846;243186072	243185779;243186259	ES	ENST00000366542.5	known	0.31	12	26.5	12	38;15	y	0	0	56.5	0	79;34	n	0.11	6	47	6	59;35	y	0.4	31	46.5	31	54;39	y	ENSG00000143702.15	CEP170	chr1	protein_coding	centrosomal protein 170kDa
known_NIR_1131	chr1	24453504	24454054	+	24453504	24456138	A3SS	ENST00000374399.8	known	0	0	79	0	79	n	0	0	57	0	57	n	0	0	60	0	60	n	0.09	9	95	9	95	y	ENSG00000001461.16	NIPAL3	chr1	protein_coding	NIPA-like domain containing 3
known_NIR_1132	chr1	24464120	24466004	+	24464120	24468986	A3SS	ENST00000374399.8	known	0	0	32	0	32	n	0.32	17	36	17	36	y	0.41	32	46	32	46	y	0.11	5	40	5	40	y	ENSG00000001461.16	NIPAL3	chr1	protein_coding	NIPA-like domain containing 3
known_NIR_1133	chr1	244686669	244691884	+	244686669	244689249	A3SS&ES	ENST00000302550.15	known	0.24	8	25	8	25	y	0	0	42	0	42	n	0	0	93	0	93	n	0	0	59	0	59	n	ENSG00000121644.18	DESI2	chr1	protein_coding	desumoylating isopeptidase 2
known_NIR_1134	chr1	244835756;244836520	244836485;244841944	+	244835756	244841944	cassetteExon	ENST00000411948.6	known	0	0	209	0;0	209	n	0	0	280	0;0	280	n	0	0	222	0;0	222	n	0.04	15.5	345	2;29	345	y	ENSG00000203667.9	COX20	chr1	protein_coding	COX20 cytochrome c oxidase assembly factor
known_NIR_1135	chr1	244854503	244854973	-	244848856	244854973	A3SS	ENST00000475997.5	known	1	2672	0	2672	0	n	1	2937	6	2937	6	y	1	3508	8	3508	8	y	1	3643	6	3643	6	y	ENSG00000277877.4	RP11-11N7.5	chr1	protein_coding		--
known_NIR_1136	chr1	244862730	244863617	-	244862730	244863674	A5SS	ENST00000444376.6	known	0.27	309	837	309	837	y	0.35	448	835	448	835	y	0.31	438	998	438	998	y	0.29	379	920	379	920	y	ENSG00000153187.16	HNRNPU	chr1	protein_coding	heterogeneous nuclear ribonucleoprotein U (scaffold attachment factor A)
known_NIR_1137	chr1	244970443;245002232	245002121;245017242	+	244970443	245017242	cassetteExon	ENST00000366523.5	known	0.58	27.5	20	28;27	20	y	0.37	14.5	25	7;22	25	y	0.37	15	26	13;17	26	y	0.4	19	29	18;20	29	y	ENSG00000203666.12	EFCAB2	chr1	protein_coding	EF-hand calcium binding domain 2
known_NIR_1138	chr1	24503150	24514314	+	24503117	24514314	A5SS	ENST00000436717.6	known	1	22	0	22	0	n	1	4	0	4	0	n	0.35	8	15	8	15	y	0.63	12	7	12	7	y	ENSG00000117602.11	RCAN3	chr1	protein_coding	RCAN family member 3
known_NIR_1139	chr1	245083688	245121920	+	245083688	245087245	3pMXE	ENST00000366523.5	known	0.41	34	49	34	49	y	0.13	6	40	6	40	y	0.06	6	92	6	92	y	0.06	6	102	6	102	y	ENSG00000203666.12	EFCAB2	chr1	protein_coding	EF-hand calcium binding domain 2
known_NIR_1140	chr1	246566789	246591512	+	246566663	246591512	A5SS	ENST00000366513.8	known	0	0	12	0	12	n	0.14	4	24	4	24	y	0	0	19	0	19	n	0.24	8	25	8	25	y	ENSG00000162852.13	CNST	chr1	protein_coding	consortin, connexin sorting protein
known_NIR_1141	chr1	246591941	246631894	+	246591941;246621634	246621429;246631894	ES	ENST00000366513.8	known	0	0	10.5	0	16;5	n	0	0	30.5	0	20;41	n	0	0	27.5	0	11;44	n	0.05	2	36	2	26;46	y	ENSG00000162852.13	CNST	chr1	protein_coding	consortin, connexin sorting protein
known_NIR_1142	chr1	24662804;24663224	24663183;24666815	+	24662804	24666815	cassetteExon	ENST00000323848.13	known	0.38	55	90	57;53	90	y	0.29	39.5	96	44;35	96	y	0.33	57	116	47;67	116	y	0.25	59.5	182	71;48	182	y	ENSG00000133226.16	SRRM1	chr1	protein_coding	serine/arginine repetitive matrix 1
known_NIR_1143	chr1	246988255;246996181	246996021;246999348	-	246988255	246999348	cassetteExon	ENST00000487338.6	known	0.17	3.5	17	4;3	17	y	0.05	2	40	0;4	40	n	0.05	2	37	4;0	37	n	0.1	2.5	23	5;0	23	n	ENSG00000197472.14	ZNF695	chr1	protein_coding	zinc finger protein 695
known_NIR_1144	chr1	246999440	246999948	-	246999440	246999912	A5SS	ENST00000487338.6	known	0.41	37	54	37	54	y	0.24	12	38	12	38	y	0.5	18	18	18	18	y	0.59	37	26	37	26	y	ENSG00000197472.14	ZNF695	chr1	protein_coding	zinc finger protein 695
known_NIR_1145	chr1	247102113	247103939	-	247102113	247104197	A5SS	ENST00000448299.6	known	0.08	5	55	5	55	y	0	0	45	0	45	n	0.11	8	62	8	62	y	0.1	4	35	4	35	y	ENSG00000188295.14	ZNF669	chr1	protein_coding	zinc finger protein 669
known_NIR_1146	chr1	247157217	247159006	-	247123871	247159006	A3SS	ENST00000472531.5	known	-	-	-	-	-	-	0.45	5	6	5	6	y	1	7	0	7	0	n	0.55	6	5	6	5	y	ENSG00000196418.12	ZNF124	chr1	protein_coding	zinc finger protein 124
known_NIR_1147	chr1	247157403	247159006	-	247123871	247159006	A3SS	ENST00000472531.5	known	-	-	-	-	-	-	0.57	8	6	8	6	y	1	6	0	6	0	n	0.64	9	5	9	5	y	ENSG00000196418.12	ZNF124	chr1	protein_coding	zinc finger protein 124
known_NIR_1148	chr1	247157403	247159006	-	247157217	247159006	A3SS	ENST00000340684.10	known	-	-	-	-	-	-	0.62	8	5	8	5	y	0.46	6	7	6	7	y	0.6	9	6	9	6	y	ENSG00000196418.12	ZNF124	chr1	protein_coding	zinc finger protein 124
known_NIR_1149	chr1	248855946	248856514	-	248855946;248856422	248856288;248856514	ES	ENST00000306601.8	known	0.16	12	64.5	12	77;52	y	0.05	4	76.5	4	112;41	y	0	0	109	0	93;125	n	0.17	19	94.5	19	88;101	y	ENSG00000171163.15	ZNF692	chr1	protein_coding	zinc finger protein 692
known_NIR_1150	chr1	248858321	248858512	-	248858321	248858918	A5SS	ENST00000306601.8	known	0.29	9	22	9	22	y	0	0	21	0	21	n	0	0	10	0	10	n	0	0	20	0	20	n	ENSG00000171163.15	ZNF692	chr1	protein_coding	zinc finger protein 692
known_NIR_1151	chr1	248913879	248916602	+	248913879	248917279	A3SS	ENST00000355360.8	known	1	2	0	2	0	n	1	6	0	6	0	n	1	28	0	28	0	n	0.79	23	6	23	6	y	ENSG00000185220.11	PGBD2	chr1	protein_coding	piggyBac transposable element derived 2
known_NIR_1152	chr1	25228235	25232104	-	25228235;25229123	25228998;25232104	ES	ENST00000236273.8	known	0	0	174	0	159;189	n	0	0	218	0	177;259	n	0.05	16	280	16	265;295	y	0.03	11	338.5	11	346;331	y	ENSG00000117614.9	SYF2	chr1	protein_coding	SYF2 pre-mRNA-splicing factor
known_NIR_1153	chr1	2560714	2561673	+	2560714	2561494	A3SS	ENST00000409119.5	known	1	30	0	30	0	n	0.79	11	3	11	3	y	-	-	-	-	-	-	0.9	18	2	18	2	y	ENSG00000157873.17	TNFRSF14	chr1	protein_coding	tumor necrosis factor receptor superfamily, member 14
known_NIR_1154	chr1	25801160;25802117	25802016;25805142	+	25801160	25805142	cassetteExon	ENST00000354177.8	known	0	0	50	0;0	50	n	0.08	5	60	7;3	60	y	0	0	51	0;0	51	n	0.1	9	81	7;11	81	y	ENSG00000162430.16	SEPN1	chr1	protein_coding	selenoprotein N, 1
known_NIR_1155	chr1	25821003	25823019	+	25820029	25823019	A5SS	ENST00000374303.6	known	0	0	69	0	69	n	0	0	31	0	31	n	0	0	97	0	97	n	0.05	3	58	3	58	y	ENSG00000117640.17	MTFR1L	chr1	protein_coding	mitochondrial fission regulator 1-like
known_NIR_1156	chr1	25823128	25823621	+	25823128	25823644	A3SS	ENST00000527604.1	known	0.01	2	159	2	159	y	0	0	77	0	77	n	0	0	108	0	108	n	0	0	130	0	130	n	ENSG00000255054.3	RP1-317E23.6	chr1	protein_coding		--
known_NIR_1157	chr1	25826826	25829545	+	25826826	25829509	A3SS	ENST00000374303.6	known	0	0	55	0	55	n	0.18	8	36	8	36	y	0.05	4	72	4	72	y	0.02	2	83	2	83	y	ENSG00000117640.17	MTFR1L	chr1	protein_coding	mitochondrial fission regulator 1-like
known_NIR_1158	chr1	25826826	25829545	+	25826826	25829618	A3SS	ENST00000474295.5	known	0	0	4	0	4	n	0.24	8	26	8	26	y	0.67	4	2	4	2	n	1	2	0	2	0	n	ENSG00000117640.17	MTFR1L	chr1	protein_coding	mitochondrial fission regulator 1-like
known_NIR_1159	chr1	25826826	25829618	+	25826826	25829509	A3SS	ENST00000374303.6	known	0.07	4	55	4	55	y	0.42	26	36	26	36	y	0.03	2	72	2	72	y	0	0	83	0	83	n	ENSG00000117640.17	MTFR1L	chr1	protein_coding	mitochondrial fission regulator 1-like
known_NIR_1160	chr1	2588453	2588954	+	2588453	2588550	A3SS&ES	ENST00000444521.6	known	0	0	42	0	42	n	0.16	10	53	10	53	y	0	0	33	0	33	n	0.03	2	61	2	61	y	ENSG00000157870.14	FAM213B	chr1	protein_coding	family with sequence similarity 213, member B
known_NIR_1161	chr1	2588453;2588625	2588550;2588954	+	2588453	2588954	cassetteExon	ENST00000378425.9	known	1	40.5	0	42;39	0	n	0.78	36.5	10	53;20	10	y	1	23	0	33;13	0	n	0.96	46.5	2	61;32	2	y	ENSG00000157870.14	FAM213B	chr1	protein_coding	family with sequence similarity 213, member B
known_NIR_1162	chr1	2588625	2588954	+	2588625	2588922	A3SS	ENST00000444521.6	known	0.45	39	48	39	48	y	0.71	20	8	20	8	y	0.45	13	16	13	16	y	0.62	32	20	32	20	y	ENSG00000157870.14	FAM213B	chr1	protein_coding	family with sequence similarity 213, member B
known_NIR_1163	chr1	25904738	25905852	-	25904738	25906389	A5SS	ENST00000426559.6	known	0	0	615	0	615	n	0	0	739	0	739	n	0	0	710	0	710	n	0.13	116	777	116	777	y	ENSG00000117632.20	STMN1	chr1	protein_coding	stathmin 1
known_NIR_1164	chr1	25904738	25906788	-	25904738	25906389	5pMXE	ENST00000426559.6	known	0	0	615	0	615	n	0	0	739	0	739	n	0.1	78	710	78	710	y	0	0	777	0	777	n	ENSG00000117632.20	STMN1	chr1	protein_coding	stathmin 1
known_NIR_1165	chr1	26111915	26114292	+	26111420	26114292	A5SS	ENST00000619836.4	known	-	-	-	-	-	-	1	6	0	6	0	n	0.38	6	10	6	10	y	1	7	0	7	0	n	ENSG00000175087.9	PDIK1L	chr1	protein_coding	PDLIM1 interacting kinase 1 like
known_NIR_1166	chr1	26183435	26183729	+	26183414	26183729	A5SS	ENST00000361530.10	known	0.8	24	6	24	6	y	0.19	4	17	4	17	y	0.41	16	23	16	23	y	0.2	5	20	5	20	y	ENSG00000142675.17	CNKSR1	chr1	protein_coding	connector enhancer of kinase suppressor of Ras 1
known_NIR_1167	chr1	26239838;26244318	26244166;26255171	+	26239838	26255171	cassetteExon	ENST00000451429.6	known	0.85	76	13	71;81	13	y	0.96	53.5	2	46;61	2	y	1	79	0	77;81	0	n	0.95	124	6	167;81	6	y	ENSG00000130695.13	CEP85	chr1	protein_coding	centrosomal protein 85kDa
known_NIR_1168	chr1	26286037;26294331	26294205;26296919	-	26286037	26296919	cassetteExon	ENST00000374223.5	known	0.88	78	11	37;119	11	y	0.9	154	18	142;166	18	y	0.92	134	12	138;130	12	y	0.72	106	42	96;116	42	y	ENSG00000158062.20	UBXN11	chr1	protein_coding	UBX domain protein 11
known_NIR_1169	chr1	26298062	26301694	-	26301024	26301694	A3SS&ES	ENST00000314675.11	known	0.73	61	22	61	22	y	0.62	85	53	85	53	y	0.59	55	39	55	39	y	0.62	55	33	55	33	y	ENSG00000158062.20	UBXN11	chr1	protein_coding	UBX domain protein 11
known_NIR_1170	chr1	26298062;26301024	26300926;26301694	-	26298062	26301694	cassetteExon	ENST00000374223.5	known	0.45	50	61	78;22	61	y	0.43	65	85	77;53	85	y	0.4	36.5	55	34;39	55	y	0.45	45.5	55	58;33	55	y	ENSG00000158062.20	UBXN11	chr1	protein_coding	UBX domain protein 11
known_NIR_1171	chr1	26301722	26306592	-	26301722;26302918	26302813;26306592	ES	ENST00000314675.11	known	0.22	13	46.5	13	65;28	y	0	0	85	0	130;40	n	0.03	2	75.5	2	113;38	y	0.09	7	69	7	95;43	y	ENSG00000158062.20	UBXN11	chr1	protein_coding	UBX domain protein 11
known_NIR_1172	chr1	26301722;26303167	26302813;26306592	-	26301722	26306592	cassetteExon	ENST00000374223.5	known	0.74	37	13	65;9	13	y	1	65	0	130;0	0	n	0.97	56.5	2	113;0	2	n	0.88	50.5	7	95;6	7	y	ENSG00000158062.20	UBXN11	chr1	protein_coding	UBX domain protein 11
known_NIR_1173	chr1	26302918;26303167	26303043;26306592	-	26302918	26306592	cassetteExon	ENST00000314675.11	known	0.67	56.5	28	104;9	28	y	0.39	25.5	40	51;0	40	n	0.39	24	38	48;0	38	n	0.39	27	43	48;6	43	y	ENSG00000158062.20	UBXN11	chr1	protein_coding	UBX domain protein 11
known_NIR_1174	chr1	26442873	26447559	+	26442873;26446432	26446316;26447559	ES	ENST00000427245.6	known	0	0	80.5	0	67;94	n	0.07	10	125	10	129;121	y	0.08	8	96	8	68;124	y	0.15	14	78	14	102;54	y	ENSG00000117682.16	DHDDS	chr1	protein_coding	dehydrodolichyl diphosphate synthase
known_NIR_1175	chr1	26442873;26447660	26447559;26457791	+	26442873;26446432	26446316;26457791	MXE	ENST00000525682.6	known	0.37	21.5	36	0;43	67;5	n	0.38	42	68.5	10;74	129;8	y	0.53	46	40.5	8;84	68;13	y	0.37	35.5	61	14;57	102;20	y	ENSG00000117682.16	DHDDS	chr1	protein_coding	dehydrodolichyl diphosphate synthase
known_NIR_1176	chr1	26446432	26457791	+	26446432	26447559	3pMXE	ENST00000374185.7	known	0.05	5	94	5	94	y	0.06	8	121	8	121	y	0.09	13	124	13	124	y	0.27	20	54	20	54	y	ENSG00000117682.16	DHDDS	chr1	protein_coding	dehydrodolichyl diphosphate synthase
known_NIR_1177	chr1	26446432;26447660	26447559;26457791	+	26446432	26457791	cassetteExon	ENST00000525682.6	known	0.93	68.5	5	94;43	5	y	0.92	97.5	8	121;74	8	y	0.89	104	13	124;84	13	y	0.74	55.5	20	54;57	20	y	ENSG00000117682.16	DHDDS	chr1	protein_coding	dehydrodolichyl diphosphate synthase
known_NIR_1178	chr1	26447660	26457791	+	26447660	26448356	3pMXE	ENST00000427245.6	known	0.75	43	14	43	14	y	1	74	0	74	0	n	0.94	84	5	84	5	y	1	57	0	57	0	n	ENSG00000117682.16	DHDDS	chr1	protein_coding	dehydrodolichyl diphosphate synthase
known_NIR_1179	chr1	26460144	26468892	+	26460144	26468895	A3SS	ENST00000525682.6	known	0.18	10	45	10	45	y	0.18	24	113	24	113	y	0.12	10	72	10	72	y	0.36	33	58	33	58	y	ENSG00000117682.16	DHDDS	chr1	protein_coding	dehydrodolichyl diphosphate synthase
known_NIR_1180	chr1	26531438	26536925	+	26529983	26536925	A5SS	ENST00000374168.6	known	0	0	138	0	138	n	0	0	150	0	150	n	0.12	14	105	14	105	y	0.07	11	142	11	142	y	ENSG00000117676.13	RPS6KA1	chr1	protein_coding	ribosomal protein S6 kinase, 90kDa, polypeptide 1
known_NIR_1181	chr1	26554738	26555184	+	26554738	26555151	A3SS	ENST00000374168.6	known	0	0	206	0	206	n	0	0	212	0	212	n	0	0	184	0	184	n	0.01	3	244	3	244	y	ENSG00000117676.13	RPS6KA1	chr1	protein_coding	ribosomal protein S6 kinase, 90kDa, polypeptide 1
known_NIR_1182	chr1	26773898	26774980	+	26773898	26774329	A3SS	ENST00000324856.11	known	0	0	46	0	46	n	0	0	38	0	38	n	0	0	67	0	67	n	0.11	6	50	6	50	y	ENSG00000117713.17	ARID1A	chr1	protein_coding	AT rich interactive domain 1A (SWI-like)
known_NIR_1183	chr1	26788819	26790759	+	26788268	26790759	A5SS	ENST00000078527.8	known	0.32	9	19	9	19	y	0.43	6	8	6	8	y	0	0	21	0	21	n	0.29	9	22	9	22	y	ENSG00000060642.10	PIGV	chr1	protein_coding	phosphatidylinositol glycan anchor biosynthesis, class V
known_NIR_1184	chr1	26886133	26886477	-	26886133	26888969	A5SS	ENST00000374135.8	known	0	0	106	0	106	n	0	0	140	0	140	n	0.12	15	112	15	112	y	0.1	14	133	14	133	y	ENSG00000142751.14	GPN2	chr1	protein_coding	GPN-loop GTPase 2
known_NIR_1185	chr1	27296401	27297051	+	27296401	27297048	A3SS	ENST00000319394.7	known	0	0	93	0	93	n	0	0	64	0	64	n	0	0	66	0	66	n	0.19	15	63	15	63	y	ENSG00000142784.15	WDTC1	chr1	protein_coding	WD and tetratricopeptide repeats 1
known_NIR_1186	chr1	27332101	27332447	+	27332101	27333958	A3SS	ENST00000611517.4	known	0.03	6	174	6	174	y	0	0	198	0	198	n	0	0	178	0	178	n	0	0	197	0	197	n	ENSG00000186501.14	TMEM222	chr1	protein_coding	transmembrane protein 222
known_NIR_1187	chr1	27364394;27364684	27364661;27364773	-	27364394	27364773	cassetteExon	ENST00000374040.7	known	0.23	5.5	18	6;5	18	y	0.69	18	8	24;12	8	y	0.51	10.5	10	14;7	10	y	1	19.5	0	26;13	0	n	ENSG00000142733.14	MAP3K6	chr1	protein_coding	mitogen-activated protein kinase kinase kinase 6
known_NIR_1188	chr1	27408346	27409692	-	27408346	27412572	A5SS	ENST00000536657.1	known	1	402	0	402	0	n	0.89	259	32	259	32	y	1	263	0	263	0	n	1	320	1	320	1	n	ENSG00000158195.10	WASF2	chr1	protein_coding	WAS protein family, member 2
known_NIR_1189	chr1	27408346	27412572	-	27408346;27410206	27409692;27412572	ES	ENST00000618852.4	known	0	0	494	0	402;586	n	0.1	32	296.5	32	259;334	y	0	0	354.5	0	263;446	n	0	1	460.5	1	320;601	n	ENSG00000158195.10	WASF2	chr1	protein_coding	WAS protein family, member 2
known_NIR_1190	chr1	27410206	27412572	-	27408346	27412572	A3SS	ENST00000536657.1	known	1	586	0	586	0	n	0.91	334	32	334	32	y	1	446	0	446	0	n	1	601	1	601	1	n	ENSG00000158195.10	WASF2	chr1	protein_coding	WAS protein family, member 2
known_NIR_1191	chr1	27558530	27558706	-	27553185	27558706	A3SS	ENST00000247087.9	known	0.93	40	3	40	3	y	1	21	0	21	0	n	0.79	54	14	54	14	y	0.71	37	15	37	15	y	ENSG00000126705.13	AHDC1	chr1	protein_coding	AT hook, DNA binding motif, containing 1
known_NIR_1192	chr1	27668535	27669221	-	27668535	27669245	A5SS	ENST00000361157.10	known	0	0	35	0	35	n	0.1	8	70	8	70	y	0.11	5	39	5	39	y	0.24	20	62	20	62	y	ENSG00000126709.14	IFI6	chr1	protein_coding	interferon, alpha-inducible protein 6
known_NIR_1193	chr1	27668535	27669233	-	27668535	27669221	A5SS	ENST00000339145.8	known	1	6	0	6	0	n	0.6	12	8	12	8	y	0.5	5	5	5	5	y	0.39	13	20	13	20	y	ENSG00000126709.14	IFI6	chr1	protein_coding	interferon, alpha-inducible protein 6
known_NIR_1194	chr1	27668535	27669233	-	27668535	27669245	A5SS	ENST00000361157.10	known	0.15	6	35	6	35	y	0.15	12	70	12	70	y	0.11	5	39	5	39	y	0.17	13	62	13	62	y	ENSG00000126709.14	IFI6	chr1	protein_coding	interferon, alpha-inducible protein 6
known_NIR_1195	chr1	27744811	27755195	+	27744811;27749154	27749068;27755195	ES	ENST00000373954.10	known	-	-	-	-	-	-	0.3	4	9.5	4	13;6	y	0.44	27	34.5	27	29;40	y	0.35	8	15	8	16;14	y	ENSG00000009780.15	FAM76A	chr1	protein_coding	family with sequence similarity 76, member A
known_NIR_1196	chr1	27831246	27832756	+	27830891	27832756	A5SS	ENST00000311772.9	known	0.05	6	121	6	121	y	0	0	133	0	133	n	0.01	2	134	2	134	y	0.02	4	201	4	201	y	ENSG00000117751.17	PPP1R8	chr1	protein_coding	protein phosphatase 1, regulatory subunit 8
known_NIR_1197	chr1	27831246	27832756	+	27831366	27832756	A5SS	ENST00000236412.11	known	1	6	0	6	0	n	0	0	15	0	15	n	0.12	2	14	2	14	y	0.4	4	6	4	6	y	ENSG00000117751.17	PPP1R8	chr1	protein_coding	protein phosphatase 1, regulatory subunit 8
known_NIR_1198	chr1	27831366	27832756	+	27830891	27832756	A5SS	ENST00000311772.9	known	0	0	121	0	121	n	0.1	15	133	15	133	y	0.09	14	134	14	134	y	0.03	6	201	6	201	y	ENSG00000117751.17	PPP1R8	chr1	protein_coding	protein phosphatase 1, regulatory subunit 8
known_NIR_1199	chr1	28017239	28035544	-	28017239;28027926	28027789;28035544	ES	ENST00000373871.7	known	0.43	6	8	6	5;11	y	1	19	0	19	0;0	n	0.5	23	23	23	28;18	y	0.78	32	9	32	5;13	y	ENSG00000158161.15	EYA3	chr1	protein_coding	EYA transcriptional coactivator and phosphatase 3
known_NIR_1200	chr1	28038905	28048383	-	28038905;28042650	28042571;28048383	ES	ENST00000373871.7	known	0	0	21	0	20;22	n	0.33	5	10	5	14;6	y	0.17	7	34.5	7	28;41	y	0.27	18	49.5	18	34;65	y	ENSG00000158161.15	EYA3	chr1	protein_coding	EYA transcriptional coactivator and phosphatase 3
known_NIR_1201	chr1	28236452	28246589	+	28236452	28237837	3pMXE	ENST00000335514.9	known	0	0	1551	0	1551	n	0	0	1700	0	1700	n	0	0	1732	0	1732	n	0.03	47	1558	47	1558	y	ENSG00000130770.17	ATPIF1	chr1	protein_coding	ATPase inhibitory factor 1
known_NIR_1202	chr1	28438430	28459085	+	28407463	28459085	A5SS	ENST00000373839.7	known	0.76	29	9	29	9	y	1	10	0	10	0	n	0.4	26	39	26	39	y	0.54	34	29	34	29	y	ENSG00000204138.12	PHACTR4	chr1	protein_coding	phosphatase and actin regulator 4
known_NIR_1203	chr1	28516867	28529858	+	28508905	28529858	A5SS	ENST00000398958.6	known	0.59	13	9	13	9	y	0.75	55	18	55	18	y	0.87	80	12	80	12	y	0.55	41	34	41	34	y	ENSG00000180198.15	RCC1	chr1	protein_coding	regulator of chromosome condensation 1
known_NIR_1204	chr1	28518308	28529858	+	28508905	28529858	A5SS	ENST00000398958.6	known	0.97	349	9	349	9	y	0.95	366	18	366	18	y	0.96	308	12	308	12	y	0.9	321	34	321	34	y	ENSG00000180198.15	RCC1	chr1	protein_coding	regulator of chromosome condensation 1
known_NIR_1205	chr1	28518308	28529858	+	28516867	28529858	A5SS	ENST00000373833.10	known	0.96	349	13	349	13	y	0.87	366	55	366	55	y	0.79	308	80	308	80	y	0.89	321	41	321	41	y	ENSG00000180198.15	RCC1	chr1	protein_coding	regulator of chromosome condensation 1
known_NIR_1206	chr1	28529939;28530615	28530523;28531803	+	28529939	28531803	cassetteExon	ENST00000398958.6	known	0.11	73	563	137;9	563	y	0.09	73	710	128;18	710	y	0.07	60	781	105;15	781	y	0.08	60.5	670	121;0	670	n	ENSG00000180198.15	RCC1	chr1	protein_coding	regulator of chromosome condensation 1
known_NIR_1207	chr1	28579587	28579912	-	28579587	28579942	A5SS	ENST00000475441.5	known	0.79	61	16	61	16	y	0.71	67	28	67	28	y	0.64	34	19	34	19	y	0.58	42	30	42	30	y	ENSG00000197989.13	SNHG12	chr1	antisense	small nucleolar RNA host gene 12
known_NIR_1208	chr1	28580646	28581094	-	28580646	28581111	A5SS	ENST00000475441.5	known	0.04	2	44	2	44	y	0.06	6	89	6	89	y	0.13	17	111	17	111	y	0.06	7	120	7	120	y	ENSG00000197989.13	SNHG12	chr1	antisense	small nucleolar RNA host gene 12
known_NIR_1209	chr1	28622165	28642655	-	28622165	28642992	A5SS	ENST00000373824.8	known	0.09	14	136	14	136	y	0.13	15	100	15	100	y	0.06	4	65	4	65	y	0.02	3	127	3	127	y	ENSG00000120656.11	TAF12	chr1	protein_coding	TAF12 RNA polymerase II, TATA box binding protein (TBP)-associated factor, 20kDa
known_NIR_1210	chr1	28668839	28683586	+	28668839	28683583	A3SS	ENST00000373816.5	known	0	0	8	0	8	n	0.25	6	18	6	18	y	0.63	12	7	12	7	y	0	0	14	0	14	n	ENSG00000162419.12	GMEB1	chr1	protein_coding	glucocorticoid modulatory element binding protein 1
known_NIR_1211	chr1	28683740	28690074	+	28683740	28690104	A3SS	ENST00000373816.5	known	0.16	6	32	6	32	y	0.4	23	35	23	35	y	0.07	2	28	2	28	y	0.29	17	41	17	41	y	ENSG00000162419.12	GMEB1	chr1	protein_coding	glucocorticoid modulatory element binding protein 1
known_NIR_1212	chr1	28737147	28738259	+	28737147;28737682	28737658;28738259	ES	ENST00000542507.5	known	0.03	6	195.5	6	189;202	y	0	0	135.5	0	135;136	n	0	0	192	0	173;211	n	0	0	185	0	165;205	n	ENSG00000198492.14	YTHDF2	chr1	protein_coding	YTH N(6)-methyladenosine RNA binding protein 2
known_NIR_1213	chr1	28914768	28987431	+	28893837	28987431	A5SS	ENST00000373798.5	known	1	16	0	16	0	n	1	4	0	4	0	n	1	15	0	15	0	n	0.7	7	3	7	3	y	ENSG00000159023.18	EPB41	chr1	protein_coding	erythrocyte membrane protein band 4.1
known_NIR_1214	chr1	29053312	29058589	+	29053312	29064982	A3SS	ENST00000347529.7	known	1	10	0	10	0	n	0	0	3	0	3	n	0.15	4	22	4	22	y	0.21	9	33	9	33	y	ENSG00000159023.18	EPB41	chr1	protein_coding	erythrocyte membrane protein band 4.1
known_NIR_1215	chr1	29053312	29064982	+	29053312;29060484	29060422;29064982	ES	ENST00000356093.6	known	0	0	9.5	0	11;8	n	0.06	3	46	3	29;63	y	0.28	22	57	22	50;64	y	0.41	33	47	33	29;65	y	ENSG00000159023.18	EPB41	chr1	protein_coding	erythrocyte membrane protein band 4.1
known_NIR_1216	chr1	29053312;29058645	29058589;29060422	+	29053312	29060422	cassetteExon	ENST00000356093.6	known	0.42	8	11	10;6	11	y	0	0	29	0;0	29	n	0.04	2	50	4;0	50	n	0.16	5.5	29	9;2	29	y	ENSG00000159023.18	EPB41	chr1	protein_coding	erythrocyte membrane protein band 4.1
known_NIR_1217	chr1	29097935	29112368	+	29097935;29109437	29109336;29112368	ES	ENST00000343067.8	known	0	0	15	0	10;20	n	0	0	27.5	0	41;14	n	0.17	12	59.5	12	52;67	y	0.03	3	116.5	3	121;112	y	ENSG00000159023.18	EPB41	chr1	protein_coding	erythrocyte membrane protein band 4.1
known_NIR_1218	chr1	29121848	29122364	-	29121848	29123856	A5SS	ENST00000521452.1	known	1	4	0	4	0	n	0.86	12	2	12	2	y	1	12	0	12	0	n	1	4	0	4	0	n	ENSG00000253304.1	TMEM200B	chr1	protein_coding	transmembrane protein 200B
known_NIR_1219	chr1	29216685	29230731	-	29216812	29230731	A3SS	ENST00000373791.7	known	0.71	52	21	52	21	y	0.79	69	18	69	18	y	1	45	0	45	0	n	0.91	51	5	51	5	y	ENSG00000116353.15	MECR	chr1	protein_coding	mitochondrial trans-2-enoyl-CoA reductase
known_NIR_1220	chr1	29311544	29311643	+	29311553	29311643	A5SS	ENST00000345512.7	known	0.35	21	39	21	39	y	0.36	10	18	10	18	y	0.4	6	9	6	9	y	0.65	28	15	28	15	y	ENSG00000060656.19	PTPRU	chr1	protein_coding	protein tyrosine phosphatase, receptor type, U
known_NIR_1221	chr1	30945483	30950127	-	30945483	30950133	A5SS	ENST00000424085.6	known	0.71	72	29	72	29	y	0.14	12	71	12	71	y	0.71	63	26	63	26	y	0.53	123	110	123	110	y	ENSG00000134644.15	PUM1	chr1	protein_coding	pumilio RNA-binding family member 1
known_NIR_1222	chr1	30966197	30967167	-	30966278	30967167	A3SS	ENST00000424085.6	known	0.39	34	54	34	54	y	0.24	21	65	21	65	y	0.12	7	52	7	52	y	0.23	35	119	35	119	y	ENSG00000134644.15	PUM1	chr1	protein_coding	pumilio RNA-binding family member 1
known_NIR_1223	chr1	30980166	30981312	-	30980163	30981312	A3SS	ENST00000424085.6	known	0.61	61	39	61	39	y	0.25	17	51	17	51	y	0.36	38	69	38	69	y	0.37	52	88	52	88	y	ENSG00000134644.15	PUM1	chr1	protein_coding	pumilio RNA-binding family member 1
known_NIR_1224	chr1	30981405	30992390	-	30981405	31028796	A5SS	ENST00000424085.6	known	0.97	87	3	87	3	y	0.96	54	2	54	2	y	0.89	58	7	58	7	y	0.86	94	15	94	15	y	ENSG00000134644.15	PUM1	chr1	protein_coding	pumilio RNA-binding family member 1
known_NIR_1225	chr1	30995220	31005853	-	30995220	31028796	A5SS	ENST00000373742.6	known	1	67	0	67	0	n	0.96	51	2	51	2	y	0.86	106	17	106	17	y	0.91	229	22	229	22	y	ENSG00000134644.15	PUM1	chr1	protein_coding	pumilio RNA-binding family member 1
known_NIR_1226	chr1	30995220	31028796	-	30981405	31028796	A3SS	ENST00000424085.6	known	0	0	3	0	3	n	0.5	2	2	2	2	n	0.71	17	7	17	7	y	0.59	22	15	22	15	y	ENSG00000134644.15	PUM1	chr1	protein_coding	pumilio RNA-binding family member 1
known_NIR_1227	chr1	31007102	31028796	-	30981405	31028796	A3SS	ENST00000424085.6	known	0.97	105	3	105	3	y	0.97	56	2	56	2	y	0.95	126	7	126	7	y	0.91	146	15	146	15	y	ENSG00000134644.15	PUM1	chr1	protein_coding	pumilio RNA-binding family member 1
known_NIR_1228	chr1	31007102	31028796	-	30995220	31028796	A3SS	ENST00000373742.6	known	1	105	0	105	0	n	0.97	56	2	56	2	y	0.88	126	17	126	17	y	0.87	146	22	146	22	y	ENSG00000134644.15	PUM1	chr1	protein_coding	pumilio RNA-binding family member 1
known_NIR_1229	chr1	31297213	31310044	+	31297075	31310044	A5SS	ENST00000618216.4	known	0.11	27	222	27	222	y	0.09	10	107	10	107	y	0.14	16	98	16	98	y	0.07	16	202	16	202	y	ENSG00000121766.14	ZCCHC17	chr1	protein_coding	zinc finger, CCHC domain containing 17
known_NIR_1230	chr1	31310164;31318236	31318167;31319109	+	31310164	31319109	cassetteExon	ENST00000618216.4	known	0.07	29	359	26;32	359	y	0.03	8	262	9;7	262	y	0.08	19.5	226	15;24	226	y	0.07	25	351	30;20	351	y	ENSG00000121766.14	ZCCHC17	chr1	protein_coding	zinc finger, CCHC domain containing 17
known_NIR_1231	chr1	31319166	31338957	+	31319166;31337275	31337175;31338957	ES	ENST00000618216.4	known	0.05	13	260.5	13	333;188	y	0	0	213.5	0	263;164	n	0	0	278	0	281;275	n	0	0	280	0	356;204	n	ENSG00000121766.14	ZCCHC17	chr1	protein_coding	zinc finger, CCHC domain containing 17
known_NIR_1232	chr1	31339048	31364032	+	31339048;31346740	31346640;31364032	ES	ENST00000618216.4	known	0	0	146.5	0	293;0	n	0.07	10	130.5	10	252;9	y	0	0	170	0	333;7	n	0.07	7	93	7	185;1	n	ENSG00000121766.14	ZCCHC17	chr1	protein_coding	zinc finger, CCHC domain containing 17
known_NIR_1233	chr1	31346740	31364032	+	31348974	31364032	A5SS&ES	ENST00000627541.1	known	0	0	220	0	220	n	0.04	9	227	9	227	y	0.03	7	240	7	240	y	0	1	270	1	270	n	ENSG00000121766.14	ZCCHC17	chr1	protein_coding	zinc finger, CCHC domain containing 17
known_NIR_1234	chr1	31346740;31348974	31348829;31364032	+	31346740	31364032	cassetteExon	ENST00000618216.4	known	1	269.5	0	319;220	0	n	0.96	245	9	263;227	9	y	0.97	266	7	292;240	7	y	1	268.5	1	267;270	1	n	ENSG00000121766.14	ZCCHC17	chr1	protein_coding	zinc finger, CCHC domain containing 17
known_NIR_1235	chr1	31348974	31364032	+	31339048	31364032	A5SS	ENST00000616859.4	known	1	220	0	220	0	n	0.96	227	10	227	10	y	1	240	0	240	0	n	0.97	270	7	270	7	y	ENSG00000121766.14	ZCCHC17	chr1	protein_coding	zinc finger, CCHC domain containing 17
known_NIR_1236	chr1	31413304	31423693	+	31410435	31423693	A5SS	ENST00000373710.5	known	0.95	143	8	143	8	y	0.96	161	7	161	7	y	0.87	141	21	141	21	y	0.99	134	1	134	1	n	ENSG00000168528.11	SERINC2	chr1	protein_coding	serine incorporator 2
known_NIR_1237	chr1	31414064	31423693	+	31410435	31423693	A5SS	ENST00000373710.5	known	0.72	21	8	21	8	y	0.82	32	7	32	7	y	0.38	13	21	13	21	y	0.91	10	1	10	1	n	ENSG00000168528.11	SERINC2	chr1	protein_coding	serine incorporator 2
known_NIR_1238	chr1	31414064	31423693	+	31413304	31423693	A5SS	ENST00000373709.7	known	0.13	21	143	21	143	y	0.17	32	161	32	161	y	0.08	13	141	13	141	y	0.07	10	134	10	134	y	ENSG00000168528.11	SERINC2	chr1	protein_coding	serine incorporator 2
known_NIR_1239	chr1	31679685	31680042	-	31679685;31679851	31679804;31680042	ES	ENST00000373672.7	known	0	0	8.5	0	11;6	n	0.62	18	11	18	13;9	y	1	11	0	11	0;0	n	0.96	13	0.5	13	0;1	n	ENSG00000084636.17	COL16A1	chr1	protein_coding	collagen, type XVI, alpha 1
known_NIR_1240	chr1	31727605	31728182	-	31727605;31728081	31728025;31728182	ES	ENST00000398556.7	known	0.95	47	2.5	47	5;0	n	0.65	11	6	11	8;4	y	1	20	0	20	0;0	n	0.36	6	10.5	6	9;12	y	ENSG00000121753.12	ADGRB2	chr1	protein_coding	adhesion G protein-coupled receptor B2
known_NIR_1241	chr1	31728277	31728598	-	31728280	31728598	A3SS	ENST00000398556.7	known	0.15	2	11	2	11	y	-	-	-	-	-	-	0.54	7	6	7	6	y	0.09	1	10	1	10	n	ENSG00000121753.12	ADGRB2	chr1	protein_coding	adhesion G protein-coupled receptor B2
known_NIR_1242	chr1	31742217;31744357	31744193;31744648	-	31742217;31743002	31742838;31744648	MXE	ENST00000398556.7	known	0.62	5	3	10;0	6;0	n	1	2	0	0;4	0;0	n	1	15.5	0	19;12	0;0	n	0.72	9	3.5	5;13	4;3	y	ENSG00000121753.12	ADGRB2	chr1	protein_coding	adhesion G protein-coupled receptor B2
known_NIR_1243	chr1	31911826	31918970	-	31911826;31915987	31915895;31918970	ES	ENST00000602725.5	known	0.16	103	560	103	548;572	y	0.16	119	634.5	119	675;594	y	0.13	131	894.5	131	945;844	y	0.08	80	941.5	80	983;900	y	ENSG00000184007.17	PTP4A2	chr1	protein_coding	protein tyrosine phosphatase type IVA, member 2
known_NIR_1244	chr1	31913023	31915895	-	31911826	31915895	A3SS	ENST00000602725.5	known	0.02	11	548	11	548	y	0	0	675	0	675	n	0	4	945	4	945	y	0.02	22	983	22	983	y	ENSG00000184007.17	PTP4A2	chr1	protein_coding	protein tyrosine phosphatase type IVA, member 2
known_NIR_1245	chr1	32030422	32033188	+	32030422;32031640	32031524;32033188	ES	ENST00000327300.11	known	0.06	35	587.5	35	487;688	y	0.05	29	550	29	491;609	y	0.04	24	655.5	24	587;724	y	0.05	44	771	44	678;864	y	ENSG00000121774.17	KHDRBS1	chr1	protein_coding	KH domain containing, RNA binding, signal transduction associated 1
known_NIR_1246	chr1	32381268	32383830	-	32381268	32394080	A5SS	ENST00000526031.5	known	1	126	0	126	0	n	1	93	0	93	0	n	1	78	0	78	0	n	0.96	66	3	66	3	y	ENSG00000160058.18	BSDC1	chr1	protein_coding	BSD domain containing 1
known_NIR_1247	chr1	32381268	32386779	-	32381268;32383997	32383830;32386779	ES	ENST00000455895.6	known	0.05	6	120	6	126;114	y	0.11	13	110	13	93;127	y	0	0	73	0	78;68	n	0.08	11	130.5	11	66;195	y	ENSG00000160058.18	BSDC1	chr1	protein_coding	BSD domain containing 1
known_NIR_1248	chr1	32381268	32386779	-	32381268;32384048	32383830;32386779	ES	ENST00000341071.11	known	0.09	6	63	6	126;0	n	0.18	13	61	13	93;29	y	0	0	39	0	78;0	n	0.23	11	36.5	11	66;7	y	ENSG00000160058.18	BSDC1	chr1	protein_coding	BSD domain containing 1
known_NIR_1249	chr1	32381268;32386895	32386779;32394080	-	32381268	32394080	cassetteExon	ENST00000526031.5	known	1	64.5	0	6;123	0	n	1	72	0	13;131	0	n	1	36.5	0	0;73	0	n	0.97	98	3	11;185	3	y	ENSG00000160058.18	BSDC1	chr1	protein_coding	BSD domain containing 1
known_NIR_1250	chr1	32384048	32386779	-	32383997	32386779	A3SS	ENST00000455895.6	known	0	0	114	0	114	n	0.19	29	127	29	127	y	0	0	68	0	68	n	0.03	7	195	7	195	y	ENSG00000160058.18	BSDC1	chr1	protein_coding	BSD domain containing 1
known_NIR_1251	chr1	32595223	32600268	+	32595223	32600087	A3SS	ENST00000480336.1	known	0	0	15	0	15	n	-	-	-	-	-	-	0.57	4	3	4	3	n	0.38	13	21	13	21	y	ENSG00000254553.1	RP1-27O5.3	chr1	protein_coding		--
known_NIR_1252	chr1	32634072	32634702	-	32634072	32634768	A5SS	ENST00000468695.5	known	0.14	29	173	29	173	y	0.09	10	96	10	96	y	0.1	12	109	12	109	y	0.11	20	170	20	170	y	ENSG00000176261.15	ZBTB8OS	chr1	protein_coding	zinc finger and BTB domain containing 8 opposite strand
known_NIR_1253	chr1	32634792	32650433	-	32600350	32650433	A3SS	ENST00000341885.5	known	1	268	0	268	0	n	1	124	0	124	0	n	1	174	0	174	0	n	0.99	221	3	221	3	y	ENSG00000176261.15	ZBTB8OS	chr1	protein_coding	zinc finger and BTB domain containing 8 opposite strand
known_NIR_1254	chr1	32651322	32651914	+	32651322	32651917	A3SS	ENST00000414241.7	known	0.85	269	48	269	48	y	0.96	331	15	331	15	y	1	358	0	358	0	n	0.97	464	14	464	14	y	ENSG00000162521.18	RBBP4	chr1	protein_coding	retinoblastoma binding protein 4
known_NIR_1255	chr1	32672901	32680526	+	32672901	32679640	3pMXE	ENST00000414241.7	known	0	0	301	0	301	n	0	0	446	0	446	n	0.06	39	647	39	647	y	0.06	36	599	36	599	y	ENSG00000162521.18	RBBP4	chr1	protein_coding	retinoblastoma binding protein 4
known_NIR_1256	chr1	32681860	32684258	-	32681860;32684089	32684010;32684258	ES	ENST00000409190.7	known	0.92	39	3.5	39	7;0	n	0.48	6	6.5	6	4;9	y	0.77	57	17.5	57	22;13	y	0.7	48	20.5	48	25;16	y	ENSG00000162520.14	SYNC	chr1	protein_coding	syncoilin, intermediate filament protein
known_NIR_1257	chr1	32768775	32769673	+	32768775	32772865	A3SS	ENST00000294521.7	known	0.94	153	9	153	9	y	1	147	0	147	0	n	1	117	0	117	0	n	1	227	0	227	0	n	ENSG00000162522.10	KIAA1522	chr1	protein_coding	KIAA1522
known_NIR_1258	chr1	32772441	32772865	+	32768775	32772865	A5SS	ENST00000294521.7	known	0.95	188	9	188	9	y	1	177	0	177	0	n	1	163	0	163	0	n	1	230	0	230	0	n	ENSG00000162522.10	KIAA1522	chr1	protein_coding	KIAA1522
known_NIR_1259	chr1	32937309	32938397	-	32937259	32938397	A3SS	ENST00000373456.11	known	0.34	37	72	37	72	y	0.2	29	116	29	116	y	0.23	46	153	46	153	y	0.24	52	168	52	168	y	ENSG00000116514.16	RNF19B	chr1	protein_coding	ring finger protein 19B
known_NIR_1260	chr1	32948363	32949569	-	32948366	32949569	A3SS	ENST00000373456.11	known	0.47	43	49	43	49	y	0.78	127	35	127	35	y	0.81	116	28	116	28	y	0.77	124	38	124	38	y	ENSG00000116514.16	RNF19B	chr1	protein_coding	ring finger protein 19B
known_NIR_1261	chr1	33010833;33012122	33012074;33013207	-	33010833	33013207	cassetteExon	ENST00000629371.2	known	0.03	26	804	14;38	804	y	0.03	32	1080	23;41	1080	y	0.07	53.5	751	40;67	751	y	0.03	29.5	841	26;33	841	y	ENSG00000004455.16	AK2	chr1	protein_coding	adenylate kinase 2
known_NIR_1262	chr1	33014594;33021461	33021367;33021593	-	33014594	33021593	cassetteExon	ENST00000629371.2	known	0.96	1760	67	1959;1561	67	y	0.95	1904	109	2135;1673	109	y	0.96	1857.5	80	2136;1579	80	y	0.94	1786	111	1997;1575	111	y	ENSG00000004455.16	AK2	chr1	protein_coding	adenylate kinase 2
known_NIR_1263	chr1	33020161	33021367	-	33014594	33021367	A3SS	ENST00000373449.6	known	0.05	109	1959	109	1959	y	0.02	46	2135	46	2135	y	0.02	45	2136	45	2136	y	0.02	47	1997	47	1997	y	ENSG00000004455.16	AK2	chr1	protein_coding	adenylate kinase 2
known_NIR_1264	chr1	33021703	33036736	-	33021703;33024567	33024442;33036736	ES	ENST00000629371.2	known	0.01	22	2146	22	1797;2495	y	0.01	16	2413.5	16	2178;2649	y	0	9	2499.5	9	2253;2746	y	0.01	25	2328.5	25	2095;2562	y	ENSG00000004455.16	AK2	chr1	protein_coding	adenylate kinase 2
known_NIR_1265	chr1	33031661	33036736	-	33021703	33036736	A3SS	ENST00000548033.5	known	0.64	39	22	39	22	y	0.75	47	16	47	16	y	0.72	23	9	23	9	y	0.64	44	25	44	25	y	ENSG00000004455.16	AK2	chr1	protein_coding	adenylate kinase 2
known_NIR_1266	chr1	33031661	33036736	-	33024567	33036736	A3SS	ENST00000629371.2	known	0.02	39	2495	39	2495	y	0.02	47	2649	47	2649	y	0.01	23	2746	23	2746	y	0.02	44	2562	44	2562	y	ENSG00000004455.16	AK2	chr1	protein_coding	adenylate kinase 2
known_NIR_1267	chr1	33098179	33101833	+	33098179	33117902	A3SS	ENST00000294517.10	known	-	-	-	-	-	-	-	-	-	-	-	-	0.5	6	6	6	6	y	0	0	15	0	15	n	ENSG00000142920.16	AZIN2	chr1	protein_coding	antizyme inhibitor 2
known_NIR_1268	chr1	33334292	33349597	-	33334292	33354401	A5SS	ENST00000431992.5	known	1	159	0	159	0	n	1	204	0	204	0	n	1	160	0	160	0	n	0.96	162	7	162	7	y	ENSG00000134686.16	PHC2	chr1	protein_coding	polyhomeotic homolog 2 (Drosophila)
known_NIR_1269	chr1	33367428;33368622	33368536;33370421	-	33367428	33370421	cassetteExon	ENST00000431992.5	known	1	9	0	6;12	0	n	1	7	0	5;9	0	n	0.77	13.5	4	10;17	4	y	1	1	0	0;2	0	n	ENSG00000134686.16	PHC2	chr1	protein_coding	polyhomeotic homolog 2 (Drosophila)
known_NIR_1270	chr1	33488651;33489602	33489115;33491025	+	33488651	33491025	cassetteExon	ENST00000373413.2	known	-	-	-	-	-	-	1	1.5	0	0;3	0	n	0.08	0.5	6	0;1	6	n	0.35	6.5	12	8;5	12	y	ENSG00000121903.14	ZSCAN20	chr1	protein_coding	zinc finger and SCAN domain containing 20
known_NIR_1271	chr1	34782442	34784738	+	34781778	34784738	A5SS	ENST00000373366.2	known	0.12	22	155	22	155	y	0.15	24	137	24	137	y	0.1	12	106	12	106	y	0.2	26	107	26	107	y	ENSG00000188910.7	GJB3	chr1	protein_coding	gap junction protein, beta 3, 31kDa
known_NIR_1272	chr1	34855982	34859455	-	34855982	34859677	A5SS	ENST00000521580.2	known	0.15	20	113	20	113	y	0.24	23	73	23	73	y	0.22	30	104	30	104	y	0.23	22	74	22	74	y	ENSG00000163866.8	SMIM12	chr1	protein_coding	small integral membrane protein 12
known_NIR_1273	chr1	3494124	3494371	-	3493797	3494371	A3SS	ENST00000294599.8	known	1	16	0	16	0	n	1	34	0	34	0	n	1	31	0	31	0	n	0.75	33	11	33	11	y	ENSG00000162591.15	MEGF6	chr1	protein_coding	multiple EGF-like-domains 6
known_NIR_1274	chr1	3498499	3498698	-	3498499	3499588	A5SS	ENST00000294599.8	known	1	51	0	51	0	n	0.66	23	12	23	12	y	0.61	25	16	25	16	y	0.89	33	4	33	4	y	ENSG00000162591.15	MEGF6	chr1	protein_coding	multiple EGF-like-domains 6
known_NIR_1275	chr1	3499266	3499588	-	3498499	3499588	A3SS	ENST00000294599.8	known	1	14	0	14	0	n	0	0	12	0	12	n	0.6	24	16	24	16	y	0.73	11	4	11	4	y	ENSG00000162591.15	MEGF6	chr1	protein_coding	multiple EGF-like-domains 6
known_NIR_1276	chr1	35030713	35031267	-	35030713	35031815	A5SS	ENST00000357182.8	known	0	0	8	0	8	n	-	-	-	-	-	-	0	0	36	0	36	n	0.25	4	12	4	12	y	ENSG00000163867.16	ZMYM6	chr1	protein_coding	zinc finger, MYM-type 6
known_NIR_1277	chr1	35030713	35031815	-	35030713	35031631	5pMXE	ENST00000487874.1	known	0.32	8	17	8	17	y	0	0	10	0	10	n	1	36	0	36	0	n	1	12	0	12	0	n	ENSG00000271741.1	RP11-244H3.4	chr1	protein_coding		--
known_NIR_1278	chr1	35557883	35559107	+	35558223	35559107	A5SS	ENST00000373243.6	known	0	0	144	0	144	n	0	0	77	0	77	n	0	0	116	0	116	n	0.02	3	120	3	120	y	ENSG00000020129.15	NCDN	chr1	protein_coding	neurochondrin
known_NIR_1279	chr1	35557883;35558223	35558156;35559107	+	35557883	35559107	cassetteExon	ENST00000373253.7	known	1	114.5	0	85;144	0	n	1	54.5	0	32;77	0	n	1	84	0	52;116	0	n	0.97	90	3	60;120	3	y	ENSG00000020129.15	NCDN	chr1	protein_coding	neurochondrin
known_NIR_1280	chr1	35736606	35736914	-	35720980	35736914	A3SS	ENST00000251195.9	known	0.5	17	17	17	17	y	1	18	0	18	0	n	0.61	54	34	54	34	y	1	85	0	85	0	n	ENSG00000092853.13	CLSPN	chr1	protein_coding	claspin
known_NIR_1281	chr1	35749652	35751250	-	35749811	35751250	A3SS	ENST00000251195.9	known	0	0	26	0	26	n	0	0	28	0	28	n	0	0	59	0	59	n	0.08	5	61	5	61	y	ENSG00000092853.13	CLSPN	chr1	protein_coding	claspin
known_NIR_1282	chr1	35751506	35760342	-	35751506;35753936	35753745;35760342	ES	ENST00000251195.9	known	0	0	24.5	0	39;10	n	0.11	5	41.5	5	46;37	y	0	0	39	0	6;72	n	0.05	3	56.5	3	71;42	y	ENSG00000092853.13	CLSPN	chr1	protein_coding	claspin
known_NIR_1283	chr1	35973511	36004341	+	35973511	35982621	3pMXE	ENST00000324350.9	known	1	19	0	19	0	n	1	9	0	9	0	n	0.76	29	9	29	9	y	1	34	0	34	0	n	ENSG00000126070.18	AGO3	chr1	protein_coding	argonaute RISC catalytic component 3
known_NIR_1284	chr1	36137978	36138084	-	36137978	36149337	A5SS	ENST00000616074.4	known	-	-	-	-	-	-	0.37	7	12	7	12	y	0	0	5	0	5	n	0	0	10	0	10	n	ENSG00000054116.11	TRAPPC3	chr1	protein_coding	trafficking protein particle complex 3
known_NIR_1285	chr1	36137978	36149337	-	36137978	36139720	A5SS&ES	ENST00000617904.4	known	0	0	230	0	230	n	0.03	12	369	12	369	y	0.01	5	331	5	331	y	0.02	10	425	10	425	y	ENSG00000054116.11	TRAPPC3	chr1	protein_coding	trafficking protein particle complex 3
known_NIR_1286	chr1	36137978;36138232	36138084;36139720	-	36137978	36139720	cassetteExon	ENST00000616395.4	known	0	0	230	0;0	230	n	0.04	14	369	7;21	369	y	0	0	331	0;0	331	n	0	0	425	0;0	425	n	ENSG00000054116.11	TRAPPC3	chr1	protein_coding	trafficking protein particle complex 3
known_NIR_1287	chr1	36137978;36140166	36139720;36149337	-	36137978	36149337	cassetteExon	ENST00000616074.4	known	1	176.5	0	230;123	0	n	0.96	258.5	12	369;148	12	y	0.98	236	5	331;141	5	y	0.97	317.5	10	425;210	10	y	ENSG00000054116.11	TRAPPC3	chr1	protein_coding	trafficking protein particle complex 3
known_NIR_1288	chr1	36139819	36140069	-	36139843	36140069	A3SS	ENST00000616395.4	known	0.91	157	15	157	15	y	0.96	277	12	277	12	y	0.98	239	4	239	4	y	0.99	292	4	292	4	y	ENSG00000054116.11	TRAPPC3	chr1	protein_coding	trafficking protein particle complex 3
known_NIR_1289	chr1	36140166	36149092	-	36140166	36149337	A5SS	ENST00000616395.4	known	0.24	38	123	38	123	y	0.15	27	148	27	148	y	0.22	40	141	40	141	y	0.14	35	210	35	210	y	ENSG00000054116.11	TRAPPC3	chr1	protein_coding	trafficking protein particle complex 3
known_NIR_1290	chr1	36173478;36175008	36174898;36176199	+	36173478	36176199	cassetteExon	ENST00000316156.8	known	0.56	197.5	158	258;137	158	y	0.61	203.5	129	271;136	129	y	0.57	114	87	169;59	87	y	0.41	147	215	191;103	215	y	ENSG00000116871.15	MAP7D1	chr1	protein_coding	MAP7 domain containing 1
known_NIR_1291	chr1	36179315	36179512	+	36179315	36179515	A3SS	ENST00000316156.8	known	0.12	74	543	74	543	y	0.07	29	381	29	381	y	0.18	72	325	72	325	y	0.08	44	497	44	497	y	ENSG00000116871.15	MAP7D1	chr1	protein_coding	MAP7 domain containing 1
known_NIR_1292	chr1	36224505;36225102	36224971;36259382	+	36224505	36259382	cassetteExon	ENST00000354618.9	known	0.13	18.5	124	0;37	124	n	0	0	72	0;0	72	n	0.09	9.5	101	7;12	101	y	0	0	164	0;0	164	n	ENSG00000054118.13	THRAP3	chr1	protein_coding	thyroid hormone receptor associated protein 3
known_NIR_1293	chr1	36358837	36361221	-	36358822	36361221	A3SS	ENST00000359297.6	known	0.02	2	93	2	93	y	0	0	88	0	88	n	0	0	82	0	82	n	0	0	80	0	80	n	ENSG00000196182.10	STK40	chr1	protein_coding	serine/threonine kinase 40
known_NIR_1294	chr1	36361340	36385723	-	36361340;36368084	36367848;36385723	ES	ENST00000373129.7	known	0.89	74	9.5	74	0;19	n	0.81	44	10	44	0;20	n	0.71	41	16.5	41	10;23	y	0.87	58	8.5	58	6;11	y	ENSG00000196182.10	STK40	chr1	protein_coding	serine/threonine kinase 40
known_NIR_1295	chr1	36428475	36431802	-	36423466	36431802	A3SS	ENST00000235532.9	known	0.55	17	14	17	14	y	0	0	12	0	12	n	0	0	14	0	14	n	0.2	1	4	1	4	n	ENSG00000116885.18	OSCP1	chr1	protein_coding	organic solute carrier partner 1
known_NIR_1296	chr1	36438910;36444033	36444004;36450258	-	36438910	36450258	cassetteExon	ENST00000235532.9	known	0	0	15	0;0	15	n	0.35	9	17	12;6	17	y	-	-	-	-	-	-	0	0	4	0;0	4	n	ENSG00000116885.18	OSCP1	chr1	protein_coding	organic solute carrier partner 1
known_NIR_1297	chr1	3690944	3707549	+	3683180	3707549	A5SS	ENST00000378295.8	known	0.5	5	5	5	5	y	-	-	-	-	-	-	0	0	2	0	2	n	0	0	4	0	4	n	ENSG00000078900.14	TP73	chr1	protein_coding	tumor protein p73
known_NIR_1298	chr1	3731065	3732747	+	3731065;3731556	3731463;3732747	ES	ENST00000378295.8	known	0.52	13	12	13	14;10	y	0	0	8	0	12;4	n	-	-	-	-	-	-	0	0	9	0	6;12	n	ENSG00000078900.14	TP73	chr1	protein_coding	tumor protein p73
known_NIR_1299	chr1	37493814	37501804	-	37495918	37501804	A3SS&ES	ENST00000296214.9	known	0.06	16	244	16	244	y	0.07	22	289	22	289	y	0.11	23	193	23	193	y	0.09	25	244	25	244	y	ENSG00000163875.15	MEAF6	chr1	protein_coding	MYST/Esa1-associated factor 6
known_NIR_1300	chr1	37795846	37799567	+	37795846	37796744	A3SS&ES	ENST00000397631.7	known	0.15	17	99	17	99	y	0.1	5	43	5	43	y	0	0	77	0	77	n	0.21	22	83	22	83	y	ENSG00000185090.14	MANEAL	chr1	protein_coding	mannosidase, endo-alpha-like
known_NIR_1301	chr1	37795846	37799567	+	37795846;37796820	37796744;37799567	ES	ENST00000373045.10	known	0.19	17	71.5	17	99;44	y	0.1	5	45	5	43;47	y	0	0	61.5	0	77;46	n	0.24	22	69	22	83;55	y	ENSG00000185090.14	MANEAL	chr1	protein_coding	mannosidase, endo-alpha-like
known_NIR_1302	chr1	37796820	37799844	+	37796820	37799567	A3SS	ENST00000373045.10	known	0.45	36	44	36	44	y	0.18	10	47	10	47	y	0.43	35	46	35	46	y	0.25	18	55	18	55	y	ENSG00000185090.14	MANEAL	chr1	protein_coding	mannosidase, endo-alpha-like
known_NIR_1303	chr1	37808439	37808531	+	37808306	37808531	A5SS	ENST00000468084.1	known	0.02	4	161	4	161	y	0.07	10	143	10	143	y	0.05	5	91	5	91	y	0.12	13	99	13	99	y	ENSG00000197982.13	C1orf122	chr1	protein_coding	chromosome 1 open reading frame 122
known_NIR_1304	chr1	37891454	37931913	-	37891454	37931673	5pMXE	ENST00000373027.5	known	0.58	7	5	7	5	y	0.23	10	34	10	34	y	0.89	24	3	24	3	y	0.69	35	16	35	16	y	ENSG00000204084.12	INPP5B	chr1	protein_coding	inositol polyphosphate-5-phosphatase, 75kDa
known_NIR_1305	chr1	38866999	38873018	-	38867610	38873018	A3SS&ES	ENST00000622355.1	known	0.11	20	166	20	166	y	0.04	12	262	12	262	y	0.02	5	230	5	230	y	0.04	13	353	13	353	y	ENSG00000273637.1	RP5-864K19.7	chr1	processed_transcript		--
known_NIR_1306	chr1	38998311	39003347	+	38998311;39001106	39000972;39003347	ES	ENST00000432648.7	known	0	0	198.5	0	278;119	n	0.09	16	160	16	160;160	y	0.07	15	202.5	15	211;194	y	0.04	11	238	11	260;216	y	ENSG00000174574.15	AKIRIN1	chr1	protein_coding	akirin 1
known_NIR_1307	chr1	39026398	39028723	+	39026402	39028723	A5SS	ENST00000372969.7	known	0.64	1645	928	1645	928	y	0.68	1692	812	1692	812	y	0.64	1586	908	1586	908	y	0.6	1450	983	1450	983	y	ENSG00000168653.10	NDUFS5	chr1	protein_coding	NADH dehydrogenase (ubiquinone) Fe-S protein 5, 15kDa (NADH-coenzyme Q reductase)
known_NIR_1308	chr1	39327353	39331203	+	39327353	39349478	A3SS	ENST00000361689.6	known	0.28	15	38	15	38	y	0	0	31	0	31	n	0.06	2	29	2	29	y	0.12	6	46	6	46	y	ENSG00000127603.23	MACF1	chr1	protein_coding	microtubule-actin crosslinking factor 1
known_NIR_1309	chr1	39347210	39349478	+	39327353	39349478	A5SS	ENST00000361689.6	known	0.07	3	38	3	38	y	0	0	31	0	31	n	0	0	29	0	29	n	0.12	6	46	6	46	y	ENSG00000127603.23	MACF1	chr1	protein_coding	microtubule-actin crosslinking factor 1
known_NIR_1310	chr1	39463686	39468615	+	39463686;39465112	39465095;39468615	ES	ENST00000567887.5	known	0.49	52	54	52	60;48	y	0.56	56	44.5	56	51;38	y	0.47	93	103.5	93	102;105	y	0.45	82	100.5	82	102;99	y	ENSG00000127603.23	MACF1	chr1	protein_coding	microtubule-actin crosslinking factor 1
known_NIR_1311	chr1	39480009	39484601	+	39480009;39481030	39480920;39484601	ES	ENST00000567887.5	known	0.67	138	69.5	138	69;70	y	0.73	153	56.5	153	51;62	y	0.65	123	65.5	123	55;76	y	0.74	210	72.5	210	74;71	y	ENSG00000127603.23	MACF1	chr1	protein_coding	microtubule-actin crosslinking factor 1
known_NIR_1312	chr1	39522505	39529055	-	39522505	39523562	A5SS&ES	ENST00000458207.5	known	-	-	-	-	-	-	-	-	-	-	-	-	0.4	6	9	6	9	y	1	3	0	3	0	n	ENSG00000182109.7	RP11-69E11.4	chr1	antisense		--
known_NIR_1313	chr1	39563741	39564423	-	39563741	39563836	A5SS&ES	ENST00000372857.7	known	0	0	304	0	304	n	0.22	78	281	78	281	y	0.09	34	351	34	351	y	0.08	44	513	44	513	y	ENSG00000090621.13	PABPC4	chr1	protein_coding	poly(A) binding protein, cytoplasmic 4 (inducible form)
known_NIR_1314	chr1	39563741	39564423	-	39563741	39564471	A5SS	ENST00000372862.7	known	0	0	8	0	8	n	0.88	78	11	78	11	y	0.94	34	2	34	2	y	0.73	44	16	44	16	y	ENSG00000090621.13	PABPC4	chr1	protein_coding	poly(A) binding protein, cytoplasmic 4 (inducible form)
known_NIR_1315	chr1	39563741	39564423	-	39563741;39563922	39563836;39564423	ES	ENST00000372858.7	known	0	0	263	0	304;222	n	0.25	78	229	78	281;177	y	0.11	34	272	34	351;193	y	0.1	44	398.5	44	513;284	y	ENSG00000090621.13	PABPC4	chr1	protein_coding	poly(A) binding protein, cytoplasmic 4 (inducible form)
known_NIR_1316	chr1	39563741	39564471	-	39563741	39563836	A5SS&ES	ENST00000372858.7	known	0.03	8	304	8	304	y	0.04	11	281	11	281	y	0.01	2	351	2	351	y	0.03	16	513	16	513	y	ENSG00000090621.13	PABPC4	chr1	protein_coding	poly(A) binding protein, cytoplasmic 4 (inducible form)
known_NIR_1317	chr1	39563741;39563922	39563836;39564471	-	39563741	39564471	cassetteExon	ENST00000372862.7	known	0.96	215.5	8	304;127	8	y	0.95	197.5	11	281;114	11	y	0.99	259	2	351;167	2	y	0.96	360.5	16	513;208	16	y	ENSG00000090621.13	PABPC4	chr1	protein_coding	poly(A) binding protein, cytoplasmic 4 (inducible form)
known_NIR_1318	chr1	39563922	39564471	-	39563922	39564423	A5SS	ENST00000372858.7	known	0.36	127	222	127	222	y	0.39	114	177	114	177	y	0.46	167	193	167	193	y	0.42	208	284	208	284	y	ENSG00000090621.13	PABPC4	chr1	protein_coding	poly(A) binding protein, cytoplasmic 4 (inducible form)
known_NIR_1319	chr1	39743924	39748903	+	39743924;39745498	39745375;39748903	ES	ENST00000324379.9	known	0.01	3	351	3	420;282	y	0.01	4	465.5	4	541;390	y	0	0	412.5	0	425;400	n	0.04	16	390.5	16	391;390	y	ENSG00000084072.16	PPIE	chr1	protein_coding	peptidylprolyl isomerase E (cyclophilin E)
known_NIR_1320	chr1	39753052	39762517	+	39753052	39753287	3pMXE	ENST00000324379.9	known	0.02	11	455	11	455	y	0.03	11	409	11	409	y	0.02	6	251	6	251	y	0.04	13	335	13	335	y	ENSG00000084072.16	PPIE	chr1	protein_coding	peptidylprolyl isomerase E (cyclophilin E)
known_NIR_1321	chr1	39753052	39763689	+	39753052	39753287	3pMXE	ENST00000324379.9	known	0.09	43	455	43	455	y	0.01	5	409	5	409	y	0.01	2	251	2	251	y	0.02	8	335	8	335	y	ENSG00000084072.16	PPIE	chr1	protein_coding	peptidylprolyl isomerase E (cyclophilin E)
known_NIR_1322	chr1	39753052;39762651	39762517;39763689	+	39753052	39763689	cassetteExon	ENST00000356511.6	known	0.11	5.5	43	11;0	43	n	0.52	5.5	5	11;0	5	n	0.6	3	2	6;0	2	n	0.52	8.5	8	13;4	8	y	ENSG00000084072.16	PPIE	chr1	protein_coding	peptidylprolyl isomerase E (cyclophilin E)
known_NIR_1323	chr1	39844640	39847220	-	39844640	39883318	A5SS	ENST00000541099.5	known	0.94	101	6	101	6	y	1	153	0	153	0	n	0.98	164	4	164	4	y	1	231	0	231	0	n	ENSG00000043514.15	TRIT1	chr1	protein_coding	tRNA isopentenyltransferase 1
known_NIR_1324	chr1	39847297;39847660	39847548;39847986	-	39847297	39847986	cassetteExon	ENST00000537440.5	known	1	69	0	97;41	0	n	1	103	0	121;85	0	n	0.9	122.5	13	139;106	13	y	0.94	121	8	157;85	8	y	ENSG00000043514.15	TRIT1	chr1	protein_coding	tRNA isopentenyltransferase 1
known_NIR_1325	chr1	39852876	39853970	-	39852876	39883318	A5SS	ENST00000441669.6	known	0.89	65	8	65	8	y	1	107	0	107	0	n	0.7	68	29	68	29	y	0.85	35	6	35	6	y	ENSG00000043514.15	TRIT1	chr1	protein_coding	tRNA isopentenyltransferase 1
known_NIR_1326	chr1	39852876	39883318	-	39844640	39883318	A3SS	ENST00000541099.5	known	0.57	8	6	8	6	y	-	-	-	-	-	-	0.88	29	4	29	4	y	1	6	0	6	0	n	ENSG00000043514.15	TRIT1	chr1	protein_coding	tRNA isopentenyltransferase 1
known_NIR_1327	chr1	39857417	39883318	-	39844640	39883318	A3SS	ENST00000541099.5	known	0.94	91	6	91	6	y	1	54	0	54	0	n	0.93	51	4	51	4	y	1	64	0	64	0	n	ENSG00000043514.15	TRIT1	chr1	protein_coding	tRNA isopentenyltransferase 1
known_NIR_1328	chr1	39857417	39883318	-	39852876	39883318	A3SS	ENST00000441669.6	known	0.92	91	8	91	8	y	1	54	0	54	0	n	0.64	51	29	51	29	y	0.91	64	6	64	6	y	ENSG00000043514.15	TRIT1	chr1	protein_coding	tRNA isopentenyltransferase 1
known_NIR_1329	chr1	40040783	40059334	+	40040783	40059337	A3SS	ENST00000372797.7	known	0.16	38	202	38	202	y	0.21	35	130	35	130	y	0.15	34	193	34	193	y	0.25	74	222	74	222	y	ENSG00000131236.16	CAP1	chr1	protein_coding	CAP, adenylate cyclase-associated protein 1 (yeast)
known_NIR_1330	chr1	40040801	40059334	+	40040783	40059334	A5SS	ENST00000372802.5	known	0.81	164	38	164	38	y	0.84	187	35	187	35	y	0.83	169	34	169	34	y	0.73	197	74	197	74	y	ENSG00000131236.16	CAP1	chr1	protein_coding	CAP, adenylate cyclase-associated protein 1 (yeast)
known_NIR_1331	chr1	40040801	40059337	+	40040783	40059337	A5SS	ENST00000372797.7	known	0.7	469	202	469	202	y	0.78	467	130	467	130	y	0.74	542	193	542	193	y	0.71	552	222	552	222	y	ENSG00000131236.16	CAP1	chr1	protein_coding	CAP, adenylate cyclase-associated protein 1 (yeast)
known_NIR_1332	chr1	40040801	40059337	+	40040801	40059334	A3SS	ENST00000372792.6	known	0.74	469	164	469	164	y	0.71	467	187	467	187	y	0.76	542	169	542	169	y	0.74	552	197	552	197	y	ENSG00000131236.16	CAP1	chr1	protein_coding	CAP, adenylate cyclase-associated protein 1 (yeast)
known_NIR_1333	chr1	40059458	40060070	+	40059458	40060067	A3SS	ENST00000372797.7	known	0.11	223	1741	223	1741	y	0.09	180	1731	180	1731	y	0.11	248	1921	248	1921	y	0.12	291	2051	291	2051	y	ENSG00000131236.16	CAP1	chr1	protein_coding	CAP, adenylate cyclase-associated protein 1 (yeast)
known_NIR_1334	chr1	40089512	40091329	-	40089512	40097115	A5SS	ENST00000449045.6	known	1	497	0	497	0	n	0.98	553	11	553	11	y	1	720	0	720	0	n	1	778	0	778	0	n	ENSG00000131238.16	PPT1	chr1	protein_coding	palmitoyl-protein thioesterase 1
known_NIR_1335	chr1	40092507	40097115	-	40089512	40097115	A3SS	ENST00000449045.6	known	1	341	0	341	0	n	0.97	426	11	426	11	y	1	388	0	388	0	n	1	430	0	430	0	n	ENSG00000131238.16	PPT1	chr1	protein_coding	palmitoyl-protein thioesterase 1
known_NIR_1336	chr1	40451088;40454288	40454203;40456945	+	40451088	40456945	cassetteExon	ENST00000484445.5	known	1	1	0	2;0	0	n	0.41	3.5	5	0;7	5	n	0.61	9.5	6	5;14	6	y	1	20.5	0	13;28	0	n	ENSG00000187801.14	ZFP69B	chr1	protein_coding	ZFP69 zinc finger protein B
known_NIR_1337	chr1	40477894	40479333	+	40477894	40479036	A3SS	ENST00000372706.5	known	-	-	-	-	-	-	-	-	-	-	-	-	0.5	9	9	9	9	y	0	0	5	0	5	n	ENSG00000187815.9	ZFP69	chr1	protein_coding	ZFP69 zinc finger protein
known_NIR_1338	chr1	40541710	40544397	+	40541710	40546562	A3SS	ENST00000372699.7	known	1	50	0	50	0	n	1	25	0	25	0	n	0.51	19	18	19	18	y	0.9	18	2	18	2	y	ENSG00000117010.15	ZNF684	chr1	protein_coding	zinc finger protein 684
known_NIR_1339	chr1	40723792	40738836	+	40691867	40738836	A5SS	ENST00000620728.4	known	0	0	193	0	193	n	0	0	188	0	188	n	0	0	108	0	108	n	0.03	6	232	6	232	y	ENSG00000066136.19	NFYC	chr1	protein_coding	nuclear transcription factor Y, gamma
known_NIR_1340	chr1	40758294	40762990	+	40758294	40762888	A3SS	ENST00000620728.4	known	0.09	18	189	18	189	y	0.04	6	142	6	142	y	0.13	23	156	23	156	y	0	0	162	0	162	n	ENSG00000066136.19	NFYC	chr1	protein_coding	nuclear transcription factor Y, gamma
known_NIR_1341	chr1	40766703;40766974	40766918;40769356	+	40766703	40769356	cassetteExon	ENST00000620728.4	known	0.06	14	212	0;28	212	n	0.08	10	117	9;11	117	y	0.03	5	163	5;5	163	y	0.21	39	146	30;48	146	y	ENSG00000066136.19	NFYC	chr1	protein_coding	nuclear transcription factor Y, gamma
known_NIR_1342	chr1	40769415	40770397	+	40769415	40770709	A3SS	ENST00000620728.4	known	0.17	44	214	44	214	y	0.01	1	189	1	189	n	0.07	14	174	14	174	y	0.19	45	186	45	186	y	ENSG00000066136.19	NFYC	chr1	protein_coding	nuclear transcription factor Y, gamma
known_NIR_1343	chr1	40769415	40770397	+	40769415	40770712	A3SS	ENST00000456393.6	known	0.79	44	12	44	12	y	0.04	1	22	1	22	n	1	14	0	14	0	n	0.88	45	6	45	6	y	ENSG00000066136.19	NFYC	chr1	protein_coding	nuclear transcription factor Y, gamma
known_NIR_1344	chr1	40769415	40770712	+	40769415	40770709	A3SS	ENST00000620728.4	known	0.05	12	214	12	214	y	0.1	22	189	22	189	y	0	0	174	0	174	n	0.03	6	186	6	186	y	ENSG00000066136.19	NFYC	chr1	protein_coding	nuclear transcription factor Y, gamma
known_NIR_1345	chr1	41028726	41037362	-	41028726;41034048	41033983;41037362	ES	ENST00000397174.6	known	0.31	8	17.5	8	15;20	y	0.44	19	24	19	31;17	y	0	0	7	0	13;1	n	0.54	22	19	22	23;15	y	ENSG00000010803.16	SCMH1	chr1	protein_coding	sex comb on midleg homolog 1 (Drosophila)
known_NIR_1346	chr1	41075451	41113283	-	41075451	41142878	A5SS	ENST00000456518.3	known	1	17	0	17	0	n	1	48	0	48	0	n	1	35	0	35	0	n	0.9	37	4	37	4	y	ENSG00000010803.16	SCMH1	chr1	protein_coding	sex comb on midleg homolog 1 (Drosophila)
known_NIR_1347	chr1	41117010	41142878	-	41075451	41142878	A3SS	ENST00000456518.3	known	1	32	0	32	0	n	1	31	0	31	0	n	1	28	0	28	0	n	0.9	36	4	36	4	y	ENSG00000010803.16	SCMH1	chr1	protein_coding	sex comb on midleg homolog 1 (Drosophila)
known_NIR_1348	chr1	41143112	41159725	-	41143112;41151684	41151614;41159725	ES	ENST00000402904.6	known	0.16	2	10.5	2	21;0	n	0	0	4.5	0	9;0	n	0.79	25	6.5	25	13;0	n	0.4	9	13.5	9	25;2	y	ENSG00000010803.16	SCMH1	chr1	protein_coding	sex comb on midleg homolog 1 (Drosophila)
known_NIR_1349	chr1	41143112	41160875	-	41143112	41159725	5pMXE	ENST00000456518.3	known	0.83	10	2	10	2	y	-	-	-	-	-	-	0	0	25	0	25	n	0.57	12	9	12	9	y	ENSG00000010803.16	SCMH1	chr1	protein_coding	sex comb on midleg homolog 1 (Drosophila)
known_NIR_1350	chr1	41143112;41151684	41151614;41160875	-	41143112	41160875	cassetteExon	ENST00000361191.9	known	0.62	16	10	21;11	10	y	1	7.5	0	9;6	0	n	1	8	0	13;3	0	n	0.64	21.5	12	25;18	12	y	ENSG00000010803.16	SCMH1	chr1	protein_coding	sex comb on midleg homolog 1 (Drosophila)
known_NIR_1351	chr1	41143112;41151684	41151614;41160875	-	41143112;41159933	41159725;41160875	MXE	ENST00000361705.7	known	0.89	16	2	21;11	2;2	y	0.45	7.5	9	9;6	0;18	n	0.33	8	16.5	13;3	25;8	y	0.81	21.5	5	25;18	9;1	n	ENSG00000010803.16	SCMH1	chr1	protein_coding	sex comb on midleg homolog 1 (Drosophila)
known_NIR_1352	chr1	41143112;41159933	41159725;41160875	-	41143112	41160875	cassetteExon	ENST00000361191.9	known	0.17	2	10	2;2	10	y	1	9	0	0;18	0	n	1	16.5	0	25;8	0	n	0.29	5	12	9;1	12	n	ENSG00000010803.16	SCMH1	chr1	protein_coding	sex comb on midleg homolog 1 (Drosophila)
known_NIR_1353	chr1	41151684	41160875	-	41151684	41152599	5pMXE	ENST00000397174.6	known	0.58	11	8	11	8	y	0.43	6	8	6	8	y	0.5	3	3	3	3	n	0.78	18	5	18	5	y	ENSG00000010803.16	SCMH1	chr1	protein_coding	sex comb on midleg homolog 1 (Drosophila)
known_NIR_1354	chr1	41151684;41152741	41152599;41159725	-	41151684	41159725	cassetteExon	ENST00000402904.6	known	1	20	0	8;32	0	n	1	8	0	8;8	0	n	1	3	0	3;3	0	n	0.69	4.5	2	5;4	2	y	ENSG00000010803.16	SCMH1	chr1	protein_coding	sex comb on midleg homolog 1 (Drosophila)
known_NIR_1355	chr1	41152741	41159725	-	41143112	41159725	A3SS	ENST00000361705.7	known	0.94	32	2	32	2	y	1	8	0	8	0	n	0.11	3	25	3	25	y	0.31	4	9	4	9	y	ENSG00000010803.16	SCMH1	chr1	protein_coding	sex comb on midleg homolog 1 (Drosophila)
known_NIR_1356	chr1	41161432	41186121	-	41161432	41162779	5pMXE	ENST00000372595.5	known	0.76	16	5	16	5	y	1	13	0	13	0	n	1	18	0	18	0	n	1	22	0	22	0	n	ENSG00000010803.16	SCMH1	chr1	protein_coding	sex comb on midleg homolog 1 (Drosophila)
known_NIR_1357	chr1	42199230	42227883	-	42199230;42205863	42205762;42227883	ES	ENST00000372572.5	known	0.38	22	36	22	32;40	y	0.49	36	37.5	36	35;40	y	0.12	12	86.5	12	91;82	y	0.23	35	119.5	35	121;118	y	ENSG00000198815.8	FOXJ3	chr1	protein_coding	forkhead box J3
known_NIR_1358	chr1	42456628	42457247	+	42457073	42457247	A5SS	ENST00000372560.3	known	0.08	8	87	8	87	y	0.26	24	70	24	70	y	0.08	4	46	4	46	y	0	0	110	0	110	n	ENSG00000127125.8	PPCS	chr1	protein_coding	phosphopantothenoylcysteine synthetase
known_NIR_1359	chr1	42659370	42659522	+	42659251	42659522	A5SS	ENST00000304979.7	known	0	0	806	0	806	n	0.03	21	798	21	798	y	0	0	813	0	813	n	0.02	19	774	19	774	y	ENSG00000171960.10	PPIH	chr1	protein_coding	peptidylprolyl isomerase H (cyclophilin H)
known_NIR_1360	chr1	42746852	42747272	-	42746852	42747253	A5SS	ENST00000397054.7	known	0.87	165	24	165	24	y	0.75	201	67	201	67	y	0.83	150	30	150	30	y	0.85	246	44	246	44	y	ENSG00000117385.15	P3H1	chr1	protein_coding	prolyl 3-hydroxylase 1
known_NIR_1361	chr1	42846657;42849413	42849291;42850950	+	42846657	42850950	cassetteExon	ENST00000372508.7	known	0.52	15	14	6;24	14	y	0.91	20	2	20;20	2	y	1	1	0	2;0	0	n	0.38	5.5	9	2;9	9	y	ENSG00000164011.17	ZNF691	chr1	protein_coding	zinc finger protein 691
known_NIR_1362	chr1	42846657;42849742	42849291;42850950	+	42846657	42850950	cassetteExon	ENST00000372508.7	known	0.33	7	14	6;8	14	y	0.92	22.5	2	20;25	2	y	1	5	0	2;8	0	n	0.54	10.5	9	2;19	9	y	ENSG00000164011.17	ZNF691	chr1	protein_coding	zinc finger protein 691
known_NIR_1363	chr1	42849413	42850950	+	42849413;42849742	42849565;42850950	ES	ENST00000372502.5	known	0.8	24	6	24	4;8	y	0.61	20	13	20	1;25	n	0	0	6.5	0	5;8	n	0.46	9	10.5	9	2;19	y	ENSG00000164011.17	ZNF691	chr1	protein_coding	zinc finger protein 691
known_NIR_1364	chr1	42849742	42850950	+	42850743	42850950	5pMXE	ENST00000630961.1	known	0.67	8	4	8	4	y	0.93	25	2	25	2	y	1	8	0	8	0	n	0.86	19	3	19	3	y	ENSG00000164011.17	ZNF691	chr1	protein_coding	zinc finger protein 691
known_NIR_1365	chr1	42849742;42850743	42850659;42850950	+	42849742	42850950	cassetteExon	ENST00000372502.5	known	0.27	3	8	2;4	8	y	0.04	1	25	0;2	25	n	0	0	8	0;0	8	n	0.07	1.5	19	0;3	19	n	ENSG00000164011.17	ZNF691	chr1	protein_coding	zinc finger protein 691
known_NIR_1366	chr1	42850743	42850950	+	42846657	42850950	A5SS	ENST00000372508.7	known	0.22	4	14	4	14	y	0.5	2	2	2	2	n	-	-	-	-	-	-	0.25	3	9	3	9	y	ENSG00000164011.17	ZNF691	chr1	protein_coding	zinc finger protein 691
known_NIR_1367	chr1	42850743	42850950	+	42849413	42850950	A5SS	ENST00000372507.5	known	0.14	4	24	4	24	y	0.09	2	20	2	20	y	-	-	-	-	-	-	0.25	3	9	3	9	y	ENSG00000164011.17	ZNF691	chr1	protein_coding	zinc finger protein 691
known_NIR_1368	chr1	43364794	43365186	-	43364794;43365008	43364928;43365186	ES	ENST00000372458.7	known	0.1	44	409.5	44	393;426	y	0.05	26	499	26	455;543	y	0.04	15	398.5	15	389;408	y	0.04	13	358	13	350;366	y	ENSG00000066322.12	ELOVL1	chr1	protein_coding	ELOVL fatty acid elongase 1
known_NIR_1369	chr1	43365623	43367486	-	43365623	43367915	A5SS	ENST00000372458.7	known	0.27	164	436	164	436	y	0.21	143	554	143	554	y	0.29	146	357	146	357	y	0.29	165	395	165	395	y	ENSG00000066322.12	ELOVL1	chr1	protein_coding	ELOVL fatty acid elongase 1
known_NIR_1370	chr1	43387629	43388310	-	43387647	43388310	A3SS	ENST00000290663.10	known	0	0	456	0	456	n	0	0	435	0	435	n	0	0	386	0	386	n	0.03	11	420	11	420	y	ENSG00000159479.16	MED8	chr1	protein_coding	mediator complex subunit 8
known_NIR_1371	chr1	43388489	43389759	-	43388428	43389759	A3SS	ENST00000290663.10	known	0	0	170	0	170	n	0	0	92	0	92	n	0	0	106	0	106	n	0.02	2	121	2	121	y	ENSG00000159479.16	MED8	chr1	protein_coding	mediator complex subunit 8
known_NIR_1372	chr1	43403302	43403601	+	43403302	43403607	A3SS	ENST00000372450.8	known	1	34	0	34	0	n	1	9	0	9	0	n	1	9	0	9	0	n	0.88	45	6	45	6	y	ENSG00000198198.13	SZT2	chr1	protein_coding	seizure threshold 2 homolog (mouse)
known_NIR_1373	chr1	43404550	43415082	+	43404550	43406283	3pMXE	ENST00000372450.8	known	1	49	0	49	0	n	1	4	0	4	0	n	0.33	9	18	9	18	y	0.7	7	3	7	3	y	ENSG00000198198.13	SZT2	chr1	protein_coding	seizure threshold 2 homolog (mouse)
known_NIR_1374	chr1	43451311	43451428	-	43451311	43451410	A5SS	ENST00000372425.8	known	0.61	158	103	158	103	y	0.62	213	129	213	129	y	0.77	225	69	225	69	y	0.66	114	58	114	58	y	ENSG00000178922.16	HYI	chr1	protein_coding	hydroxypyruvate isomerase (putative)
known_NIR_1375	chr1	43452319	43452903	-	43452319	43453386	A5SS	ENST00000372425.8	known	0.28	69	178	69	178	y	0.21	50	192	50	192	y	0.2	59	237	59	237	y	0.23	44	144	44	144	y	ENSG00000178922.16	HYI	chr1	protein_coding	hydroxypyruvate isomerase (putative)
known_NIR_1376	chr1	43598913	43603416	+	43598913;43602097	43602071;43603416	ES	ENST00000359947.8	known	0.99	388	5	388	5;5	y	0.94	305	19	305	21;17	y	0.99	359	3	359	3;3	y	0.96	543	25.5	543	27;24	y	ENSG00000142949.16	PTPRF	chr1	protein_coding	protein tyrosine phosphatase, receptor type, F
known_NIR_1377	chr1	43736380	43792102	+	43736425	43792102	A5SS	ENST00000545417.5	known	-	-	-	-	-	-	1	13	0	13	0	n	0.5	17	17	17	17	y	0.76	13	4	13	4	y	ENSG00000126091.19	ST3GAL3	chr1	protein_coding	ST3 beta-galactoside alpha-2,3-sialyltransferase 3
known_NIR_1378	chr1	43736380	43814891	+	43736380;43792149	43792102;43814891	ES	ENST00000353126.7	known	-	-	-	-	-	-	0.13	2	13	2	13;13	y	0	0	27.5	0	17;38	n	0.22	4	14	4	13;15	y	ENSG00000126091.19	ST3GAL3	chr1	protein_coding	ST3 beta-galactoside alpha-2,3-sialyltransferase 3
known_NIR_1379	chr1	43736380	43814891	+	43792149	43814891	A5SS&ES	ENST00000545417.5	known	-	-	-	-	-	-	0.13	2	13	2	13	y	0	0	38	0	38	n	0.21	4	15	4	15	y	ENSG00000126091.19	ST3GAL3	chr1	protein_coding	ST3 beta-galactoside alpha-2,3-sialyltransferase 3
known_NIR_1380	chr1	43814933;43824892	43824731;43838219	+	43814933	43838219	cassetteExon	ENST00000545417.5	known	0.06	1.5	22	2;1	22	n	0.25	5	15	6;4	15	y	0.11	4	33	5;3	33	y	0.24	6	19	4;8	19	y	ENSG00000126091.19	ST3GAL3	chr1	protein_coding	ST3 beta-galactoside alpha-2,3-sialyltransferase 3
known_NIR_1381	chr1	43899727	43920404	+	43899727	43930132	A3SS	ENST00000353126.7	known	0.75	12	4	12	4	y	1	20	0	20	0	n	1	44	0	44	0	n	0.91	20	2	20	2	y	ENSG00000126091.19	ST3GAL3	chr1	protein_coding	ST3 beta-galactoside alpha-2,3-sialyltransferase 3
known_NIR_1382	chr1	43935716	43936093	+	43935716	43936069	A3SS	ENST00000414809.7	known	-	-	-	-	-	-	0.29	4	10	4	10	y	0	0	6	0	6	n	0.22	2	7	2	7	n	ENSG00000117407.16	ARTN	chr1	protein_coding	artemin
known_NIR_1383	chr1	43971189	43971387	+	43971189	43972158	A3SS	ENST00000396758.6	known	1	181	0	181	0	n	1	70	0	70	0	n	0.81	128	30	128	30	y	0.75	58	19	58	19	y	ENSG00000132768.13	DPH2	chr1	protein_coding	DPH2 homolog (S. cerevisiae)
known_NIR_1384	chr1	43971189	43972158	+	43971189;43972070	43971387;43972158	ES	ENST00000255108.7	known	0	0	151.5	0	181;122	n	0	0	100	0	70;130	n	0.22	30	109	30	128;90	y	0.17	19	94.5	19	58;131	y	ENSG00000132768.13	DPH2	chr1	protein_coding	DPH2 homolog (S. cerevisiae)
known_NIR_1385	chr1	43972070	43972158	+	43971189	43972158	A5SS	ENST00000396758.6	known	1	122	0	122	0	n	1	130	0	130	0	n	0.75	90	30	90	30	y	0.87	131	19	131	19	y	ENSG00000132768.13	DPH2	chr1	protein_coding	DPH2 homolog (S. cerevisiae)
known_NIR_1386	chr1	43975107	43976090	+	43975107;43975848	43975800;43976090	ES	ENST00000472174.6	known	0.1	103	890.5	103	905;876	y	0.15	171	976.5	171	1015;938	y	0.12	106	767	106	772;762	y	0.16	141	725	141	749;701	y	ENSG00000117410.13	ATP6V0B	chr1	protein_coding	ATPase, H+ transporting, lysosomal 21kDa, V0 subunit b
known_NIR_1387	chr1	43975297	43976090	+	43975107	43976090	A5SS	ENST00000236067.8	known	0.17	21	103	21	103	y	0.07	13	171	13	171	y	0	0	106	0	106	n	0.1	15	141	15	141	y	ENSG00000117410.13	ATP6V0B	chr1	protein_coding	ATPase, H+ transporting, lysosomal 21kDa, V0 subunit b
known_NIR_1388	chr1	43975297	43976090	+	43975848	43976090	A5SS&ES	ENST00000472174.6	known	0.02	21	876	21	876	y	0.01	13	938	13	938	y	0	0	762	0	762	n	0.02	15	701	15	701	y	ENSG00000117410.13	ATP6V0B	chr1	protein_coding	ATPase, H+ transporting, lysosomal 21kDa, V0 subunit b
known_NIR_1389	chr1	43980046	43981109	+	43979511	43981109	A5SS	ENST00000372324.5	known	0.31	37	84	37	84	y	0.5	35	35	35	35	y	0.45	66	81	66	81	y	0.37	32	55	32	55	y	ENSG00000117411.16	B4GALT2	chr1	protein_coding	UDP-Gal:betaGlcNAc beta 1,4- galactosyltransferase, polypeptide 2
known_NIR_1390	chr1	43980046	43981109	+	43980614	43981109	A5SS	ENST00000356836.10	known	0.74	37	13	37	13	y	0.88	35	5	35	5	y	0.73	66	25	66	25	y	0.51	32	31	32	31	y	ENSG00000117411.16	B4GALT2	chr1	protein_coding	UDP-Gal:betaGlcNAc beta 1,4- galactosyltransferase, polypeptide 2
known_NIR_1391	chr1	43980614	43981109	+	43979511	43981109	A5SS	ENST00000372324.5	known	0.13	13	84	13	84	y	0.12	5	35	5	35	y	0.24	25	81	25	81	y	0.36	31	55	31	55	y	ENSG00000117411.16	B4GALT2	chr1	protein_coding	UDP-Gal:betaGlcNAc beta 1,4- galactosyltransferase, polypeptide 2
known_NIR_1392	chr1	44048486	44051290	+	44048486	44050950	A3SS	ENST00000434244.5	known	0.33	13	26	13	26	y	1	39	0	39	0	n	0.65	20	11	20	11	y	0.31	12	27	12	27	y	ENSG00000230615.6	RP5-1198O20.4	chr1	lincRNA		--
known_NIR_1393	chr1	44048486	44051290	+	44048486;44051158	44050950;44051290	ES	ENST00000628234.2	known	0.33	13	26.5	13	26;27	y	1	39	0	39	0;0	n	0.71	20	8	20	11;5	y	0.31	12	27	12	27;27	y	ENSG00000230615.6	RP5-1198O20.4	chr1	lincRNA		--
known_NIR_1394	chr1	44051494	44074838	+	44051494	44061132	A3SS&ES	ENST00000434244.5	known	1	7	0	7	0	n	0	0	1	0	1	n	-	-	-	-	-	-	0.25	3	9	3	9	y	ENSG00000230615.6	RP5-1198O20.4	chr1	lincRNA		--
known_NIR_1395	chr1	44051494;44061227	44061132;44076091	+	44051494;44074963	44074838;44076091	MXE	ENST00000437643.1	known	0	0	3.5	0;0	7;0	n	0.71	2.5	1	1;4	0;2	n	1	0.5	0	0;1	0;0	n	0.36	6	10.5	9;3	3;18	y	ENSG00000230615.6	RP5-1198O20.4	chr1	lincRNA		--
known_NIR_1396	chr1	44213527	44213709	+	44213527	44213749	A3SS	ENST00000361745.10	known	1	75	0	75	0	n	0.85	46	8	46	8	y	0.78	73	21	73	21	y	0.72	50	19	50	19	y	ENSG00000178028.13	DMAP1	chr1	protein_coding	DNA methyltransferase 1 associated protein 1
known_NIR_1397	chr1	44319744	44339045	-	44319744	44322725	5pMXE	ENST00000372259.9	known	1	258	0	258	0	n	0.97	220	6	220	6	y	1	242	0	242	0	n	1	239	0	239	0	n	ENSG00000117419.14	ERI3	chr1	protein_coding	ERI1 exoribonuclease family member 3
known_NIR_1398	chr1	44645464	44660174	-	44655119	44660174	3pMXE	ENST00000372235.7	known	-	-	-	-	-	-	0.6	6	4	6	4	y	1	1	0	1	0	n	0	0	10	0	10	n	ENSG00000126106.13	TMEM53	chr1	protein_coding	transmembrane protein 53
known_NIR_1399	chr1	44645464	44660174	-	44655209	44660174	3pMXE	ENST00000372237.7	known	-	-	-	-	-	-	0.6	6	4	6	4	y	0.2	1	4	1	4	n	0	0	6	0	6	n	ENSG00000126106.13	TMEM53	chr1	protein_coding	transmembrane protein 53
known_NIR_1400	chr1	44655119	44660174	-	44655209	44660174	A3SS	ENST00000372242.7	known	-	-	-	-	-	-	0.5	4	4	4	4	n	0	0	4	0	4	n	0.62	10	6	10	6	y	ENSG00000126106.13	TMEM53	chr1	protein_coding	transmembrane protein 53
known_NIR_1401	chr1	44776714	44777614	+	44776774	44777614	A5SS	ENST00000396651.7	known	0.06	793	11596	793	11596	y	0.06	877	13248	877	13248	y	0.06	769	12671	769	12671	y	0.06	736	11960	736	11960	y	ENSG00000142937.11	RPS8	chr1	protein_coding	ribosomal protein S8
known_NIR_1402	chr1	44851003;44857807	44857704;44874678	-	44851003	44874678	cassetteExon	ENST00000620860.4	known	0.76	76	24	54;98	24	y	0.9	111.5	13	91;132	13	y	1	88	0	76;100	0	n	0.9	91.5	10	72;111	10	y	ENSG00000070785.16	EIF2B3	chr1	protein_coding	eukaryotic translation initiation factor 2B, subunit 3 gamma, 58kDa
known_NIR_1403	chr1	45329437	45330516	-	45329437	45334391	A5SS	ENST00000531105.5	known	1	29	0	29	0	n	1	84	0	84	0	n	1	43	0	43	0	n	0.81	43	10	43	10	y	ENSG00000132781.17	MUTYH	chr1	protein_coding	mutY homolog
known_NIR_1404	chr1	45331556	45331661	-	45331556	45332763	A5SS	ENST00000529984.5	known	1	29	0	29	0	n	1	121	0	121	0	n	1	74	0	74	0	n	0.83	49	10	49	10	y	ENSG00000132781.17	MUTYH	chr1	protein_coding	mutY homolog
known_NIR_1405	chr1	45332687	45332763	-	45331556	45332763	A3SS	ENST00000529984.5	known	1	111	0	111	0	n	1	106	0	106	0	n	1	45	0	45	0	n	0.86	62	10	62	10	y	ENSG00000132781.17	MUTYH	chr1	protein_coding	mutY homolog
known_NIR_1406	chr1	45332834	45332918	-	45332834	45334391	A5SS	ENST00000529984.5	known	0.75	65	22	65	22	y	1	76	0	76	0	n	1	20	0	20	0	n	0.89	65	8	65	8	y	ENSG00000132781.17	MUTYH	chr1	protein_coding	mutY homolog
known_NIR_1407	chr1	45332834	45334391	-	45329437	45334391	A3SS	ENST00000531105.5	known	1	22	0	22	0	n	-	-	-	-	-	-	-	-	-	-	-	-	0.44	8	10	8	10	y	ENSG00000132781.17	MUTYH	chr1	protein_coding	mutY homolog
known_NIR_1408	chr1	45333561	45334391	-	45329437	45334391	A3SS	ENST00000531105.5	known	1	16	0	16	0	n	1	56	0	56	0	n	1	43	0	43	0	n	0.77	34	10	34	10	y	ENSG00000132781.17	MUTYH	chr1	protein_coding	mutY homolog
known_NIR_1409	chr1	45333561	45334391	-	45332834	45334391	A3SS	ENST00000529984.5	known	0.42	16	22	16	22	y	1	56	0	56	0	n	1	43	0	43	0	n	0.81	34	8	34	8	y	ENSG00000132781.17	MUTYH	chr1	protein_coding	mutY homolog
known_NIR_1410	chr1	45333564	45334391	-	45333561	45334391	A3SS	ENST00000372104.5	known	0	0	16	0	16	n	0.12	8	56	8	56	y	0.14	7	43	7	43	y	0	0	34	0	34	n	ENSG00000132781.17	MUTYH	chr1	protein_coding	mutY homolog
known_NIR_1411	chr1	45333564	45334391	-	45333594	45334391	A3SS	ENST00000448481.5	known	-	-	-	-	-	-	0.26	8	23	8	23	y	0.78	7	2	7	2	n	0	0	6	0	6	n	ENSG00000132781.17	MUTYH	chr1	protein_coding	mutY homolog
known_NIR_1412	chr1	45333594	45334391	-	45329437	45334391	A3SS	ENST00000531105.5	known	-	-	-	-	-	-	1	23	0	23	0	n	1	2	0	2	0	n	0.38	6	10	6	10	y	ENSG00000132781.17	MUTYH	chr1	protein_coding	mutY homolog
known_NIR_1413	chr1	45333594	45334391	-	45332834	45334391	A3SS	ENST00000529984.5	known	0	0	22	0	22	n	1	23	0	23	0	n	1	2	0	2	0	n	0.43	6	8	6	8	y	ENSG00000132781.17	MUTYH	chr1	protein_coding	mutY homolog
known_NIR_1414	chr1	45333594	45334391	-	45333561	45334391	A3SS	ENST00000372104.5	known	0	0	16	0	16	n	0.29	23	56	23	56	y	0.04	2	43	2	43	y	0.15	6	34	6	34	y	ENSG00000132781.17	MUTYH	chr1	protein_coding	mutY homolog
known_NIR_1415	chr1	45334511	45338507	-	45334511	45339976	A5SS	ENST00000354383.10	known	0.5	6	6	6	6	y	0.32	6	13	6	13	y	0	0	8	0	8	n	0.19	6	25	6	25	y	ENSG00000132781.17	MUTYH	chr1	protein_coding	mutY homolog
known_NIR_1416	chr1	45334511	45338507	-	45334511	45340219	A5SS	ENST00000529984.5	known	0.17	6	29	6	29	y	0.18	6	28	6	28	y	0	0	27	0	27	n	0.26	6	17	6	17	y	ENSG00000132781.17	MUTYH	chr1	protein_coding	mutY homolog
known_NIR_1417	chr1	45334511	45339899	-	45334511	45340219	A5SS	ENST00000529984.5	known	0	0	29	0	29	n	0.53	31	28	31	28	y	0.34	14	27	14	27	y	0.37	10	17	10	17	y	ENSG00000132781.17	MUTYH	chr1	protein_coding	mutY homolog
known_NIR_1418	chr1	45334511	45339899	-	45334511;45338656	45338507;45339899	ES	ENST00000372104.5	known	0	0	5.5	0	6;5	n	0.84	31	6	31	6;6	y	1	14	0	14	0;0	n	0.74	10	3.5	10	6;1	n	ENSG00000132781.17	MUTYH	chr1	protein_coding	mutY homolog
known_NIR_1419	chr1	45334511	45339976	-	45334511	45339899	5pMXE	ENST00000448481.5	known	1	6	0	6	0	n	0.3	13	31	13	31	y	0.36	8	14	8	14	y	0.71	25	10	25	10	y	ENSG00000132781.17	MUTYH	chr1	protein_coding	mutY homolog
known_NIR_1420	chr1	45334511	45339976	-	45334511	45340219	A5SS	ENST00000529984.5	known	0.17	6	29	6	29	y	0.32	13	28	13	28	y	0.23	8	27	8	27	y	0.6	25	17	25	17	y	ENSG00000132781.17	MUTYH	chr1	protein_coding	mutY homolog
known_NIR_1421	chr1	45519054	45521829	-	45519054	45521609	A5SS	ENST00000262746.5	known	0.96	5907	273	5907	273	y	0.95	6389	338	6389	338	y	0.96	6589	286	6589	286	y	0.96	7006	314	7006	314	y	ENSG00000117450.13	PRDX1	chr1	protein_coding	peroxiredoxin 1
known_NIR_1422	chr1	45551155	45561789	+	45551155;45552563	45552436;45561789	ES	ENST00000372070.7	known	0.71	352	144	352	164;124	y	0.76	452	143.5	452	156;131	y	0.67	371	181.5	371	147;216	y	0.71	365	149	365	135;163	y	ENSG00000117448.13	AKR1A1	chr1	protein_coding	aldo-keto reductase family 1, member A1 (aldehyde reductase)
known_NIR_1423	chr1	45591270	45594694	+	45591270	45602255	A3SS	ENST00000350030.7	known	0	0	613	0	613	n	0	2	686	2	686	y	0.01	6	783	6	783	y	0	0	839	0	839	n	ENSG00000132780.16	NASP	chr1	protein_coding	nuclear autoantigenic sperm protein (histone-binding)
known_NIR_1424	chr1	45591270	45594694	+	45591270	45606482	A3SS	ENST00000537798.5	known	-	-	-	-	-	-	0.07	2	25	2	25	y	0.35	6	11	6	11	y	0	0	15	0	15	n	ENSG00000132780.16	NASP	chr1	protein_coding	nuclear autoantigenic sperm protein (histone-binding)
known_NIR_1425	chr1	45605016	45606482	+	45591270	45606482	A5SS	ENST00000537798.5	known	1	587	0	587	0	n	0.95	525	25	525	25	y	0.99	778	11	778	11	y	0.98	778	15	778	15	y	ENSG00000132780.16	NASP	chr1	protein_coding	nuclear autoantigenic sperm protein (histone-binding)
known_NIR_1426	chr1	45606591	45607321	+	45606591	45613169	A3SS	ENST00000372052.8	known	0.38	281	457	281	457	y	0.45	297	356	297	356	y	0.41	338	485	338	485	y	0.46	419	490	419	490	y	ENSG00000132780.16	NASP	chr1	protein_coding	nuclear autoantigenic sperm protein (histone-binding)
known_NIR_1427	chr1	45606591	45613169	+	45606591;45608337	45607321;45613169	ES	ENST00000537798.5	known	0.66	457	234	457	281;187	y	0.59	356	245	356	297;193	y	0.63	485	280	485	338;222	y	0.59	490	343	490	419;267	y	ENSG00000132780.16	NASP	chr1	protein_coding	nuclear autoantigenic sperm protein (histone-binding)
known_NIR_1428	chr1	45608337	45613169	+	45606591	45613169	A5SS	ENST00000372052.8	known	0.29	187	457	187	457	y	0.35	193	356	193	356	y	0.31	222	485	222	485	y	0.35	267	490	267	490	y	ENSG00000132780.16	NASP	chr1	protein_coding	nuclear autoantigenic sperm protein (histone-binding)
known_NIR_1429	chr1	45661225;45685620	45685576;45686412	-	45661225	45686412	cassetteExon	ENST00000290795.7	known	0.52	56	51	66;46	51	y	0.6	55	36	75;35	36	y	0.73	72	27	89;55	27	y	0.56	36	28	36;36	28	y	ENSG00000159592.10	GPBP1L1	chr1	protein_coding	GC-rich promoter binding protein 1-like 1
known_NIR_1430	chr1	46034266	46034827	+	46034266	46034538	A3SS	ENST00000361297.6	known	0.1	2	19	2	19	y	0	0	58	0	58	n	0	0	45	0	45	n	0.12	13	92	13	92	y	ENSG00000086015.20	MAST2	chr1	protein_coding	microtubule associated serine/threonine kinase 2
known_NIR_1431	chr1	46194651;46194961	46194844;46195811	-	46194651	46195811	cassetteExon	ENST00000396420.7	known	1	188.5	0	225;152	0	n	0.96	258.5	11	272;245	11	y	1	167.5	0	151;184	0	n	1	219	0	212;226	0	n	ENSG00000085998.13	POMGNT1	chr1	protein_coding	protein O-linked mannose N-acetylglucosaminyltransferase 1 (beta 1,2-)
known_NIR_1432	chr1	46341865	46344801	+	46340919	46344801	A5SS	ENST00000474844.5	known	0	0	19	0	19	n	0.09	4	41	4	41	y	0.08	5	57	5	57	y	0.07	4	57	4	57	y	ENSG00000117481.10	NSUN4	chr1	protein_coding	NOP2/Sun domain family, member 4
known_NIR_1433	chr1	46344294	46344801	+	46340919	46344801	A5SS	ENST00000474844.5	known	0	0	19	0	19	n	0.18	9	41	9	41	y	0	0	57	0	57	n	0	0	57	0	57	n	ENSG00000117481.10	NSUN4	chr1	protein_coding	NOP2/Sun domain family, member 4
known_NIR_1434	chr1	46344294	46344801	+	46341865	46344801	A5SS	ENST00000537428.2	known	-	-	-	-	-	-	0.69	9	4	9	4	y	0	0	5	0	5	n	0	0	4	0	4	n	ENSG00000117481.10	NSUN4	chr1	protein_coding	NOP2/Sun domain family, member 4
known_NIR_1435	chr1	46558800	46561478	-	46558800;46560277	46560234;46561478	ES	ENST00000341183.9	known	0.74	61	21.5	61	35;8	y	0.39	25	38.5	25	48;29	y	0.46	35	40.5	35	44;37	y	0.44	42	52.5	42	59;46	y	ENSG00000079277.19	MKNK1	chr1	protein_coding	MAP kinase interacting serine/threonine kinase 1
known_NIR_1436	chr1	46568498;46571539	46571417;46572063	-	46568498	46572063	cassetteExon	ENST00000341183.9	known	0.2	9	36	6;12	36	y	0.03	3	92	0;6	92	n	0.19	20	84	27;13	84	y	0.21	18	68	5;31	68	y	ENSG00000079277.19	MKNK1	chr1	protein_coding	MAP kinase interacting serine/threonine kinase 1
known_NIR_1437	chr1	46594280	46604227	-	46594280	46604185	A5SS	ENST00000341183.9	known	0.73	11	4	11	4	y	0.35	26	48	26	48	y	0.5	31	31	31	31	y	0.52	33	31	33	31	y	ENSG00000079277.19	MKNK1	chr1	protein_coding	MAP kinase interacting serine/threonine kinase 1
known_NIR_1438	chr1	46635970	46643194	-	46635970	46652581	A5SS	ENST00000329231.8	known	1	92	0	92	0	n	0.92	209	18	209	18	y	0.91	138	13	138	13	y	0.86	108	17	108	17	y	ENSG00000123472.12	ATPAF1	chr1	protein_coding	ATP synthase mitochondrial F1 complex assembly factor 1
known_NIR_1439	chr1	46645256	46652581	-	46635970	46652581	A3SS	ENST00000329231.8	known	1	186	0	186	0	n	0.94	259	18	259	18	y	0.94	214	13	214	13	y	0.91	175	17	175	17	y	ENSG00000123472.12	ATPAF1	chr1	protein_coding	ATP synthase mitochondrial F1 complex assembly factor 1
known_NIR_1440	chr1	47263062	47269635	-	47263113	47269635	A3SS	ENST00000360380.7	known	0	0	12	0	12	n	0.26	11	32	11	32	y	0.23	15	51	15	51	y	0.12	9	65	9	65	y	ENSG00000123473.15	STIL	chr1	protein_coding	SCL/TAL1 interrupting locus
known_NIR_1441	chr1	47263062	47269635	-	47263116	47269635	A3SS	ENST00000337817.9	known	0	0	37	0	37	n	0.32	11	23	11	23	y	0.45	15	18	15	18	y	0.22	9	32	9	32	y	ENSG00000123473.15	STIL	chr1	protein_coding	SCL/TAL1 interrupting locus
known_NIR_1442	chr1	47263116	47269635	-	47263113	47269635	A3SS	ENST00000360380.7	known	0.76	37	12	37	12	y	0.42	23	32	23	32	y	0.26	18	51	18	51	y	0.33	32	65	32	65	y	ENSG00000123473.15	STIL	chr1	protein_coding	SCL/TAL1 interrupting locus
known_NIR_1443	chr1	47310362	47314036	-	47310362	47312948	5pMXE	ENST00000396221.6	known	0.86	18	3	18	3	y	0.52	15	14	15	14	y	0.32	15	32	15	32	y	1	56	0	56	0	n	ENSG00000123473.15	STIL	chr1	protein_coding	SCL/TAL1 interrupting locus
known_NIR_1444	chr1	47334116	47372955	+	47334116;47368615	47368469;47372955	ES	ENST00000371873.9	known	0	0	147.5	0	176;119	n	0.01	2	225.5	2	149;302	y	0.01	2	266.5	2	236;297	y	0.03	8	308.5	8	265;352	y	ENSG00000162368.13	CMPK1	chr1	protein_coding	cytidine monophosphate (UMP-CMP) kinase 1, cytosolic
known_NIR_1445	chr1	495049	497109	-	495049	495277	5pMXE	ENST00000601814.5	known	0.83	30	6	30	6	y	1	5	0	5	0	n	1	14	0	14	0	n	1	18	0	18	0	n	ENSG00000237094.11	RP4-669L17.10	chr1	lincRNA		--
known_NIR_1446	chr1	51714079;51740211	51740143;51745536	+	51714079	51745536	cassetteExon	ENST00000371714.5	known	0	0	94	0;0	94	n	0	0	106	0;0	106	n	0.04	4	103	4;4	103	y	0	0	83	0;0	83	n	ENSG00000117859.18	OSBPL9	chr1	protein_coding	oxysterol binding protein-like 9
known_NIR_1447	chr1	51730001	51745536	+	51714079	51745536	A5SS	ENST00000371714.5	known	0.15	16	94	16	94	y	0.14	17	106	17	106	y	0.15	18	103	18	103	y	0.42	60	83	60	83	y	ENSG00000117859.18	OSBPL9	chr1	protein_coding	oxysterol binding protein-like 9
known_NIR_1448	chr1	51730001	51745536	+	51730124	51745536	A5SS	ENST00000531828.5	known	0.46	16	19	16	19	y	0.31	17	38	17	38	y	0.19	18	76	18	76	y	0.48	60	65	60	65	y	ENSG00000117859.18	OSBPL9	chr1	protein_coding	oxysterol binding protein-like 9
known_NIR_1449	chr1	51730001	51745536	+	51740211	51745536	A5SS&ES	ENST00000447887.5	known	1	16	0	16	0	n	1	17	0	17	0	n	0.82	18	4	18	4	y	1	60	0	60	0	n	ENSG00000117859.18	OSBPL9	chr1	protein_coding	oxysterol binding protein-like 9
known_NIR_1450	chr1	51730124	51745536	+	51714079	51745536	A5SS	ENST00000371714.5	known	0.17	19	94	19	94	y	0.26	38	106	38	106	y	0.42	76	103	76	103	y	0.44	65	83	65	83	y	ENSG00000117859.18	OSBPL9	chr1	protein_coding	oxysterol binding protein-like 9
known_NIR_1451	chr1	51730124	51745536	+	51740211	51745536	A5SS&ES	ENST00000447887.5	known	1	19	0	19	0	n	1	38	0	38	0	n	0.95	76	4	76	4	y	1	65	0	65	0	n	ENSG00000117859.18	OSBPL9	chr1	protein_coding	oxysterol binding protein-like 9
known_NIR_1452	chr1	51750195;51756358	51756320;51760690	+	51750195	51760690	cassetteExon	ENST00000371714.5	known	0.14	17.5	111	23;12	111	y	0.23	43	147	50;36	147	y	0.2	54	211	44;64	211	y	0.35	70.5	129	65;76	129	y	ENSG00000117859.18	OSBPL9	chr1	protein_coding	oxysterol binding protein-like 9
known_NIR_1453	chr1	51836212	51836369	-	51836212	51840226	A5SS	ENST00000352171.11	known	0.08	25	286	25	286	y	0.08	37	430	37	430	y	0.05	40	720	40	720	y	0.03	17	539	17	539	y	ENSG00000078618.19	NRD1	chr1	protein_coding	nardilysin (N-arginine dibasic convertase)
known_NIR_1454	chr1	51837620	51840226	-	51836212	51840226	A3SS	ENST00000352171.11	known	0.09	28	286	28	286	y	0.02	10	430	10	430	y	0.04	31	720	31	720	y	0.05	31	539	31	539	y	ENSG00000078618.19	NRD1	chr1	protein_coding	nardilysin (N-arginine dibasic convertase)
known_NIR_1455	chr1	52034051	52041537	-	52028630	52041537	A3SS	ENST00000371626.8	known	0	0	192	0	192	n	0	0	204	0	204	n	0	0	146	0	146	n	0.04	8	180	8	180	y	ENSG00000117862.11	TXNDC12	chr1	protein_coding	thioredoxin domain containing 12 (endoplasmic reticulum)
known_NIR_1456	chr1	52056379	52064825	+	52056379;52059901	52059835;52064825	ES	ENST00000313334.12	known	0	0	244	0	197;291	n	0.06	19	274	19	189;359	y	0.1	34	311	34	223;399	y	0.11	36	295.5	36	228;363	y	ENSG00000134717.17	BTF3L4	chr1	protein_coding	basic transcription factor 3-like 4
known_NIR_1457	chr1	52064938	52086112	+	52064938;52083541	52083340;52086112	ES	ENST00000313334.12	known	0.22	82	299	82	349;249	y	0.13	53	346.5	53	360;333	y	0.18	91	417	91	461;373	y	0.23	88	296	88	268;324	y	ENSG00000134717.17	BTF3L4	chr1	protein_coding	basic transcription factor 3-like 4
known_NIR_1458	chr1	52263872	52268463	+	52263872;52266831	52266655;52268463	ES	ENST00000287727.7	known	0	0	11	0	10;12	n	0.3	8	18.5	8	20;17	y	0	0	11.5	0	11;12	n	0.15	2	11	2	7;15	y	ENSG00000157077.14	ZFYVE9	chr1	protein_coding	zinc finger, FYVE domain containing 9
known_NIR_1459	chr1	52357898	52358331	-	52357916	52358331	A3SS	ENST00000371586.6	known	0.83	68	14	68	14	y	1	59	0	59	0	n	0.85	107	19	107	19	y	0.9	119	13	119	13	y	ENSG00000154222.14	CC2D1B	chr1	protein_coding	coiled-coil and C2 domain containing 1B
known_NIR_1460	chr1	52402225	52404246	-	52402228	52404246	A3SS	ENST00000371568.7	known	0.06	15	245	15	245	y	0.16	28	145	28	145	y	0.02	3	126	3	126	y	0.24	42	131	42	131	y	ENSG00000085840.12	ORC1	chr1	protein_coding	origin recognition complex, subunit 1
known_NIR_1461	chr1	52436975	52438220	-	52436978	52438220	A3SS	ENST00000257177.8	known	-	-	-	-	-	-	-	-	-	-	-	-	-	-	-	-	-	-	0.12	2	14	2	14	y	ENSG00000134744.13	ZCCHC11	chr1	protein_coding	zinc finger, CCHC domain containing 11
known_NIR_1462	chr1	52854630	52856998	+	52854630	52860731	A3SS	ENST00000612017.4	known	0.83	25	5	25	5	y	0.74	20	7	20	7	y	0.75	38	13	38	13	y	0.83	68	14	68	14	y	ENSG00000203995.9	ZYG11A	chr1	protein_coding	zyg-11 family member A, cell cycle regulator
known_NIR_1463	chr1	52854630	52860731	+	52854630;52857749	52856998;52860731	ES	ENST00000371528.1	known	0.16	5	26	5	25;27	y	0.28	7	18	7	20;16	y	0.29	13	32	13	38;26	y	0.23	14	47	14	68;26	y	ENSG00000203995.9	ZYG11A	chr1	protein_coding	zyg-11 family member A, cell cycle regulator
known_NIR_1464	chr1	52857749	52860731	+	52854630	52860731	A5SS	ENST00000612017.4	known	0.84	27	5	27	5	y	0.7	16	7	16	7	y	0.67	26	13	26	13	y	0.65	26	14	26	14	y	ENSG00000203995.9	ZYG11A	chr1	protein_coding	zyg-11 family member A, cell cycle regulator
known_NIR_1465	chr1	53028071	53047858	+	53028071;53039046	53038917;53047858	ES	ENST00000371514.7	known	0.01	3	205	3	214;196	y	0.04	8	214.5	8	226;203	y	0.01	3	256.5	3	320;193	y	0.08	23	256.5	23	238;275	y	ENSG00000116171.16	SCP2	chr1	protein_coding	sterol carrier protein 2
known_NIR_1466	chr1	53228954	53235577	-	53228954;53233652	53233542;53235577	ES	ENST00000371470.7	known	0.25	156	461.5	156	402;521	y	0.26	200	555	200	476;634	y	0.39	330	526.5	330	463;590	y	0.33	272	555.5	272	441;670	y	ENSG00000162385.10	MAGOH	chr1	protein_coding	mago-nashi homolog, proliferation-associated (Drosophila)
known_NIR_1467	chr1	53247056	53250690	-	53247056;53249556	53249380;53250690	ES	ENST00000306052.10	known	0.74	87	30.5	87	49;12	y	0.71	76	30.5	76	35;26	y	0.48	77	84	77	94;74	y	0.66	183	94.5	183	98;91	y	ENSG00000157193.14	LRP8	chr1	protein_coding	low density lipoprotein receptor-related protein 8, apolipoprotein e receptor
known_NIR_1468	chr1	53255185	53258319	-	53255185;53257464	53257240;53258319	ES	ENST00000306052.10	known	0.43	79	106	79	82;130	y	0.29	42	100.5	42	72;129	y	0.27	50	137.5	50	144;131	y	0.39	90	141	90	118;164	y	ENSG00000157193.14	LRP8	chr1	protein_coding	low density lipoprotein receptor-related protein 8, apolipoprotein e receptor
known_NIR_1469	chr1	53266647	53271227	-	53266647;53271153	53271028;53271227	ES	ENST00000306052.10	known	0	0	146	0	160;132	n	0.01	1	112.5	1	116;109	n	0	0	167	0	151;183	n	0.11	23	180	23	190;170	y	ENSG00000157193.14	LRP8	chr1	protein_coding	low density lipoprotein receptor-related protein 8, apolipoprotein e receptor
known_NIR_1470	chr1	53271346	53280587	-	53271346;53275753	53275631;53280587	ES	ENST00000465675.5	known	0	0	52	0	54;50	n	0	0	60.5	0	57;64	n	0.21	16	61	16	47;75	y	0.05	3	63	3	50;76	y	ENSG00000157193.14	LRP8	chr1	protein_coding	low density lipoprotein receptor-related protein 8, apolipoprotein e receptor
known_NIR_1471	chr1	53275753	53280587	-	53275753;53277078	53276692;53280587	ES	ENST00000306052.10	known	0.51	50	48.5	50	41;56	y	0.77	64	19	64	2;36	y	0.73	75	28	75	35;21	y	0.67	76	38	76	14;62	y	ENSG00000157193.14	LRP8	chr1	protein_coding	low density lipoprotein receptor-related protein 8, apolipoprotein e receptor
known_NIR_1472	chr1	53277078	53280587	-	53271346	53280587	A3SS	ENST00000347547.6	known	1	56	0	56	0	n	1	36	0	36	0	n	0.57	21	16	21	16	y	0.95	62	3	62	3	y	ENSG00000157193.14	LRP8	chr1	protein_coding	low density lipoprotein receptor-related protein 8, apolipoprotein e receptor
known_NIR_1473	chr1	53326992	53327258	-	53326992	53327789	A5SS	ENST00000306052.10	known	0	0	67	0	67	n	0.09	6	59	6	59	y	0	0	62	0	62	n	0	0	79	0	79	n	ENSG00000157193.14	LRP8	chr1	protein_coding	low density lipoprotein receptor-related protein 8, apolipoprotein e receptor
known_NIR_1474	chr1	53946549	53951986	+	53946549;53947821	53947788;53951986	ES	ENST00000371370.7	known	0.51	93	88	93	92;84	y	0.32	45	94	45	98;90	y	0.39	64	100.5	64	105;96	y	0.27	51	137.5	51	135;140	y	ENSG00000116212.14	LRRC42	chr1	protein_coding	leucine rich repeat containing 42
known_NIR_1475	chr1	54047372	54053356	-	54047372	54053000	A5SS	ENST00000234831.9	known	0.06	30	507	30	507	y	0.03	18	538	18	538	y	0.08	49	604	49	604	y	0.07	61	775	61	775	y	ENSG00000116209.11	TMEM59	chr1	protein_coding	transmembrane protein 59
known_NIR_1476	chr1	54216344	54225125	+	54216344	54218172	3pMXE	ENST00000336230.10	known	0	0	654	0	654	n	0.01	7	815	7	815	y	0	0	791	0	791	n	0.01	5	715	5	715	y	ENSG00000116221.15	MRPL37	chr1	protein_coding	mitochondrial ribosomal protein L37
known_NIR_1477	chr1	54257186;54258149	54258069;54281438	-	54257186	54281438	cassetteExon	ENST00000610401.4	known	0.22	16	56	10;22	56	y	0.17	21.5	105	28;15	105	y	0.26	35.5	101	33;38	101	y	0.13	27	182	26;28	182	y	ENSG00000157216.15	SSBP3	chr1	protein_coding	single stranded DNA binding protein 3
known_NIR_1478	chr1	5879632	5880114	-	5877298	5880114	A3SS	ENST00000378156.8	known	0	0	49	0	49	n	0	0	28	0	28	n	0	0	17	0	17	n	0.29	16	40	16	40	y	ENSG00000131697.17	NPHP4	chr1	protein_coding	nephronophthisis 4
known_NIR_1479	chr1	5905780	5907115	-	5905783	5907115	A3SS	ENST00000378156.8	known	0.79	42	11	42	11	y	0.49	20	21	20	21	y	0.2	1	4	1	4	n	0.64	16	9	16	9	y	ENSG00000131697.17	NPHP4	chr1	protein_coding	nephronophthisis 4
known_NIR_1480	chr1	6026445	6040517	+	5992788	6040517	A5SS	ENST00000378097.5	known	0.83	195	40	195	40	y	0.79	147	40	147	40	y	0.77	144	43	144	43	y	0.74	126	45	126	45	y	ENSG00000069424.14	KCNAB2	chr1	protein_coding	potassium channel, voltage gated subfamily A regulatory beta subunit 2
known_NIR_1481	chr1	6040645	6072755	+	6040645;6041872	6041831;6072755	ES	ENST00000378111.5	known	0.63	169	101	169	83;119	y	0.74	164	56.5	164	43;70	y	0.63	134	78.5	134	82;75	y	0.77	169	49.5	169	40;59	y	ENSG00000069424.14	KCNAB2	chr1	protein_coding	potassium channel, voltage gated subfamily A regulatory beta subunit 2
known_NIR_1482	chr1	6090475;6091307	6091263;6094400	+	6090475	6094400	cassetteExon	ENST00000378097.5	known	0	0	213	0;0	213	n	0	0	204	0;0	204	n	0	0	185	0;0	185	n	0.04	9	237	2;16	237	y	ENSG00000069424.14	KCNAB2	chr1	protein_coding	potassium channel, voltage gated subfamily A regulatory beta subunit 2
known_NIR_1483	chr1	61406727	61455303	+	61406727;61426556	61426465;61455303	ES	ENST00000371191.5	known	-	-	-	-	-	-	0.89	17	2	17	4;0	n	0.17	4	19	4	17;21	y	0.59	18	12.5	18	11;14	y	ENSG00000162599.15	NFIA	chr1	protein_coding	nuclear factor I/A
known_NIR_1484	chr1	6197756	6200489	-	6197756	6199562	5pMXE	ENST00000234875.8	known	0	0	3145	0	3145	n	0.03	96	3378	96	3378	y	0.04	142	3302	142	3302	y	0.03	96	3021	96	3021	y	ENSG00000116251.9	RPL22	chr1	protein_coding	ribosomal protein L22
known_NIR_1485	chr1	62437400	62439799	+	62436562	62439799	A5SS	ENST00000371146.5	known	1	58	0	58	0	n	1	69	0	69	0	n	0.96	87	4	87	4	y	0.97	100	3	100	3	y	ENSG00000162607.12	USP1	chr1	protein_coding	ubiquitin specific peptidase 1
known_NIR_1486	chr1	62510673	62513444	-	62510673	62513471	A5SS	ENST00000251157.9	known	0	0	5	0	5	n	0.29	6	15	6	15	y	0	0	20	0	20	n	0.07	3	38	3	38	y	ENSG00000116641.15	DOCK7	chr1	protein_coding	dedicator of cytokinesis 7
known_NIR_1487	chr1	62543745	62552732	-	62543745;62545039	62544947;62552732	ES	ENST00000251157.9	known	0	0	4	0	0;8	n	0.27	4	11	4	11;11	y	0.46	16	18.5	16	18;19	y	0.52	11	10	11	15;5	y	ENSG00000116641.15	DOCK7	chr1	protein_coding	dedicator of cytokinesis 7
known_NIR_1488	chr1	62784225	62803719	+	62784273	62803719	A5SS	ENST00000317868.8	known	0.79	30	8	30	8	y	0.54	13	11	13	11	y	0.52	30	28	30	28	y	0.24	5	16	5	16	y	ENSG00000125703.14	ATG4C	chr1	protein_coding	autophagy related 4C, cysteine peptidase
known_NIR_1489	chr1	6349866	6385494	-	6349866	6393257	A5SS	ENST00000608083.5	known	0.24	100	314	100	314	y	0.22	102	362	102	362	y	0.11	29	233	29	233	y	0.11	31	263	31	263	y	ENSG00000097021.19	ACOT7	chr1	protein_coding	acyl-CoA thioesterase 7
known_NIR_1490	chr1	63508570	63523129	-	63508570;63510181	63510065;63523129	ES	ENST00000371092.7	known	0.96	92	4	92	0;8	n	0.88	92	12.5	92	17;8	y	0.95	112	6.5	112	13;0	n	0.89	149	17.5	149	24;11	y	ENSG00000142856.16	ITGB3BP	chr1	protein_coding	integrin beta 3 binding protein (beta3-endonexin)
known_NIR_1491	chr1	6419153	6419607	-	6413282	6419607	A3SS	ENST00000377837.5	known	0	0	16	0	16	n	0.24	9	28	9	28	y	0	0	27	0	27	n	0.26	7	20	7	20	y	ENSG00000069812.11	HES2	chr1	protein_coding	hes family bHLH transcription factor 2
known_NIR_1492	chr1	6419153	6419607	-	6419153;6419340	6419241;6419607	ES	ENST00000377834.8	known	0	0	27.5	0	22;33	n	0.24	9	28.5	9	34;23	y	0	0	31	0	37;25	n	0.17	7	33.5	7	37;30	y	ENSG00000069812.11	HES2	chr1	protein_coding	hes family bHLH transcription factor 2
known_NIR_1493	chr1	6419153	6419607	-	6419340	6419607	A3SS	ENST00000489730.1	known	0	0	33	0	33	n	0.28	9	23	9	23	y	0	0	25	0	25	n	0.19	7	30	7	30	y	ENSG00000069812.11	HES2	chr1	protein_coding	hes family bHLH transcription factor 2
known_NIR_1494	chr1	6419340	6419607	-	6413282	6419607	A3SS	ENST00000377837.5	known	0.67	33	16	33	16	y	0.45	23	28	23	28	y	0.48	25	27	25	27	y	0.6	30	20	30	20	y	ENSG00000069812.11	HES2	chr1	protein_coding	hes family bHLH transcription factor 2
known_NIR_1495	chr1	6477658	6491637	-	6477658	6496493	A5SS	ENST00000537245.5	known	-	-	-	-	-	-	0.31	5	11	5	11	y	0	0	2	0	2	n	0	0	3	0	3	n	ENSG00000171680.20	PLEKHG5	chr1	protein_coding	pleckstrin homology domain containing, family G (with RhoGef domain) member 5
known_NIR_1496	chr1	6477658	6496493	-	6477658	6490445	5pMXE	ENST00000340850.9	known	0	0	6	0	6	n	1	11	0	11	0	n	0.08	2	24	2	24	y	0.43	3	4	3	4	n	ENSG00000171680.20	PLEKHG5	chr1	protein_coding	pleckstrin homology domain containing, family G (with RhoGef domain) member 5
known_NIR_1497	chr1	65148057	65148278	+	65147665	65148278	A5SS	ENST00000545314.5	known	0	0	38	0	38	n	0.49	24	25	24	25	y	0.22	11	40	11	40	y	0.67	30	15	30	15	y	ENSG00000162433.14	AK4	chr1	protein_coding	adenylate kinase 4
known_NIR_1498	chr1	65425378	65429862	+	65425378	65565546	A3SS	ENST00000371059.7	known	0.97	70	2	70	2	y	0.86	134	21	134	21	y	1	151	0	151	0	n	0.99	124	1	124	1	n	ENSG00000116678.18	LEPR	chr1	protein_coding	leptin receptor
known_NIR_1499	chr1	65622981	65633152	+	65622981	65630202	3pMXE	ENST00000371059.7	known	1	14	0	14	0	n	0.73	8	3	8	3	y	0	0	14	0	14	n	1	16	0	16	0	n	ENSG00000116678.18	LEPR	chr1	protein_coding	leptin receptor
known_NIR_1500	chr1	6628691	6630291	+	6628691	6630288	A3SS	ENST00000054650.8	known	0	0	61	0	61	n	0.11	11	90	11	90	y	0	0	49	0	49	n	0.15	15	88	15	88	y	ENSG00000041988.15	THAP3	chr1	protein_coding	THAP domain containing, apoptosis associated protein 3
known_NIR_1501	chr1	6632495	6634020	+	6632495	6632796	3pMXE	ENST00000054650.8	known	0.13	12	78	12	78	y	0	0	46	0	46	n	0.09	6	63	6	63	y	0.04	4	93	4	93	y	ENSG00000041988.15	THAP3	chr1	protein_coding	THAP domain containing, apoptosis associated protein 3
known_NIR_1502	chr1	6638364	6644558	-	6638364;6640057	6639902;6644558	ES	ENST00000377577.9	known	0.05	15	281	15	219;343	y	0.07	19	245.5	19	241;250	y	0.03	7	248.5	7	227;270	y	0	0	273	0	289;257	n	ENSG00000007923.15	DNAJC11	chr1	protein_coding	DnaJ (Hsp40) homolog, subfamily C, member 11
known_NIR_1503	chr1	66930400	66940028	+	66926242	66940028	A5SS	ENST00000355977.10	known	1	5	0	5	0	n	0.57	12	9	12	9	y	0.89	126	16	126	16	y	0.63	40	23	40	23	y	ENSG00000198160.14	MIER1	chr1	protein_coding	mesoderm induction early response 1, transcriptional regulator
known_NIR_1504	chr1	66930400	66940028	+	66928963	66940028	A5SS	ENST00000371018.7	known	1	5	0	5	0	n	0.92	12	1	12	1	n	0.93	126	10	126	10	y	0.89	40	5	40	5	y	ENSG00000198160.14	MIER1	chr1	protein_coding	mesoderm induction early response 1, transcriptional regulator
known_NIR_1505	chr1	66984652	66986403	+	66984592	66986403	A5SS	ENST00000355977.10	known	0.64	7	4	7	4	y	0	0	4	0	4	n	0	0	18	0	18	n	0.67	6	3	6	3	n	ENSG00000198160.14	MIER1	chr1	protein_coding	mesoderm induction early response 1, transcriptional regulator
known_NIR_1506	chr1	67424322	67424888	-	67424277	67424888	A3SS	ENST00000370994.8	known	0.41	577	820	577	820	y	0.35	699	1287	699	1287	y	0.34	853	1637	853	1637	y	0.33	835	1733	835	1733	y	ENSG00000142864.14	SERBP1	chr1	protein_coding	SERPINE1 mRNA binding protein 1
known_NIR_1507	chr1	67424977	67425083	-	67424959	67425083	A3SS	ENST00000370994.8	known	0.52	704	640	704	640	y	0.45	838	1026	838	1026	y	0.45	953	1158	953	1158	y	0.46	1048	1240	1048	1240	y	ENSG00000142864.14	SERBP1	chr1	protein_coding	SERPINE1 mRNA binding protein 1
known_NIR_1508	chr1	67685538	67686350	+	67685538;67686126	67686025;67686350	ES	ENST00000370986.8	known	0.12	31	231	31	222;240	y	0.08	17	209	17	233;185	y	0.11	17	137.5	17	160;115	y	0.13	34	225	34	234;216	y	ENSG00000116717.11	GADD45A	chr1	protein_coding	growth arrest and DNA-damage-inducible, alpha
known_NIR_1509	chr1	6785575;6807088	6806983;6825092	+	6785575;6820250	6820181;6825092	MXE	ENST00000303635.11	known	0	0	242.5	0;0	189;296	n	0.01	2.5	259	1;4	193;325	n	0.02	5	251.5	10;0	190;313	n	0.01	2	277.5	2;2	239;316	y	ENSG00000171735.18	CAMTA1	chr1	protein_coding	calmodulin binding transcription activator 1
known_NIR_1510	chr1	68126335	68137780	-	68098753	68137780	A3SS	ENST00000354777.6	known	0.87	273	41	273	41	y	0.95	187	9	187	9	y	0.7	321	139	321	139	y	0.78	343	98	343	98	y	ENSG00000116729.13	WLS	chr1	protein_coding	wntless Wnt ligand secretion mediator
known_NIR_1511	chr1	68159247	68232194	-	68159247;68194227	68193955;68232194	ES	ENST00000262348.8	known	0.01	2	231.5	2	252;211	y	0	0	171	0	171;171	n	0.04	14	339.5	14	378;301	y	0.02	6	361	6	396;326	y	ENSG00000116729.13	WLS	chr1	protein_coding	wntless Wnt ligand secretion mediator
known_NIR_1512	chr1	68159247	68232194	-	68194227	68232194	3pMXE	ENST00000370971.1	known	0.01	2	211	2	211	y	0	0	171	0	171	n	0.04	14	301	14	301	y	0.02	6	326	6	326	y	ENSG00000116729.13	WLS	chr1	protein_coding	wntless Wnt ligand secretion mediator
known_NIR_1513	chr1	6825210	6871757	+	6825210	7091304	A3SS	ENST00000303635.11	known	0.99	383	5	383	5	y	0.97	348	11	348	11	y	0.98	258	4	258	4	y	0.99	331	4	331	4	y	ENSG00000171735.18	CAMTA1	chr1	protein_coding	calmodulin binding transcription activator 1
known_NIR_1514	chr1	6825210	6887654	+	6825210	6871757	3pMXE	ENST00000473578.5	known	0.05	21	383	21	383	y	0.05	17	348	17	348	y	0.03	7	258	7	258	y	0.05	16	331	16	331	y	ENSG00000171735.18	CAMTA1	chr1	protein_coding	calmodulin binding transcription activator 1
known_NIR_1515	chr1	6825210	6887654	+	6825210	7091304	A3SS	ENST00000303635.11	known	0.81	21	5	21	5	y	0.61	17	11	17	11	y	0.64	7	4	7	4	y	0.8	16	4	16	4	y	ENSG00000171735.18	CAMTA1	chr1	protein_coding	calmodulin binding transcription activator 1
known_NIR_1516	chr1	68481612	68482046	-	68481612	68483950	A5SS	ENST00000370966.9	known	1	4	0	4	0	n	0.37	11	19	11	19	y	0.04	3	68	3	68	y	0.34	19	37	19	37	y	ENSG00000024526.16	DEPDC1	chr1	protein_coding	DEP domain containing 1
known_NIR_1517	chr1	68481612	68483950	-	68481612;68482897	68482046;68483950	ES	ENST00000456315.6	known	0	0	2	0	4;0	n	0.72	19	7.5	19	11;4	y	0.94	68	4	68	3;5	y	0.8	37	9.5	37	19;0	n	ENSG00000024526.16	DEPDC1	chr1	protein_coding	DEP domain containing 1
known_NIR_1518	chr1	68482897	68483950	-	68481612	68483950	A3SS	ENST00000370966.9	known	-	-	-	-	-	-	0.17	4	19	4	19	y	0.07	5	68	5	68	y	0	0	37	0	37	n	ENSG00000024526.16	DEPDC1	chr1	protein_coding	DEP domain containing 1
known_NIR_1519	chr1	70205780	70221612	+	70205780	70221615	A3SS	ENST00000370951.5	known	0.36	12	21	12	21	y	0.43	13	17	13	17	y	0	0	12	0	12	n	0.24	11	35	11	35	y	ENSG00000116754.13	SRSF11	chr1	protein_coding	serine/arginine-rich splicing factor 11
known_NIR_1520	chr1	70250503	70250608	+	70250503	70250611	A3SS	ENST00000370951.5	known	0.68	145	69	145	69	y	0.64	146	82	146	82	y	0.57	218	167	218	167	y	0.67	226	112	226	112	y	ENSG00000116754.13	SRSF11	chr1	protein_coding	serine/arginine-rich splicing factor 11
known_NIR_1521	chr1	70355111	70366444	+	70355107	70366444	A5SS	ENST00000361764.8	known	0.6	12	8	12	8	y	0.36	30	54	30	54	y	0.48	14	15	14	15	y	0.56	29	23	29	23	y	ENSG00000197568.13	HHLA3	chr1	protein_coding	HERV-H LTR-associating 3
known_NIR_1522	chr1	70355111	70366444	+	70355208	70366444	A5SS	ENST00000359875.9	known	1	12	0	12	0	n	0.91	30	3	30	3	y	1	14	0	14	0	n	1	29	0	29	0	n	ENSG00000197568.13	HHLA3	chr1	protein_coding	HERV-H LTR-associating 3
known_NIR_1523	chr1	70355208	70366444	+	70355107	70366444	A5SS	ENST00000361764.8	known	0	0	8	0	8	n	0.05	3	54	3	54	y	0	0	15	0	15	n	0	0	23	0	23	n	ENSG00000197568.13	HHLA3	chr1	protein_coding	HERV-H LTR-associating 3
known_NIR_1524	chr1	70416037;70418032	70417937;70421566	+	70416037	70421566	cassetteExon	ENST00000411986.6	known	1	40.5	0	45;36	0	n	0.87	33.5	5	34;33	5	y	1	25.5	0	19;32	0	n	1	39.5	0	42;37	0	n	ENSG00000116761.11	CTH	chr1	protein_coding	cystathionine gamma-lyase
known_NIR_1525	chr1	71065137	71066776	-	71065752	71066776	3pMXE	ENST00000611683.1	known	0.85	121	22	121	22	y	0.61	107	68	107	68	y	0.59	207	143	207	143	y	0.58	134	98	134	98	y	ENSG00000132485.12	ZRANB2	chr1	protein_coding	zinc finger, RAN-binding domain containing 2
known_NIR_1526	chr1	71065137;71065752	71065678;71066776	-	71065137	71066776	cassetteExon	ENST00000370920.7	known	0.15	22	121	22;22	121	y	0.39	69.5	107	71;68	107	y	0.37	123	207	103;143	207	y	0.35	73	134	48;98	134	y	ENSG00000132485.12	ZRANB2	chr1	protein_coding	zinc finger, RAN-binding domain containing 2
known_NIR_1527	chr1	74198426	74199664	+	74198360	74199664	A5SS	ENST00000370898.7	known	0	0	26	0	26	n	0.13	2	13	2	13	y	0	0	34	0	34	n	0	0	44	0	44	n	ENSG00000254685.6	FPGT	chr1	protein_coding	fucose-1-phosphate guanylyltransferase
known_NIR_1528	chr1	74199845	74201318	+	74199831	74201318	A5SS	ENST00000370898.7	known	0.26	5	14	5	14	y	0	0	14	0	14	n	0.28	19	48	19	48	y	0.26	11	32	11	32	y	ENSG00000254685.6	FPGT	chr1	protein_coding	fucose-1-phosphate guanylyltransferase
known_NIR_1529	chr1	74706994	74710098	-	74706994;74707204	74707103;74710098	ES	ENST00000370872.7	known	0.08	8	89	8	75;103	y	0.14	26	161	26	185;137	y	0.18	53	236	53	251;221	y	0.18	35	158	35	167;149	y	ENSG00000116791.13	CRYZ	chr1	protein_coding	crystallin, zeta (quinone reductase)
known_NIR_1530	chr1	74714630;74719372	74719209;74723118	-	74714630	74723118	cassetteExon	ENST00000370872.7	known	1	93.5	0	106;81	0	n	1	158	0	105;211	0	n	1	108	0	84;132	0	n	0.93	182.5	14	165;200	14	y	ENSG00000116791.13	CRYZ	chr1	protein_coding	crystallin, zeta (quinone reductase)
known_NIR_1531	chr1	74723270;74724834	74724711;74732956	-	74723270	74732956	cassetteExon	ENST00000370872.7	known	0.95	101.5	5	149;54	5	y	1	124	0	155;93	0	n	1	178.5	0	245;112	0	n	0.99	185	2	223;147	2	y	ENSG00000116791.13	CRYZ	chr1	protein_coding	crystallin, zeta (quinone reductase)
known_NIR_1532	chr1	74724834;74730420	74730382;74732956	-	74724834	74732956	cassetteExon	ENST00000340866.9	known	0.18	12	54	19;5	54	y	0.24	30	93	22;38	93	y	0.18	25	112	29;21	112	y	0.22	42	147	44;40	147	y	ENSG00000116791.13	CRYZ	chr1	protein_coding	crystallin, zeta (quinone reductase)
known_NIR_1533	chr1	74730420	74732956	-	74723270	74732956	A3SS	ENST00000370872.7	known	0.5	5	5	5	5	y	1	38	0	38	0	n	1	21	0	21	0	n	0.95	40	2	40	2	y	ENSG00000116791.13	CRYZ	chr1	protein_coding	crystallin, zeta (quinone reductase)
known_NIR_1534	chr1	74736622;74738788	74738690;74748751	+	74736622	74748751	cassetteExon	ENST00000457880.6	known	0.88	30.5	4	28;33	4	y	0.97	75	2	75;75	2	y	0.91	75	7	86;64	7	y	0.86	89.5	15	85;94	15	y	ENSG00000162623.15	TYW3	chr1	protein_coding	tRNA-yW synthesizing protein 3 homolog (S. cerevisiae)
known_NIR_1535	chr1	75724817	75728389	+	75724817	75728401	A3SS	ENST00000370841.8	known	0	0	43	0	43	n	0.17	17	83	17	83	y	0	0	139	0	139	n	0.01	1	134	1	134	n	ENSG00000117054.13	ACADM	chr1	protein_coding	acyl-CoA dehydrogenase, C-4 to C-12 straight chain
known_NIR_1536	chr1	75724817;75728488	75728389;75732644	+	75724817	75732644	cassetteExon	ENST00000541113.5	known	0.87	41	6	0;82	6	n	0.86	100.5	17	17;184	17	y	0.69	111	50	0;222	50	n	0.92	97	9	1;193	9	n	ENSG00000117054.13	ACADM	chr1	protein_coding	acyl-CoA dehydrogenase, C-4 to C-12 straight chain
[truncated: 51,176 more rows]

## Sheet: IR
#ID	Chr	Ass1	Ass2	Strand	Type	Isoform	KorN	shCtrl_1st:Ratio	shCtrl_1st:intron_ave_base	shCtrl_1st:ends_exon_ave_base	shCtrl_1st:isfiltered	shCtrl_2nd:Ratio	shCtrl_2nd:intron_ave_base	shCtrl_2nd:ends_exon_ave_base	shCtrl_2nd:isfiltered	shFLNB_1st:Ratio	shFLNB_1st:intron_ave_base	shFLNB_1st:ends_exon_ave_base	shFLNB_1st:isfiltered	shFLNB_2nd:Ratio	shFLNB_2nd:intron_ave_base	shFLNB_2nd:ends_exon_ave_base	shFLNB_2nd:isfiltered	Gene	Symbol	Chr	GeneType	Description
[truncated: 11,030 more rows]
